# Supplementary material for: Mantle transcriptome sequencing of Mytilus spp. and identification of putative biomineralization genes
Source: PeerJ. 2019 Jan 14;6:e6245. doi: 10.7717/peerj.6245 (PMC6359903; doi:10.7717/peerj.6245)
Supplement: Supplemental Information 10 [file peerj-07-6245-s010.xlsx]

## Sheet: Arkusz1
Description	Publication
2',3'-Cyclic Nucleotide 3' Phosphodiesterase	Clark et al. 2010
65 kDa Yes-associated protein	Sun et al. 2015
67kD laminin receptor precursor	Joubert et al. 2010
70 kDa heat shock protein	Zhao et al. 2012
75 K calcineurin-binding protein	Shi et al. 2013b
Acid phosphatase -1	Zhao et al. 2012
Acid phosphatase 1, soluble isoform 2	Zhao et al. 2012
Acid phosphatase 2	Zhao et al. 2012
acid phosphatase 5, tartrate resistant (acp5)	Clark et al. 2010
Acid phosphatase 6, lysophosphatidic	Zhao et al. 2012
Acid phosphatase isoenzyme	Zhao et al. 2012
Acid phosphatase-like protein 2-like	Zhao et al. 2012
Actin filament-associated protein 1	Sun et al. 2015
Activating Transcription Factor 2	Clark et al. 2010
Activin A Receptor Type 1	Clark et al. 2010
activin A receptor type II-like 1	Clark et al. 2010
acyl-Coenzyme A dehydrogenase	Jackson et al. 2010
ADAM Metallopeptidase With Thrombospondin Type 1 Motif 1	Clark et al. 2010
ADAM Metallopeptidase With Thrombospondin Type 1 Motif 2	Clark et al. 2010
Adenosine Kinase	Clark et al. 2010
Adenosine Kinase I	Clark et al. 2010
Adenosine Kinase II	Clark et al. 2010
Adenosine Kinase III	Clark et al. 2010
Adrenomedullin	Clark et al. 2010
aggrecan1(AGC1)transcriptvariant1	Clark et al. 2010
aggrecan1(AGC1)transcriptvariant2	Clark et al. 2010
Alanine and glycine-rich protein	Bjärnmark et al. 2016
Alkaline phosphatase	Clark et al. 2010; Zhao et al. 2012; Shi et al. 2013a; Sun et al. 2015
Amorphous calcium carbonate binding protein 1 (ACCBP)	Joubert et al. 2010; Denget al. 2014
Amylase	Clark et al. 2010
Amylase-like	Clark et al. 2010
Ankyrin repeat protein	Jackson et al. 2010
Annexin 2a	Clark et al. 2010
Annexin a11	Clark et al. 2010
Anosmin 1	Clark et al. 2010
aplysianin-like protein	Liao et al. 2015
Aquaporin 1	Clark et al. 2010
Aquaporin 10	Clark et al. 2010
Aquaporin 2	Clark et al. 2010
Aquaporin 3	Clark et al. 2010
Aquaporin 4	Clark et al. 2010
Aquaporin 5	Clark et al. 2010
Aquaporin 6	Clark et al. 2010
Aquaporin 7	Clark et al. 2010
Aquaporin 8	Clark et al. 2010
Aquaporin 9	Clark et al. 2010
Aquaporin-t2	Clark et al. 2010
Aquaporin-t4	Clark et al. 2010
arginine kinase-like protein	Liao et al. 2015
Arylsulfatase B	Sun et al. 2015
Asp and Cys rich secreted protein	Jackson et al. 2010
Asparaginase Like 1	Clark et al. 2010
Asparagine-rich protein	Joubert et al. 2010; Shi et al. 2013a; Bjärnmark et al. 2016
Aspein (shell matrix protein)	Joubert et al. 2010; Zhao et al. 2012; Shi et al. 2013a
astacin-like protein	Deng et al. 2014
ATP synthase subunit g	Sun et al. 2015
ATP-dependent RNA helicase DHX34	Sun et al. 2015
bicaudal-D	Deng et al. 2014
Biglycan	Clark et al. 2010
bindin precursor 5	Jackson et al. 2010
bone morphogenetic protein	Liao et al. 2015; Bjärnmark et al. 2016
bone morphogenetic protein 2 precursor	Clark et al. 2010; Joubert et al. 2010; Deng et al. 2014
bone morphogenic protein 1	Clark et al. 2010
bone morphogenic protein 2/4	Joubert et al. 2010; Sun et al. 2015
bone morphogenic protein 2-B	Sun et al. 2015
bone morphogenic protein 3	Clark et al. 2010; Sun et al. 2015
bone morphogenic protein 4	Clark et al. 2010
bone morphogenic protein 5	Clark et al. 2010
bone morphogenic protein 5-8	Fang et al. 2011
bone morphogenic protein 6	Clark et al. 2010
bone morphogenic protein 7	Clark et al. 2010; Sun et al. 2015
Brother of CDO	Sun et al. 2015
Ca(2+)/calmodulin-responsive adenylate cyclase	Shi et al. 2013a; Sun et al. 2015
Calcineurin A	Shi et al. 2013a; Deng et al. 2014 ; Sun et al. 2015
Calcineurin B	Shi et al. 2013a; Shi et al. 2013b; Deng et al. 2014; Sun et al. 2015
Calcitonin receptor	Clark et al. 2010; Shi et al. 2013a; Sun et al. 2015
Calcitonin Receptor	Clark et al. 2010
Calcitonin Related Polypeptide Alpha	Clark et al. 2010
Calcitonin Related Polypeptide Beta	Clark et al. 2010
Calcitonin-related receptor precursor	Shi et al. 2013b
calcium ATPase (PMCA)	Clark et al. 2010; Joubert et al. 2010
Calcium binding protein P22	Clark et al. 2010
Calcium homeostasis endoplasmic reticulum protein	Shi et al. 2013b
calcium/calmodulin-dependent protein	Fang et al. 2011
Calcium/calmodulin-dependent protein kinase	Shi et al. 2013a
Calcium/calmodulin-dependent protein kinase kinase	Shi et al. 2013b
calcium/calmodulin-dependent protein kinase type 1	Sun et al. 2015
calcium/calmodulin-dependent protein kinase type 1	Deng et al. 2014
calcium/calmodulin-dependent protein kinase type 1D	Deng et al. 2014
calcium/calmodulin-dependent protein kinase type II	Sun et al. 2015
Calcium/calmodulin-dependent serine protein kinase 1	Joubert et al. 2010; Zhao et al. 2012
calcium/calmodulin-dependent serine protein kinase isoform 2	Sun et al. 2015
Calcium-dependent protein kinase	Joubert et al. 2010; Shi et al. 2013b
calcium-dependent protein kinase 5	Sun et al. 2015
calcium-dependent protein kinase isoform 2	Sun et al. 2015
Calcium-dependent secretion activator 1	Shi et al. 2013b
Calcium-transporting ATPase type 2 C member, putative	Shi et al. 2013b
calcium-transporting ATPase type 2C member 1	Sun et al. 2015
calconectin	Deng et al. 2014
Calcyclin-binding protein	Shi et al. 2013a
Calmodulin	Clark et al. 2010; Joubert et al. 2010; Fang et al. 2011; Zhao et al. 2012; Shi et al. 2013b; Sun et al. 2015
calmodulin 1b	Clark et al. 2010
Calmodulin 2-like	Zhao et al. 2012
calmodulin 3a	Clark et al. 2010
Calmodulin B	Zhao et al. 2012
Calmodulin, isoform A	Shi et al. 2013b
Calmodulin1	Clark et al. 2010
Calmodulin-2	Sun et al. 2015
Calmodulin-5/6/7/8	Sun et al. 2015
Calmodulin-binding carboxy-terminal kinesin	Zhao et al. 2012; Sun et al. 2015
Calmodulin-like protein	Zhao et al. 2012; Shi et al. 2013a; Deng et al. 2014; Sun et al. 2015
Calmodulin-like protein 1	Deng et al. 2014; Sun et al. 2015
Calmodulin-like protein 11	Zhao et al. 2012
Calmodulin-like protein 12	Shi et al. 2013a
Calmodulin-like protein 3	Zhao et al. 2012; Deng et al. 2014
Calmodulin-like protein 3-like	Zhao et al. 2012
Calmodulin-like protein 4	Shi et al. 2013a; Deng et al. 2014; Sun et al. 2015
Calmodulin-like protein 5	Zhao et al. 2012
Calponin	Shi et al. 2013a; Liao et al. 2015; Sun et al. 2015; Bjärnmark et al. 2016; Sleight et al. 2016
Calponin 2	Shi et al. 2013a
Calponin-like protein	Shi et al. 2013b; Liao et al. 2015
calponin-like protein-1	Liao et al. 2015
calponin-like protein-2	Liao et al. 2015
Calreticulin	Clark et al. 2010; Joubert et al. 2010; Shi et al. 2013b; Shi et al. 2013a; Sun et al. 2015
Calreticulin 2	Clark et al. 2010
Calreticulin 3	Clark et al. 2010
Calreticulin-like	Clark et al. 2010
calsequestrin 1a precursor	Deng et al. 2014
CaM kinase II alpha	Deng et al. 2014
CAMP Responsive Element Binding Protein	Bjärnmark et al. 2016
cAMP-dependent transcription factor ATF-1	Clark et al. 2010
Carbonic anhydrase	Shi et al. 2013a; Liao et al. 2015; Bjärnmark et al. 2016
Carbonic anhydrase 1	Shi et al. 2013b
Carbonic anhydrase 2	Sun et al. 2015
Carbonic anhydrase 3	Sun et al. 2015
Carbonic anhydrase precursor	Joubert et al. 2010; Sun et al. 2015
carbonic anhydrase VII-like	Shi et al. 2013b
Carbonic anhydrase-like	Liao et al. 2015; Sun et al. 2015
carcinoembryonic immunoglobulin-like	Jackson et al. 2010
Cartilage Acidic Protein 1	Clark et al. 2010
Cartilage matrix-like protein/Von Willebrand factor type A domain	Sleight et al. 2016
Cartilage Oligomeric Matrix Protein	Clark et al. 2010
cartilagelinkprotein	Clark et al. 2010
Catalase	Zhao et al. 2012
catchin-like protein	Liao et al. 2015
Cathepsin D	Jackson et al. 2010
Caveolin-1	Clark et al. 2010
Ccalcium/calmodulin-dependent serine protein kinase	Zhao et al. 2012
Ccnidarian egg lectin isoform c	Zhao et al. 2012
CDGSH iron sulfur domain	Jackson et al. 2010
c-Fos	Clark et al. 2010
Chain D, Crystal structure	Sun et al. 2015
chitin deacetylase 5 isoform A	Jackson et al. 2010
chitin deacetylase-like protein	Liao et al. 2015
Chitin synthase	Joubert et al. 2010; Fang et al. 2011; Shi et al. 2013a; Sun et al. 2015
chitin synthase 1	Sun et al. 2015
chitin synthase 3	Sun et al. 2015
Chitin-binding domain	Sleight et al. 2016
chitinlase-lke protein	Liao et al. 2015
chloride channel calcium activated 2-like	Shi et al. 2013b
Chymotrypsin Like	Clark et al. 2010
Chymotrypsin Like 1	Clark et al. 2010
Chymotrypsin Like 2	Clark et al. 2010
Chymotrypsin Like 3	Clark et al. 2010
Cleavage and polyadenylation specificity factor subunit 1	Sun et al. 2015
Cnidarian egg lectin isoform b	Zhao et al. 2012
COL10A1	Clark et al. 2010
COL11A2	Clark et al. 2010
COL11A2transcriptvariant1	Clark et al. 2010
COL11A2transcriptvariant2	Clark et al. 2010
COL12A1	Clark et al. 2010; Fang et al. 2011; Sun et al. 2015
Col14/undulin	Clark et al. 2010
COL14A1	Clark et al. 2010; Sun et al. 2015
COL15A1	Clark et al. 2010; Sun et al. 2015
COL16A1	Clark et al. 2010
COL18A1	Clark et al. 2010
COL19A1	Clark et al. 2010
COL1A1	Clark et al. 2010
COL1A3	Clark et al. 2010
COL24A1	Clark et al. 2010
COL27A1	Clark et al. 2010
COL2A1	Clark et al. 2010
COL4A3	Clark et al. 2010
COL4A6	Clark et al. 2010
COL5A1	Clark et al. 2010
COL5A2/Col2A2	Clark et al. 2010
COL5A3	Clark et al. 2010
COL6A1	Clark et al. 2010
COL6A2	Clark et al. 2010
COL6A3	Clark et al. 2010; Sun et al. 2015
COL7A1	Clark et al. 2010
COL8A1	Clark et al. 2010
COL8A2	Clark et al. 2010
COL9A1	Clark et al. 2010
COL9A1transcriptvariant2	Clark et al. 2010
COL9A2	Clark et al. 2010
Cold shock domain-containing protein E1	Bjärnmark et al. 2016
Collagen alpha-1 precursor, putative	Sun et al. 2015
Collagen alpha-1(IV) chain	Sun et al. 2015
Collagen alpha-1(XXVIII) chain	Sun et al. 2015
Collagen alpha-2(I) chain	Sun et al. 2015
Collagen alpha-4(VI) chain	Sun et al. 2015
Collagen alpha-5(VI) chain	Sun et al. 2015
Collagen family member (col-17)	Fang et al. 2011
Collagen pro alpha-chain	Fang et al. 2011; Sun et al. 2015
Collagen type VI alpha 6	Fang et al. 2011
collagen-like protein-1	Liao et al. 2015
Collagen-like protein-2	Liao et al. 2015
COLV/XIA1	Clark et al. 2010
Complement control protein domain	Sleight et al. 2016
Connective Tissue Growth Factor	Clark et al. 2010
Conopressin	Clark et al. 2010
Copper chaperone for superoxide dismutase-like	Zhao et al. 2012
Copper/zinc superoxide dismutase family protein	Zhao et al. 2012
Corticotropin Releasing Hormone	Clark et al. 2010
Corticotropin Releasing Hormone Receptor 1	Clark et al. 2010
Corticotropin Releasing Hormone Receptor 2	Clark et al. 2010
Corticotropin Releasing Hormone Receptor like	Clark et al. 2010
Corticotropin Releasing Hormone-like family 2 GPCR	Clark et al. 2010
C-type lectin	Jackson et al. 2010
C-type lectin 13	Zhao et al. 2012
C-type lectin 16	Zhao et al. 2012
C-type lectin 2	Joubert et al. 2010; Sun et al. 2015
C-type lectin 2 like protein	Zhao et al. 2012; Sun et al. 2015
C-type lectin 5	Zhao et al. 2012; Sun et al. 2015
C-type lectin A	Zhao et al. 2012; Sun et al. 2015
C-type lectin B	Sun et al. 2015
C-type lectin C	Zhao et al. 2012
C-type lectin D1	Zhao et al. 2012
C-type lectin D2	Zhao et al. 2012
C-Type Lectin Domain Family 3 Member B	Clark et al. 2010
C-type lectin domain family 4 member E	Zhao et al. 2012
C-type lectin family member (clec-174)	Zhao et al. 2012
C-type lectin family member (clec-198)	Zhao et al. 2012
C-type lectin family member (clec-200)	Zhao et al. 2012
C-type Lectin family member (clec-223)	Zhao et al. 2012
C-type lectin isoform 3	Sun et al. 2015
C-type lectin-1	Joubert et al. 2010; Fang et al. 2011; Zhao et al. 2012; Sun et al. 2015
Cu/Zn superoxide dismutase 1	Zhao et al. 2012
Cyclin- dependent kinase inhibitor 3	Clark et al. 2010
Cyclophilin	Jackson et al. 2010
cystein and glycine-rich protein 3	Sun et al. 2015
cysteine-rich motor neuron, putative	Fang et al. 2011
Delta-like protein C	Sun et al. 2015
Dentin Matrix Acidic Phosphoprotein 1	Clark et al. 2010
Dentin Sialophosphoprotein	Clark et al. 2010
Dermatopontin	Jackson et al. 2010; Zhao et al. 2012; Bjärnmark et al. 2016
Dermatopontin 2	Zhao et al. 2012; Liao et al. 2015
Dermatopontin 3	Zhao et al. 2012
desert hedgehog	Clark et al. 2010
Discs, large homolog 7	Clark et al. 2010
disintegrin-like and metalloprotease with throm	Clark et al. 2010
dual specificity protein phosphatase 23-like	Sun et al. 2015
E3 ubiquitin-protein ligase HERC1	Sun et al. 2015
E3 ubiquitin-protein ligase TRIM33	Sun et al. 2015
ectodysplasin-A receptor	Sun et al. 2015
EF-hand calcium-binding domain-containing protein	Shi et al. 2013a
EF-hand calcium-binding domain-containing protein 2	Sun et al. 2015
EF-hand calcium-binding domain-containing protein 5-like isoform 1	Sun et al. 2015
EF-hand calcium-binding domain-containing protein 6	Sun et al. 2015
EF-hand calcium-binding domain-containing protein 7	Sun et al. 2015
EF-hand calcium-binding protein	Shi et al. 2013b
EF-hand calcium-binding protein 1	Shi et al. 2013a
EF-hand domain-containing protein 2	Clark et al. 2010
ELF 1 alpha (chimera)	Jackson et al. 2010
embryonic protein UVS.2-like	Sun et al. 2015
Enamelin	Clark et al. 2010
endoderm-specific alkaline phosphatase	Zhao et al. 2012
Endothelial cells scavenger receptor-like	Zhao et al. 2012
engrailed	Joubert et al. 2010
Enoyl-CoA hydratase/isomerase	Jackson et al. 2010
EP protein	Joubert et al. 2010; Liao et al. 2015
Epidermal Growth Factor	Clark et al. 2010; Jackson et al. 2010
Epididymal sperm binding protein	Clark et al. 2010
ets variant gene 6 protein (ETV6)	Clark et al. 2010
Extracellular Matrix Protein 1	Clark et al. 2010
family 2 GPCR	Clark et al. 2010
family 2 GPCR CALR	Clark et al. 2010
Fasciclin-like	Bjärnmark et al. 2016
Ferritin	Fang et al. 2011; Zhao et al. 2012; Sun et al. 2015
ferritin 1	Sun et al. 2015
ferritin 3	Sun et al. 2015
ferritin CFA	Sun et al. 2015
Ferritin GF2	Zhao et al. 2012
Ferritin light chain-like	Zhao et al. 2012
Ferritin, heavy polypeptide 1, isoform CRA_g	Zhao et al. 2012
ferritin-like	Joubert et al. 2010
Ferritin-like protein	Fang et al. 2011; Zhao et al. 2012
fibrinogen beta chain(FGB)	Clark et al. 2010
Fibroblast Growth Factor 1	Clark et al. 2010
Fibroblast Growth Factor 1A	Clark et al. 2010
Fibroblast Growth Factor 2	Clark et al. 2010
Fibroblast growth factor receptor	Clark et al. 2010; Sun et al. 2015
Fibroblast Growth Factor Receptor 1	Clark et al. 2010
Fibroblast Growth Factor Receptor 1 oncogene partner 2	Clark et al. 2010
Fibroblast Growth Factor Receptor 3	Clark et al. 2010
Fibroblast Growth Factor Receptor 4	Clark et al. 2010
fibroin-like protein-1	Liao et al. 2015
fibroin-like protein-2	Liao et al. 2015
Fibronectin	Fang et al. 2011; Liao et al. 2015; Bjärnmark et al. 2016
Fibronectin 1	Clark et al. 2010
fibronectin 1a	Clark et al. 2010
fibronectin 1b	Clark et al. 2010
Fibronectin-like protein	Liao et al. 2015
filament-like protein-1	Liao et al. 2015
filament-like protein-2	Liao et al. 2015
filamin-like protein-1	Liao et al. 2015
Filamin-like protein-2	Liao et al. 2015
filamin-like protein-3	Liao et al. 2015
Flp-like	Bjärnmark et al. 2016
fms-related tyrosine kinase 3 (FLT3)	Clark et al. 2010
Follistatin-A	Sun et al. 2015
Follistatin-related protein 3	Sun et al. 2015
Follistatin-related protein 4	Sun et al. 2015
Follistatin-related protein 5	Sun et al. 2015
G protein alpha subunit	Shi et al. 2013a
G protein beta subunit	Shi et al. 2013a
G protein gamma subunit	Shi et al. 2013a
Galactose-binding lectin	Zhao et al. 2012
Galectin	Zhao et al. 2012
Galectin-4	Zhao et al. 2012
GAL-rich protein	Liao et al. 2015
GAS-rich protein	Liao et al. 2015
Gastric Inhibitory Polypeptide Receptor	Clark et al. 2010
Gastric Inhibitory Polypeptide Receptor-like	Clark et al. 2010
GATA123a	Sun et al. 2015
Glucagon	Clark et al. 2010
Glucagon 1	Clark et al. 2010
Glucagon A	Clark et al. 2010
Glucagon II	Clark et al. 2010
Glucagon Like Peptide 1	Clark et al. 2010
Glucagon Like Peptide 1 Receptor	Clark et al. 2010
Glucagon Like Peptide 2 Receptor	Clark et al. 2010
Glucagon Receptor	Clark et al. 2010
Glucagon Receptor-like	Clark et al. 2010
Glucose regulated protein	Jackson et al. 2010
Glycosyl hydrolase	Jackson et al. 2010
Glypican-6	Sun et al. 2015
G-protein a-subunit s class	Joubert et al. 2010
Growth Hormone Releasing Hormone	Clark et al. 2010
Growth Hormone Releasing Hormone Receptor	Clark et al. 2010
GR-rich protein	Liao et al. 2015
Haloacid dehalogenase-like	Sun et al. 2015
Heart-sarcoplasmic/endoplasmic reticulum calcium dependent	Clark et al. 2010
Heat shock inducible protein 70	Zhao et al. 2012
Heat shock protein 110	Zhao et al. 2012
Heat shock protein 12	Zhao et al. 2012
Heat shock protein 12A	Zhao et al. 2012; Sun et al. 2015
Heat shock protein 12A, isoform CRA_b	Zhao et al. 2012
Heat shock protein 16	Zhao et al. 2012
Heat shock protein 20.6	Zhao et al. 2012
Heat shock protein 40A	Zhao et al. 2012
Heat shock protein 60	Zhao et al. 2012
Heat shock protein 68	Bjärnmark et al. 2016
Heat shock protein 70	Fang et al. 2011; Zhao et al. 2012; Sun et al. 2015
heat shock protein 70 B2	Sun et al. 2015
Heat shock protein 90	Zhao et al. 2012
Heat shock protein 90kDa alpha (cytosolic), class A member 1	Zhao et al. 2012
Heat shock protein beta-1	Zhao et al. 2012
Heat shock protein DnaJ family protein	Zhao et al. 2012
Heat Shock Protein family member (hsp-6)-like	Zhao et al. 2012
Heat shock protein Hsp21.3	Zhao et al. 2012
hephaestin-like protein	Liao et al. 2015
Heterotrimeric G protein alpha subunit B	Sun et al. 2015
HIF1AN	Clark et al. 2010
Histidine acid phosphatase domain containing 1	Zhao et al. 2012
Histidine-rich glycoprotein precursor [Schistosoma japonicum]	Deng et al. 2014
homeobox protein 4	Joubert et al. 2010
Hyaluronan Synthase 1	Clark et al. 2010
hydrolase domain-containing protein 1A	Sun et al. 2015
Hydroxysteroid dehydrogenase-like	Jackson et al. 2010
IBSP-integrin-binding sialoprotein	Clark et al. 2010
Immunoglobulin superfamily, DCC subclass, member 4	Zhao et al. 2012
Immunoglobulin superfamily, member 9B	Zhao et al. 2012
Immunoglobulin-like variable motif-containing protein	Zhao et al. 2012
Incilarin A	Joubert et al. 2010
Incilarin C	Joubert et al. 2010
Indian_hedgehog	Clark et al. 2010
inositol polyphosphate phosphatase	Jackson et al. 2010
Insoluble matrix shell protein	Liao et al. 2015; Bjärnmark et al. 2016
Insulin Like Growth Factor 1	Clark et al. 2010
Insulin Like Growth Factor 2	Clark et al. 2010
Insulin Like Growth Factor Binding Protein 1	Clark et al. 2010
insulin-like growth factor I receptor form A	Clark et al. 2010
Interferon Beta 1	Clark et al. 2010
Interferon Gamma	Clark et al. 2010
Intestinal alkaline phosphatase III	Zhao et al. 2012
IP-rich protein	Liao et al. 2015
Iron/zinc purple acid phosphatase-like protein-like	Zhao et al. 2012
i-type-lysozyme	Zhao et al. 2012
Jacalin-related lectin	Zhao et al. 2012
Jacalin-related lectin PPL2-a	Joubert et al. 2010
Kallmann syndrome 1	Clark et al. 2010
Katanin p60 ATPase-containing subunit	Sun et al. 2015
Kazal-type serine proteinase inhibitor	Sun et al. 2015
kinase kinase 1, alpha	Fang et al. 2011
KNG-rich protein	Liao et al. 2015
KRMP 1	Shi et al. 2013a
KRMP 2	Joubert et al. 2010
KRMP 9	Joubert et al. 2010
KRMP-10	Joubert et al. 2010; Deng et al. 2014
KRMP-11	Deng et al. 2014
KRMP-4	Deng et al. 2014
KRMP-5	Joubert et al. 2010; Deng et al. 2014
KRMP-6	Deng et al. 2014
KRMP-7	Jackson et al. 2010; Joubert et al. 2010; Deng et al. 2014
KRMP-8	Jackson et al. 2010; Joubert et al. 2010; Deng et al. 2014
Kruppel-like factor 10 TFGIF	Clark et al. 2010
KSL-rich protein	Liao et al. 2015
KS-rich protein	Liao et al. 2015
Kunitz-domain protease inhibitor	Jackson et al. 2010
Kunitz-like protease inhibitor	Jackson et al. 2010; Sun et al. 2015
Laminin alpha 4	Clark et al. 2010
LAMININ C1	Clark et al. 2010
laminin_beta1(LAMB1)	Clark et al. 2010
laminin_beta2(LAMB2)	Clark et al. 2010
laminin_beta3(LAMB3)	Clark et al. 2010
laminin_beta4(LAMB4)	Clark et al. 2010
laminin_gamma1(LAMC1)	Clark et al. 2010
laminin1(LAMA1)	Clark et al. 2010
laminin2(LAMA2)	Clark et al. 2010
laminin3(LAMA3)	Clark et al. 2010
laminin4(LAMA4)	Clark et al. 2010
laminin5(LAMA5)	Clark et al. 2010
Latent Transforming Growth Factor Beta Binding Protein 1	Clark et al. 2010
LDLR chaperone MESD	Sun et al. 2015
lectin	Joubert et al. 2010; Zhao et al. 2012
leptin	Clark et al. 2010
Leucine-, glutamate- and lysine-rich protein 1	Sun et al. 2015
Leucine-rich repeat-containing protein 23	Sun et al. 2015
Leucine-rich repeat-like protein	Sun et al. 2015
Leucine-rich repeats and immunoglobulin-like domains 2-like	Zhao et al. 2012
Leucine-rich repeats and immunoglobulin-like domains protein 3	Zhao et al. 2012
linkine	Joubert et al. 2010; Deng et al. 2014
Liver-Sarcoplasmic/endoplasmic reticulum calcium dependent	Clark et al. 2010
Low-density lipoprotein receptor-related protein 8	Sun et al. 2015
L-type voltage-dependent calcium channel beta subunit	Shi et al. 2013b, Joubert et al. 2010
Lustrin A	Zhao et al. 2012; Shi et al. 2013a; Deng et al. 2014; Liao et al. 2015; Bjärnmark et al. 2016
Lysine-rich matrix protein 2	Shi et al. 2013b
Lysine-rich matrix protein 3	Shi et al. 2013b
Lysine-rich matrix protein 4	Shi et al. 2013b
Lysine-rich matrix protein-1	Shi et al. 2013b
Lysosomal acid phosphatase	Zhao et al. 2012
Lysozyme	Jackson et al. 2010
Lysozyme g	Zhao et al. 2012
Manganese-superoxide dismutase	Zhao et al. 2012
Mannose binding lectin (C), isoform CRA_a	Zhao et al. 2012
Mannose lectin ERGIC-53	Zhao et al. 2012
Mantle gene 1	Shi et al. 2013b
Mantle gene 2	Shi et al. 2013b; Joubert et al. 2010
Mantle gene 3	Joubert et al. 2010
Mantle gene 4	Shi et al. 2013b; Joubert et al. 2010
Mantle gene 5	Shi et al. 2013b; Deng et al. 2014
Mantle gene 8	Shi et al. 2013b; Joubert et al. 2010
Mantle protein	Jackson et al. 2010; Deng et al. 2014
Mantle protein 10	Shi et al. 2013b; Joubert et al. 2010; Shi et al. 2013a; Deng et al. 2014
Mantle protein 11	Shi et al. 2013b; Joubert et al. 2010; Shi et al. 2013a; Deng et al. 2014
Mantle protein 12	Shi et al. 2013b; Joubert et al. 2010; Deng et al. 2014
Mantle protein 9	Shi et al. 2013b; Joubert et al. 2010; Deng et al. 2014
Matrilin 1	Clark et al. 2010
Matrilin 2	Clark et al. 2010
Matrilin 3	Clark et al. 2010
Matrix Extracellular Phosphoglycoprotein	Clark et al. 2010
Matrix gla protein	Clark et al. 2010
Matrix Metallopeptidase 1	Clark et al. 2010
Matrix Metallopeptidase 10	Clark et al. 2010
Matrix Metallopeptidase 11	Clark et al. 2010
Matrix Metallopeptidase 12	Clark et al. 2010
Matrix Metallopeptidase 13	Clark et al. 2010
Matrix Metallopeptidase 14	Clark et al. 2010
Matrix Metallopeptidase 15	Clark et al. 2010
Matrix Metallopeptidase 16	Clark et al. 2010
Matrix Metallopeptidase 17	Clark et al. 2010
Matrix Metallopeptidase 2	Clark et al. 2010
Matrix Metallopeptidase 20	Clark et al. 2010
Matrix Metallopeptidase 24	Clark et al. 2010
Matrix Metallopeptidase 26	Clark et al. 2010
Matrix Metallopeptidase 3	Clark et al. 2010
Matrix Metallopeptidase 7	Clark et al. 2010
Matrix Metallopeptidase 8	Clark et al. 2010
Matrix Metallopeptidase 9	Clark et al. 2010
Membrane primary amine oxidase	Sun et al. 2015
metallothionein mRNA	Joubert et al. 2010
MHSPLP	Liao et al. 2015
MICAL-like protein 2	Sun et al. 2015
molluscan prismatic and nacreous layer protein [Pinctada margaritifera]	Deng et al. 2014
Monocarboxylate transporter 9	Sun et al. 2015
Mothers against decapentaplegic homolog	Bjärnmark et al. 2016
mpn88-lack6	Joubert et al. 2010
MSI 60	Joubert et al. 2010; Fang et al. 2011
MSI25 (protein)	Joubert et al. 2010
MSI60-like protein	Deng et al. 2014; Liao et al. 2015
MSI7 (glycine-rich shell matrix protein	Joubert et al. 2010; Fang et al. 2011; Shi et al. 2013b; Deng et al. 2014
MSP domain protein,Glu-and Lys-rich central domain	Zhao et al. 2012
MUSP-1	Shi et al. 2013a; Liao et al. 2015
MUSP-2	Liao et al. 2015
MUSP-3	Liao et al. 2015
Myomodulin neuropeptide 2	Sun et al. 2015
Mytilin-1	Bjärnmark et al. 2016
Mytilin-2	Bjärnmark et al. 2016
Mytilin-3	Bjärnmark et al. 2016
N 14 matrix protein	Jackson et al. 2010; Deng et al. 2014
N151	Shi et al. 2013a; Sun et al. 2015
N16.3 matrix protein [Pinctada fucata]	Deng et al. 2014
N33	Joubert et al. 2010
N44	Joubert et al. 2010
N66	Joubert et al. 2010; Zhao et al. 2012; Shi et al. 2013a; Deng et al. 2014; Liao et al. 2015; Bjärnmark et al. 2016
Nacre protein	Shi et al. 2013b; Joubert et al. 2010
Nacrein	Zhao et al. 2012; Shi et al. 2013b; Deng et al. 2014; Liao et al. 2015; Bjärnmark et al. 2016
Nacrein A1	Deng et al. 2014; Liao et al. 2015; Bjärnmark et al. 2016
nacrein B3	Deng et al. 2014
Nacrein B4	Deng et al. 2014; Bjärnmark et al. 2016
Nacrein-like protein	Liao et al. 2015; Bjärnmark et al. 2016
Nacrein-like protein C1	Zhao et al. 2012
Nacrein-like protein C2	Deng et al. 2014
Nacrein-like protein F	Zhao et al. 2012; Deng et al. 2014
Nacrein-like protein M	Zhao et al. 2012
Nacrein-like protein-1	Liao et al. 2015
Nacrein-like protein-2	Liao et al. 2015
Na-dependent Cl/HCO3 exchanger	Jackson et al. 2010
NaPi-IIb2	Clark et al. 2010
Neural cell adhesion molecule L1	Sun et al. 2015
Neurocalcin	Shi et al. 2013a
Neurocalcin-like protein	Shi et al. 2013a
Neuronal calcium sensor 2	Sun et al. 2015
Neuronal calcium sensor-1	Shi et al. 2013b; Joubert et al. 2010
Neurotransmitter:sodium symporter activity	Jackson et al. 2010
Neurotrypsin	Sun et al. 2015
neurotrypsin-like	Sun et al. 2015
NFATC2transcriptvariant2	Clark et al. 2010
Nicotinic acetylcholine receptor alpha 1 subunit	Sun et al. 2015
Nicotinic acetylcholine receptor alpha 9d subunit	Fang et al. 2011
Nicotinic acetylcholine receptor subunit ACR-26-like	Sun et al. 2015
Nicotinic acetylcholine receptor subunit type A	Sun et al. 2015
Nicotinic acetylcholine receptor subunit type D	Sun et al. 2015
Nicotinic acetylcholine receptor subunit type H	Sun et al. 2015
NK-rich protein	Liao et al. 2015
NMP238	Clark et al. 2010
Non-neuronal cytoplasmic intermediate filament protein	Sun et al. 2015
notch protein	Sun et al. 2015
NPY	Clark et al. 2010
NPY-like	Clark et al. 2010
NPYR	Clark et al. 2010
nucleoside diphosphate kinase	Jackson et al. 2010
osteocalcin	Clark et al. 2010
Osteonectin	Clark et al. 2010
osteopontin (SPP1)	Clark et al. 2010
Oxytocin	Clark et al. 2010
OxytocinR	Clark et al. 2010
PAC1aR	Clark et al. 2010
PAC1bR	Clark et al. 2010
PAC1R	Clark et al. 2010
PACAP	Clark et al. 2010
pacap1	Clark et al. 2010
pacap2	Clark et al. 2010
PACAPA	Clark et al. 2010
PACAPB	Clark et al. 2010
PACAP-like	Clark et al. 2010
Paired Box 1	Clark et al. 2010
Pancreatic lipase-related protein 1	Sun et al. 2015
Papilin - Kunitz/Bovine trypsin inhibitor	Jackson et al. 2010
paraplegin(SPG7)	Clark et al. 2010
Parathyroid hormone receptor 3	Shi et al. 2013b
Parathyroid hormone/parathyroid hormone-related peptide receptor	Sun et al. 2015
PDFR-pigment dispersing factor receptor	Clark et al. 2010
PDGFA	Clark et al. 2010
PDGFRbeta2	Clark et al. 2010
PDZ-domain containing protein	Liao et al. 2015
Pearlin	Shi et al. 2013b
Peptide Deformylase, Mitochondrial	Clark et al. 2010
peptidoglycan recognition protein S1	Jackson et al. 2010
Peptidoglycan recognition protein S1S	Zhao et al. 2012
Peptidoglycan recognition protein S3	Zhao et al. 2012
Peptidylprolyl isomerase	Jackson et al. 2010
peritrophic membrane Chitin Binding Protein putative	Fang et al. 2011
Perlihibin	Jackson et al. 2010
Perline matrix protein	Joubert et al. 2010
Perlucin	Joubert et al. 2010; Zhao et al. 2012; Shi et al. 2013a; Liao et al. 2015; Sun et al. 2015; Bjärnmark et al. 2016
Perlucin (C-type lectin)	Jackson et al. 2010
perlucin 1	Deng et al. 2014
perlucin 4	Zhao et al. 2012; Deng et al. 2014
perlucin 5	Zhao et al. 2012; Deng et al. 2014
perlucin 6	Zhao et al. 2012; Deng et al. 2014
Perlucin-7	Joubert et al. 2010
Perlucin-like protein	Liao et al. 2015; Bjärnmark et al. 2016
Perlucin-like protein isoform A	Zhao et al. 2012; Sun et al. 2015
Perlustrin	Joubert et al. 2010
Perlwapin	Bjärnmark et al. 2016 Deng et al. 2014 Joubert et al. 2010
Perlwapin-like protein	Liao et al. 2015; Bjärnmark et al. 2016
Peroxinectin	Zhao et al. 2012
pfGbeta1	Joubert et al. 2010
Phosphate Regulating Endopeptidase Homolog X-Linked	Clark et al. 2010
Phosphatidic acid phosphatase type 2A	Zhao et al. 2012
Phosphatidic acid phosphatase type 2B-like	Zhao et al. 2012
phospholipase A2	Clark et al. 2010
PIF	Shi et al. 2013b; Deng et al. 2014; Sleight et al. 2016
Pif 177	Joubert et al. 2010
Pif80/pif97	Zhao et al. 2012
Plasma membrane calcium ATPase	Shi et al. 2013b; Joubert et al. 2010
Plasma membrane calcium-transporting ATPase 3	Sun et al. 2015
plectoxin VIII	Jackson et al. 2010
plexin domain-containing protein 2-like	Sun et al. 2015
PMMG1	Joubert et al. 2010
Polyubiquitin	Zhao et al. 2012
pontin	Clark et al. 2010
Prisilkin-39	Joubert et al. 2010; Zhao et al. 2012; Shi et al. 2013a; Deng et al. 2014; Liao et al. 2015; Bjärnmark et al. 2016
Prismalin-14	Joubert et al. 2010; Deng et al. 2014 ; Liao et al. 2015; Bjärnmark et al. 2016
Prismin_2	Joubert et al. 2010
Protease inhibitor	Jackson et al. 2010
protease inhibitor-like protein-A	Liao et al. 2015
protease inhibitor-like protein-B1	Liao et al. 2015
protease inhibitor-like protein-B2	Liao et al. 2015
protease inhibitor-like protein-B3	Liao et al. 2015
protease inhibitor-like protein-C	Liao et al. 2015
protease inhibitor-like protein-D1	Liao et al. 2015
protease inhibitor-like protein-D2	Liao et al. 2015
protein (pfp-16)	Joubert et al. 2010
protein disulfide isomerase	Jackson et al. 2010
Protein disulfide-isomerase A3	Sun et al. 2015
protein MPP1	Joubert et al. 2010
protein pfp-16	Joubert et al. 2010
protein pitchfork	Deng et al. 2014
protein serine/threonin kinase	Jackson et al. 2010
protein:MSI25	Joubert et al. 2010
Proteoglycan	Jackson et al. 2010
Prothrombin	Zhao et al. 2012
prothrombinase FGL2	Zhao et al. 2012
Protocadherin-11 X-linked	Sun et al. 2015
Proto-oncogene protein c-Fos	Clark et al. 2010
PRP	Clark et al. 2010
PTH	Clark et al. 2010
PTH1	Clark et al. 2010
PTH2	Clark et al. 2010
PTH-L	Clark et al. 2010
PTHLH	Clark et al. 2010
PTHR1	Clark et al. 2010
PTHR2	Clark et al. 2010
PTHR3	Clark et al. 2010
PTHR-like	Clark et al. 2010
PTHrP	Clark et al. 2010
PTHrPA	Clark et al. 2010
PTHrPB	Clark et al. 2010
PTSP-like peptide neurotransmitter precursor	Sun et al. 2015
PUSP1	Liao et al. 2015
Receptor Activity Modifying Protein 1	Clark et al. 2010
Receptor Activity Modifying Protein 2a	Clark et al. 2010
Receptor Activity Modifying Protein 2b	Clark et al. 2010
Receptor Activity Modifying Protein 3	Clark et al. 2010
Receptor Activity Modifying Protein 3 mRNA for receptor activity modifying	Clark et al. 2010
Receptor Activity Modifying Protein 3 splice	Clark et al. 2010
Receptor Activity Modifying Protein 4	Clark et al. 2010
Receptor Activity Modifying Protein 5	Clark et al. 2010
receptor tyrosine kinase Kdr	Clark et al. 2010
Receptor-type tyrosine-protein phosphatase kappa	Sun et al. 2015
Regucalcin	Shi et al. 2013b; Liao et al. 2015; Sun et al. 2015; Bjärnmark et al. 2016
retinoblastoma binding protein 6	Clark et al. 2010
retinoblastoma binding protein 6-like (rbbp6l)	Clark et al. 2010
Rhamnose-binding lectin (SAL)	Jackson et al. 2010; Zhao et al. 2012
ribonuclease-like protein	Liao et al. 2015
Ribose-phosphate pyrophosphokinase	Jackson et al. 2010
RS-rich protein-1	Liao et al. 2015
RS-rich protein-2	Liao et al. 2015
Runt Related Transcription Factor 2	Clark et al. 2010
RUNX2b	Clark et al. 2010
RUNX2transcriptvariant3	Clark et al. 2010
S100 calcium binding protein	Clark et al. 2010
S100A13	Clark et al. 2010
Salivary acidic proline-rich phosphoprotein 1/2[Homo sapiens]	Deng et al. 2014
Salivary C-type lectin	Zhao et al. 2012
sarco/endoplasmatic reticulum calcium ATPase isoform A	Joubert et al. 2010
sarcoplasmic calcium-binding protein	Joubert et al. 2010; Shi et al. 2013a; Sun et al. 2015
Sarcoplasmic calcium-binding proteins II, V, VI, and VII	Sun et al. 2015
Sarcoplasmic/endoplasmic reticulum calcium ATPase Isoform C	Shi et al. 2013b
Scavenger receptor class B, member 1-like protein	Zhao et al. 2012
scavenger receptor class B, member 2, isoform CRA_b	Zhao et al. 2012
Scavenger receptor class B, member 2-like	Zhao et al. 2012
Scavenger receptor class F member 2	Zhao et al. 2012
Scavenger receptor class F member 2-like	Zhao et al. 2012
Scavenger receptor class F, member 1	Zhao et al. 2012
Scavenger receptor cysteine-rich domain-containing protein LOC284297 homolog	Zhao et al. 2012
Scavenger receptor cysteine-rich protein	Zhao et al. 2012
Scavenger receptor cysteine-rich protein type 12	Zhao et al. 2012
Scavenger receptor cysteine-rich protein type 12-like, partial	Zhao et al. 2012
Scavenger receptor cysteine-rich protein, SRCRB-S4D	Zhao et al. 2012
Scavenger receptor Cysteine-rich type 1 protein M130x	Zhao et al. 2012
Scavenger receptor SR-C-like protein	Zhao et al. 2012
SCO-spondin	Sun et al. 2015
SCO-spondin like	Sun et al. 2015
SCTR	Clark et al. 2010
SCTR PAC1aR PAC1 GLPR	Clark et al. 2010
SD-rich protein	Liao et al. 2015
Secreted acid phosphatase 2 (SAP2)	Zhao et al. 2012
Secreted frizzled-related protein 5	Sun et al. 2015
Secreted Phosphoprotein 1	Clark et al. 2010
Serine protease inhibitor 1	Jackson et al. 2010
Serine protease inhibitor 2	Jackson et al. 2010
Serum lectin isoform 3	Zhao et al. 2012
Shell matrix protein	Shi et al. 2013a; Deng et al. 2014; Liao et al. 2015; Bjärnmark et al. 2016
Shematrin	Jackson et al. 2010; Zhao et al. 2012; Deng et al. 2014; Bjärnmark et al. 2016
Shematrin 2	Zhao et al. 2012; Shi et al. 2013a; Shi et al. 2013b; Deng et al. 2014
Shematrin-1	Joubert et al. 2010; Shi et al. 2013b; Deng et al. 2014; Liao et al. 2015
Shematrin-3	Joubert et al. 2010; Shi et al. 2013b; Deng et al. 2014; Liao et al. 2015
Shematrin-4	Joubert et al. 2010; Deng et al. 2014
Shematrin-5	Shi et al. 2013b; Joubert et al. 2010; Deng et al. 2014
Shematrin-6	Joubert et al. 2010; Shi et al. 2013b; Deng et al. 2014
shematrin-7	Joubert et al. 2010; Deng et al. 2014
Shematrin-8	Joubert et al. 2010; Deng et al. 2014
shematrin-9	Joubert et al. 2010; Deng et al. 2014; Liao et al. 2015
Shematrin-like protein 1	Liao et al. 2015
Shematrin-like protein 2	Deng et al. 2014; Liao et al. 2015
Sialic acid binding lectin	Jackson et al. 2010; Fang et al. 2011; Zhao et al. 2012
Sialic acid-binding Ig-like lectin 10-like	Sun et al. 2015
Sialic acid-binding Ig-like lectin 2	Sun et al. 2015
signal sequence receptor protein	Jackson et al. 2010
Signal Transducer And Activator Of Transcription 1	Clark et al. 2010
Signal Transducer And Activator Of Transcription 1-alpha	Clark et al. 2010
Signal Transducer And Activator Of Transcription 3	Clark et al. 2010
Signal Transducer And Activator Of Transcription 4	Clark et al. 2010
similar to calcium and integrin binding protein CIB	Shi et al. 2013b
similar to collagen	Jackson et al. 2010
similar to scavenger receptor SR-C-like protein; protein TcasGA2_TC015640	Sun et al. 2015
SKD-rich protein	Liao et al. 2015
SKP-rich protein	Liao et al. 2015
SK-rich protein	Liao et al. 2015
SL-rich protein	Liao et al. 2015
Small heat shock protein	Zhao et al. 2012
smoothened	Sun et al. 2015
SNK-rich protein	Liao et al. 2015
Sodium channel protein type 5 subunit alpha	Sun et al. 2015
sodium/calcium exchanger	Clark et al. 2010
Sodium/calcium exchanger 2	Shi et al. 2013b; Sun et al. 2015
Sodium/calcium exchanger 3	Sun et al. 2015
Sodium-dependent glucose transporter 1	Sun et al. 2015
sodium-phosphate cotransporter	Clark et al. 2010
Solute carrier family 22	Jackson et al. 2010
Solute Carrier Family 22 Member 16	Clark et al. 2010
Solute Carrier Family 6 Member 8	Clark et al. 2010
soma ferritin	Fang et al. 2011
SP1 Transcription Factor	Clark et al. 2010
SP3 Transcription Factor	Clark et al. 2010
Sp7 Transcription Factor	Clark et al. 2010
SPARC	Clark et al. 2010
SPARCL1	Clark et al. 2010
SPTR-like prohormone	Jackson et al. 2010
SRY-Box 17	Clark et al. 2010
SRY-Box 14a	Clark et al. 2010
SRY-Box 1a	Clark et al. 2010
SRY-Box 3	Clark et al. 2010
SRY-Box 5 transcriptvariant3	Clark et al. 2010
SRY-Box 6 transcriptvariant1	Clark et al. 2010
SRY-Box 6a	Clark et al. 2010
SRY-Box 8	Clark et al. 2010
SRY-Box 9	Clark et al. 2010
SRY-Box 9b	Clark et al. 2010
Stanniocalcin 1	Clark et al. 2010
Stanniocalcin 2	Clark et al. 2010
Superoxide dismutase	Zhao et al. 2012
Superoxide dismutase copper chaperone	Zhao et al. 2012
Superoxide dismutase-like	Zhao et al. 2012
sushi-like protein	Liao et al. 2015
Synaptotagmin-12	Sun et al. 2015
tectonic-3-like	Sun et al. 2015
Telomerase protein component 1	Sun et al. 2015
tenascin-C	Clark et al. 2010
tenascinN(TNN)	Clark et al. 2010
tenascinR	Clark et al. 2010
tenascinW	Clark et al. 2010
Tenascin-X	Clark et al. 2010; Sun et al. 2015
Terribly reduced optic lobes	Jackson et al. 2010
Tetraodon full-lenght cDNA	Clark et al. 2010
TFG beta signaling pathway factor	Joubert et al. 2010
Theromacin	Jackson et al. 2010
Thrombospondin 1	Clark et al. 2010
Thrombospondin_2 (THSB2)	Clark et al. 2010
Thrombospondin_3(THSB3)	Clark et al. 2010
Thrombospondin_4(THSB4)	Clark et al. 2010
tick adams, partial	Sun et al. 2015
TIMP Metallopeptidase Inhibitor	Jackson et al. 2010; Clark et al. 2010
TIP39	Clark et al. 2010
TNF Receptor Associated Factor 6	Clark et al. 2010
Toll receptor	Zhao et al. 2012
Toll-like receptor	Zhao et al. 2012
Toll-like receptor 1	Zhao et al. 2012
Toll-like receptor 11-like	Zhao et al. 2012
Toll-like receptor 12-like	Zhao et al. 2012
Toll-like receptor 13	Zhao et al. 2012
Toll-like receptor 2	Zhao et al. 2012
Toll-like receptor 20f isoform 1	Zhao et al. 2012
Toll-like receptor 22	Zhao et al. 2012
Toll-like receptor 3	Zhao et al. 2012
Toll-like receptor 3-like	Zhao et al. 2012
Toll-like receptor 4	Zhao et al. 2012
Toll-like receptor 6	Zhao et al. 2012
Toll-like receptor 6-like	Zhao et al. 2012
Toll-like receptor 7	Zhao et al. 2012
Toll-like receptor 7-like	Zhao et al. 2012
Toll-like receptor 8-like	Zhao et al. 2012
Toll-like receptor b	Zhao et al. 2012
TP-rich protein	Liao et al. 2015
TRAF family member-associated NF-kB activator	Clark et al. 2010
Transforming Growth Factor Alpha	Clark et al. 2010
Transforming Growth Factor Beta 1	Clark et al. 2010
Transforming Growth Factor Beta 2	Clark et al. 2010
Transforming Growth Factor Beta Induced	Clark et al. 2010
Transgelin	Bjärnmark et al. 2016
Transgelin-2	Liao et al. 2015; Bjärnmark et al. 2016
Transgelin-like protein-1	Liao et al. 2015
Transgelin-like protein-2	Liao et al. 2015
Transgelin-like protein-3	Liao et al. 2015
Transient Receptor Potential Cation Channel Subfamily V Member 6	Clark et al. 2010
Transmembrane 9 superfamily member 1-like	Sun et al. 2015
Transmembrane emp24 protein	Jackson et al. 2010
Troponin C	Shi et al. 2013a; Sun et al. 2015
twitchin-like protein-1	Liao et al. 2015
twitchin-like protein-2	Liao et al. 2015
type II Na/Pi cotransport system protein	Clark et al. 2010
Tyrosinase	Joubert et al. 2010; Zhao et al. 2012; Sleight et al. 2016
tyrosinase 4	Deng et al. 2014
Tyrosinase family member (tyr-2)	Zhao et al. 2012; Deng et al. 2014
tyrosinase-like protein	Jackson et al. 2010; Zhao et al. 2012; Shi et al. 2013a; Deng et al. 2014; Liao et al. 2015
Tyrosinase-like protein 1	Clark et al. 2010; Zhao et al. 2012; Shi et al. 2013a; Deng et al. 2014; Sun et al. 2015
Tyrosinase-like protein 3	Zhao et al. 2012; Shi et al. 2013a; Deng et al. 2014; Sun et al. 2015
tyrosine phosphatase	Jackson et al. 2010; Sun et al. 2015
Ubiquitin C	Zhao et al. 2012
Uncharacterized protein F18	Joubert et al. 2010; Bjärnmark et al. 2016
uncharacterized protein LOC579730	Sun et al. 2015
Uncharacterized shell protein 1	Liao et al. 2015; Bjärnmark et al. 2016
Uncharacterized shell protein 26	Liao et al. 2015; Bjärnmark et al. 2016
unnamed protein product (Trypanosoma congolense IL3000)	Sun et al. 2015
Vascular Endothelial Growth Factor A	Clark et al. 2010
Vasoactive Intestinal Peptide Receptor 1	Clark et al. 2010
Vasoactive Intestinal Peptide Receptor 2	Clark et al. 2010
Vasopressin	Clark et al. 2010
Veliger mantle 1	Joubert et al. 2010
Venom acid phosphatase	Zhao et al. 2012
Venom C-type lectin mannose binding isoform 3	Zhao et al. 2012
versican(CSPG2)	Clark et al. 2010
Vesicular mannose-binding lectin	Zhao et al. 2012
vitronectin	Clark et al. 2010
Voltage-dependent calcium channel subunit alpha-2/delta-2	Sun et al. 2015
Voltage-dependent calcium channel subunit alpha-2/delta-3	Sun et al. 2015
Voltage-dependent L-type calcium channel alpha subunit	Joubert et al. 2010; Shi et al. 2013a; Sun et al. 2015
Voltage-dependent L-type calcium channel subunit beta-2	Sun et al. 2015
VPK-rich protein	Liao et al. 2015
Whirlin-like protein	Liao et al. 2015
zinc finger protein 845-like	Sun et al. 2015
Jackson, D.J., McDougall, C., Woodcroft, B., Moase, P., Rose, R.A., Kube, M., et al. (2010). Parallel evolution of nacre building gene sets in molluscs. Molecular Biology and Evololution, 27, 591–608.
