# Supplementary material for: Mantle transcriptome sequencing of Mytilus spp. and identification of putative biomineralization genes
Source: PeerJ. 2019 Jan 14;6:e6245. doi: 10.7717/peerj.6245 (PMC6359903; doi:10.7717/peerj.6245)
Supplement: Supplemental Information 11 [file peerj-07-6245-s011.xlsx]

## Sheet: Arkusz1
Groups	EduN	TroV	GalM	GalT	Chil
Number of single-end reads	202,056	110,374	298,520	80,236	61,949
Average read length	334.3	350.505	364.265	339.749	335.871
Total clean reads	199,152	108,979	295,490	79,190	60,962
Total bases (bp)	67,369,093	38,594,140	108,557,617	27,194,393	20,746,783
Assembled bases (bp)	53,899,612	29,062,836	102,419,375	22,439,642	16,632,917
Number of contigs	8,333	3,667	3,599	3,050	2,333
N50	600	523	513	552	495
% MBTC*	0.8132	0.7673	0.9371	0.8228	0.7946
GC content	0.352	0.355	0.373	0.352	0.368
Annotation (NCBI NR database)	3,848 (46.17%)	1,584 (43.19%)	1,878 (52.18%)	1,360 (44.59%)	1,103 (47.28%)
KEGG	1,299 (15.55%)	607 (16.55%)	726 (20.72%)	550 (18.03%)	497 (21.30%)
GO	3,158 (37.89%)	1,219 (33.24%)	1,565 (43.48%)	1,151 (37.73%)	731 (31.33%)
* percentage of sequences mapped back to contigs
