# Supplementary material for: Mantle transcriptome sequencing of Mytilus spp. and identification of putative biomineralization genes
Source: PeerJ. 2019 Jan 14;6:e6245. doi: 10.7717/peerj.6245 (PMC6359903; doi:10.7717/peerj.6245)
Supplement: Supplemental Information 12 [file peerj-07-6245-s012.xlsx]

## Sheet: Arkusz1
Contig Name	Description	KEGG IDs	GO IDs
EduN_1	innexin unc-9-like isoform X2		C:GO:0005921; P:GO:0006811; C:GO:0016021; C:GO:0005886
EduN_10	---NA---
EduN_100	ribosomal rpl10	K02866	F:GO:0005524; F:GO:0003735; P:GO:0051298; P:GO:0002181; P:GO:0019233; C:GO:0022625; C:GO:0043025; P:GO:0000027
EduN_1000	---NA---
EduN_1001	ankyrin-2-like isoform X7	K10380	P:GO:0007165
EduN_1002	---NA---
EduN_1003	cAMP-dependent kinase regulatory subunit		P:GO:0016310; F:GO:0016301
EduN_1004	collagen alpha-1(XII) chain-like isoform X1	K06238	C:GO:0005581; C:GO:0016020; C:GO:0016021
EduN_1005	---NA---
EduN_1006	kinesin KIF28P		F:GO:0000166; F:GO:0016887; F:GO:0003777; P:GO:0030705; C:GO:0005871; P:GO:0007018
EduN_1007	cytochrome P450	K17689	F:GO:0005506; F:GO:0016705; C:GO:0016021; P:GO:0055114; F:GO:0004497; F:GO:0020037
EduN_1008	tumor necrosis factor receptor superfamily member 27-like		P:GO:0007165; C:GO:0016020; C:GO:0016021
EduN_1009	---NA---
EduN_101	MAM domain-containing glycosylphosphatidylinositol anchor 2-like		P:GO:0008045; C:GO:0016020; C:GO:0016021
EduN_1010	---NA---
EduN_1011	E3 ubiquitin- ligase RNF19A		F:GO:0008270; F:GO:0061630; P:GO:0000209; F:GO:0008134; P:GO:0000226; P:GO:0042787; C:GO:0005813; F:GO:0031624; C:GO:0000151; C:GO:0016021; C:GO:0005829; P:GO:0032436; F:GO:0016874
EduN_1012	coiled-coil domain-containing 60-like isoform X1
EduN_1013	Peptidyl-prolyl cis-trans isomerase		F:GO:0003755; P:GO:0000413; P:GO:0006457
EduN_1014	---NA---
EduN_1015	---NA---
EduN_1016	---NA---
EduN_1017	---NA---
EduN_1018	---NA---
EduN_1019	60 kDa SS-A Ro ribonucleo	K11089	F:GO:0003723; C:GO:0044424; P:GO:0044699
EduN_102	---NA---
EduN_1020	---NA---
EduN_1021	---NA---
EduN_1022	Dynein heavy chain axonemal	K10408	F:GO:0016887; F:GO:0005524; F:GO:0003777; C:GO:0005858; P:GO:0001539; P:GO:0007018
EduN_1023	---NA---
EduN_1024	---NA---
EduN_1025	---NA---
EduN_1026	Tyrosine- phosphatase Lar-like		C:GO:0005581; P:GO:0006470; F:GO:0008289; P:GO:0042157; C:GO:0005576; P:GO:0006869; F:GO:0004721; F:GO:0004725; F:GO:0005509; C:GO:0016020; C:GO:0016021; F:GO:0016791; P:GO:0016311; P:GO:0035335; F:GO:0016787
EduN_1027	---NA---
EduN_1028	sodium- and chloride-dependent glycine transporter 1-like isoform X5		P:GO:0006836; F:GO:0005328; P:GO:0055085; C:GO:0016021
EduN_1029	---NA---
EduN_103	tubulin alpha-3 chain-like	K07374	F:GO:0005525; C:GO:0005737; F:GO:0003924; F:GO:0005200; C:GO:0005874; P:GO:0007017
EduN_1030	---NA---
EduN_1031	---NA---
EduN_1032	centrosomal of 290 kDa-like		C:GO:0043229
EduN_1033	B-cell receptor CD22-like		F:GO:0005509
EduN_1034	---NA---
EduN_1035	---NA---
EduN_1036	major vault -like		C:GO:0005634; C:GO:0030529; C:GO:0005737
EduN_1037	high affinity copper uptake 1-like		C:GO:0016020; C:GO:0016021; F:GO:0005375; P:GO:0035434
EduN_1038	inhibitor of apoptosis	K16060	F:GO:0008270; F:GO:0046872
EduN_1039	---NA---
EduN_104	tubulin alpha-3 chain	K07374	F:GO:0005525; C:GO:0005737; F:GO:0003924; F:GO:0005200; C:GO:0005874; P:GO:0007017
EduN_1040	PREDICTED: uncharacterized protein LOC105326797		F:GO:0003676; F:GO:0046872; C:GO:0005739; F:GO:0052856; F:GO:0052857
EduN_1041	---NA---
EduN_1042	---NA---
EduN_1043	PREDICTED: uncharacterized protein LOC105344193 isoform X1		P:GO:0007165
EduN_1044	pyrroline-5-carboxylate reductase 2-like		P:GO:0008652
EduN_1045	cyclic nucleotide-binding domain-containing 2-like
EduN_1046	---NA---
EduN_1047	nuclear factor NF-kappa-B p105 subunit-like isoform X1	K02580	P:GO:0034097; P:GO:0007165; F:GO:0000975; F:GO:0043565; P:GO:1901699; P:GO:1901701; P:GO:0006357; C:GO:0005634; P:GO:0010629; F:GO:0003700; P:GO:0031327; F:GO:0005515; C:GO:0005737; P:GO:0045893; P:GO:0010558; P:GO:0071407
EduN_1048	---NA---
EduN_1049	major egg antigen-like
EduN_105	60S ribosomal L6-like	K02934	F:GO:0003735; P:GO:0002181; C:GO:0022625; P:GO:0000027
EduN_1050	minor histocompatibility antigen H13 isoform X2		F:GO:0004190; P:GO:0006508; C:GO:0016021; P:GO:0043523
EduN_1051	b(0,+)-type amino acid transporter 1-like isoform X3	K13868	C:GO:0005887; F:GO:0015179; P:GO:1902475; F:GO:0015297
EduN_1052	proliferation-associated 2G4-like		C:GO:0005737
EduN_1053	Protocadherin Fat 4	K20996	P:GO:0009790; P:GO:0021515; P:GO:0045595; P:GO:0030182; C:GO:0016020; P:GO:0007389; P:GO:0072359; P:GO:0009653; P:GO:0009888; P:GO:2000026
EduN_1054	adenylate kinase 7	K00939	P:GO:0016310; F:GO:0019205; P:GO:0006139
EduN_1055	---NA---
EduN_1056	---NA---
EduN_1057	very low-density lipo receptor-like isoform X2	K03068	P:GO:0021915; C:GO:1990909; F:GO:0071936; P:GO:0034392; P:GO:0044332; P:GO:0045787; C:GO:0005794; P:GO:0044335; P:GO:1904953; C:GO:0005576; P:GO:0045944; P:GO:0051091; C:GO:0005901; F:GO:0005109; P:GO:0030900; P:GO:0044340; P:GO:0071397; P:GO:2000055; F:GO:0017147; F:GO:0042803; F:GO:0005041; P:GO:0090263; P:GO:1904886; P:GO:0006897; C:GO:0009986; P:GO:0009887; C:GO:0031901; P:GO:0090090; C:GO:19…
EduN_1058	myosin heavy chain	K10352	F:GO:0005524; F:GO:0005516; F:GO:0003779; P:GO:0008152; C:GO:0032982; F:GO:0016597; C:GO:0030016; F:GO:0003774
EduN_1059	C2orf81 like
EduN_106	tubulin alpha partial	K07374	F:GO:0005525; C:GO:0005737; F:GO:0003924; C:GO:0016021; F:GO:0005200; C:GO:0005874; P:GO:0007017
EduN_1060	PREDICTED: uncharacterized protein C2orf81 homolog
EduN_1061	muscle M-line assembly unc-89-like isoform X4	K12567
EduN_1062	RNA-binding lark-like		F:GO:0097159; F:GO:1901363; F:GO:0046872
EduN_1063	glutamine-rich 2-like isoform X4
EduN_1064	universal stress A		P:GO:0006950
EduN_1065	LPS-induced TNF-alpha factor	K19363	C:GO:0016021
EduN_1066	N- partial		F:GO:0003676; P:GO:0090305; F:GO:0004527; C:GO:0016020; C:GO:0016021
EduN_1067	---NA---
EduN_1068	---NA---
EduN_1069	---NA---
EduN_107	disintegrin and metallo ase domain-containing 10-like	K06704	F:GO:0008270; P:GO:0007229; P:GO:0007219; P:GO:0006509; C:GO:0016021; F:GO:0004222
EduN_1070	---NA---
EduN_1071	actin 2	K05692	F:GO:0005524; C:GO:0005856; C:GO:0005737
EduN_1072	---NA---
EduN_1073	---NA---
EduN_1074	Leucine-rich repeat-containing 48
EduN_1075	---NA---
EduN_1076	BAT2 domain-containing 1
EduN_1077	pre-mRNA 3 -end-processing factor FIP1-like isoform X2	K14405
EduN_1078	hypothetical protein CGI_10015914		P:GO:0006869; F:GO:0005319; C:GO:0016020; C:GO:0016021
EduN_1079	---NA---
EduN_108	WD repeat-containing KIAA1875-like isoform X1
EduN_1080	---NA---
EduN_1081	UNKNOWN
EduN_1082	---NA---
EduN_1083	---NA---
EduN_1084	---NA---
EduN_1085	transcription elongation factor B polypeptide 1	K03872	F:GO:0003746; P:GO:0006414; P:GO:0006511
EduN_1086	dynein light chain roadblock-type 2		C:GO:0005868; P:GO:0007018
EduN_1087	ATP synthase subunit mitochondrial	K02130	C:GO:0005739; P:GO:0044699
EduN_1088	radial spoke head 1 homolog
EduN_1089	Angiotensin-converting enzyme	K01283	F:GO:0008233
EduN_109	EF-hand domain-containing 1		F:GO:0005509
EduN_1090	---NA---
EduN_1091	UDP-N-acetylglucosamine--peptide N-acetylglucosaminyltransferase 110 kDa subunit-like isoform X2	K09667
EduN_1092	ankyrin repeat domain-containing 45-like
EduN_1093	---NA---
EduN_1094	---NA---
EduN_1095	---NA---
EduN_1096	---NA---
EduN_1097	cdc42 homolog	K04393	F:GO:0005525; P:GO:0007264; P:GO:0044763; P:GO:0048518; C:GO:0005622; P:GO:0051128
EduN_1098	---NA---
EduN_1099	byssal tyrosinase -1 precursor		F:GO:0016491; F:GO:0046872; P:GO:0055114
EduN_11	PREDICTED: tubulin beta chain [Merops nubicus]	K07375	C:GO:0043209; F:GO:0005200; F:GO:0042288; F:GO:0051082; P:GO:0042267; C:GO:0005874; P:GO:0007017; F:GO:0005525; C:GO:0005634; C:GO:0070062; P:GO:0000086; F:GO:0003725; P:GO:0006928; F:GO:0003924; C:GO:0005829
EduN_110	---NA---
EduN_1100	33 kDa inner dynein arm light axonemal	K10410	C:GO:0030286; F:GO:0003774
EduN_1101	---NA---
EduN_1102	---NA---
EduN_1103	calponin -1
EduN_1104	---NA---
EduN_1105	TRAF3-interacting 1-like isoform X2		F:GO:0008017
EduN_1106	neurogenic locus Notch -like	K02599	C:GO:0016020; P:GO:0050789; P:GO:0009987; P:GO:0044767
EduN_1107	---NA---
EduN_1108	homeobox Mohawk-like
EduN_1109	---NA---
EduN_111	aconitate mitochondrial-like	K01681	F:GO:0046872; C:GO:0005739; P:GO:0006099; F:GO:0051539; F:GO:0003994
EduN_1110	dynein heavy chain axonemal-like	K10408	C:GO:0036156; F:GO:0005524; F:GO:0003777; C:GO:0005737; F:GO:0005509; P:GO:0007018
EduN_1111	Cytadherence high molecular weight 2		F:GO:0008061; P:GO:0006030; C:GO:0016021; C:GO:0005576
EduN_1112	hypothetical protein LOTGIDRAFT_229985
EduN_1113	---NA---
EduN_1114	---NA---
EduN_1115	split ends-like		P:GO:0000122; C:GO:0070062; F:GO:0003723; F:GO:0001085; C:GO:0017053; F:GO:0001191; P:GO:0050769; C:GO:0005654; P:GO:0000398
EduN_1116	---NA---
EduN_1117	leucine-rich repeat-containing 45		F:GO:0005525; C:GO:0005856; P:GO:0007264; C:GO:0005622
EduN_1118	---NA---
EduN_1119	---NA---
EduN_112	E3 ubiquitin- ligase TRAF7-like isoform X1		F:GO:0004842; F:GO:0008270; F:GO:0016874; P:GO:0016567
EduN_1120	galectin 2		F:GO:0030246
EduN_1121	---NA---
EduN_1122	---NA---
EduN_1123	centrosomal of 170 kDa B-like isoform X11
EduN_1124	---NA---
EduN_1125	AN1-type zinc finger 4-like		F:GO:0008270
EduN_1126	DNA-directed RNA polymerase II subunit RPB1
EduN_1127	---NA---
EduN_1128	phosphatase 2A regulatory subunit partial	K03456	F:GO:0003676; F:GO:0008408; P:GO:0090305; P:GO:0006461
EduN_1129	Serine threonine- phosphatase 2A 65 kDa regulatory subunit A alpha isoform	K03456	F:GO:0003676; F:GO:0008408; P:GO:0090305; P:GO:0006461
EduN_113	---NA---
EduN_1130	---NA---
EduN_1131	elongation factor 1-gamma-like	K03233	C:GO:0005634; F:GO:0003746; C:GO:0005737; P:GO:0006749; F:GO:0004364; P:GO:0006412
EduN_1132	---NA---
EduN_1133	---NA---
EduN_1134	---NA---
EduN_1135	---NA---
EduN_1136	Selenium-binding 1- partial		F:GO:0008430
EduN_1137	---NA---
EduN_1138	---NA---
EduN_1139	von Willebrand factor type EGF and pentraxin domain-containing 1-like		F:GO:0016491; F:GO:0005509; P:GO:0055114; F:GO:0030246
EduN_114	---NA---
EduN_1140	matrix metalloproteinase-14-like		F:GO:0016787
EduN_1141	transcription elongation regulator 1 isoform X1	K12824
EduN_1142	PREDICTED: sushi, von Willebrand factor type A, EGF and pentraxin domain-containing protein 1-like, partial [Crassostrea gigas]		F:GO:0005509
EduN_1143	cytochrome b-c1 complex subunit mitochondrial	K00415	C:GO:0043231
EduN_1144	---NA---
EduN_1145	GTPase IMAP family member 4-like		F:GO:0046872
EduN_1146	hemocyte -glutamine gamma-glutamyltransferase-like		F:GO:0003810; F:GO:0046872; P:GO:0018149
EduN_1147	Sodium- and chloride-dependent glycine transporter 2		C:GO:0016021; F:GO:0015370; P:GO:0044765
EduN_1148	---NA---
EduN_1149	dynein heavy chain axonemal-like	K10408	F:GO:0016887; F:GO:0005524; F:GO:0003777; F:GO:0003779; C:GO:0030286; P:GO:0016310; P:GO:0007018; F:GO:0016301
EduN_115	---NA---
EduN_1150	elongation factor 1-beta		C:GO:0044444; P:GO:0006412
EduN_1151	cdc42 homolog	K04513	P:GO:0043549; P:GO:0022607; P:GO:0007015; C:GO:0000139; C:GO:0043025; P:GO:0042059; F:GO:0034191; C:GO:0005789; P:GO:0051489; P:GO:0072384; P:GO:0030307; P:GO:0001942; P:GO:0051683; F:GO:0003924; C:GO:0005829; F:GO:0031996; P:GO:0051647; P:GO:0030225; F:GO:0019901; P:GO:0031274; P:GO:0048646; P:GO:1900026; C:GO:0005886; P:GO:0030216; P:GO:0048010; P:GO:0048730; P:GO:0051056; P:GO:0048013; P:GO:00…
EduN_1152	axonemal dynein light chain domain-containing 1-like isoform X2		F:GO:0046872
EduN_1153	nucleolar GTP-binding 1	K06943	P:GO:0033342; P:GO:0008285; P:GO:0022408; P:GO:0042254; C:GO:0005794; P:GO:0008156; C:GO:0005730; P:GO:0000079; F:GO:0005525; C:GO:0031965; C:GO:0048471; F:GO:0003924; P:GO:0001649; P:GO:0031397; P:GO:0050821; P:GO:0030336
EduN_1154	src kinase-associated phospho 2	K17699	F:GO:0005070; C:GO:0005737; P:GO:0002757; C:GO:0005886
EduN_1155	NAD-dependent deacylase sirtuin- mitochondrial		F:GO:0008270; P:GO:0036047; F:GO:0061697; F:GO:0036054; F:GO:0036055; P:GO:0006476; P:GO:0061699; C:GO:0005743; C:GO:0005634; C:GO:0005758; F:GO:0034979; C:GO:0005759; C:GO:0005829; P:GO:0010566; P:GO:0036049; F:GO:0070403; P:GO:2000378
EduN_1156	---NA---
EduN_1157	---NA---
EduN_1158	hypothetical protein dsmv_3640		C:GO:0016020; C:GO:0016021
EduN_1159	hypothetical protein
EduN_116	myosin heavy chain isoform partial	K17751	C:GO:0016459; F:GO:0005524; F:GO:0003774
EduN_1160	---NA---
EduN_1161	---NA---
EduN_1162	Translocon-associated subunit alpha	K13249	C:GO:0005789; C:GO:0016021
EduN_1163	hypothetical protein Csp_D29540		C:GO:0016021
EduN_1164	kelch 5		F:GO:0004842; C:GO:0031463; P:GO:0016567
EduN_1165	tektin-3-like isoform X1
EduN_1166	serine arginine-rich splicing factor 6-like isoform X2	K12893	F:GO:0000166; F:GO:0003676; F:GO:0016787
EduN_1167	ecdysone-induced isoforms C D-like isoform X1		F:GO:0005488
EduN_1168	transport Sec61 subunit gamma	K07342	P:GO:0071806; P:GO:0036498; F:GO:0005515; F:GO:0015450; C:GO:0030176; C:GO:0005829; P:GO:0045047
EduN_1169	---NA---
EduN_117	headcase		C:GO:0016020; C:GO:0016021
EduN_1170	serine threonine- kinase pim-1	K04702	P:GO:0008283; P:GO:0030097; F:GO:0043024; P:GO:0046777; P:GO:0043433; F:GO:0008134; F:GO:0004674; P:GO:0007634; P:GO:0031659; F:GO:0005524; P:GO:0048593; C:GO:0005737; P:GO:0043066; P:GO:0006915; P:GO:0070561; F:GO:0030145
EduN_1171	---NA---
EduN_1172	Poly [ADP-ribose] polymerase 14		F:GO:0016740
EduN_1173	---NA---
EduN_1174	---NA---
EduN_1175	mitochondria-eating -like isoform X2		P:GO:0035694; P:GO:0035695; P:GO:0033554; C:GO:0005741
EduN_1176	---NA---
EduN_1177	---NA---
EduN_1178	---NA---
EduN_1179	dolichyl-diphosphooligosaccharide-- glycosyltransferase subunit 2-like	K12667	C:GO:0008250; F:GO:0004579; C:GO:0016021; P:GO:0006487
EduN_118	---NA---
EduN_1180	---NA---
EduN_1181	clathrin heavy chain	K04646	P:GO:0016192; C:GO:0030130; C:GO:0030132; F:GO:0005198; P:GO:0006886
EduN_1182	PREDICTED: nidogen-2-like
EduN_1183	neurogenic locus notch homolog 3		F:GO:0004190; P:GO:0007219; P:GO:0007275; F:GO:0005509; C:GO:0016020; P:GO:0006508; C:GO:0016021; P:GO:0030154
EduN_1184	clustered mitochondria homolog		C:GO:0005737; P:GO:0048312; F:GO:0003729
EduN_1185	BTB POZ domain-containing 17-like isoform X2
EduN_1186	---NA---
EduN_1187	60S ribosomal L12-like	K02870	F:GO:0003735; C:GO:0022625; F:GO:0019843; P:GO:0000027; P:GO:0006412
EduN_1188	taurine transporter		P:GO:0006836; F:GO:0005328; P:GO:0055085; C:GO:0016021
EduN_1189	---NA---
EduN_119	tubulin alpha-4 chain- partial	K07374	F:GO:0005525; C:GO:0005737; F:GO:0003924; F:GO:0005200; C:GO:0005874; P:GO:0007017
EduN_1190	40S ribosomal S11	K02949	F:GO:0003735; C:GO:0022627; P:GO:0006351; F:GO:0046983; P:GO:0006412
EduN_1191	---NA---
EduN_1192	Tyrosine- kinase Abl		F:GO:0005524; C:GO:0016020; C:GO:0016021; F:GO:0004672; P:GO:0016310; P:GO:0006468; F:GO:0016301
EduN_1193	GTP-binding GEM-like		F:GO:0000166; P:GO:0007165; F:GO:0043167
EduN_1194	rRNA 2 -O-methyltransferase fibrillarin	K14563	C:GO:0031428; C:GO:0032040; F:GO:0008649; P:GO:0000494; F:GO:0003723; P:GO:1990258; F:GO:1990259; P:GO:0008033; C:GO:0015030; P:GO:0031167
EduN_1195	---NA---
EduN_1196	thioredoxin domain-containing 3 homolog isoform X5		C:GO:0005623; P:GO:0006228; P:GO:0006241; P:GO:0006183; P:GO:0006165; P:GO:0007155; P:GO:0045454; F:GO:0004550; F:GO:0030246
EduN_1197	hypothetical protein LOTGIDRAFT_162387		C:GO:0016020; C:GO:0016021; C:GO:0005576; P:GO:0009405; F:GO:0019855
EduN_1198	---NA---
EduN_1199	integrase core domain-containing		F:GO:0003676; P:GO:0015074
EduN_12	beta-tubulin [Pinctada fucata]	K07375	F:GO:0005525; C:GO:0005737; F:GO:0003924; F:GO:0005200; C:GO:0005874; P:GO:0007017
EduN_120	sushi, von Willebrand factor type A, EGF and pentraxin domain-containing protein 1-like [Crassostrea virginica]		F:GO:0005509; C:GO:0016020; C:GO:0016021
EduN_1200	---NA---
EduN_1201	parkin coregulated gene homolog		P:GO:0008150; C:GO:0005575
EduN_1202	---NA---
EduN_1203	Citrate mitochondrial	K01647	C:GO:0005634; P:GO:0005975; F:GO:0004108; C:GO:0070062; C:GO:0005759; P:GO:0006099
EduN_1204	Tax1-binding 1 B
EduN_1205	prominin-1-A-like isoform X1		C:GO:0016020
EduN_1206	Nesprin-1		F:GO:0051015; P:GO:0090286; C:GO:0034993
EduN_1207	---NA---
EduN_1208	PREDICTED: uncharacterized protein LOC106174035 isoform X3
EduN_1209	---NA---
EduN_121	Phosphate carrier mitochondrial		C:GO:0043209; C:GO:0070062; C:GO:0016021; F:GO:0015293; C:GO:0005730; F:GO:0032403; P:GO:0006810; C:GO:0005743
EduN_1210	Hypothetical Schistosoma UPF0506		C:GO:0005737; P:GO:0035151; P:GO:0019991; C:GO:0016020; C:GO:0016021
EduN_1211	Dual specificity testis-specific kinase 2		F:GO:0005524; F:GO:0003755; F:GO:0046872; C:GO:0016021; F:GO:0004672; P:GO:0000413; P:GO:0006457; P:GO:0006468
EduN_1212	caspase-7 isoform X1		F:GO:0008233
EduN_1213	tribbles homolog 1		P:GO:0043405; F:GO:0004672; P:GO:0007254; P:GO:0043433; F:GO:0008134; F:GO:0004860; P:GO:0045659; P:GO:0045645; C:GO:0005634; F:GO:0005524; F:GO:0031625; C:GO:0005737; P:GO:0045651; P:GO:0048662; P:GO:0014912; P:GO:0032496; P:GO:0032436; P:GO:1904030; F:GO:0055106; F:GO:0031434; P:GO:0031665
EduN_1214	---NA---
EduN_1215	---NA---
EduN_1216	---NA---
EduN_1217	---NA---
EduN_1218	alpha-L-fucosidase-like	K01206	C:GO:0044421; F:GO:0004560; P:GO:0006004
EduN_1219	---NA---
EduN_122	PREDICTED: filamin-A isoform X14 [Crassostrea gigas]	K04437	F:GO:0051015
EduN_1220	---NA---
EduN_1221	---NA---
EduN_1222	---NA---
EduN_1223	low-density lipo receptor-related 6
EduN_1224	PREDICTED: uncharacterized protein C9orf171 homolog isoform X2
EduN_1225	---NA---
EduN_1226	CCAAT enhancer binding	K10051	F:GO:0003700; P:GO:0006351; P:GO:0006355; F:GO:0043565
EduN_1227	---NA---
EduN_1228	---NA---
EduN_1229	---NA---
EduN_123	PREDICTED: mucin-17 isoform X10 [Crassostrea gigas]		P:GO:0030154; P:GO:0007399; C:GO:0005576
EduN_1230	ETS-related transcription factor Elf-1		C:GO:0005634; F:GO:0003700; P:GO:0045893; F:GO:0043565
EduN_1231	---NA---
EduN_1232	---NA---
EduN_1233	---NA---
EduN_1234	52 kDa repressor of the inhibitor of the kinase-like		F:GO:0005488
EduN_1235	circularly permutated Ras 1-like		P:GO:0046907; C:GO:0044425
EduN_1236	slit homolog 3 -like		C:GO:0016020; C:GO:0016021
EduN_1237	---NA---
EduN_1238	---NA---
EduN_1239	---NA---
EduN_124	Proteasome subunit alpha type-5	K02729	C:GO:0005634; C:GO:0070062; C:GO:0005737; C:GO:0019773; F:GO:0004298; P:GO:0006511
EduN_1240	---NA---
EduN_1241	---NA---
EduN_1242	---NA---
EduN_1243	solute carrier family facilitated glucose transporter member 1-like	K07299	F:GO:0022891; P:GO:0055085; C:GO:0016021; P:GO:0008643; C:GO:0043226; C:GO:0044424; C:GO:0005886
EduN_1244	---NA---
EduN_1245	lysine-specific demethylase 3A-like isoform X3		F:GO:0008168; P:GO:0032259
EduN_1246	---NA---
EduN_1247	---NA---
EduN_1248	serine palmitoyltransferase 2-like	K00654	F:GO:0030170; C:GO:0016021; P:GO:0009058; F:GO:0016740
EduN_1249	microfibril-associated glyco 4-like		P:GO:0050794
EduN_125	60S acidic ribosomal P0	K02941	P:GO:0042254; C:GO:0005840
EduN_1250	dynein regulatory complex subunit 7-like
EduN_1251	coiled-coil domain-containing 180-like
EduN_1252	---NA---
EduN_1253	baculoviral IAP repeat-containing 7-A-like	K12807	F:GO:0008270
EduN_1254	---NA---
EduN_1255	---NA---
EduN_1256	E3 ubiquitin- ligase DZIP3		F:GO:0000166; F:GO:0005524; C:GO:0005615; F:GO:0004197; F:GO:0008234; P:GO:0051603; C:GO:0005764
EduN_1257	cathepsin L1-like isoform X1	K01365	P:GO:0006508; F:GO:0008234
EduN_1258	WD repeat-containing 93-like isoform X2		F:GO:0016651; P:GO:0022900
EduN_1259	---NA---
EduN_126	alpha- partial	K07374	F:GO:0005525; C:GO:0043209; C:GO:0070062; F:GO:0031625; F:GO:0003725; F:GO:0003924; P:GO:0071353; F:GO:0005200; C:GO:0005881; P:GO:0000226
EduN_1260	CD151 antigen-like		C:GO:0016020; C:GO:0016021
EduN_1261	dynein heavy chain axonemal-like		F:GO:0000166; F:GO:0017111
EduN_1262	---NA---
EduN_1263	heme-binding 2-like
EduN_1264	protocadherin Fat 3 isoform X1		F:GO:0016491; F:GO:0005509; C:GO:0016020; C:GO:0016021; P:GO:0007155; P:GO:0055114; F:GO:0004022; P:GO:0007156; C:GO:0005886
EduN_1265	leucine-rich repeat-containing 71-like isoform X4
EduN_1266	---NA---
EduN_1267	ATP synthase F(0) complex subunit mitochondrial-like	K02128	F:GO:0015078; P:GO:0015991; C:GO:0045263; C:GO:0016021; P:GO:0015986
EduN_1268	---NA---
EduN_1269	rab9 effector with kelch motifs-like
EduN_127	---NA---
EduN_1270	---NA---
EduN_1271	dual oxidase 2-like	K13411	F:GO:0003676; F:GO:0004601; F:GO:0005524; P:GO:0006979; F:GO:0005509; C:GO:0016021; P:GO:0098869; F:GO:0004386; P:GO:0055114; F:GO:0020037
EduN_1272	---NA---
EduN_1273	---NA---
EduN_1274	---NA---
EduN_1275	ATP-dependent 6-phosphofructokinase-like	K00850	F:GO:0005524; F:GO:0050662; C:GO:0005737; F:GO:0046872; P:GO:0006002; P:GO:0061615; F:GO:0003872
EduN_1276	---NA---
EduN_1277	---NA---
EduN_1278	---NA---
EduN_1279	phthiocerol synthesis polyketide synthase type I -like	K09458	F:GO:0003824
EduN_128	40S ribosomal S8	K02995	F:GO:0003735; C:GO:0005840; P:GO:0006412
EduN_1280	PREDICTED: uncharacterized protein LOC105324337		C:GO:0016020; C:GO:0016021; P:GO:0006950
EduN_1281	myeloid differentiation primary response 88-like	K04729	P:GO:0007165
EduN_1282	NAD-dependent alcohol dehydrogenase		F:GO:0008270; F:GO:0016491; P:GO:0055114
EduN_1283	large subunit GTPase 1 homolog	K14539	F:GO:0000166; C:GO:0005634; C:GO:0044444; P:GO:0006810; F:GO:0016787
EduN_1284	---NA---
EduN_1285	---NA---
EduN_1286	CCR4-NOT transcription complex subunit 1	K12604	P:GO:0090503; P:GO:0006351; P:GO:0035195; C:GO:0000932; P:GO:0060213; F:GO:0042974; P:GO:0000289; C:GO:0005778; F:GO:0004535; P:GO:0000122; C:GO:0005634; F:GO:0032947; C:GO:0005615; P:GO:0006977; P:GO:0010606; P:GO:0048387; F:GO:0070016; P:GO:2000036; C:GO:0005829; P:GO:0033147; F:GO:0030331; C:GO:0030015; P:GO:0001829
EduN_1287	myosin-VIIa-like isoform X2		C:GO:0016459; F:GO:0005524; F:GO:0003779; C:GO:0016021; F:GO:0003774
EduN_1288	---NA---
EduN_1289	meiotically up-regulated gene 158 -like
EduN_129	---NA---
EduN_1290	---NA---
EduN_1291	---NA---
EduN_1292	---NA---
EduN_1293	hypothetical protein LOTGIDRAFT_232797		F:GO:0005509; C:GO:0005576
EduN_1294	---NA---
EduN_1295	dynein beta ciliary-like	K10408	F:GO:0016887; F:GO:0005524; F:GO:0003777; C:GO:0030286; P:GO:0007018
EduN_1296	Short-chain collagen C4		C:GO:0016020; C:GO:0016021
EduN_1297	Short-chain collagen C4
EduN_1298	---NA---
EduN_1299	---NA---
EduN_13	---NA---
EduN_130	---NA---
EduN_1300	E3 ubiquitin- ligase partial		F:GO:0004842; F:GO:0061630; F:GO:0008270; F:GO:0031624; C:GO:0000151; C:GO:0005737; F:GO:0046872; P:GO:0000209; P:GO:0032436; P:GO:0042787; P:GO:0016567
EduN_1301	---NA---
EduN_1302	---NA---
EduN_1303	hypothetical protein PBRA_008887, partial
EduN_1304	partial		P:GO:0006955; C:GO:0016021; F:GO:0005164
EduN_1305	E3 ubiquitin- ligase RNF213-like		F:GO:0003824; F:GO:0046872
EduN_1306	Rho-related GTP-binding		P:GO:0008360; P:GO:0007010; P:GO:0007264; C:GO:0005794; P:GO:0044763; C:GO:0044446; C:GO:0005886; P:GO:1903955; F:GO:0005525; F:GO:0005515; P:GO:0051056; C:GO:0005829; C:GO:0030054
EduN_1307	---NA---
EduN_1308	---NA---
EduN_1309	---NA---
EduN_131	mucin-16-like [Crassostrea virginica]		F:GO:0003824; P:GO:0008152; P:GO:0030154; P:GO:0007399
EduN_1310	---NA---
EduN_1311	tetratricopeptide repeat 29-like
EduN_1312	---NA---
EduN_1313	---NA---
EduN_1314	dolichyl-diphosphooligosaccharide-- glycosyltransferase subunit 2-like		C:GO:0008250; C:GO:0016021; P:GO:0006487; F:GO:0016740
EduN_1315	PREDICTED: uncharacterized protein LOC105325043		C:GO:0016020; C:GO:0016021
EduN_1316	---NA---
EduN_1317	cartilage matrix -like isoform X2		C:GO:0005581
EduN_1318	---NA---
EduN_1319	---NA---
EduN_132	cAMP response element binding protein 2 [Pteria penguin]		F:GO:0003700; P:GO:0006355; F:GO:0043565
EduN_1320	---NA---
EduN_1321	Sodium glucose cotransporter 4		C:GO:0005887; P:GO:0006811; P:GO:0055085; F:GO:0015293
EduN_1322	chromobox homolog 6		C:GO:0005634; F:GO:0016874
EduN_1323	retinoic acid receptor beta-like		F:GO:0003677; C:GO:0005634; F:GO:0003700; F:GO:0008270; P:GO:0006351; F:GO:0046872; P:GO:0006355; F:GO:0003707; F:GO:0043565; P:GO:0043401
EduN_1324	nuclear receptor coactivator 2-like isoform X5	K11255	C:GO:0005634; P:GO:0006351; P:GO:0006355; F:GO:0046983
EduN_1325	immediate early response gene 5
EduN_1326	---NA---
EduN_1327	cyclin-I-like		P:GO:0051726
EduN_1328	---NA---
EduN_1329	---NA---
EduN_133	HSP90 [Mytilus coruscus]	K04079	F:GO:0005524; F:GO:0051082; P:GO:0006457; P:GO:0006950
EduN_1330	---NA---
EduN_1331	---NA---
EduN_1332	Splicing arginine serine-rich 7	K12896	F:GO:0000166; F:GO:0003676; F:GO:0008270
EduN_1333	---NA---
EduN_1334	---NA---
EduN_1335	---NA---
EduN_1336	retrograde of 51 kDa-like isoform X3		C:GO:0005882
EduN_1337	---NA---
EduN_1338	cathepsin L	K01365	F:GO:0008233; P:GO:0044767
EduN_1339	60S ribosomal L27a	K02900	F:GO:0003735; C:GO:0022625; P:GO:0006412
EduN_134	tubulin alpha-1C chain- partial	K07374	F:GO:0005525; C:GO:0043209; C:GO:0070062; F:GO:0031625; F:GO:0003725; F:GO:0003924; P:GO:0071353; F:GO:0005200; C:GO:0005881; P:GO:0000226
EduN_1340	hemocyte -glutamine gamma-glutamyltransferase-like		F:GO:0003810; F:GO:0016746; F:GO:0046872; F:GO:0016740; P:GO:0018149
EduN_1341	beta actin	K05692	F:GO:0005524; C:GO:0005856; C:GO:0005925; C:GO:0097433; C:GO:0016021; C:GO:0005886
EduN_1342	cilia- and flagella-associated 44-like
EduN_1343	26S proteasome non-ATPase regulatory subunit 12	K03035	P:GO:0043161; C:GO:0005737; C:GO:0008541; C:GO:0031595
EduN_1344	mothers against decapentaplegic homolog 5-like	K04676	P:GO:0007391; P:GO:0061353; P:GO:0045705; P:GO:0042078; P:GO:0008586; F:GO:0001105; P:GO:0045944; P:GO:0045887; F:GO:0001102; F:GO:0000980; P:GO:0048100; C:GO:0005667; P:GO:0007507; P:GO:0045595; P:GO:0001745; P:GO:0030707; F:GO:0003705; P:GO:0035019; P:GO:2000134; P:GO:0007480; P:GO:0006351; P:GO:0007488; P:GO:0035290; P:GO:0007424; P:GO:0060799; C:GO:0005634; P:GO:0007419; P:GO:0010629; C:GO:00…
EduN_1345	Sortilin-related receptor		C:GO:0016020; C:GO:0016021; C:GO:0005794; P:GO:0006810
EduN_1346	---NA---
EduN_1347	Sphingomyelin synthase-related 1		C:GO:0016020
EduN_1348	nuclear pore complex Nup93 isoform X1	K14309	P:GO:0006606; F:GO:0017056; P:GO:0051292; P:GO:0016973; C:GO:0005643
EduN_1349	Klebsiella pneumoniae rhinoscleromatis strain complete genome {ECO:0000313		F:GO:0016787
EduN_135	---NA---
EduN_1350	Tetratricopeptide repeat 25		F:GO:0005515; P:GO:0060271; P:GO:0061371; C:GO:0005737; P:GO:0032474
EduN_1351	---NA---
EduN_1352	PREDICTED: uncharacterized protein LOC105346401
EduN_1353	---NA---
EduN_1354	proteoglycan 4-like isoform X1
EduN_1355	Klebsiella pneumoniae rhinoscleromatis strain complete genome {ECO:0000313		C:GO:0016020
EduN_1356	---NA---
EduN_1357	tetratricopeptide repeat 25-like isoform X2
EduN_1358	Proteasome subunit beta type-2	K02734	C:GO:0070062; C:GO:0005737; C:GO:0005839; C:GO:0016020; F:GO:0004298; P:GO:0051603; C:GO:0005654
EduN_1359	---NA---
EduN_136	annexin A7-like isoform X1		F:GO:0043167
EduN_1360	microtubule-actin cross-linking factor isoforms 1 2 3 5-like isoform X7		F:GO:0005488
EduN_1361	Phosphoenolpyruvate cytosolic [GTP]	K01596	P:GO:0006094; P:GO:0006475; P:GO:0061402; P:GO:0046327; F:GO:0000287; F:GO:0005525; F:GO:0031406; P:GO:0051365; C:GO:0070062; F:GO:0004613; P:GO:0032868; C:GO:0005829; F:GO:0030145; P:GO:0016310; F:GO:0016301
EduN_1362	von Willebrand factor D and EGF domain-containing		C:GO:0016020; C:GO:0016021
EduN_1363	---NA---
EduN_1364	titin- partial	K00907	F:GO:0000166; F:GO:0005524; F:GO:0004672; P:GO:0016310; F:GO:0016740; P:GO:0006468; F:GO:0016301
EduN_1365	hypothetical protein CGI_10013958		P:GO:0007267
EduN_1366	---NA---
EduN_1367	myosin heavy non-muscle-like isoform X1	K10352	C:GO:0016459; F:GO:0005524; F:GO:0003779; F:GO:0003774
EduN_1368	ATP synthase subunit mitochondrial-like	K02137	C:GO:0016020; P:GO:0015986; F:GO:0046933
EduN_1369	---NA---
EduN_137	clathrin heavy chain linker domain-containing 1 isoform X1
EduN_1370	---NA---
EduN_1371	---NA---
EduN_1372	---NA---
EduN_1373	heat shock 70 kDa 12A-like
EduN_1374	gastrula zinc finger -like		F:GO:0003676; F:GO:0046872; F:GO:0008168; F:GO:0016740; P:GO:0032259
EduN_1375	---NA---
EduN_1376	40S ribosomal S4-like	K02987	F:GO:0003735; C:GO:0005840; F:GO:0019843; P:GO:0006412
EduN_1377	---NA---
EduN_1378	RNA polymerase II elongation factor partial		C:GO:0008023; P:GO:0006368
EduN_1379	---NA---
EduN_138	Krueppel-like factor 5		F:GO:0003676; F:GO:0046872
EduN_1380	neurofibromin-like isoform X10	K08052	P:GO:0007165; F:GO:0005096; P:GO:0043547
EduN_1381	---NA---
EduN_1382	Red		C:GO:0005615; F:GO:0042802; P:GO:0006955; P:GO:0007267; C:GO:0005730; C:GO:0005654
EduN_1383	---NA---
EduN_1384	Neutral and basic amino acid transport rBAT	K14210	P:GO:0005975; F:GO:0003824; C:GO:0016020; C:GO:0016021
EduN_1385	Importin-9		F:GO:0008270; C:GO:0005737; C:GO:0016020; F:GO:0008565; P:GO:0006886; F:GO:0008536
EduN_1386	---NA---
EduN_1387	myoferlin- partial		C:GO:0044464; C:GO:0044425; C:GO:0043227
EduN_1388	---NA---
EduN_1389	---NA---
EduN_139	tripartite motif-containing 3-like		F:GO:0008270; F:GO:0046872; C:GO:0005622
EduN_1390	---NA---
EduN_1391	---NA---
EduN_1392	collagen alpha-2(IV) chain-like	K06237	C:GO:0005576
EduN_1393	---NA---
EduN_1394	ORF16-lacZ fusion
EduN_1395	oRF58e {ECO:0000313		C:GO:0009507
EduN_1396	PREDICTED: uncharacterized protein LOC105321461
EduN_1397	---NA---
EduN_1398	Select seq OPL32784.1		C:GO:0005581; C:GO:0016020; C:GO:0016021; P:GO:0007155; F:GO:0005540; C:GO:0005576; F:GO:0030246
EduN_1399	---NA---
EduN_14
EduN_140	---NA---
EduN_1400	von Willebrand factor D and EGF domain-containing -like		C:GO:0005615; F:GO:0004866; F:GO:0005509; C:GO:0016020; C:GO:0016021; P:GO:0010951; C:GO:0005576
EduN_1401	transcriptional coactivator YAP1-like isoform X1	K16687
EduN_1402	---NA---
EduN_1403	TUBB2A partial	K07375	F:GO:0005525; F:GO:0003924; F:GO:0005200; C:GO:0005874; P:GO:0007017
EduN_1404	---NA---
EduN_1405	---NA---
EduN_1406	hypothetical protein CGI_10002916
EduN_1407	tetratricopeptide repeat 23-like
EduN_1408	---NA---
EduN_1409	---NA---
EduN_141	Nuclease-sensitive element-binding 1		C:GO:0005634; F:GO:0003677; F:GO:0003723; P:GO:0006351; P:GO:0006355
EduN_1410	---NA---
EduN_1411	major vault -like		C:GO:0005634; C:GO:0030529; C:GO:0005737
EduN_1412	major vault -like		C:GO:0005634; P:GO:0001654; C:GO:0030529; C:GO:0005737; P:GO:0031102; P:GO:0007420
EduN_1413	Major vault		P:GO:0001654; P:GO:0031102; P:GO:0007420
EduN_1414	glutamate--cysteine ligase catalytic partial	K11204	P:GO:0009410; P:GO:0043524; F:GO:0000287; F:GO:0005524; P:GO:0006979; P:GO:0006536; P:GO:0009408; P:GO:0008637; P:GO:0045892; F:GO:0046982; P:GO:0046685; C:GO:0005829; P:GO:0051409; F:GO:0016595; P:GO:0031397; P:GO:0051900; C:GO:0017109; P:GO:2000490; P:GO:0006750; P:GO:0045454; F:GO:0043531; P:GO:0006534; P:GO:0009725; F:GO:0004357; F:GO:0050662; P:GO:0050880; C:GO:0016021; P:GO:2001237; P:GO:00…
EduN_1415	Baculoviral IAP repeat-containing 3	K16060	P:GO:1902443; P:GO:1901222; P:GO:0001890; P:GO:0044238; C:GO:0009898; P:GO:0042326; P:GO:1902916; C:GO:0005634; F:GO:0005515; P:GO:0044260; P:GO:0070266; P:GO:0043066; P:GO:0010468; P:GO:0071356; C:GO:0035631; F:GO:0016740; P:GO:0031347; P:GO:2000378
EduN_1416	T-complex 1 subunit eta		C:GO:0043229; F:GO:0005524; F:GO:0051082; C:GO:0043234; C:GO:0044444; P:GO:0006457; C:GO:0043227
EduN_1417	hypothetical protein CGI_10010851
EduN_1418	26S protease regulatory subunit 10B	K03064	F:GO:0005524; C:GO:0005737; P:GO:0030163; P:GO:0006508; F:GO:0008233
EduN_1419	---NA---
EduN_142	alpha partial	K07374	F:GO:0005525; C:GO:0005737; F:GO:0003924; F:GO:0005200; C:GO:0005874; P:GO:0007017
EduN_1420	PREDICTED: uncharacterized protein LOC105318865		F:GO:0008080
EduN_1421	cleavage and polyadenylation specificity factor subunit 6-like	K14398	F:GO:0000166; F:GO:0003676
EduN_1422	syntenin-1 isoform X1		P:GO:0007154; C:GO:0016020; P:GO:0044763; F:GO:0005488; P:GO:0044700; P:GO:0050896
EduN_1423	heat shock 70 kDa 12A-like		F:GO:0000166; F:GO:0005524
EduN_1424	---NA---
EduN_1425	peflin-like isoform X1		F:GO:0005509
EduN_1426	WD repeat-containing 78		P:GO:0002244
EduN_1427	---NA---
EduN_1428	---NA---
EduN_1429	---NA---
EduN_143	Tubulin alpha partial	K07374	F:GO:0005525; C:GO:0005737; F:GO:0003924; F:GO:0005200; C:GO:0005874; P:GO:0007017
EduN_1430	nuclear receptor coactivator 4-like		P:GO:0008150; C:GO:0005575
EduN_1431	fibropellin-1-like isoform X8		F:GO:0005509; C:GO:0005581
EduN_1432	---NA---
EduN_1433	PREDICTED: uncharacterized protein LOC105335574 isoform X2
EduN_1434	Onco -induced transcript 3		C:GO:0016020; C:GO:0016021
EduN_1435	angiopoietin-related 1-like
EduN_1436	collagen alpha-1(I) chain-like	K06236	C:GO:0005581; F:GO:0005201; C:GO:0005578
EduN_1437	---NA---
EduN_1438	IQ and AAA domain-containing 1		F:GO:0000166; F:GO:0005524
EduN_1439	---NA---
EduN_144	---NA---
EduN_1440	ferric-chelate reductase 1		C:GO:0016020; C:GO:0016021; P:GO:0055114
EduN_1441	CD109 antigen-like [Mizuhopecten yessoensis]		C:GO:0005615; F:GO:0004866; F:GO:0005506; F:GO:0016705; C:GO:0016021; P:GO:0010951; P:GO:0055114; F:GO:0020037
EduN_1442	---NA---
EduN_1443	glutamate synthase [NADPH] isoform X1	K00264	P:GO:0006537; F:GO:0010181; F:GO:0005506; F:GO:0016040; F:GO:0050660; P:GO:0055114; F:GO:0051536
EduN_1444	---NA---
EduN_1445	---NA---
EduN_1446	---NA---
EduN_1447	---NA---
EduN_1448	---NA---
EduN_1449	MAP microtubule affinity-regulating kinase 3		P:GO:0040027; P:GO:0040025; P:GO:0040035; P:GO:0009792; P:GO:0009880; P:GO:0000226; F:GO:0004674; P:GO:0009949; F:GO:0005524; F:GO:0046872; P:GO:0045167; C:GO:0005938; P:GO:0030010; P:GO:0055059; F:GO:0032035; P:GO:0018105
EduN_145	---NA---
EduN_1450	---NA---
EduN_1451	40S ribosomal S14	K02955	P:GO:0000462; P:GO:0043009; F:GO:0003735; F:GO:0048027; C:GO:0022627; P:GO:0000028; F:GO:0070181; P:GO:0006412; P:GO:0043249
EduN_1452	---NA---
EduN_1453	---NA---
EduN_1454	---NA---
EduN_1455	metallothionein MT-10		F:GO:0046872
EduN_1456	hypothetical protein CGI_10002646		F:GO:0008061; P:GO:0006030; C:GO:0016020; C:GO:0016021; C:GO:0005576
EduN_1457	---NA---
EduN_1458	---NA---
EduN_1459	THAP domain-containing 2
EduN_146	Metabotropic glutamate receptor 4	K04607	P:GO:0007165; C:GO:0016020; F:GO:0004871
EduN_1460	intraflagellar transport 81 homolog		F:GO:0015631; C:GO:0005813; C:GO:0031514; P:GO:0042073; C:GO:0030992
EduN_1461	---NA---
EduN_1462	Golgi-associated plant pathogenesis-related 1-like		C:GO:0005576
EduN_1463	---NA---
EduN_1464	---NA---
EduN_1465	vacuolar sorting-associated 51 homolog		F:GO:0030306; P:GO:0044241; P:GO:0007030; P:GO:0010517; C:GO:0005622; P:GO:0048193
EduN_1466	---NA---
EduN_1467	transcriptional regulator ATRX-like		F:GO:0005524
EduN_1468	---NA---
EduN_1469	actin-related 2 3 complex subunit partial	K05758	F:GO:0051015; P:GO:0010592; C:GO:0005768; C:GO:0070062; C:GO:0005925; C:GO:0036195; C:GO:0031252; P:GO:0034314; C:GO:0005794; F:GO:0005200; P:GO:1900026; C:GO:0005885
EduN_147	40S ribosomal S10-like	K02947	F:GO:0003735; C:GO:0022627; P:GO:0000028
EduN_1470	---NA---
EduN_1471	---NA---
EduN_1472	---NA---
EduN_1473	---NA---
EduN_1474	---NA---
EduN_1475	staphylococcal nuclease domain-containing 1	K15979	F:GO:0003712; P:GO:0035194; C:GO:0016442; P:GO:1903506
EduN_1476	hypothetical protein CGI_10016314
EduN_1477	---NA---
EduN_1478	voltage-gated potassium channel subunit beta		F:GO:0016491; P:GO:0055114
EduN_1479	basement membrane-specific heparan sulfate proteoglycan core		F:GO:0008022; P:GO:0060351; P:GO:0002062; P:GO:0008104; F:GO:0002020; P:GO:0007420; C:GO:0005576; P:GO:0048738; C:GO:0005578; P:GO:0048704; C:GO:0005615; C:GO:0005604; F:GO:0005515; C:GO:0070062; C:GO:0005925; C:GO:0005605; P:GO:0001525; F:GO:0046872; F:GO:0005509; C:GO:0016020; C:GO:0016021; P:GO:0030198; P:GO:0001958; C:GO:0031012
EduN_148	PREDICTED: calmodulin-A isoform X2 [Sinocyclocheilus anshuiensis]	K02183	P:GO:0010880; F:GO:0016705; F:GO:0043565; P:GO:0006468; P:GO:0043401; F:GO:0005524; F:GO:0031418; F:GO:0003700; P:GO:0051343; C:GO:0034704; C:GO:0070062; P:GO:0030801; F:GO:0005506; F:GO:0072542; F:GO:0005509; F:GO:0043274; P:GO:0032465; F:GO:0003707; F:GO:0031432; F:GO:0031996; F:GO:0031997; P:GO:0007160; F:GO:0019901; F:GO:0008270; F:GO:0019904; P:GO:0006351; C:GO:0000922; P:GO:0060316; P:GO:00…
EduN_1480	---NA---
EduN_1481	---NA---
EduN_1482	---NA---
EduN_1483	kinase C iota type	K06069	C:GO:0015630; P:GO:0007010; P:GO:0034351; P:GO:0006468; P:GO:0051092; P:GO:0043524; F:GO:0005524; C:GO:0045171; C:GO:0070062; P:GO:0016192; P:GO:0045197; C:GO:0005829; P:GO:0010976; P:GO:2000353; P:GO:0035556; P:GO:0061024; P:GO:0060252; F:GO:0004674; F:GO:0005543; P:GO:0043434; C:GO:0005886; C:GO:0005634; F:GO:0005515; P:GO:0032879; P:GO:0070830; P:GO:0034613
EduN_1484	elongation factor 2- partial	K03234	P:GO:0002244; F:GO:0005525; P:GO:0045471; F:GO:0002039; C:GO:0070062; P:GO:0002931; F:GO:0003746; P:GO:0003009; P:GO:0017183; P:GO:0035914; F:GO:0003924; C:GO:0005829; C:GO:0031012; C:GO:0016235; F:GO:0019901; P:GO:0014076; F:GO:0008097; P:GO:0042542; P:GO:0007568; P:GO:0006414; C:GO:0005886; C:GO:0042788; F:GO:0051015; F:GO:0098641; C:GO:0005634; P:GO:2000767; C:GO:0005913; F:GO:0043022; C:GO:00…
EduN_1485	---NA---
EduN_1486	phospholipid scramblase 1-like		C:GO:0016020
EduN_1487	---NA---
EduN_1488	WD repeat domain phosphoinositide-interacting 3-like		P:GO:0044804; P:GO:0034497; C:GO:0034045; P:GO:0006497; C:GO:0005829; F:GO:0080025; F:GO:0032266; C:GO:0019898; P:GO:0000422
EduN_1489	---NA---
EduN_149	tubulin alpha-3 chain-like	K07374	F:GO:0005525; C:GO:0043209; C:GO:0070062; F:GO:0031625; F:GO:0003725; F:GO:0003924; P:GO:0071353; C:GO:0016021; F:GO:0005200; C:GO:0005881; P:GO:0007017
EduN_1490	nuclear hormone receptor HR96-like isoform X14	K14035	F:GO:0004887; C:GO:0005634; F:GO:0008270; P:GO:0006351; F:GO:0003707; P:GO:0006355; F:GO:0043565; P:GO:0043401; P:GO:0030522
EduN_1491	4-aminobutyrate mitochondrial-like	K13524	F:GO:0008483; F:GO:0005488; P:GO:0009448
EduN_1492	heat shock 70 kDa 12A-like		C:GO:0016020; C:GO:0016021
EduN_1493	---NA---
EduN_1494	---NA---
EduN_1495	eukaryotic translation initiation factor 2-alpha kinase	K16196	P:GO:0044238; P:GO:0044237; P:GO:0071704
EduN_1496	exportin-4 isoform X1		C:GO:0044424
EduN_1497	---NA---
EduN_1498	---NA---
EduN_1499	eukaryotic translation initiation factor 3 subunit G	K03248	F:GO:0000166; F:GO:0003743; P:GO:0001731; C:GO:0016282; C:GO:0016021; C:GO:0033290; P:GO:0006446; C:GO:0005852
EduN_15	polyadenylate-binding 4-like	K13126	F:GO:0000166; F:GO:0003723; C:GO:0005737
EduN_150	---NA---
EduN_1500	UPF0691 C9orf116 homolog
EduN_1501	---NA---
EduN_1502	---NA---
EduN_1503	centrosome-associated CEP250-like isoform X1
EduN_1504	---NA---
EduN_1505	---NA---
EduN_1506	PREDICTED: uncharacterized protein LOC105334161 isoform X2
EduN_1507	---NA---
EduN_1508	---NA---
EduN_1509	cytochrome b-c1 complex subunit mitochondrial-like	K00411	F:GO:0016679; C:GO:0005739; C:GO:0016020; F:GO:0051536; P:GO:0044699
EduN_151	---NA---
EduN_1510	---NA---
EduN_1511	tax1-binding 1 homolog isoform X2
EduN_1512	tax1-binding 1 homolog isoform X2
EduN_1513	Krueppel-like factor 7
EduN_1514	ubiquinol-cytochrome C reductase subunit partial	K00417	C:GO:0005750; P:GO:0006122
EduN_1515	coiled-coil domain-containing 108-like
EduN_1516	---NA---
EduN_1517	---NA---
EduN_1518	---NA---
EduN_1519	Cartilage matrix	K16630	F:GO:0046872
EduN_152	solute carrier family 8 member partial	K05849	P:GO:0007154; P:GO:0007399; C:GO:0044444; C:GO:0044446; F:GO:0005432; P:GO:0006874; P:GO:0007611; C:GO:0043231; P:GO:0006816; C:GO:0016021; P:GO:0030154; P:GO:0035725; C:GO:0031226; P:GO:0050789
EduN_1520	---NA---
EduN_1521	---NA---
EduN_1522	glutamine synthetase 2 cytoplasmic-like	K01915	F:GO:0005524; P:GO:0006542; F:GO:0004356
EduN_1523	---NA---
EduN_1524	arginase type I	K01476	P:GO:0006525; F:GO:0046872; P:GO:0000050; F:GO:0004053; P:GO:0032501
EduN_1525	T-complex 1 subunit beta		F:GO:0005524; C:GO:0005737; F:GO:0051082; P:GO:0006457
EduN_1526	Plasminogen activator inhibitor 1 RNA-binding		F:GO:0003730
EduN_1527	---NA---
EduN_1528	myticin C
EduN_1529	---NA---
EduN_153	---NA---
EduN_1530	---NA---
EduN_1531	---NA---
EduN_1532	Cytosolic phospholipase A2	K16342	P:GO:0008152
EduN_1533	short-chain collagen C4- partial		C:GO:0016020; C:GO:0016021
EduN_1534	---NA---
EduN_1535	leucine-rich repeat-containing 23-like isoform X1		F:GO:0003824
EduN_1536	probable ATP-dependent RNA helicase DDX23	K12858	F:GO:0003676; P:GO:0000375; F:GO:0005524; C:GO:0071013; C:GO:0005682; P:GO:0010501; F:GO:0004004
EduN_1537	Dynein heavy chain axonemal	K10408	F:GO:0000166; F:GO:0017111
EduN_1538	histone deacetylase complex subunit SAP130-like isoform X1		C:GO:1902494; F:GO:0005515; P:GO:0044260; C:GO:0044451; P:GO:0006355; P:GO:0044238
EduN_1539	---NA---
EduN_154	---NA---
EduN_1540	---NA---
EduN_1541	---NA---
EduN_1542	---NA---
EduN_1543	---NA---
EduN_1544	---NA---
EduN_1545	---NA---
EduN_1546	TRIO and F-actin-binding
EduN_1547	A disintegrin and Metalloproteinase with thrombospondin motifs 1		P:GO:0007229; P:GO:0006508; C:GO:0016020; C:GO:0016021; F:GO:0004222; F:GO:0008237
EduN_1548	---NA---
EduN_1549	---NA---
EduN_155	---NA---
EduN_1550	---NA---
EduN_1551	---NA---
EduN_1552	---NA---
EduN_1553	Phosphoserine phosphatase	K01079	F:GO:0000287; F:GO:0004647; C:GO:0005737; P:GO:0006564; P:GO:0016311
EduN_1554	---NA---
EduN_1555	Cytadherence high molecular weight 2		F:GO:0008061; P:GO:0006030; C:GO:0016021; C:GO:0005576
EduN_1556	---NA---
EduN_1557	---NA---
EduN_1558	---NA---
EduN_1559	---NA---
EduN_156	---NA---
EduN_1560	PREDICTED: uncharacterized protein LOC106055076		P:GO:0006812; P:GO:0098655; C:GO:0016020; C:GO:0016021; F:GO:0008324
EduN_1561	---NA---
EduN_1562	tubulin beta-4B chain-like	K07375	C:GO:0043209; F:GO:0005200; F:GO:0042288; F:GO:0051082; C:GO:0043025; P:GO:0042267; C:GO:0005874; P:GO:0007017; F:GO:0005525; C:GO:0005634; C:GO:0070062; P:GO:0000086; F:GO:0003725; P:GO:0006928; F:GO:0003924; C:GO:0005929; C:GO:0033269; C:GO:0005829
EduN_1563	---NA---
EduN_1564	---NA---
EduN_1565	Proteasome subunit beta type-7	K02739	C:GO:0070062; C:GO:0005737; C:GO:0005839; F:GO:0004298; P:GO:0051603; P:GO:1903955; C:GO:0005654
EduN_1566	PREDICTED: protein TFG-like		F:GO:0003677
EduN_1567	MTSS1 isoform X2		P:GO:0007009; F:GO:0003779; C:GO:0016020; C:GO:0016021
EduN_1568	---NA---
EduN_1569	---NA---
EduN_157	---NA---
EduN_1570	---NA---
EduN_1571	thioredoxin domain-containing 3 homolog isoform X21		C:GO:0005623; P:GO:0006228; P:GO:0006241; P:GO:0006183; P:GO:0006165; P:GO:0007155; P:GO:0045454; F:GO:0004550; F:GO:0030246
EduN_1572	-glutamine gamma-glutamyltransferase K-like isoform X1		F:GO:0003810; P:GO:0018149
EduN_1573	---NA---
EduN_1574	---NA---
EduN_1575	---NA---
EduN_1576	erythrocyte band 7 integral membrane		C:GO:0016020
EduN_1577	---NA---
EduN_1578	---NA---
EduN_1579	---NA---
EduN_158	calpain-9-like isoform X2		F:GO:0016787
EduN_1580	---NA---
EduN_1581	early growth response 1-B-like	K09203	F:GO:0003676; F:GO:0046872
EduN_1582	aryl hydrocarbon receptor		C:GO:0005634; C:GO:0005667; F:GO:0003700; C:GO:0005737; P:GO:0006351; P:GO:0006355; F:GO:0046983
EduN_1583	uncharacterized protein LOC110465164		P:GO:0007154; C:GO:0016020
EduN_1584	ferric-chelate reductase 1		F:GO:0016491
EduN_1585	centriolin-like isoform X1		P:GO:0051301; P:GO:0000278
EduN_1586	---NA---
EduN_1587	Cytadherence high molecular weight 2		F:GO:0008061; P:GO:0006030; C:GO:0016021; C:GO:0005576
EduN_1588	serine arginine repetitive matrix 1-like isoform X1
EduN_1589	---NA---
EduN_159	---NA---
EduN_1590	Proteasome subunit beta type-4	K02736	C:GO:0005634; F:GO:0008270; C:GO:0005737; F:GO:0004181; C:GO:0005839; F:GO:0004298; P:GO:0051603
EduN_1591	---NA---
EduN_1592	---NA---
EduN_1593	---NA---
EduN_1594	---NA---
EduN_1595	---NA---
EduN_1596	ubiquitin-60S ribosomal L40	K02927	C:GO:0000220; F:GO:0003735; F:GO:0015078; P:GO:0015991; P:GO:0002181; C:GO:0016021; C:GO:0022625; F:GO:0031386; C:GO:0005875; P:GO:0006511; P:GO:0016567
EduN_1597	---NA---
EduN_1598	---NA---
EduN_1599	---NA---
EduN_16	10 kDa secreted		C:GO:0016021
EduN_160	---NA---
EduN_1600	---NA---
EduN_1601	---NA---
EduN_1602	Nucleolar GTP-binding 2	K14537	F:GO:0005525; F:GO:0003924; P:GO:0042254; C:GO:0005730
EduN_1603	---NA---
EduN_1604	---NA---
EduN_1605	---NA---
EduN_1606	---NA---
EduN_1607	---NA---
EduN_1608	Fibrinogen C domain-containing 1	K06252
EduN_1609	microfibril-associated glyco 4-like	K06252
EduN_161	---NA---
EduN_1610	---NA---
EduN_1611	serine threonine- phosphatase 6 regulatory ankyrin repeat subunit A-	K10380
EduN_1612	40S ribosomal S15a	K02957	P:GO:0015992; F:GO:0003735; C:GO:0033179; C:GO:0005840; P:GO:0006412
EduN_1613	Neurogenic locus notch 3		P:GO:0007154; C:GO:0016020
EduN_1614	semaphorin-2A- partial	K06842	C:GO:0016020; C:GO:0016021
EduN_1615	---NA---
EduN_1616	#NAME?		P:GO:0010033; F:GO:0005515; F:GO:0043167; P:GO:0006457; P:GO:0006950
EduN_1617	---NA---
EduN_1618	heat shock cognate 71 kDa -like	K03283	C:GO:0005634; F:GO:0005524; P:GO:0009408; C:GO:0005737; C:GO:0016020; P:GO:0046688; P:GO:0046686; P:GO:1903842
EduN_1619	heat shock cognate 71 kDa -like	K03283	C:GO:0005634; F:GO:0005524; P:GO:0009408; C:GO:0005737; C:GO:0016020; P:GO:0046688; P:GO:0046686; P:GO:1903842
EduN_162	cytochrome c oxidase subunit II (mitochondrion)	K00412	F:GO:0004129; F:GO:0005507; F:GO:0008121; C:GO:0045275; P:GO:1902600; P:GO:0006122; C:GO:0005743
EduN_1620	---NA---
EduN_1621	homeobox Mohawk-like		F:GO:0003677
EduN_1622	---NA---
EduN_1623	luc7 3		P:GO:0006376; F:GO:0003729; C:GO:0071004; C:GO:0005685; C:GO:0005654
EduN_1624	---NA---
EduN_1625	---NA---
EduN_1626	---NA---
EduN_1627	---NA---
EduN_1628	multiple epidermal growth factor-like domains 10		F:GO:0004721; F:GO:0004725; P:GO:0006470; F:GO:0016791; P:GO:0016311; P:GO:0035335; F:GO:0016787
EduN_1629	---NA---
EduN_163	cytochrome b (mitochondrion)	K00412	F:GO:0004129; F:GO:0005507; F:GO:0008121; C:GO:0045275; P:GO:1902600; P:GO:0006122; C:GO:0005743
EduN_1630	---NA---
EduN_1631	intraflagellar transport 22 homolog		F:GO:0005525; F:GO:0000166; P:GO:0007264; C:GO:0030992; C:GO:0005622
EduN_1632	---NA---
EduN_1633	heat shock 70 kDa 12A-like		F:GO:0000166; F:GO:0005524; C:GO:0016020; C:GO:0016021
EduN_1634	von Willebrand factor D and EGF domain-containing -like		C:GO:0016020; C:GO:0016021
EduN_1635	serine threonine- kinase ULK2-like isoform X1		F:GO:0000166; F:GO:0005524; F:GO:0004672; P:GO:0016310; F:GO:0004674; P:GO:0006468; F:GO:0016301
EduN_1636	---NA---
EduN_1637	Alpha- kinase vwkA		C:GO:0016020; C:GO:0016021
EduN_1638	---NA---
EduN_1639	---NA---
EduN_164	---NA---
EduN_1640	inhibitor of nuclear factor kappa B-2
EduN_1641	---NA---
EduN_1642	Steroid 17-alpha-hydroxylase 17,20 lyase	K07422	F:GO:0005506; F:GO:0016705; C:GO:0016021; F:GO:0016829; P:GO:0055114; F:GO:0004497; F:GO:0020037
EduN_1643	---NA---
EduN_1644	---NA---
EduN_1645	---NA---
EduN_1646	---NA---
EduN_1647	---NA---
EduN_1648	---NA---
EduN_1649	---NA---
EduN_165	---NA---
EduN_1650	---NA---
EduN_1651	---NA---
EduN_1652	Alba C9orf23		F:GO:0016614
EduN_1653	---NA---
EduN_1654	---NA---
EduN_1655	PREDICTED: uncharacterized protein LOC105318584		F:GO:0008061; F:GO:0005509; P:GO:0006030; C:GO:0005576
EduN_1656	testis-expressed sequence 43 -like
EduN_1657	---NA---
EduN_1658	---NA---
EduN_1659	---NA---
EduN_166	cathepsin B-like [Crassostrea virginica]	K01363	C:GO:0005615; C:GO:0016020; F:GO:0004197; P:GO:0051603; C:GO:0005764
EduN_1660	---NA---
EduN_1661	cyclic AMP-responsive element-binding 3 1 isoform X2		P:GO:0050794
EduN_1662	ATP-binding cassette sub-family A member 3		F:GO:0000166; F:GO:0016887; F:GO:0005524; C:GO:0016020; C:GO:0016021; P:GO:0006810; F:GO:0005215
EduN_1663	---NA---
EduN_1664	---NA---
EduN_1665	---NA---
EduN_1666	transmembrane protease serine 2-like		P:GO:0006508; C:GO:0016020; C:GO:0016021; F:GO:0008236; F:GO:0005044; F:GO:0004252; F:GO:0008233; P:GO:0006898; F:GO:0016787
EduN_1667	Histone partial	K11251	P:GO:0007275; F:GO:0000979; F:GO:0000978; F:GO:0031492; P:GO:0006342; C:GO:0000786; P:GO:0045944; C:GO:0005720; C:GO:0001740; F:GO:0000980; P:GO:0032869; P:GO:0071392; C:GO:0070062; F:GO:0046982; C:GO:0005719
EduN_1668	---NA---
EduN_1669	---NA---
EduN_167	---NA---
EduN_1670	neuronal acetylcholine receptor subunit alpha-6		P:GO:0006810
EduN_1671	---NA---
EduN_1672	UPF0468 partial		P:GO:0018095; C:GO:0070062; P:GO:0060271; C:GO:0005814; C:GO:0036064; P:GO:0060296; P:GO:2000253; C:GO:0005654; P:GO:2000147
EduN_1673	---NA---
EduN_1674	glutamine--fructose-6-phosphate aminotransferase [isomerizing] 2-like isoform X2	K00820	P:GO:0005975; F:GO:0004360; P:GO:1901137; F:GO:0030246
EduN_1675	---NA---
EduN_1676	galactose-specific lectin nattectin-like		P:GO:0048518
EduN_1677	---NA---
EduN_1678	Collagen alpha-4(VI) chain	K06238	C:GO:0005581; C:GO:0016020; C:GO:0016021
EduN_1679	---NA---
EduN_168	---NA---
EduN_1680	AAC-rich mRNA clone AAC4 -like		C:GO:0016020; C:GO:0016021; P:GO:0006886; C:GO:0005622
EduN_1681	E3 ubiquitin- ligase MIB2 isoform X1		F:GO:0003824
EduN_1682	---NA---
EduN_1683	tyrosine- kinase SRK2-like	K05704	P:GO:0007010; P:GO:0007169; P:GO:0038083; F:GO:0005102; P:GO:0042127; F:GO:0005524; F:GO:0004715; P:GO:0043066; P:GO:0045087; P:GO:0030154; C:GO:0031234; P:GO:0050764; P:GO:0071801
EduN_1684	---NA---
EduN_1685	---NA---
EduN_1686	---NA---
EduN_1687	---NA---
EduN_1688	Myb-binding 1A		P:GO:0090304; P:GO:0034654; P:GO:0034645
EduN_1689	---NA---
EduN_169	Tubulin beta-4B chain [Phoenicopterus ruber ruber]	K07375	F:GO:0005525; C:GO:0005634; C:GO:0043209; C:GO:0070062; C:GO:0045298; C:GO:0005737; F:GO:0003725; F:GO:0003924; F:GO:0005200; C:GO:0031012; C:GO:0005874; P:GO:0007017
EduN_1690	---NA---
EduN_1691	proteasome subunit beta type-5-like	K02737	C:GO:0005634; C:GO:0005737; C:GO:0005839; F:GO:0004298; P:GO:0051603
EduN_1692	---NA---
EduN_1693	---NA---
EduN_1694	SET		C:GO:0005634; P:GO:0006334
EduN_1695	High mobility group DSP1
EduN_1696	---NA---
EduN_1697	---NA---
EduN_1698	tubulin-specific chaperone E		F:GO:0046872; F:GO:0016829; F:GO:0004462
EduN_1699	---NA---
EduN_17	NADH dehydrogenase subunit 5 (mitochondrion)	K03883	C:GO:0016021; F:GO:0008137; P:GO:0042773; C:GO:0005743; C:GO:0070469
EduN_170	40S ribosomal partial	K02985	P:GO:2001272; P:GO:0006281; P:GO:0043009; P:GO:0043507; C:GO:0022627; P:GO:1902231; P:GO:1901224; P:GO:0007059; C:GO:0005730; P:GO:0051092; C:GO:0005844; F:GO:0097100; P:GO:0051225; C:GO:0070062; C:GO:0005925; C:GO:0072686; C:GO:0032587; F:GO:0003729; C:GO:0071159; P:GO:0031397; P:GO:0070301; P:GO:0031116; P:GO:0017148; F:GO:0030544; P:GO:0045739; F:GO:0019901; F:GO:0032183; P:GO:0042769; P:GO:00…
EduN_1700	PREDICTED: uncharacterized protein LOC105327882
EduN_1701	spartin-like	K19366	P:GO:0045033; C:GO:0005780
EduN_1702	PREDICTED: uncharacterized protein LOC102801626
EduN_1703	PREDICTED: uncharacterized protein LOC105317104		P:GO:0007165
EduN_1704	kelch 5
EduN_1705	---NA---
EduN_1706	rho GTPase-activating 7-like isoform X4		P:GO:0007165; F:GO:0008289
EduN_1707	---NA---
EduN_1708	---NA---
EduN_1709	dolichol phosphate-mannose biosynthesis regulatory		C:GO:0005789; F:GO:0016757; P:GO:0006464; P:GO:0044255; C:GO:0032991; P:GO:1901137; P:GO:0034645
EduN_171	40S ribosomal S3	K02985	C:GO:0005634; P:GO:0006281; F:GO:0003723; F:GO:0003735; C:GO:0022627; F:GO:0003684; F:GO:0008534; P:GO:0006412
EduN_1710	frizzled receptor		F:GO:0042813; F:GO:0004888; P:GO:0007275; C:GO:0016020; C:GO:0016021; P:GO:0060070; P:GO:0016055; P:GO:0007166
EduN_1711	---NA---
EduN_1712	---NA---
EduN_1713	dynein heavy chain domain-containing 1-like	K10408	F:GO:0005524; F:GO:0003777; C:GO:0030286; P:GO:0007018; P:GO:0006810
EduN_1714	---NA---
EduN_1715	probable phospholipid-transporting ATPase IIB		F:GO:0000287; F:GO:0005524; C:GO:0005802; P:GO:0016192; P:GO:0045332; C:GO:0016021; C:GO:0030131; F:GO:0004012; P:GO:0006886
EduN_1716	---NA---
EduN_1717	heterogeneous nuclear ribonucleo A1-like isoform X1	K12741	F:GO:0000166; F:GO:0003676; C:GO:0030529; C:GO:0019013
EduN_1718	MAATS1 isoform X1
EduN_1719	---NA---
EduN_172	40S ribosomal S3		P:GO:0006281; P:GO:0043507; P:GO:1902231; P:GO:1901224; P:GO:0007059; P:GO:0006364; P:GO:0051092; P:GO:0019083; P:GO:0000184; P:GO:0006915; F:GO:0003729; P:GO:0031397; P:GO:0031116; P:GO:0017148; F:GO:0030544; F:GO:0019901; P:GO:0045738; P:GO:0061481; P:GO:0007067; P:GO:0006413; F:GO:0051059; F:GO:0003735; C:GO:0005759; P:GO:0010628; P:GO:0032079; F:GO:0051536; F:GO:0032357; F:GO:0032358; F:GO:00…
EduN_1720	dnaJ homolog subfamily B member 13-like		F:GO:0051082; P:GO:0006457
EduN_1721	Histone deacetylase complex subunit SAP30L		C:GO:0005634
EduN_1722	nephrin-like isoform X1		C:GO:0016020; C:GO:0016021
EduN_1723	---NA---
EduN_1724	---NA---
EduN_1725	---NA---
EduN_1726	tubulin polyglutamylase TTLL5-like isoform X1		P:GO:0006464
EduN_1727	ATP synthase subunit mitochondrial	K02134	C:GO:0045261; F:GO:0046961; P:GO:0015986; F:GO:0046933
EduN_1728	---NA---
EduN_1729	Metastasis-associated MTA1		C:GO:0005634; F:GO:0003700; F:GO:0008270; P:GO:0006355; F:GO:0043565; F:GO:0003682
EduN_173	40S ribosomal S3	K02985	P:GO:0006281; C:GO:0022627; P:GO:0006351; P:GO:0006355; P:GO:0007067; C:GO:0005730; F:GO:0003684; C:GO:0005743; F:GO:0008534; P:GO:0006412; P:GO:0006417; P:GO:0051301; F:GO:0003723; F:GO:0003735; P:GO:0006915; C:GO:0005819
EduN_1730	E3 ubiquitin- ligase TRIM33		F:GO:0008270; F:GO:0046872; F:GO:0016874; C:GO:0005622
EduN_1731	bifunctional 3 -phosphoadenosine 5 -phosphosulfate synthase-like isoform X3	K13811	F:GO:0005524; P:GO:0050428; F:GO:0004020; F:GO:0004781; P:GO:0016310; P:GO:0000103
EduN_1732	dynein heavy chain axonemal-like	K10408	F:GO:0016887; F:GO:0005524; F:GO:0003777; C:GO:0030286; P:GO:0007018
EduN_1733	---NA---
EduN_1734	Myosin-2 heavy chain		F:GO:0008061; P:GO:0006030; C:GO:0016021; C:GO:0005576
EduN_1735	---NA---
EduN_1736	partial		P:GO:0008150; C:GO:0005575; F:GO:0003674
EduN_1737	eukaryotic translation initiation factor 5A-1		F:GO:0003743; P:GO:0045905; F:GO:0003746; F:GO:0043022; P:GO:0006452; P:GO:0006413; P:GO:0045901
EduN_1738	serine threonine- phosphatase 2A catalytic subunit beta isoform	K04382	F:GO:0004721; P:GO:0006470
EduN_1739	---NA---
EduN_174	Armadillo repeat-containing 4		P:GO:0021591; C:GO:0030117; P:GO:0007507; P:GO:0016192; P:GO:0036158; C:GO:0097546; P:GO:0003341; P:GO:0006886; C:GO:0005930; P:GO:0007368; C:GO:0005654; P:GO:0003356
EduN_1740	Glutaredoxin-3		P:GO:0016579; P:GO:0055072; F:GO:0015035; F:GO:0009055; P:GO:0045454; P:GO:0020027; P:GO:0002026; C:GO:0030018; C:GO:0070062; F:GO:0046872; P:GO:0010614; C:GO:0005938; P:GO:0055114; F:GO:0051536; F:GO:0036459
EduN_1741	---NA---
EduN_1742	Tripartite motif-containing 2		F:GO:0008270; F:GO:0046872; C:GO:0005622
EduN_1743	interleukin-6 receptor subunit beta-like isoform X1
EduN_1744	---NA---
EduN_1745	---NA---
EduN_1746	lifeguard 3-like isoform X2		C:GO:0016020
EduN_1747	cytochrome heme mitochondrial	K00413	F:GO:0045155; F:GO:0045153; C:GO:0005750; P:GO:0006122; P:GO:0042776
EduN_1748	DNA fragmentation factor subunit beta-like isoform X2		C:GO:0005634; C:GO:0005737; P:GO:0006309; P:GO:0006915; C:GO:0005622; F:GO:0016787
EduN_1749	H(+) Cl(-) exchange transporter 7-like		P:GO:1903959; P:GO:0034220; C:GO:0016021; P:GO:0006821; F:GO:0005247
EduN_175	sonic hedgehog A-like	K06224	P:GO:0007275; P:GO:0044763
EduN_1750	---NA---
EduN_1751	---NA---
EduN_1752	Conserved
EduN_1753	---NA---
EduN_1754	---NA---
EduN_1755	charged multivesicular body 2b-like	K12192	P:GO:0007034; C:GO:0005622
EduN_1756	RING finger 10-like		F:GO:0008270; F:GO:0046872
EduN_1757	---NA---
EduN_1758	---NA---
EduN_1759	T-complex 1 subunit delta		C:GO:0005832; F:GO:0005524; C:GO:0005813; P:GO:0007339; C:GO:0070062; C:GO:0044297; F:GO:0051082; P:GO:0006457; P:GO:1901998; C:GO:0002199; C:GO:0005654; C:GO:0005874
EduN_176	sonic hedgehog A-like	K06224	P:GO:0044707; P:GO:0044767
EduN_1760	---NA---
EduN_1761	NHP2 1	K12845	F:GO:0003723; C:GO:0030529; P:GO:0042254; C:GO:0005730
EduN_1762	---NA---
EduN_1763	---NA---
EduN_1764	---NA---
EduN_1765	collagen alpha-2(IV) chain-like		P:GO:0050789
EduN_1766	NF-kappaB transcription factor Rel		C:GO:0005634; F:GO:0003677; F:GO:0003700; C:GO:0005737; P:GO:0006355
EduN_1767	---NA---
EduN_1768	von Willebrand factor D and EGF domain-containing -like		C:GO:0016020; C:GO:0016021
EduN_1769	baculoviral IAP repeat-containing 7 isoform X1	K16060	F:GO:0008270; F:GO:0046872
EduN_177	ADP,ATP carrier mitochondrial-like	K05863	P:GO:0055085; F:GO:0003735; C:GO:0016021; C:GO:0005743; F:GO:0005215; P:GO:0006412
EduN_1770	---NA---
EduN_1771	tyramine beta-hydroxylase-like	K00503	F:GO:0016715; F:GO:0005507; F:GO:0003824; C:GO:0016020; C:GO:0016021; P:GO:0055114; F:GO:0004497
EduN_1772	tyramine beta-hydroxylase-like	K00503	F:GO:0016715; F:GO:0005507; F:GO:0003824; C:GO:0016020; C:GO:0016021; P:GO:0055114; F:GO:0004497
EduN_1773	CAAX prenyl protease 1 partial	K06013	C:GO:0005789; P:GO:0030327; C:GO:0005637; P:GO:0006998; C:GO:0070062; F:GO:0046872; P:GO:0071586; C:GO:0016021; F:GO:0008235; F:GO:0004222
EduN_1774	transmembrane 132E-like		C:GO:0016020; C:GO:0016021
EduN_1775	flotillin-1-like isoform X2	K07192
EduN_1776	transcription factor BTF3 homolog 4	K01527
EduN_1777	dynein heavy chain axonemal-like	K10408	F:GO:0016887; F:GO:0005524; F:GO:0003777; C:GO:0030286; P:GO:0007018
EduN_1778	collagen - partial	K06238	C:GO:0005581
EduN_1779	WD40 repeat-containing partial		C:GO:0005634; F:GO:0005515; C:GO:0005737
EduN_178	Dynein heavy chain axonemal	K10408	F:GO:0016887; F:GO:0005524; F:GO:0003777; C:GO:0005858; P:GO:0003341
EduN_1780	---NA---
EduN_1781	Nucleolar GTP-binding 1	K06943	P:GO:0033342; P:GO:0008285; P:GO:0022408; P:GO:0042254; C:GO:0005794; P:GO:0008156; C:GO:0005730; P:GO:0000079; F:GO:0005525; C:GO:0031965; C:GO:0048471; F:GO:0003924; P:GO:0001649; P:GO:0031397; P:GO:0050821; P:GO:0030336
EduN_1782	---NA---
EduN_1783	Coatomer subunit partial		C:GO:0005615; P:GO:0006888; C:GO:0070062; P:GO:0006890; F:GO:0005198; C:GO:0000139; P:GO:0006891; P:GO:0006886; P:GO:0030157; C:GO:0030126
EduN_1784	adenylate kinase 9-like isoform X5	K18533	F:GO:0005524; C:GO:0016021; P:GO:0016310; F:GO:0019205; P:GO:0006139
EduN_1785	receptor-type tyrosine- phosphatase alpha-like	K05695	P:GO:0030182; F:GO:0050839; P:GO:0097105; F:GO:0016791; P:GO:0007157; P:GO:0016311; F:GO:0005102; P:GO:0046426; P:GO:0050775; P:GO:0050776
EduN_1786	---NA---
EduN_1787	---NA---
EduN_1788	Calmodulin	K02183	F:GO:0005509
EduN_1789	---NA---
EduN_179	ATP-dependent RNA helicase A isoform X1		F:GO:0003676; C:GO:0005634; F:GO:0005524; C:GO:0030529; C:GO:0005737; P:GO:0006396; F:GO:0004004
EduN_1790	hydrocephalus-inducing homolog		P:GO:0003341
EduN_1791	---NA---
EduN_1792	---NA---
EduN_1793	gamma-glutamyltranspeptidase 1 isoform X2	K18592	P:GO:0006749; C:GO:0016020
EduN_1794	---NA---
EduN_1795	immunoglobulin superfamily member 10		C:GO:0005604; C:GO:0070062; F:GO:0005509; C:GO:0005938; C:GO:0030054; C:GO:0005576
EduN_1796	---NA---
EduN_1797	---NA---
EduN_1798	nephrocystin-4-like isoform X1		C:GO:0044422; C:GO:0044424; P:GO:0044699
EduN_1799	---NA---
EduN_18	60S ribosomal L18a	K02882	F:GO:0003735; C:GO:0016020; C:GO:0022625; P:GO:0006412
EduN_180	junctional adhesion molecule B		C:GO:0016020; C:GO:0016021
EduN_1800	anamorsin homolog		C:GO:0005737; C:GO:0043231; F:GO:0005488; P:GO:0016226
EduN_1801	Transforming growth factor beta regulator 1		C:GO:0005634
EduN_1802	TBATA-like isoform X1		C:GO:0005634; C:GO:0005829
EduN_1803	L- partial		F:GO:0030414; F:GO:0004869; P:GO:0006508; P:GO:0010951; F:GO:0008234; F:GO:0008233; P:GO:0010466; F:GO:0016787
EduN_1804	CD82 antigen-like		P:GO:0006810
EduN_1805	tetraspanin-1-like isoform X1		C:GO:0016020; C:GO:0016021
EduN_1806	---NA---
EduN_1807	---NA---
EduN_1808	---NA---
EduN_1809	cytoplasmic dynein 1 heavy chain 1-like isoform X2	K10413	F:GO:0000166; F:GO:0016887; F:GO:0005524; F:GO:0003777; C:GO:0030286; P:GO:0007018
EduN_181	---NA---
EduN_1810	golgin subfamily A member 6A-like isoform X1
EduN_1811	---NA---
EduN_1812	---NA---
EduN_1813	dynein heavy chain axonemal-like	K10408	F:GO:0016887; F:GO:0005524; F:GO:0003777; C:GO:0030286; P:GO:0007018
EduN_1814	---NA---
EduN_1815	interferon-related developmental regulator 2
EduN_1816	interferon-related developmental regulator 2		F:GO:0005524; F:GO:0016779; P:GO:0006955; F:GO:0003723; F:GO:0016740
EduN_1817	E3 ubiquitin- ligase Nedd-4 isoform X1	K10591	F:GO:0003677; F:GO:0004842; C:GO:0005634; P:GO:0006355; F:GO:0043565; F:GO:0016874; P:GO:0016567
EduN_1818	---NA---
EduN_1819	---NA---
EduN_182	elongation factor 2	K03234	F:GO:0005525; F:GO:0003746; C:GO:0005737; F:GO:0003924; P:GO:0006414
EduN_1820	---NA---
EduN_1821	sulfide:quinone mitochondrial	K17218	C:GO:0005739
EduN_1822	---NA---
EduN_1823	coiled-coil domain-containing 173-like
EduN_1824	---NA---
EduN_1825	EF-hand domain-containing 1		C:GO:0031514; F:GO:0005509
EduN_1826	EF-hand domain-containing 1		C:GO:0031514; F:GO:0005509
EduN_1827	EF-hand domain-containing 1		F:GO:0005509
EduN_1828	---NA---
EduN_1829	---NA---
EduN_183	heterogeneous nuclear ribonucleo Q isoform X1		F:GO:0000166; F:GO:0003676
EduN_1830	---NA---
EduN_1831	---NA---
EduN_1832	signal recognition particle receptor subunit alpha homolog isoform X2		P:GO:0006810
EduN_1833	lipoma HMGIC fusion partner-like 3
EduN_1834	---NA---
EduN_1835	---NA---
EduN_1836	trithorax group osa-like isoform X1		F:GO:0003677; C:GO:0090544; P:GO:0006338
EduN_1837	---NA---
EduN_1838	transcription factor Sox-2-like	K16796	P:GO:0032502
EduN_1839	---NA---
EduN_184	---NA---
EduN_1840	---NA---
EduN_1841	---NA---
EduN_1842	---NA---
EduN_1843	NDRG3-like isoform X1		C:GO:0005737; P:GO:0007165
EduN_1844	---NA---
EduN_1845	---NA---
EduN_1846	dynein heavy chain axonemal-like	K10408	F:GO:0016887; F:GO:0005524; F:GO:0003777; C:GO:0030286; P:GO:0007018
EduN_1847	1-phosphatidylinositol 3-phosphate 5-kinase-like	K00921	F:GO:0016307; F:GO:0043167; P:GO:0046488; P:GO:0016310
EduN_1848	cell wall integrity and stress response component 4-like		C:GO:0016020; C:GO:0016021
EduN_1849	hypothetical protein GLYMA_13G011700		C:GO:0016020; C:GO:0016021
EduN_185	---NA---
EduN_1850	small heat shock protein 24.1 [Mytilus galloprovincialis]
EduN_1851	---NA---
EduN_1852	---NA---
EduN_1853	aspartate--tRNA partial	K01876	F:GO:0003676; F:GO:0005524; C:GO:0005737; F:GO:0004815; P:GO:0006422
EduN_1854	Short-chain collagen C4		C:GO:0005581
EduN_1855	heterogeneous nuclear ribonucleo K-like isoform X1	K12886	F:GO:0003723; C:GO:0030529; C:GO:0019013
EduN_1856	tetratricopeptide repeat 37	K12600	C:GO:0055087; C:GO:0035327; C:GO:0005654
EduN_1857	---NA---
EduN_1858	---NA---
EduN_1859	HHIP 1		P:GO:0008150; P:GO:0005975; F:GO:0016901; F:GO:0048038; F:GO:0003824; C:GO:0016020; F:GO:0005044; P:GO:0055114; C:GO:0005576; P:GO:0006898
EduN_186	cytospin-A-like isoform X2
EduN_1860	RNA-binding 25 isoform X2	K12822	F:GO:0003676; C:GO:0044428
EduN_1861	X-box-binding 1		F:GO:0003700; P:GO:0006355; F:GO:0043565
EduN_1862	---NA---
EduN_1863	kyphoscoliosis peptidase-like
EduN_1864	ornithine decarboxylase antizyme 1-like		F:GO:0008073; P:GO:0043086
EduN_1865	serine threonine- kinase BRSK2-like		F:GO:0005524; F:GO:0004674; P:GO:0006468
EduN_1866	---NA---
EduN_1867	---NA---
EduN_1868	---NA---
EduN_1869	hypothetical protein CGI_10013935
EduN_187	---NA---
EduN_1870	E3 ubiquitin- ligase RNF213-like		F:GO:0003824
EduN_1871	---NA---
EduN_1872	cilia- and flagella-associated 99-like
EduN_1873	general transcription factor IIF subunit 2	K03139	F:GO:0000991; P:GO:0032968; F:GO:0003677; F:GO:0005524; P:GO:0060261; F:GO:0004386; C:GO:0005674; P:GO:0006367
EduN_1874	Dynein heavy chain axonemal	K10408	F:GO:0016887; F:GO:0005524; P:GO:0007507; C:GO:0036157; F:GO:0003777; P:GO:0021670; P:GO:0030317; P:GO:0036158; P:GO:0003341; P:GO:0007368
EduN_1875	---NA---
EduN_1876	---NA---
EduN_1877	---NA---
EduN_1878	---NA---
EduN_1879	---NA---
EduN_188	laminin subunit alpha-2-like isoform X2 [Mizuhopecten yessoensis]	K05637	P:GO:0050789
EduN_1880	transmembrane 131-like
EduN_1881	transmembrane 2-like		F:GO:0003677; C:GO:0005634; F:GO:0003700; C:GO:0016021; P:GO:0006355; F:GO:0043565
EduN_1882	---NA---
EduN_1883	BTB POZ domain-containing 1-like
EduN_1884	aminopeptidase N isoform X2	K11140	C:GO:0016020; C:GO:0044464; F:GO:0004177; F:GO:0005488; P:GO:0071704; F:GO:0008237
EduN_1885	---NA---
EduN_1886	PREDICTED: uncharacterized protein C1orf228 homolog		C:GO:0005634; C:GO:0005737
EduN_1887	PREDICTED: uncharacterized protein LOC105326108 isoform X5
EduN_1888	proactivator polypeptide-like	K12382	P:GO:0006629; C:GO:0005764; P:GO:0006665
EduN_1889	---NA---
EduN_189	partial	K08770	P:GO:0006283; P:GO:0036297; P:GO:0007179; P:GO:0008543; P:GO:0007254; P:GO:0061418; P:GO:0042059; P:GO:0051092; P:GO:0000187; P:GO:0002755; P:GO:0010939; P:GO:0075733; C:GO:0005829; C:GO:0030666; P:GO:0032480; P:GO:0006296; P:GO:0034220; P:GO:0006294; P:GO:0090263; P:GO:1901796; P:GO:0038061; P:GO:0006297; C:GO:0005886; P:GO:0042787; P:GO:0033209; P:GO:0007219; P:GO:0031145; P:GO:0070911; P:GO:00…
EduN_1890	stress-70 mitochondrial-like	K04043	F:GO:0005524; P:GO:0048856; F:GO:0051082; P:GO:0006457; P:GO:0044767
EduN_1891	ATP synthase-coupling factor mitochondrial-like	K02131	P:GO:0006810
EduN_1892	---NA---
EduN_1893	---NA---
EduN_1894	baculoviral IAP repeat-containing 6-like	K10586	F:GO:0004842; P:GO:0006915; P:GO:0032465; P:GO:0016567
EduN_1895	nucleoredoxin 1		C:GO:0005623; P:GO:0045454
EduN_1896	---NA---
EduN_1897	---NA---
EduN_1898	aldehyde mitochondrial	K00128
EduN_1899	---NA---
EduN_19
EduN_190	PREDICTED: uncharacterized protein LOC105346563
EduN_1900	---NA---
EduN_1901	Proactivator polypeptide		P:GO:0006629; C:GO:0005764; P:GO:0006665
EduN_1902	Alpha-taxilin		F:GO:0019905
EduN_1903	PREDICTED: uncharacterized protein LOC101855718
EduN_1904	deleted in malignant brain tumors 1 -like		F:GO:0005509; C:GO:0016020; F:GO:0005044; P:GO:0006898
EduN_1905	Cytosolic carboxypeptidase 2		F:GO:0008270; F:GO:0004181; P:GO:0006508; P:GO:0035610
EduN_1906	dynein beta ciliary-like		C:GO:0031514; F:GO:0003777; C:GO:0030286; P:GO:0007018
EduN_1907	---NA---
EduN_1908	---NA---
EduN_1909	sperm-tail PG-rich repeat-containing 2-like		P:GO:0008150; C:GO:0005575; F:GO:0003674
EduN_191	Carbohydrate sulfotransferase 15 [Mizuhopecten yessoensis]	K08106	P:GO:0019319; C:GO:0016020; C:GO:0005794; F:GO:0050659; F:GO:0050656
EduN_1910	---NA---
EduN_1911	---NA---
EduN_1912	nucleolar and coiled-body phospho 1	K11294
EduN_1913	---NA---
EduN_1914	---NA---
EduN_1915	Inversin [Crassostrea gigas]		F:GO:0004190; F:GO:0016491; F:GO:0032440; P:GO:0006508; P:GO:0055114
EduN_1916	---NA---
EduN_1917	---NA---
EduN_1918	40S ribosomal partial	K02960	F:GO:0003735; C:GO:0005840; P:GO:0006412
EduN_1919	60 kDa SS-A Ro ribonucleo -like	K11089	F:GO:0034336; C:GO:0044424; P:GO:0044699; P:GO:0009987
EduN_192	sodium/potassium-transporting ATPase subunit alpha-like [Crassostrea virginica]	K01539	P:GO:0006813; F:GO:0005524; P:GO:0006814; F:GO:0005391; F:GO:0046872; P:GO:0090662; C:GO:0016021; P:GO:0010248
EduN_1920	---NA---
EduN_1921	CD151 antigen-like		C:GO:0016020; C:GO:0016021
EduN_1922	Dynein heavy chain axonemal	K10408	F:GO:0000166
EduN_1923	Pancreatic secretory granule membrane major glyco GP2		P:GO:0007160; P:GO:0006836; F:GO:0005328; C:GO:0016020; C:GO:0016021
EduN_1924	---NA---
EduN_1925	retrograde of 51 kDa-like isoform X2		F:GO:0005198; C:GO:0005882
EduN_1926	---NA---
EduN_1927	ankyrin repeat domain-containing partial		P:GO:1900087; P:GO:0043123; P:GO:1900245; P:GO:0051151; P:GO:0006275; F:GO:0003682; P:GO:1900246; C:GO:0000785; P:GO:0042742; C:GO:0005634; F:GO:0003723; F:GO:0005515; C:GO:0005737; P:GO:0001955; P:GO:0045087; C:GO:0016020; P:GO:0016032
EduN_1928	sodium- and chloride-dependent glycine transporter 1-like		P:GO:0006836; F:GO:0005328; P:GO:0055085; C:GO:0016021
EduN_1929	---NA---
EduN_193	---NA---
EduN_1930	---NA---
EduN_1931	---NA---
EduN_1932	centriolin-like isoform X1		P:GO:0044763
EduN_1933	sodium-dependent phosphate transport 2B-like		F:GO:0005315; F:GO:0005436; F:GO:0015321; C:GO:0005903; C:GO:0005737; P:GO:0044341; C:GO:0016021; C:GO:0031982; P:GO:0035725; C:GO:0016324; P:GO:0035435; P:GO:0030643
EduN_1934	---NA---
EduN_1935	myeloid differentiation primary response 88	K04729	P:GO:0002237; F:GO:0005515; P:GO:0002218; P:GO:0007165; P:GO:0045087; P:GO:0030593; P:GO:1901534
EduN_1936	---NA---
EduN_1937	---NA---
EduN_1938	---NA---
EduN_1939	---NA---
EduN_194	60S ribosomal L35a		C:GO:0005622
EduN_1940	hypothetical protein SPPG_08193		P:GO:0045087; C:GO:0016020; C:GO:0016021
EduN_1941	O- case-like	K15719	P:GO:0009100; F:GO:0016231
EduN_1942	---NA---
EduN_1943	eukaryotic translation initiation factor 3 subunit partial		F:GO:0003743; P:GO:0001731; C:GO:0016282; C:GO:0033290; P:GO:0006446; C:GO:0005852
EduN_1944	---NA---
EduN_1945	enteropeptidase isoform X1		P:GO:0006810
EduN_1946	---NA---
EduN_1947	---NA---
EduN_1948	---NA---
EduN_1949	Nuclear receptor subfamily 0 group B member partial		C:GO:0005634; F:GO:0003677; P:GO:0006351; F:GO:0003707; P:GO:0006355; P:GO:0043401
EduN_195	60S ribosomal L35a-like	K02917	P:GO:0043009; P:GO:0030218; F:GO:0003735; P:GO:0002181; P:GO:0042273; C:GO:0022625
EduN_1950	---NA---
EduN_1951	glutamine-rich 2-like isoform X2
EduN_1952	---NA---
EduN_1953	tripartite motif-containing 45-like		F:GO:0008270; F:GO:0046872; F:GO:0016874; C:GO:0005622
EduN_1954	---NA---
EduN_1955	NADH dehydrogenase [ubiquinone] flavo mitochondrial	K03942	C:GO:0005747; F:GO:0010181; F:GO:0051287; F:GO:0008137; F:GO:0051539; P:GO:0009060
EduN_1956	---NA---
EduN_1957	---NA---
EduN_1958	PREDICTED: uncharacterized protein LOC105327914
EduN_1959	prolyl 4-hydroxylase 1-like		F:GO:0031418; F:GO:0005506; F:GO:0016705; P:GO:0055114
EduN_196	---NA---
EduN_1960	---NA---
EduN_1961	---NA---
EduN_1962	galaxin-like isoform X1		C:GO:0005576
EduN_1963	AP-1 complex subunit beta-1-like isoform X1	K12392	P:GO:0016192; P:GO:0010826; C:GO:0016021; C:GO:0030131; F:GO:0008565; C:GO:0036038; P:GO:0006886
EduN_1964	---NA---
EduN_1965	family transcriptional regulator
EduN_1966	---NA---
EduN_1967	---NA---
EduN_1968	---NA---
EduN_1969	---NA---
EduN_197	PREDICTED: zonadhesin-like [Crassostrea gigas]	K01315	P:GO:0042060; F:GO:0070011; P:GO:0051241; P:GO:0030154; P:GO:0050878; C:GO:0005576; F:GO:0005488; C:GO:0019897; P:GO:0001892
EduN_1970	ruvB-like 2		P:GO:0035066; P:GO:0043967; P:GO:0006281; P:GO:0060420; C:GO:0035267; P:GO:0043968; F:GO:0000979; C:GO:0000812; P:GO:0003351; P:GO:0044458; F:GO:0000980; F:GO:0005524; P:GO:0007507; P:GO:0006338; P:GO:0071392; C:GO:0070062; C:GO:0030529; P:GO:0045892; P:GO:0048565; P:GO:0032508; F:GO:0001094; P:GO:0070286; P:GO:0034644; P:GO:0071733; C:GO:0031011; P:GO:0071899; C:GO:0071339; F:GO:0031490; F:GO:00…
EduN_1971	cilia- and flagella-associated 57		C:GO:0016021
EduN_1972	---NA---
EduN_1973	Titin
EduN_1974	GTPase IMAP family member 4-like		F:GO:0005525
EduN_1975	retrovirus-related Pol poly from type-1 retrotransposable element R2		P:GO:0001556; P:GO:0030728; P:GO:0007530; C:GO:0005576; F:GO:0005179
EduN_1976	---NA---
EduN_1977	lingerer-like isoform X2
EduN_1978	putative C1q domain containing protein MgC1q32 [Mytilus galloprovincialis]
EduN_1979	---NA---
EduN_198	dual oxidase 2-like	K13411	F:GO:0004601; P:GO:0006979; F:GO:0005509; P:GO:0019221; C:GO:0016021; P:GO:0098869; P:GO:0051591; P:GO:0031110; P:GO:0055114; P:GO:0006810; P:GO:0042335; F:GO:0020037
EduN_1980	palmitoyltransferase ZDHHC5-like		F:GO:0008270; F:GO:0019706; C:GO:0016021
EduN_1981	C1q domain containing 1q46
EduN_1982	carbonic anhydrase 14-like isoform X3	K01672	F:GO:0046872
EduN_1983	maternal -like
EduN_1984	probable ATP-dependent RNA helicase DDX46	K12811	F:GO:0003676; F:GO:0005524; F:GO:0004386
EduN_1985	Neuronal acetylcholine receptor subunit beta-3		C:GO:0045211; P:GO:0098655; C:GO:0016021; C:GO:0030054; F:GO:0005230
EduN_1986	---NA---
EduN_1987	---NA---
EduN_1988	60S ribosomal L30	K02908	F:GO:0003723; F:GO:0003735; C:GO:0022625; P:GO:0006412
EduN_1989	---NA---
EduN_199	---NA---
EduN_1990	---NA---
EduN_1991	---NA---
EduN_1992	---NA---
EduN_1993	---NA---
EduN_1994	---NA---
EduN_1995	arrestin domain-containing 3-like		P:GO:0007165
EduN_1996	Dynein heavy chain axonemal	K10408	F:GO:0016887; F:GO:0005524; F:GO:0003777; C:GO:0005858; P:GO:0003341; P:GO:0035556; P:GO:0016567
EduN_1997	voltage-dependent calcium channel gamma-2 subunit-like		C:GO:0016020; C:GO:0016021
EduN_1998	---NA---
EduN_1999	gelsolin 2	K05768	F:GO:0003779
EduN_2	beta-tubulin [Pinctada fucata]	K07375	C:GO:0043209; F:GO:0005200; F:GO:0042288; F:GO:0051082; P:GO:0042267; C:GO:0005874; P:GO:0007017; F:GO:0005525; C:GO:0005634; C:GO:0070062; P:GO:0000086; F:GO:0003725; P:GO:0006928; F:GO:0003924; C:GO:0005829
EduN_20
EduN_200	tubulin alpha-3 chain-like	K07374	F:GO:0005525; C:GO:0005737; F:GO:0003924; F:GO:0005200; C:GO:0005874; P:GO:0007017
EduN_2000	outer dense fiber 3-like
EduN_2001	cytosolic phospholipase A2-like isoform X1		P:GO:0008152; P:GO:0009395; F:GO:0004620
EduN_2002	copper zinc superoxide dismutase		P:GO:0006801; F:GO:0046872; P:GO:0055114
EduN_2003	---NA---
EduN_2004	complement C1q 4		C:GO:0016020; C:GO:0016021
EduN_2005	28S ribosomal mitochondrial	K02996	P:GO:0000462; F:GO:0003735; C:GO:0005763; P:GO:0006412
EduN_2006	---NA---
EduN_2007	big defensin 3		P:GO:0050829; C:GO:0016021; P:GO:0050830
EduN_2008	pyruvate dehydrogenase E1 component subunit mitochondrial-like	K00162	P:GO:0006086; F:GO:0004739; P:GO:0055114
EduN_2009	PREDICTED: uncharacterized protein LOC105317975
EduN_201	40S ribosomal S25-like	K02975	C:GO:0005840
EduN_2010	peroxidasin partial		P:GO:0006869; C:GO:0005581; F:GO:0005509; C:GO:0016020; C:GO:0016021; F:GO:0008289; P:GO:0042157; C:GO:0005576
EduN_2011	---NA---
EduN_2012	A Chain Thermodynamic And Structure Guided Design Of Statin Hmg-Coa Reductase Inhibitors	K00021	P:GO:0009790; P:GO:0061179; P:GO:0043407; P:GO:0045908; P:GO:0045445; P:GO:0008542; P:GO:0006743; F:GO:0004420; C:GO:0005789; P:GO:0048661; P:GO:0045471; F:GO:0042282; P:GO:0048643; P:GO:0051262; F:GO:0070402; F:GO:0051721; P:GO:0061045; F:GO:0042803; P:GO:0006695; P:GO:0007584; P:GO:0008299; P:GO:0007568; C:GO:0005778; P:GO:0070374; C:GO:0016021; P:GO:0010666; P:GO:0015936; P:GO:0055114; P:GO:00…
EduN_2013	---NA---
EduN_2014	von Willebrand factor A domain-containing 5A-like		C:GO:0005634; C:GO:0016020; C:GO:0016021; C:GO:0005654
EduN_2015	---NA---
EduN_2016	DD3-3-like
EduN_2017	---NA---
EduN_2018	---NA---
EduN_2019	glutamate receptor kainate 2-like		P:GO:0006811; F:GO:0004888; F:GO:0005230; C:GO:0045202; C:GO:0044425; C:GO:0005886
EduN_202	partial	K08770	P:GO:0006283; P:GO:0036297; P:GO:0007179; P:GO:0008543; P:GO:0007254; P:GO:0061418; P:GO:0042059; P:GO:0051092; P:GO:0000187; P:GO:0002755; P:GO:0010939; P:GO:0075733; C:GO:0005829; C:GO:0030666; P:GO:0032480; P:GO:0006296; P:GO:0034220; P:GO:0006294; P:GO:0090263; P:GO:1901796; P:GO:0038061; P:GO:0006297; C:GO:0005886; P:GO:0042787; P:GO:0033209; P:GO:0007219; P:GO:0031145; P:GO:0070911; P:GO:00…
EduN_2020	Cytadherence high molecular weight 2		F:GO:0008061; P:GO:0006030; C:GO:0016021; C:GO:0005576
EduN_2021	---NA---
EduN_2022	Proteasome subunit alpha type-3	K02727	C:GO:0005634; C:GO:0005737; C:GO:0019773; F:GO:0004298; P:GO:0006511
EduN_2023	---NA---
EduN_2024	Fructose-bisphosphate aldolase	K01623	P:GO:0006096; F:GO:0004332
EduN_2025	---NA---
EduN_2026	serine threonine- phosphatase alpha-2 isoform	K06269	F:GO:0004721; F:GO:0046872; P:GO:0006470
EduN_2027	PREDICTED: uncharacterized protein LOC105318293
EduN_2028	---NA---
EduN_2029	---NA---
EduN_203	FRAS1-related extracellular matrix 1-like		C:GO:0016020; P:GO:0007155
EduN_2030	---NA---
EduN_2031	titin-like isoform X10		P:GO:0007165
EduN_2032	---NA---
EduN_2033	---NA---
EduN_2034	---NA---
EduN_2035	---NA---
EduN_2036	---NA---
EduN_2037	---NA---
EduN_2038	WD repeat-containing KIAA1875-like
EduN_2039	Proactivator partial	K12382	P:GO:0044699; P:GO:0009987
EduN_204	eukaryotic translation initiation factor 3 subunit M-like		F:GO:0003743; P:GO:0002183; C:GO:0070993; C:GO:0005852
EduN_2040	dystroglycan-like		P:GO:0002009; F:GO:0005509; C:GO:0016010; C:GO:0016021; C:GO:0044421; P:GO:0022008; P:GO:0048468; P:GO:0048523; F:GO:0008092; C:GO:0042995; P:GO:0007016; P:GO:2000026
EduN_2041	dedicator of cytokinesis 1-like	K12367	P:GO:0007010; P:GO:0007264; F:GO:0005085; F:GO:0005096; P:GO:0016477; C:GO:0005622; P:GO:0043547
EduN_2042	---NA---
EduN_2043	---NA---
EduN_2044	---NA---
EduN_2045	cat eye syndrome critical region 5-like
EduN_2046	---NA---
EduN_2047	guanine nucleotide-binding subunit beta	K04536	F:GO:0005516; C:GO:0005737; P:GO:0007165; F:GO:0004871
EduN_2048	maestro heat-like repeat-containing family member 1 isoform X2		F:GO:0005509; C:GO:0016020; P:GO:0007156
EduN_2049	PREDICTED: uncharacterized protein LOC105336020
EduN_205	Beta-hexosaminidase [Crassostrea gigas]		P:GO:0005975; F:GO:0004553; F:GO:0030246; F:GO:0004563; F:GO:0030247
EduN_2050	---NA---
EduN_2051	mu class glutathione S-transferase	K00799	P:GO:0008152; F:GO:0004364
EduN_2052	Vigilin		F:GO:0003676; F:GO:0003723
EduN_2053	---NA---
EduN_2054	hypothetical protein CGI_10028383		C:GO:0016020; C:GO:0016021
EduN_2055	---NA---
EduN_2056	---NA---
EduN_2057	---NA---
EduN_2058	---NA---
EduN_2059	dystonin-like isoform X1		F:GO:0016887; P:GO:0007050; F:GO:0003779; F:GO:0005509; P:GO:0016055; F:GO:0008017
EduN_206	Alpha-actinin, sarcomeric [Crassostrea gigas]	K05699	F:GO:0051015; P:GO:0051764; F:GO:0005509; P:GO:0051017
EduN_2060	RTF2 homolog		C:GO:0005634; P:GO:1902979
EduN_2061	PREDICTED: sperm motility kinase [Crassostrea gigas]		F:GO:0016301; P:GO:0009987
EduN_2062	---NA---
EduN_2063	---NA---
EduN_2064	---NA---
EduN_2065	---NA---
EduN_2066	---NA---
EduN_2067	secernin-2-like		F:GO:0016805; P:GO:0006508; P:GO:0006887
EduN_2068	Acidic mammalian chitinase	K01183	P:GO:0071704; F:GO:0016798
EduN_2069	hypothetical protein CGI_10022520
EduN_207	---NA---
EduN_2070	---NA---
EduN_2071	---NA---
EduN_2072	---NA---
EduN_2073	fibrillin-2-like isoform X1		P:GO:0007160; F:GO:0004888; P:GO:0007165; F:GO:0005509; C:GO:0016020; C:GO:0016021; F:GO:0005201; C:GO:0005578
EduN_2074	dolichyl-diphosphooligosaccharide-- glycosyltransferase subunit 2-like	K12667	C:GO:0008250; F:GO:0004579; C:GO:0016021; P:GO:0006487
EduN_2075	---NA---
EduN_2076	---NA---
EduN_2077	---NA---
EduN_2078	---NA---
EduN_2079	egg surface -1	K04808	C:GO:0016020
EduN_208	---NA---
EduN_2080	ABC transporter F family member 4-like
EduN_2081	---NA---
EduN_2082	KH domain- RNA- signal transduction-associated 2-like		F:GO:0003676; F:GO:0003723
EduN_2083	androglobin-like isoform X2		F:GO:0019825; P:GO:0006508; F:GO:0004198; C:GO:0005622; F:GO:0020037
EduN_2084	farnesyltransferase geranylgeranyltransferase type-1 subunit alpha-like		C:GO:0005965; C:GO:0005953; P:GO:0018343; F:GO:0004660; P:GO:0018344; F:GO:0004662
EduN_2085	---NA---
EduN_2086	baculoviral IAP repeat-containing 1 isoform X1	K12807
EduN_2087	---NA---
EduN_2088	---NA---
EduN_2089	---NA---
EduN_209	---NA---
EduN_2090	---NA---
EduN_2091	---NA---
EduN_2092	---NA---
EduN_2093	---NA---
EduN_2094	---NA---
EduN_2095	heat shock 70 kDa 12A-like		C:GO:0016020
EduN_2096	---NA---
EduN_2097	---NA---
EduN_2098	---NA---
EduN_2099	---NA---
EduN_21	novel sal partial		C:GO:0016021
EduN_210	---NA---
EduN_2100	---NA---
EduN_2101	G1 S-specific cyclin-D3		F:GO:0019901; P:GO:0045737; P:GO:0007165; C:GO:0000307; F:GO:0004693; P:GO:0007049; C:GO:0005886; C:GO:0005634; C:GO:0005925; C:GO:0005737; P:GO:0042098; P:GO:0001934; P:GO:0051726
EduN_2102	E3 ubiquitin- ligase HUWE1-like isoform X1	K10592	F:GO:0003824; C:GO:0016020
EduN_2103	---NA---
EduN_2104	trans-L-3-hydroxyproline dehydratase-like	K18384	F:GO:0016836; P:GO:0008152; F:GO:0018112
EduN_2105	CD63 antigen-like	K06497	C:GO:0016020; C:GO:0016021
EduN_2106	vacuolar sorting-associated 16 homolog		P:GO:0032889; C:GO:0005768; P:GO:0035542; F:GO:0003779; P:GO:0007033; P:GO:0016197; P:GO:0006886; C:GO:0005765; C:GO:0030897
EduN_2107	RNA-directed DNA polymerase from mobile element jockey- partial
EduN_2108	---NA---
EduN_2109	---NA---
EduN_211	beta tubulin partial	K07375	F:GO:0005525; F:GO:0003924; F:GO:0005200; C:GO:0005874; P:GO:0007017
EduN_2110	otoferlin-like isoform X2		C:GO:0098793; F:GO:0005509; C:GO:0016021; C:GO:0005829; P:GO:0016079
EduN_2111	isocitrate dehydrogenase	K00031	F:GO:0000287; C:GO:0005777; C:GO:0070062; F:GO:0051287; F:GO:0004450; C:GO:0005829; P:GO:0006102; P:GO:0006099; C:GO:0005743
EduN_2112	---NA---
EduN_2113	---NA---
EduN_2114	coatomer subunit beta		P:GO:0016192; F:GO:0005198; C:GO:0000139; P:GO:0006886; C:GO:0030126
EduN_2115	hydrocephalus-inducing homolog		P:GO:0003341
EduN_2116	---NA---
EduN_2117	---NA---
EduN_2118	myosin heavy striated muscle-like
EduN_2119	apoptosis-inducing factor 3 isoform X1		C:GO:0005623; F:GO:0016491; F:GO:0046872; F:GO:0050660; P:GO:0045454; P:GO:0055114; F:GO:0051537
EduN_212	putative tubulin beta 2 [Taeniopygia guttata]	K07375	F:GO:0005525; C:GO:0005737; F:GO:0003924; F:GO:0005200; C:GO:0005874; P:GO:0007017
EduN_2120	---NA---
EduN_2121	glutathione peroxidase 3	K00432	P:GO:0006979; F:GO:0004602; P:GO:0098869; P:GO:0055114; F:GO:0016798
EduN_2122	---NA---
EduN_2123	mitochondrial enolase superfamily member 1-like	K18334	P:GO:0009063; F:GO:0003824
EduN_2124	---NA---
EduN_2125	adenylyl cyclase-associated 1		F:GO:0003779; P:GO:0000902; P:GO:0030036
EduN_2126	---NA---
EduN_2127	---NA---
EduN_2128	leucine-rich repeat-containing 74A-like		F:GO:0005509
EduN_2129	ATP synthase subunit mitochondrial-like	K02136	C:GO:0045261; F:GO:0046961; P:GO:0015986; F:GO:0046933
EduN_213	beta tubulin partial	K07375	F:GO:0005525; F:GO:0003924; F:GO:0005200; C:GO:0005874; P:GO:0007017
EduN_2130	---NA---
EduN_2131	membrane progestin receptor beta-like		P:GO:0007165; P:GO:0048477; C:GO:0016020; P:GO:0019220; P:GO:0050790; F:GO:0008289; P:GO:0048545; P:GO:0080090
EduN_2132	---NA---
EduN_2133	60S ribosomal L23	K02894	F:GO:0003735; P:GO:0002181; F:GO:0017022; P:GO:0022008; C:GO:0022625; F:GO:0070180
EduN_2134	---NA---
EduN_2135	EF-hand calcium-binding domain-containing 5-like isoform X1		F:GO:0005509
EduN_2136	---NA---
EduN_2137	LKAAEAR1 isoform X2
EduN_2138	Dynein heavy chain axonemal	K10408	F:GO:0016887; F:GO:0005524; F:GO:0003777; F:GO:0003779; C:GO:0030286; P:GO:0016310; P:GO:0007018; F:GO:0016301
EduN_2139	---NA---
EduN_214	beta tubulin	K07375	F:GO:0005525; F:GO:0003924; F:GO:0005200; C:GO:0005874; P:GO:0007017
EduN_2140	dynein heavy chain axonemal-like	K10408	F:GO:0016887; F:GO:0005524; F:GO:0003777; F:GO:0046872; C:GO:0030286; P:GO:0007018
EduN_2141	copper zinc superoxide dismutase		P:GO:0008152
EduN_2142	---NA---
EduN_2143	balbiani ring 3-like		F:GO:0008270
EduN_2144	---NA---
EduN_2145	Dynein heavy chain axonemal	K10408	F:GO:0016887; F:GO:0005524; F:GO:0003777; C:GO:0030286; P:GO:0007018
EduN_2146	radial spoke head 9 homolog		C:GO:0031514; F:GO:0005515; P:GO:0060294; P:GO:0035082; P:GO:0044458; C:GO:0005930
EduN_2147	---NA---
EduN_2148	---NA---
EduN_2149	hemicentin-1-like isoform X1		C:GO:0016020; C:GO:0016021
EduN_215	---NA---
EduN_2150	---NA---
EduN_2151	hydrocephalus-inducing homolog		P:GO:0003341
EduN_2152	---NA---
EduN_2153	Uncharacterized protein BN871_AB_00820
EduN_2154	armadillo repeat-containing 3-like isoform X1		C:GO:0000221; C:GO:0005634; P:GO:0015991; F:GO:0016820
EduN_2155	homeobox six1-like	K15614	P:GO:0008283; C:GO:0005634; F:GO:0003700; P:GO:0051146; P:GO:0007519; P:GO:0006915; P:GO:0007399; P:GO:0006355; F:GO:0043565; P:GO:0048468; P:GO:0007423
EduN_2156	---NA---
EduN_2157	hydrocephalus-inducing homolog		P:GO:0003341
EduN_2158	opine dehydrogenase-like		F:GO:0050662; P:GO:0055114; F:GO:0047830
EduN_2159	E3 ubiquitin- ligase MYCBP2 isoform X2		F:GO:0008270; F:GO:0016874
EduN_216	beta-tubulin	K07375	F:GO:0005525; C:GO:0005737; F:GO:0003924; F:GO:0005200; C:GO:0005874; P:GO:0007017; P:GO:0007435
EduN_2160	roundabout homolog 3	K06754	C:GO:0044425; P:GO:0044699
EduN_2161	fibrillin-2-like isoform X2		P:GO:0007160; F:GO:0005509; C:GO:0016020; C:GO:0016021; F:GO:0005201; C:GO:0005578
EduN_2162	dynein heavy chain axonemal	K10408	F:GO:0000166; P:GO:0007275; C:GO:0030286; F:GO:0017111; P:GO:0007018; C:GO:0005930
EduN_2163	---NA---
EduN_2164	---NA---
EduN_2165	---NA---
EduN_2166	coiled-coil domain-containing 153-like		P:GO:0008150; F:GO:0009055; C:GO:0005575; F:GO:0003674
EduN_2167	---NA---
EduN_2168	---NA---
EduN_2169	---NA---
EduN_217	beta tubulin	K07375	F:GO:0005525; C:GO:0005737; F:GO:0003924; F:GO:0005200; C:GO:0005874; P:GO:0007017; P:GO:0007435
EduN_2170	heat shock 70 kDa 12A-like		F:GO:0000166; F:GO:0005524; C:GO:0016020; C:GO:0016021
EduN_2171	---NA---
EduN_2172	---NA---
EduN_2173	dynein gamma flagellar outer arm-like	K10408	F:GO:0005524; F:GO:0003777; C:GO:0030286; P:GO:0007018
EduN_2174	probable deferrochelatase peroxidase		F:GO:0004601; P:GO:0098869; P:GO:0055114; F:GO:0020037
EduN_2175	---NA---
EduN_2176	zinc finger MIZ domain-containing 1-like isoform X1		F:GO:0008270
EduN_2177	Collagen alpha-1(IX) chain		C:GO:0005581
EduN_2178	---NA---
EduN_2179	dynein heavy chain axonemal-like	K10408	F:GO:0016887; F:GO:0005524; F:GO:0003777; F:GO:0003779; C:GO:0030286; P:GO:0016310; P:GO:0007018; F:GO:0016301
EduN_218	---NA---
EduN_2180	TQXA domain-containing	K16629	P:GO:0007517; C:GO:0005604; P:GO:0002119; P:GO:0009792; P:GO:0030198; P:GO:0050714
EduN_2181	sodium- and chloride-dependent neutral and basic amino acid transporter B(0+)-like isoform X3		P:GO:0006836; F:GO:0005328; P:GO:0055085; C:GO:0016021
EduN_2182	---NA---
EduN_2183	innexin unc-9-like isoform X1		C:GO:0005921; P:GO:0006811; C:GO:0016021; C:GO:0005886
EduN_2184	---NA---
EduN_2185	---NA---
EduN_2186	---NA---
EduN_2187	E3 ubiquitin- ligase HUWE1-like isoform X1	K10592	F:GO:0004842; F:GO:0008270; C:GO:0016021; F:GO:0016874; P:GO:0016567
EduN_2188	PREDICTED: uncharacterized protein LOC105340527
EduN_2189	zinc finger partial		F:GO:0046872
EduN_219	Cytadherence high molecular weight 2		F:GO:0008061; P:GO:0006030; C:GO:0016021; C:GO:0005576
EduN_2190	---NA---
EduN_2191	---NA---
EduN_2192	PREDICTED: uncharacterized protein C9orf117 homolog
EduN_2193	E3 ubiquitin- ligase Midline-1-like		F:GO:0008270; F:GO:0046872; C:GO:0005622
EduN_2194	---NA---
EduN_2195	BSD domain-containing 1-like
EduN_2196	von Willebrand factor D and EGF domain-containing -like		F:GO:0005509; C:GO:0016020; C:GO:0016021
EduN_2197	---NA---
EduN_2198	---NA---
EduN_2199	---NA---
EduN_22	novel sal partial		C:GO:0016020
EduN_220	---NA---
EduN_2200	---NA---
EduN_2201	---NA---
EduN_2202	Stonustoxin subunit alpha		F:GO:0005525
EduN_2203	---NA---
EduN_2204	---NA---
EduN_2205	acylglycerol mitochondrial	K09881	F:GO:0016773; F:GO:0016301; P:GO:0044237
EduN_2206	T-complex 1 subunit gamma-like		F:GO:0005524; C:GO:0005737; F:GO:0051082; P:GO:0006457
EduN_2207	sperm-associated antigen 6
EduN_2208	pre-mRNA-splicing factor ATP-dependent RNA helicase PRP16-like	K12815	F:GO:0003676; F:GO:0005524; C:GO:0005737; C:GO:0005681; F:GO:0004004; P:GO:0000398
EduN_2209	---NA---
EduN_221	cystine glutamate transporter		C:GO:0016020; P:GO:0006865
EduN_2210	---NA---
EduN_2211	---NA---
EduN_2212	---NA---
EduN_2213	---NA---
EduN_2214	hypothetical protein NTHI1209_00002
EduN_2215	---NA---
EduN_2216	ATP-dependent RNA helicase partial		F:GO:0005524; F:GO:0003723; C:GO:0016020; P:GO:0010501; C:GO:0005730; F:GO:0004004
EduN_2217	secreted {ECO:0000313		C:GO:0016020; C:GO:0016021
EduN_2218	---NA---
EduN_2219	T-complex 1 subunit alpha-like		F:GO:0005524; C:GO:0005737; F:GO:0051082; P:GO:0006457
EduN_222	---NA---
EduN_2220	---NA---
EduN_2221	---NA---
EduN_2222	nuclear valosin-containing -like		F:GO:0005524
EduN_2223	cystathionine beta-synthase-like	K01697	C:GO:0005737; C:GO:0016020; P:GO:0019343; F:GO:0004122; P:GO:0006535
EduN_2224	---NA---
EduN_2225	---NA---
EduN_2226	perlucin isoform X3		C:GO:0016020
EduN_2227	---NA---
EduN_2228	---NA---
EduN_2229	Peptidyl-prolyl cis-trans isomerase E	K09564	F:GO:0000166; F:GO:0003755; F:GO:0003723; P:GO:0000413; P:GO:0006457
EduN_223	---NA---
EduN_2230	---NA---
EduN_2231	golgin subfamily A member 6 10		P:GO:0042981
EduN_2232	3 beta-hydroxysteroid dehydrogenase Delta 5--		F:GO:0003824
EduN_2233	---NA---
EduN_2234	---NA---
EduN_2235	FCNV1_VARKO ame: Full=Veficolin-1 Flags: partial		C:GO:0005576
EduN_2236	fibrinogen C domain-containing 1-like isoform X2
EduN_2237	Chitin synthase 1	K00698	C:GO:0016459; F:GO:0005524; F:GO:0016758; F:GO:0003779; C:GO:0016021; F:GO:0003774
EduN_2238	---NA---
EduN_2239	---NA---
EduN_224	Ropporin-1		P:GO:0007286
EduN_2240	---NA---
EduN_2241	baculoviral IAP repeat-containing 2-like
EduN_2242	---NA---
EduN_2243	cilia- and flagella-associated 53-like		P:GO:0006281; P:GO:0060287; F:GO:0003887; C:GO:0097546; P:GO:0071897; F:GO:0003684; C:GO:0005930
EduN_2244	putative C1q domain containing protein MgC1q91 [Mytilus galloprovincialis]		C:GO:0016020; C:GO:0016021; F:GO:0030246
EduN_2245	---NA---
EduN_2246	---NA---
EduN_2247	---NA---
EduN_2248	Eukaryotic translation initiation factor 3 subunit C	K03252	F:GO:0003743; P:GO:0001731; C:GO:0016282; C:GO:0033290; F:GO:0031369; P:GO:0006446; C:GO:0005852
EduN_2249	---NA---
EduN_225	translationally-controlled tumor		P:GO:0070193; C:GO:0005737; P:GO:0007130; C:GO:0000795
EduN_2250	---NA---
EduN_2251	PREDICTED: uncharacterized protein LOC105319406
EduN_2252	PREDICTED: uncharacterized protein LOC105319406
EduN_2253	PREDICTED: uncharacterized protein LOC106072951
EduN_2254	hematopoietic prostaglandin D synthase-like	K04097	F:GO:0016740; F:GO:0005212
EduN_2255	msx2-interacting -like isoform X1		F:GO:0000166; F:GO:0003676
EduN_2256	asparagine--tRNA cytoplasmic	K01893	F:GO:0003676; F:GO:0005524; C:GO:0005737; F:GO:0004816; P:GO:0006421
EduN_2257	lysine-specific demethylase 3A-like isoform X3		F:GO:0008168; P:GO:0032259
EduN_2258	leucine-rich repeat-containing 34-like isoform X1
EduN_2259	titin-like isoform X1	K12567	F:GO:0000166; P:GO:0016310; F:GO:0016301
EduN_226	---NA---
EduN_2260	---NA---
EduN_2261	kinesin KIF28P		F:GO:0005524; F:GO:0003777; C:GO:0016020; P:GO:0007018; F:GO:0008017
EduN_2262	---NA---
EduN_2263	---NA---
EduN_2264	---NA---
EduN_2265	---NA---
EduN_2266	---NA---
EduN_2267	---NA---
EduN_2268	---NA---
EduN_2269	---NA---
EduN_227	c-binding -like		F:GO:0008061; P:GO:0007165; F:GO:0005509; P:GO:0006030; C:GO:0016020; F:GO:0005044; F:GO:0030246; C:GO:0005576; P:GO:0006898
EduN_2270	---NA---
EduN_2271	cubilin		C:GO:0044464; F:GO:0005488; P:GO:0044699
EduN_2272	---NA---
EduN_2273	---NA---
EduN_2274	---NA---
EduN_2275	nuclear MDM1-like isoform X1		C:GO:0005579; P:GO:0006955; P:GO:0046600; F:GO:0008017
EduN_2276	---NA---
EduN_2277	sodium potassium-transporting ATPase subunit beta-2	K01540	P:GO:0006813; P:GO:0006814; C:GO:0016020; C:GO:0016021; C:GO:0005890
EduN_2278	dynein heavy chain axonemal	K10408	F:GO:0016887; F:GO:0005524; F:GO:0003777; C:GO:0030286; P:GO:0007018
EduN_2279	---NA---
EduN_228	---NA---
EduN_2280	U2 snRNP splicing small	K12836	F:GO:0097159; F:GO:1901363
EduN_2281	splicing factor U2AF 35 kDa subunit isoform X2	K12836	F:GO:0000166; C:GO:0089701; F:GO:0003723; C:GO:0071013; P:GO:1903146; F:GO:0046872; C:GO:0016607; C:GO:0016021; F:GO:0050733; P:GO:0006535; P:GO:1903955; P:GO:0000398
EduN_2282	hillarin-like [Crassostrea virginica]		F:GO:0008270
EduN_2283	---NA---
EduN_2284	---NA---
EduN_2285	Fibrocystin-L		C:GO:0016020; C:GO:0016021
EduN_2286	---NA---
EduN_2287	---NA---
EduN_2288	cytochrome P450 2U1	K07419	F:GO:0008395; F:GO:0005488
EduN_2289	---NA---
EduN_229	fibril-forming collagen alpha chain-like [Crassostrea virginica]	K19720	C:GO:0005581; F:GO:0005201; C:GO:0005578
EduN_2290	---NA---
EduN_2291	---NA---
EduN_2292	---NA---
EduN_2293	---NA---
EduN_2294	seleno N		C:GO:0005789; F:GO:0016491; P:GO:0048741; F:GO:0005509; C:GO:0016021; P:GO:0055114
EduN_2295	glyoxylate reductase hydroxypyruvate reductase-like	K00049	F:GO:0016616; F:GO:0051287; P:GO:0055114
EduN_2296	Phthiotriol phenolphthiotriol dimycocerosates methyltransferase 1		F:GO:0016740
EduN_2297	---NA---
EduN_2298	calmodulin	K02183	P:GO:0046716; P:GO:0007099; P:GO:0006468; C:GO:0005875; C:GO:0005654; P:GO:0007605; F:GO:0005509; P:GO:0051383; P:GO:0007608; C:GO:0031475; C:GO:0005829; C:GO:0031476; P:GO:0030048; P:GO:2001020; P:GO:0035071; C:GO:0005886; P:GO:0051533; C:GO:0097431; P:GO:0016060; P:GO:0016061; P:GO:0072499; C:GO:0005814; P:GO:0016062; P:GO:0042052; P:GO:0046331; P:GO:2001259; C:GO:0030496; C:GO:0016028; F:GO:00…
EduN_2299	---NA---
EduN_23	nacre protein [Pinctada fucata]
EduN_230	Ornithine decarboxylase	K01581	F:GO:0003824; P:GO:0006596
EduN_2300	NADH-ubiquinone oxidoreductase 75 kDa mitochondrial-like	K03934	C:GO:0005747; F:GO:0009055; F:GO:0008137; P:GO:0042773; F:GO:0051536
EduN_2301	beta-taxilin		F:GO:0019905; C:GO:0005737
EduN_2302	stress-associated endoplasmic reticulum 2		C:GO:0005789; F:GO:0005515; P:GO:0030968; P:GO:0015031; C:GO:0016021; P:GO:0006486
EduN_2303	caspase-3		P:GO:0048731; P:GO:0006915; F:GO:0004175; P:GO:0030154; F:GO:0008234; P:GO:0048523; P:GO:0050896
EduN_2304	von Willebrand factor D and EGF domain-containing
EduN_2305	---NA---
EduN_2306	---NA---
EduN_2307	---NA---
EduN_2308	tyramine beta-hydroxylase-like	K00503	F:GO:0003824
EduN_2309	MOXD1 homolog 1-like isoform X3		F:GO:0016715; F:GO:0005507; F:GO:0003824; C:GO:0016020; C:GO:0016021; P:GO:0055114; F:GO:0004497
EduN_231	---NA---
EduN_2310	tyramine beta-hydroxylase-like		F:GO:0003824; C:GO:0016020; P:GO:0006810
EduN_2311	---NA---
EduN_2312	rRNA intron-encoded homing		P:GO:0090305; F:GO:0004519
EduN_2313	lipoma HMGIC fusion partner-like 4		C:GO:0016020; C:GO:0016021
EduN_2314	serrate RNA effector molecule homolog isoform X1		F:GO:0000166
EduN_2315	---NA---
EduN_2316	---NA---
EduN_2317	---NA---
EduN_2318	coiled-coil domain-containing 83-like
EduN_2319	proteoglycan 4-like
EduN_232	---NA---
EduN_2320	lectin subunit alpha-like isoform X1		P:GO:0008152; F:GO:0005488
EduN_2321	---NA---
EduN_2322	AP-2 complex subunit mu	K11826	P:GO:0007293; P:GO:0016183; C:GO:0008021; F:GO:0008565; F:GO:0008289; C:GO:0030122; P:GO:0060429; P:GO:0006886; P:GO:0007269; P:GO:0033227
EduN_2323	---NA---
EduN_2324	---NA---
EduN_2325	---NA---
EduN_2326	---NA---
EduN_2327	microfibril-associated glyco 4-like	K06252
EduN_2328	THAP domain-containing 4		F:GO:0003676
EduN_2329	---NA---
EduN_233	tubulin alpha-1C chain- partial	K07374	F:GO:0005525; C:GO:0043209; C:GO:0070062; F:GO:0031625; F:GO:0003725; F:GO:0003924; P:GO:0071353; F:GO:0005200; C:GO:0005881; P:GO:0000226
EduN_2330	---NA---
EduN_2331	egg surface -1		F:GO:0015464; P:GO:0007274; P:GO:0006461; P:GO:0007399; F:GO:0005230; P:GO:0042221; P:GO:0007166; C:GO:0045202; P:GO:0007610; C:GO:0044459; F:GO:0005515; P:GO:0042391; P:GO:0006937; C:GO:0016021
EduN_2332	forkhead-associated domain-containing 1-like
EduN_2333	---NA---
EduN_2334	---NA---
EduN_2335	---NA---
EduN_2336	GTPase IMAP family member 4-like		F:GO:0005525; F:GO:0046872
EduN_2337	---NA---
EduN_2338	---NA---
EduN_2339	PREDICTED: uncharacterized protein LOC105318289 isoform X4
EduN_234	tubulin alpha-1C chain- partial	K07374	F:GO:0005525; C:GO:0043209; C:GO:0070062; F:GO:0031625; F:GO:0003725; F:GO:0003924; P:GO:0071353; F:GO:0005200; C:GO:0005881; P:GO:0000226
EduN_2340	PREDICTED: uncharacterized protein LOC105347168		F:GO:0005509
EduN_2341	PREDICTED: uncharacterized protein LOC106153608		F:GO:0005509
EduN_2342	PREDICTED: uncharacterized protein LOC105344135
EduN_2343	---NA---
EduN_2344	---NA---
EduN_2345	---NA---
EduN_2346	PREDICTED: uncharacterized protein LOC105342521
EduN_2347	proteasome subunit alpha type-7-like	K02731	C:GO:1990111; C:GO:0005634; F:GO:0042802; C:GO:0070062; C:GO:0005737; C:GO:0019773; F:GO:0004298; P:GO:0006511
EduN_2348	MAM and LDL-receptor class A domain-containing 2-like		C:GO:0016020; P:GO:0006508; C:GO:0016021; F:GO:0005044; F:GO:0004252; C:GO:0005576; P:GO:0006898
EduN_2349	AT-rich interactive domain-containing 2-like isoform X1		F:GO:0003677; F:GO:0046872; P:GO:0006355
EduN_235	tubulin alpha chain-like	K07374	F:GO:0005525; F:GO:0015631; F:GO:0042626; P:GO:0055085; C:GO:0005737; F:GO:0003924; F:GO:0005200; C:GO:0005874; P:GO:0007017
EduN_2350	---NA---
EduN_2351	PREDICTED: neuronal acetylcholine receptor subunit alpha-4-like [Saccoglossus kowalevskii]	K04807	P:GO:0006811; P:GO:0007268; C:GO:0044425; C:GO:0005886; P:GO:0050896
EduN_2352	---NA---
EduN_2353	---NA---
EduN_2354	---NA---
EduN_2355	cathepsin L1-like	K01365	F:GO:0008233
EduN_2356	---NA---
EduN_2357	---NA---
EduN_2358	Myosin-2 heavy chain		C:GO:0016020
EduN_2359	---NA---
EduN_236	nuclear pore complex Nup205- partial	K14310	P:GO:0006999; C:GO:0016020; C:GO:0031981; F:GO:0017056; C:GO:0044611; P:GO:0000059
EduN_2360	---NA---
EduN_2361	von Willebrand factor A domain-containing 3B
EduN_2362	von Willebrand factor D and EGF domain-containing -like
EduN_2363	15 kDa seleno -like		F:GO:0016740
EduN_2364	chromodomain-helicase-DNA-binding 4-like isoform X2	K11643	F:GO:0003677; F:GO:0005524; P:GO:0007051; F:GO:0008270; P:GO:0051297; C:GO:0016581; F:GO:0008026; P:GO:0006355; P:GO:0006325
EduN_2365	---NA---
EduN_2366	dolichyl-diphosphooligosaccharide-- glycosyltransferase subunit STT3A	K07151	C:GO:0008250; F:GO:0004579; F:GO:0005524; C:GO:0016021; F:GO:0004672; P:GO:0018279; P:GO:0006468; P:GO:0043687
EduN_2367	---NA---
EduN_2368	dopamine beta-hydroxylase-like		F:GO:0016715; P:GO:0007165; P:GO:0034220; F:GO:0004890; F:GO:0005230; C:GO:0045202; F:GO:0004497; P:GO:0006810; C:GO:0005886; F:GO:0005216; P:GO:0006811; F:GO:0005507; F:GO:0003824; C:GO:0016020; C:GO:0016021; C:GO:0030054; P:GO:0055114
EduN_2369	tyramine beta-hydroxylase-like		F:GO:0004497
EduN_237	---NA---
EduN_2370	---NA---
EduN_2371	heat shock 70 kDa 12A-like
EduN_2372	coiled-coil domain-containing 173-like
EduN_2373	---NA---
EduN_2374	arginine-glutamic acid dipeptide repeats -like isoform X1
EduN_2375	---NA---
EduN_2376	---NA---
EduN_2377	---NA---
EduN_2378	---NA---
EduN_2379	---NA---
EduN_238	PREDICTED: uncharacterized protein LOC105327667
EduN_2380	Solute carrier organic anion transporter family member 4C1		C:GO:0005887; P:GO:0043252; F:GO:0015347
EduN_2381	coiled-coil domain-containing 166-like
EduN_2382	---NA---
EduN_2383	---NA---
EduN_2384	axonemal dynein light chain domain-containing 1-like isoform X1		F:GO:0008270; F:GO:0046872; F:GO:0004089; P:GO:0006730
EduN_2385	eukaryotic translation initiation factor 3 subunit B-like	K03253	F:GO:0000166; F:GO:0003743; F:GO:0016757; P:GO:0001731; C:GO:0016282; P:GO:0006508; C:GO:0033290; F:GO:0031369; P:GO:0006446; C:GO:0005852
EduN_2386	---NA---
EduN_2387	---NA---
EduN_2388	---NA---
EduN_2389	---NA---
EduN_239	60S ribosomal L7a	K02936	P:GO:0042254; C:GO:0005840
EduN_2390	---NA---
EduN_2391	mechanosensory 2-like isoform X1		C:GO:0016021
EduN_2392	mechanosensory 2		C:GO:0016021
EduN_2393	---NA---
EduN_2394	---NA---
EduN_2395	---NA---
EduN_2396	60S ribosomal L21	K02889	P:GO:0019083; F:GO:0003723; F:GO:0005515; P:GO:0006614; F:GO:0003735; P:GO:0000184; C:GO:0016020; C:GO:0022625; P:GO:0006364; C:GO:0005730; P:GO:0006413
EduN_2397	GW182		F:GO:0000166; F:GO:0003676
EduN_2398	---NA---
EduN_2399	rho GTPase-activating 17-like isoform X7
EduN_24	PREDICTED: collagen alpha-1(III) chain-like [Aplysia californica]	K06236	P:GO:0048568; C:GO:0031012; P:GO:0048705; P:GO:0009888
EduN_240	60S ribosomal L7a	K02936	F:GO:0003723; P:GO:0000470; C:GO:0022625; P:GO:0006412
EduN_2400	---NA---
EduN_2401	EH domain-containing 3		C:GO:0016020
EduN_2402	tubulin polyglutamylase TTLL5-like isoform X9
EduN_2403	---NA---
EduN_2404	desumoylating isopeptidase 1-like
EduN_2405	microtubule-actin cross-linking factor isoforms 1 2 3 5-like isoform X5		P:GO:0007050; C:GO:0005856; F:GO:0005509
EduN_2406	PREDICTED: uncharacterized protein LOC105326232 isoform X32
EduN_2407	---NA---
EduN_2408	---NA---
EduN_2409	ataxin-2 isoform X6
EduN_241	60S ribosomal L7a	K02936	F:GO:0003723; P:GO:0000470; C:GO:0022625; P:GO:0006412
EduN_2410	---NA---
EduN_2411	sorbitol dehydrogenase-like	K00008	F:GO:0008270; F:GO:0016491; P:GO:0055114
EduN_2412	---NA---
EduN_2413	notch domain-containing		P:GO:0008152; F:GO:0016787
EduN_2414	solute carrier family 25 member 38		C:GO:0005739; C:GO:0016020; P:GO:0044763; P:GO:0006810
EduN_2415	GTP-binding 1-like		F:GO:0005525; F:GO:0003924
EduN_2416	---NA---
EduN_2417	E3 ubiquitin- ligase UBR2		F:GO:0061630; C:GO:0000151; P:GO:0071596; C:GO:0005737
EduN_2418	Transmembrane 19		C:GO:0016021
EduN_2419	casein kinase II subunit beta	K03115	P:GO:0043537; F:GO:0019904; F:GO:0042802; P:GO:0045859; P:GO:0061154; F:GO:0003682; F:GO:0008134; F:GO:0005102; C:GO:0005886; C:GO:0005956; C:GO:0070062; C:GO:0005737; F:GO:0046872; C:GO:0031519; P:GO:0032927; P:GO:0016055; P:GO:0016310; P:GO:0033211; F:GO:0019887; F:GO:0016301; P:GO:0010862
EduN_242	innexin unc-9-like isoform X2		C:GO:0005921; P:GO:0006811; C:GO:0016021
EduN_2420	---NA---
EduN_2421	---NA---
EduN_2422	probable ATP-dependent RNA helicase DDX46 isoform X2	K12811	F:GO:0003676; F:GO:0016787
EduN_2423	spectrin beta non-erythrocytic 5-like		F:GO:0003779; F:GO:0005543
EduN_2424	malate mitochondrial-like	K00026	P:GO:0005975; F:GO:0030060; P:GO:0006108; P:GO:0006099
EduN_2425	---NA---
EduN_2426	dolichyl-diphosphooligosaccharide-- glycosyltransferase 48 kDa subunit	K12670	F:GO:0016757; P:GO:0006487; C:GO:0005783; C:GO:0044425
EduN_2427	---NA---
EduN_2428	ADP-ribose mitochondrial	K13988	F:GO:0016787
EduN_2429	methyltransferase 9		F:GO:0005515
EduN_243	ATP synthase subunit mitochondrial	K02133	C:GO:0045261; F:GO:0005524; P:GO:0015991; P:GO:0015986; F:GO:0046933
EduN_2430	---NA---
EduN_2431	---NA---
EduN_2432	eukaryotic translation initiation factor 3 subunit D-like	K03251	C:GO:0032991; C:GO:0044444; P:GO:0006412
EduN_2433	---NA---
EduN_2434	---NA---
EduN_2435	PREDICTED: uncharacterized protein LOC105330618 isoform X10
EduN_2436	EF-hand calcium-binding domain-containing 6-like isoform X2		F:GO:0005509; F:GO:0016765
EduN_2437	PREDICTED: uncharacterized protein LOC105318227
EduN_2438	hypothetical protein LOTGIDRAFT_69048, partial		P:GO:0007165
EduN_2439	gastric intrinsic factor-like
EduN_244	Cytadherence high molecular weight 2		F:GO:0008061; P:GO:0006030; C:GO:0016021; C:GO:0005576
EduN_2440	Oral-facial-digital syndrome 1
EduN_2441	CD209 antigen-like	K10062	C:GO:0005581; C:GO:0016020; C:GO:0016021
EduN_2442	---NA---
EduN_2443	---NA---
EduN_2444	coiled-coil domain-containing 146-like
EduN_2445	Cyclic AMP-responsive element-binding 3 2		F:GO:0003700; F:GO:0035497; P:GO:0030968; P:GO:0006355; F:GO:0043565; P:GO:0045944
EduN_2446	kunitz-type precursor protease inhibitor 2		F:GO:0004867; P:GO:0010951
EduN_2447	---NA---
EduN_2448	HIRA isoform X3		P:GO:0043170; P:GO:0031935; C:GO:0000790; C:GO:0070062; F:GO:0005515; F:GO:0003714; F:GO:0031491; P:GO:0042692; P:GO:0001649; C:GO:0043234; P:GO:0006336; P:GO:0007369
EduN_2449	---NA---
EduN_245	RNA-binding 25-like	K12822	F:GO:0000166; P:GO:0008380; F:GO:0005515; C:GO:0005737; P:GO:0000381; C:GO:0016607; P:GO:0006915; C:GO:0005681; F:GO:0003729; P:GO:0042981; P:GO:0006397
EduN_2450	---NA---
EduN_2451	---NA---
EduN_2452	---NA---
EduN_2453	---NA---
EduN_2454	---NA---
EduN_2455	predicted protein		C:GO:0016020; C:GO:0016021
EduN_2456	---NA---
EduN_2457	hypothetical protein CGI_10009674
EduN_2458	---NA---
EduN_2459	---NA---
EduN_246	heat shock cognate 71 [Mytilus galloprovincialis]	K03283	F:GO:0005524
EduN_2460	active breakpoint cluster region-related isoform X5		P:GO:0007165; F:GO:0005085
EduN_2461	---NA---
EduN_2462	dynein heavy chain axonemal-like	K10408	F:GO:0016887; F:GO:0005524; F:GO:0003777; C:GO:0005858; P:GO:0003341
EduN_2463	---NA---
EduN_2464	bromodomain-containing 3 isoform X1		P:GO:0006351; P:GO:0007283; P:GO:0043123; F:GO:0003682; P:GO:0006974; P:GO:0006334; C:GO:0000794; C:GO:0005654; P:GO:0032968; P:GO:1901407; F:GO:0002039; P:GO:0006338; C:GO:0005737; P:GO:0000083; F:GO:0070577; P:GO:0016032; P:GO:0050727; P:GO:2000002; P:GO:0010971
EduN_2465	---NA---
EduN_2466	cholecystokinin receptor-like		F:GO:0004930; P:GO:0007186; P:GO:0007165; C:GO:0016020; C:GO:0016021; F:GO:0004871
EduN_2467	rho-related racA-like		F:GO:0005525; P:GO:0007264; C:GO:0005622
EduN_2468	titin-like isoform X1		C:GO:0016020; C:GO:0016021
EduN_2469	perilipin-2 isoform X3	K17284
EduN_247	---NA---
EduN_2470	Integral membrane 2C		C:GO:0016020
EduN_2471	---NA---
EduN_2472	cilia- and flagella-associated 97-like
EduN_2473	---NA---
EduN_2474	FAM149B1-like isoform X3
EduN_2475	ranBP2-like and GRIP domain-containing 3 isoform X1		F:GO:0008270; F:GO:0046872; P:GO:0046907; F:GO:0016874; C:GO:0005622
EduN_2476	---NA---
EduN_2477	centrosomal of 41 kDa-like isoform X2		C:GO:0044464
EduN_2478	---NA---
EduN_2479	EF-hand calcium-binding domain-containing 5-like isoform X1		P:GO:0007165; F:GO:0005509
EduN_248	T-complex 1 subunit beta-like		C:GO:0005634; C:GO:0005832; F:GO:0005524; C:GO:0070062; F:GO:0051082; P:GO:0006457
EduN_2480	---NA---
EduN_2481	---NA---
EduN_2482	---NA---
EduN_2483	---NA---
EduN_2484	collagen alpha-1(I) chain-like		C:GO:0005581; F:GO:0005201; C:GO:0005578
EduN_2485	---NA---
EduN_2486	hypothetical protein CGI_10018125
EduN_2487	zinc finger ZPR1-like		P:GO:0050794; C:GO:0005737; P:GO:0007275; C:GO:0097458; P:GO:0010628; P:GO:0016043; P:GO:0044763; F:GO:0005488; C:GO:0005654
EduN_2488	Furin-like protease isoforms 1 1-X 2		P:GO:0019538; F:GO:0008233
EduN_2489	---NA---
EduN_249	---NA---
EduN_2490	---NA---
EduN_2491	---NA---
EduN_2492	fantom-like isoform X3		P:GO:0006935; C:GO:0035869
EduN_2493	---NA---
EduN_2494	---NA---
EduN_2495	---NA---
EduN_2496	Collagen alpha-5(VI) chain	K08132	C:GO:0005581
EduN_2497	---NA---
EduN_2498	---NA---
EduN_2499	---NA---
EduN_25	---NA---
EduN_250	suppressor of cytokine signaling 2-like	K04701	C:GO:0005737; P:GO:0019221; F:GO:0004860; P:GO:0006469; P:GO:0046627; P:GO:0046426
EduN_2500	---NA---
EduN_2501	tyramine beta-hydroxylase-like		F:GO:0016715; F:GO:0005507; F:GO:0003824; C:GO:0016020; C:GO:0016021; P:GO:0055114; F:GO:0004497
EduN_2502	IQ domain-containing G		C:GO:0031514; C:GO:0070062; P:GO:0007286
EduN_2503	Carnitine O-palmitoyltransferase liver isoform	K08765	F:GO:0016746; C:GO:0016020; C:GO:0016021; F:GO:0016740
EduN_2504	Apoptosis 1 inhibitor		F:GO:0008270; F:GO:0046872
EduN_2505	PREDICTED: uncharacterized protein LOC105319155 isoform X3		F:GO:0008270; C:GO:0005622
EduN_2506	Conserved
EduN_2507	dihydrolipoyl mitochondrial-like	K00382	C:GO:0005623; F:GO:0050660; P:GO:0045454; P:GO:0055114; F:GO:0004148
EduN_2508	muscleblind 2 isoform X1		F:GO:0046872
EduN_2509	---NA---
EduN_251	---NA---
EduN_2510	---NA---
EduN_2511	---NA---
EduN_2512	---NA---
EduN_2513	cilia- and flagella-associated 44-like		C:GO:0031514
EduN_2514	Zinc finger SWIM domain-containing 6
EduN_2515	---NA---
EduN_2516	---NA---
EduN_2517	PREDICTED: uncharacterized protein C9orf135 homolog
EduN_2518	---NA---
EduN_2519	fibrinogen-related	K06252
EduN_252	tripartite motif-containing protein 45-like isoform X2 [Mizuhopecten yessoensis]		F:GO:0008270; F:GO:0046872; F:GO:0016874; C:GO:0005622
EduN_2520	hypothetical protein CGI_10004062		C:GO:0016020; C:GO:0016021
EduN_2521	---NA---
EduN_2522	---NA---
EduN_2523	hypothetical protein CGI_10007323		P:GO:0007165
EduN_2524	---NA---
EduN_2525	---NA---
EduN_2526	---NA---
EduN_2527	V-type proton ATPase subunit e		C:GO:0033181; P:GO:0015991; C:GO:0033179; F:GO:0046961; C:GO:0005622
EduN_2528	---NA---
EduN_2529	---NA---
EduN_253	mitogen-activated kinase kinase kinase 8	K04429	P:GO:0000226; F:GO:0016301; P:GO:0007049
EduN_2530	---NA---
EduN_2531	---NA---
EduN_2532	collagen alpha-2(IV) chain-like	K06237	C:GO:0005581; F:GO:0005201; C:GO:0005578
EduN_2533	---NA---
EduN_2534	Myosin-2 heavy chain		C:GO:0016020
EduN_2535	---NA---
EduN_2536	metabotropic glutamate receptor 2-like		F:GO:0004930; P:GO:0007186; P:GO:0007165; C:GO:0016020; C:GO:0016021; F:GO:0004871
EduN_2537	C-Maf-inducing -like
EduN_2538	dynein light chain Tctex-type 1
EduN_2539	---NA---
EduN_254	---NA---
EduN_2540	GTPase IMAP family member 4		C:GO:0005737
EduN_2541	---NA---
EduN_2542	lipoxygenase homology domain-containing 1		P:GO:0007605; C:GO:0032420
EduN_2543	dynein heavy chain axonemal-like	K10408	F:GO:0016887; C:GO:0036156; F:GO:0005524; F:GO:0003777; C:GO:0005737; P:GO:0001539; P:GO:0003341; C:GO:0005874
EduN_2544	---NA---
EduN_2545	cytochrome P450 4V2	K17690	C:GO:0005789; P:GO:0001523; F:GO:0005488; F:GO:0004497; P:GO:0010430; P:GO:0016125
EduN_2546	CCR4-NOT transcription complex subunit 10-like	K12607	P:GO:0016070; F:GO:0005515; P:GO:0050794; C:GO:0005737; C:GO:0016020; P:GO:0044763; P:GO:0048519; C:GO:0030014
EduN_2547	monocarboxylate transporter 12-like		P:GO:0055085; C:GO:0016021
EduN_2548	---NA---
EduN_2549	abhydrolase domain-containing 15-like		C:GO:0016020; C:GO:0016021; F:GO:0016787
EduN_255	---NA---
EduN_2550	---NA---
EduN_2551	---NA---
EduN_2552	---NA---
EduN_2553	derlin- partial	K11519	C:GO:0005789; C:GO:0016021
EduN_2554	---NA---
EduN_2555	dynein heavy chain axonemal-like	K10408	F:GO:0016887; F:GO:0005524; F:GO:0003777; C:GO:0030286; P:GO:0007018
EduN_2556	---NA---
EduN_2557	---NA---
EduN_2558	PREDICTED: uncharacterized protein LOC106070898 isoform X1	K14753	C:GO:0016021
EduN_2559	---NA---
EduN_256	---NA---
EduN_2560	52 kDa repressor of the inhibitor of the kinase-like
EduN_2561	---NA---
EduN_2562	---NA---
EduN_2563	signal recognition particle subunit SRP72-like	K03108	P:GO:0006614; F:GO:0008312; F:GO:0005047; C:GO:0005786
EduN_2564	PREDICTED: uncharacterized protein LOC105321058
EduN_2565	---NA---
EduN_2566	26S protease regulatory subunit 10B	K03064	F:GO:0005524; C:GO:0005737; P:GO:0030163; P:GO:0006508; C:GO:0000502; F:GO:0008233
EduN_2567	---NA---
EduN_2568	---NA---
EduN_2569	---NA---
EduN_257	---NA---
EduN_2570	mitogen-activated kinase kinase kinase kinase 4- partial	K08840	F:GO:0005524; F:GO:0004672; P:GO:0006468
EduN_2571	Tripartite motif-containing 3		F:GO:0004842; F:GO:0061630; F:GO:0008270; C:GO:0005737; F:GO:0046872; C:GO:0005622; P:GO:0016567
EduN_2572	Coiled-coil domain-containing 96
EduN_2573	---NA---
EduN_2574	protocadherin Fat 3		C:GO:0016020; P:GO:0007155
EduN_2575	double-stranded RNA-binding Staufen homolog 1- partial
EduN_2576	TANC1-like isoform X1		F:GO:0008270
EduN_2577	Kinesin-like calmodulin-binding		F:GO:0005524; F:GO:0003777; P:GO:0007018; F:GO:0008017
EduN_2578	sperm-associated antigen 17-like isoform X7
EduN_2579	---NA---
EduN_258	60S ribosomal L5	K02932	F:GO:0003735; F:GO:0008097; C:GO:0022625; P:GO:0000027; P:GO:0006412
EduN_2580	---NA---
EduN_2581	---NA---
EduN_2582	---NA---
EduN_2583	fatty acid synthase	K00665	F:GO:0016417; F:GO:0016491; P:GO:0044707; C:GO:0043231; C:GO:0016020; F:GO:0016297; C:GO:0044444; P:GO:0009058; P:GO:0044763; F:GO:0005488; P:GO:0044710; P:GO:0044767
EduN_2584	---NA---
EduN_2585	BTB POZ domain-containing 6-like		C:GO:0016020; C:GO:0016021
EduN_2586	Testis-expressed sequence 36
EduN_2587	radial spoke head 3 homolog
EduN_2588	disulfide-isomerase A6	K09584	F:GO:0003756; P:GO:0043277; C:GO:0005783; P:GO:0045454; P:GO:0006457; P:GO:0034976
EduN_2589	hypothetical protein, partial
EduN_259	chromodomain-helicase-DNA-binding 4-like isoform X2	K11643	F:GO:0003677; F:GO:0005524; P:GO:0007051; F:GO:0008270; P:GO:0051297; C:GO:0016581; F:GO:0008026; P:GO:0006355; P:GO:0006325
EduN_2590	dynein heavy chain axonemal-like		F:GO:0000166
EduN_2591	lingerer-like isoform X3		C:GO:0016020; C:GO:0016021
EduN_2592	very low-density lipo receptor isoform X1		P:GO:0000122; P:GO:0038026; F:GO:0038025; C:GO:0005615; F:GO:0005515; P:GO:0045860; P:GO:0021517; C:GO:0016020; C:GO:0044464; P:GO:0006810; P:GO:1900006; P:GO:0048813
EduN_2593	heterogeneous nuclear ribonucleo U 1 isoform X1	K15047	F:GO:0003723; C:GO:0030529; P:GO:0006351; C:GO:0019013; P:GO:0006355; P:GO:0009615; C:GO:0005654; F:GO:0019899; P:GO:0000398
EduN_2594	phosphatase 1 regulatory subunit 32-like
EduN_2595	---NA---
EduN_2596	---NA---
EduN_2597	---NA---
EduN_2598	---NA---
EduN_2599	PREDICTED: uncharacterized protein LOC102805810		F:GO:0003676
EduN_26	---NA---
EduN_260	---NA---
EduN_2600	Deleted in lung and esophageal cancer 1		P:GO:0008285
EduN_2601	---NA---
EduN_2602	---NA---
EduN_2603	---NA---
EduN_2604	Intraflagellar transport 88 homolog		P:GO:0060122; P:GO:0007290; P:GO:0036334; C:GO:0002081; P:GO:0008544; P:GO:0009952; P:GO:0021513; P:GO:0042733; C:GO:0031514; C:GO:0045177; P:GO:0045494; C:GO:0060091; P:GO:0055007; P:GO:0090102; P:GO:0042462; P:GO:0007224; P:GO:1905515; P:GO:0071482; P:GO:0007219; P:GO:0042073; P:GO:0060914; P:GO:0050680; P:GO:0072019; C:GO:0032391; P:GO:0021537; P:GO:0061351; P:GO:0060021; P:GO:0060426; P:GO:19…
EduN_2605	Ceramide kinase	K04715	P:GO:0016310; F:GO:0016301
EduN_2606	disco-interacting 2 homolog C-like isoform X3		F:GO:0003824; P:GO:0008152
EduN_2607	---NA---
EduN_2608	---NA---
EduN_2609	---NA---
EduN_261	Carboxypeptidase Q		C:GO:0005615; F:GO:0004180; P:GO:0043171; F:GO:0070573; P:GO:0006508
EduN_2610	Eukaryotic translation initiation factor 3 subunit E	K03250	C:GO:0016605; C:GO:0033290; P:GO:0006446; C:GO:0005852; P:GO:0048703; F:GO:0003743; P:GO:0001731; C:GO:0070062; P:GO:0000184; C:GO:0016282; P:GO:0043473; C:GO:0016020; F:GO:0047485; P:GO:0043010
EduN_2611	tissue inhibitor of metalloproteases		P:GO:0010951; F:GO:0008191; C:GO:0005576
EduN_2612	tissue inhibitor of matrix metallo ases 3		P:GO:0010951; C:GO:0005576; F:GO:0008191
EduN_2613	---NA---
EduN_2614	---NA---
EduN_2615	---NA---
EduN_2616	latrophilin Cirl-like isoform X1		P:GO:0016525; F:GO:0004930; F:GO:0004888; P:GO:0007186; P:GO:0007165; C:GO:0016020; C:GO:0016021; F:GO:0005044; P:GO:0007166; F:GO:0030246; F:GO:0004871; P:GO:0006898
EduN_2617	General transcription factor IIF subunit 1	K03138	P:GO:0032968; C:GO:0005634; F:GO:0003677; F:GO:0003824; P:GO:0006367
EduN_2618	---NA---
EduN_2619	PREDICTED: uncharacterized protein LOC105335884		P:GO:0007165
EduN_262	---NA---
EduN_2620	hypothetical protein LOTGIDRAFT_230877		P:GO:0007165
EduN_2621	---NA---
EduN_2622	SFI1 homolog
EduN_2623	golgin subfamily B member 1-like isoform X1
EduN_2624	---NA---
EduN_2625	filamin-C-like isoform X1	K04437	F:GO:0051015
EduN_2626	contactin-associated -like 5 isoform X1		C:GO:0016020; C:GO:0016021
EduN_2627	heterogeneous nuclear ribonucleo M-like isoform X1		F:GO:0000166; F:GO:0003676; C:GO:0030529; C:GO:0019013
EduN_2628	NADH dehydrogenase [ubiquinone] 1 alpha subcomplex subunit mitochondrial	K03953	F:GO:0050662; F:GO:0003824
EduN_2629	Acetyl- acetyltransferase	K00626	F:GO:0016747; P:GO:0008152
EduN_263	elongation factor 2-like	K03234	F:GO:0005525; F:GO:0003746; F:GO:0003924; P:GO:0006414
EduN_2630	---NA---
EduN_2631	---NA---
EduN_2632	cat eye syndrome critical region 5-like
EduN_2633	branchpoint-bridging -like		P:GO:0007050
EduN_2634	---NA---
EduN_2635	---NA---
EduN_2636	large proline-rich BAG6-like isoform X2
EduN_2637	---NA---
EduN_2638	carbonic anhydrase 14-like isoform X3	K01672	F:GO:0008270; C:GO:0016020; F:GO:0004089; P:GO:0006730
EduN_2639	host cell factor C1a isoform X1	K14966	P:GO:0002062; P:GO:0048703
EduN_264	tubulin-alpha partial	K07374	F:GO:0005525; F:GO:0003924; F:GO:0005200; C:GO:0005874; P:GO:0007017
EduN_2640	---NA---
EduN_2641	---NA---
EduN_2642	Retrovirus-related Pol poly from transposon		F:GO:0003677; P:GO:0034220; C:GO:0016021; P:GO:0006310; P:GO:0015074; F:GO:0005230
EduN_2643	---NA---
EduN_2644	caspase 8	K02187	P:GO:0006508; P:GO:0006915; F:GO:0004197
EduN_2645	NADPH oxidase 5		F:GO:0016491; C:GO:0016020; P:GO:0008152
EduN_2646	hydrocephalus-inducing homolog		P:GO:0003341
EduN_2647	---NA---
EduN_2648	---NA---
EduN_2649	collagen chain alpha-		C:GO:0005581; F:GO:0005509; C:GO:0016020; C:GO:0016021; C:GO:0005578
EduN_265	S-adenosylmethionine synthase isoform type-1 isoform X2	K00789	F:GO:0000287; F:GO:0005524; F:GO:0042803; P:GO:0051289; P:GO:0009087; C:GO:0005829; C:GO:0016363; F:GO:0043531; F:GO:0016597; P:GO:0006556; F:GO:0004478; P:GO:0006730
EduN_2650	---NA---
EduN_2651	---NA---
EduN_2652	---NA---
EduN_2653	hypothetical protein LOTGIDRAFT_238849
EduN_2654	---NA---
EduN_2655	---NA---
EduN_2656	---NA---
EduN_2657	immunoglobulin-binding 1		P:GO:0035303
EduN_2658	galactoside 2-alpha-L-fucosyltransferase 2-like isoform X1		P:GO:0005975; F:GO:0016757; P:GO:0036065; C:GO:0016020; C:GO:0016021; F:GO:0016740; F:GO:0008107
EduN_2659	Serine cytosolic	K00600	F:GO:0070905; F:GO:0030170; F:GO:0042803; P:GO:1904482; P:GO:0046655; F:GO:0004372; F:GO:0008168; P:GO:0006231; P:GO:0009113; P:GO:0006565; P:GO:0006544; C:GO:0005634; C:GO:0070062; P:GO:0051262; C:GO:0005739; C:GO:0005829; P:GO:0035999; P:GO:0032259
EduN_266	putative C1q domain containing protein MgC1q11 [Mytilus galloprovincialis]		C:GO:0016020; C:GO:0016021
EduN_2660	Disintegrin and metallo ase domain-containing 10		P:GO:0007229; F:GO:0005509; C:GO:0016020; P:GO:0006508; C:GO:0016021; F:GO:0004222; F:GO:0008237
EduN_2661	cytochrome P450-like TBP		F:GO:0016491; F:GO:0070330; P:GO:0055114
EduN_2662	cilia- and flagella-associated 74-like
EduN_2663	stAR-related lipid transfer 5		F:GO:0032052
EduN_2664	---NA---
EduN_2665	ATP-binding cassette sub-family A member 1-like	K05644	F:GO:0000166; F:GO:0016887; C:GO:0016021; P:GO:0006909; P:GO:0030301; F:GO:0005215
EduN_2666	Fbox domain containing		P:GO:0016310; F:GO:0016301
EduN_2667	---NA---
EduN_2668	6-pyruvoyl tetrahydrobiopterin synthase	K01737	F:GO:0003874; F:GO:0042803; P:GO:0006729; F:GO:0046872; C:GO:0005739
EduN_2669	---NA---
EduN_267	PREDICTED: voltage-dependent T-type calcium channel subunit alpha-1H isoform X9 [Crassostrea gigas]		F:GO:0005262; C:GO:0016020; P:GO:0006816; F:GO:0005244
EduN_2670	ferric-chelate reductase 1		C:GO:0016020
EduN_2671	---NA---
EduN_2672	---NA---
EduN_2673	Serine arginine-rich splicing factor 1A	K12890	F:GO:0000166; F:GO:0003676; P:GO:0043154; C:GO:0071986; P:GO:0019079
EduN_2674	---NA---
EduN_2675	sodium- and chloride-dependent glycine transporter 1-like		P:GO:0006836; F:GO:0005328; P:GO:0055085; C:GO:0016021
EduN_2676	phospholipid scramblase 2-like isoform X1		C:GO:0005623; P:GO:0042592; C:GO:0016020; P:GO:0044763; F:GO:0005488
EduN_2677	bromodomain-containing 8-like isoform X2
EduN_2678	---NA---
EduN_2679	---NA---
EduN_268	---NA---
EduN_2680	---NA---
EduN_2681	caveolin-1-like	K12959	C:GO:0005901; P:GO:0070836; F:GO:0005506; F:GO:0016705; C:GO:0016021; C:GO:0000139; P:GO:0055114; F:GO:0020037
EduN_2682	---NA---
EduN_2683	tctex1 domain-containing 1-like		C:GO:0043229
EduN_2684	filamin-C isoform X1	K04437	F:GO:0051015
EduN_2685	calcium-transporting ATPase sarcoplasmic endoplasmic reticulum type-like isoform X1	K05853	F:GO:0005524; F:GO:0046872; C:GO:0016021; P:GO:0070588; F:GO:0005388; C:GO:0033017
EduN_2686	---NA---
EduN_2687	gelsolin 2		C:GO:0005856; F:GO:0003779; P:GO:0051693; C:GO:0005737
EduN_2688	hypothetical protein CGI_10016269
EduN_2689	stAR-related lipid transfer 3-like isoform X4		C:GO:0016020
EduN_269	60S ribosomal L23a	K02893	F:GO:0000166; F:GO:0003735; P:GO:0051726; C:GO:0005840; P:GO:0006412; P:GO:0031016
EduN_2690	stAR-related lipid transfer 3-like isoform X1		C:GO:0016021; F:GO:0008289
EduN_2691	PREDICTED: uncharacterized protein LOC105339747		F:GO:0070492; C:GO:0016020; C:GO:0016021
EduN_2692	zinc finger CCCH domain-containing 15		F:GO:0004930; F:GO:0005515; P:GO:0007186; C:GO:0005737; F:GO:0046872; F:GO:0035240; P:GO:0019221; C:GO:0016021; F:GO:0072545; F:GO:0072544; C:GO:0005730
EduN_2693	---NA---
EduN_2694	---NA---
EduN_2695	---NA---
EduN_2696	---NA---
EduN_2697	Collectin- partial	K10062	F:GO:0005488
EduN_2698	---NA---
EduN_2699	---NA---
EduN_27	---NA---
EduN_270	interaptin-like [Crassostrea virginica]
EduN_2700	H ACA ribonucleo complex subunit 1-like	K11128	C:GO:0031429; P:GO:0001522; C:GO:0019013; P:GO:0042254
EduN_2701	Crooked neck 1	K12869	C:GO:0071010; C:GO:0071013; C:GO:0071014; C:GO:0071011; C:GO:0071012; C:GO:0000974; P:GO:0000245
EduN_2702	---NA---
EduN_2703	heterochromatin 1-binding 3-like		C:GO:0005694; F:GO:0005488; P:GO:0006325
EduN_2704	---NA---
EduN_2705	splicing factor U2AF 50 kDa subunit-like	K12837	F:GO:0000166; C:GO:0005634; F:GO:0003723; P:GO:0006397
EduN_2706	kinesin KIF28P		F:GO:0005524; F:GO:0003777; C:GO:0016021; P:GO:0007018; C:GO:0005874; F:GO:0008017
EduN_2707	---NA---
EduN_2708	---NA---
EduN_2709	nuclear export mediator factor NEMF-like		C:GO:1990112; C:GO:0010494; P:GO:1990116; P:GO:0002181; C:GO:0005829
EduN_271	PREDICTED: uncharacterized protein LOC105327667
EduN_2710	---NA---
EduN_2711	---NA---
EduN_2712	---NA---
EduN_2713	---NA---
EduN_2714	microtubule-associated futsch-like isoform X17		C:GO:0015630; C:GO:0016020; C:GO:0016021; P:GO:0000226
EduN_2715	Eukaryotic translation initiation factor 3 subunit E	K03250	F:GO:0003743; P:GO:0001731; C:GO:0016282; C:GO:0033290; P:GO:0006446; C:GO:0005852
EduN_2716	---NA---
EduN_2717	---NA---
EduN_2718	---NA---
EduN_2719	---NA---
EduN_272	ETS homologous factor-like		C:GO:0005634; P:GO:0030154; F:GO:0043565; F:GO:0000981; P:GO:0006357
EduN_2720	---NA---
EduN_2721	---NA---
EduN_2722	---NA---
EduN_2723	---NA---
EduN_2724	DNA-binding D-ETS-4		F:GO:0003677; C:GO:0005634; F:GO:0003700; P:GO:0006355; F:GO:0043565
EduN_2725	---NA---
EduN_2726	PREDICTED: putative uncharacterized protein DDB_G0291608 isoform X1
EduN_2727	PREDICTED: uncharacterized protein LOC105322838		C:GO:0005813
EduN_2728	---NA---
EduN_2729	---NA---
EduN_273	microfibril-associated glyco 4-like		P:GO:0034394; P:GO:0007186; F:GO:0033691; F:GO:0004252; C:GO:0005576; P:GO:0043654; P:GO:0002752; F:GO:0001664; F:GO:0008329; P:GO:0046597; P:GO:0001867; C:GO:0031232; P:GO:2000484
EduN_2730	muscle M-line assembly unc-89-like		F:GO:0005524; F:GO:0004672; P:GO:0006468
EduN_2731	---NA---
EduN_2732	uncharacterized protein LOC110460118		C:GO:0016020
EduN_2733	---NA---
EduN_2734	---NA---
EduN_2735	coiled-coil domain-containing 74A-like isoform X1
EduN_2736	IQ domain-containing H-like isoform X2
EduN_2737	---NA---
EduN_2738	---NA---
EduN_2739	opine dehydrogenase-like		F:GO:0050662; P:GO:0055114; F:GO:0047830; F:GO:0050305; F:GO:0047636
EduN_274	Tektin-2		P:GO:0044763
EduN_2740	forkhead box P1-like isoform X3		C:GO:0005634; F:GO:0043565; P:GO:0007420; F:GO:0000981; P:GO:0006357
EduN_2741	transcription elongation regulator 1-like isoform X2	K12824
EduN_2742	transcription elongation regulator 1-like	K12824
EduN_2743	---NA---
EduN_2744	BAG family molecular chaperone regulator 3		F:GO:0005515
EduN_2745	SSUH2 homolog		F:GO:0031072; F:GO:0051082
EduN_2746	---NA---
EduN_2747	Adenylate kinase isoenzyme 5 [Crassostrea gigas]	K00939	F:GO:0016301; P:GO:0044237
EduN_2748	---NA---
EduN_2749	---NA---
EduN_275	DAZ-associated 1-like isoform X2	K14411	F:GO:0097159; F:GO:1901363
EduN_2750	---NA---
EduN_2751	---NA---
EduN_2752	---NA---
EduN_2753	---NA---
EduN_2754	---NA---
EduN_2755	nesprin-1-like		F:GO:0051015; P:GO:0090286; C:GO:0034993
EduN_2756	---NA---
EduN_2757	---NA---
EduN_2758	---NA---
EduN_2759	Coiled-coil domain-containing 96
EduN_276	Fibrinogen C domain-containing 1	K06252
EduN_2760	relaxin receptor 2-like		C:GO:0016020; C:GO:0016021
EduN_2761	Dermatopontin-like		C:GO:0005576
EduN_2762	---NA---
EduN_2763	dynein heavy chain axonemal-like	K10408	F:GO:0016887; F:GO:0005524; F:GO:0003777; C:GO:0030286; P:GO:0007018
EduN_2764	---NA---
EduN_2765	---NA---
EduN_2766	---NA---
EduN_2767	aggrecan x1 core		C:GO:0016020; C:GO:0016021; C:GO:0005576; F:GO:0030246
EduN_2768	PREDICTED: uncharacterized protein LOC107356062
EduN_2769	PREDICTED: uncharacterized protein C2orf50-like isoform X3
EduN_277	PREDICTED: collectin-12 isoform X1 [Callorhinchus milii]	K10062	P:GO:0048518
EduN_2770	transcription factor fos-like 2		F:GO:0003700; F:GO:0043565; P:GO:0006357
EduN_2771	cytosolic phospholipase A2	K16342	F:GO:0004623; C:GO:0005737; F:GO:0046872; P:GO:0008152; P:GO:0009395; P:GO:0016042; P:GO:0006629; F:GO:0004620; F:GO:0016787
EduN_2772	---NA---
EduN_2773	zinc transporter ZIP14-like		P:GO:0055085; C:GO:0016020; C:GO:0016021; F:GO:0046873; P:GO:0030001
EduN_2774	---NA---
EduN_2775	HRAS-like suppressor 2		C:GO:0016020; F:GO:0016740
EduN_2776	10 kDa secreted		C:GO:0016021
EduN_2777	dynein beta ciliary-like	K10408	C:GO:0031514; F:GO:0003777; P:GO:0007018
EduN_2778	monocarboxylate transporter 14-like		P:GO:0055085; C:GO:0016021
EduN_2779	---NA---
EduN_278	---NA---
EduN_2780	Regulator of nonsense transcripts 1		F:GO:0005488
EduN_2781	pro convertase subtilisin kexin type 5-like		F:GO:0005509; C:GO:0016020; C:GO:0016021
EduN_2782	pro convertase subtilisin kexin type 5-like		F:GO:0005509; C:GO:0016020; C:GO:0016021
EduN_2783	---NA---
EduN_2784	proteasome subunit alpha type-4	K02728	P:GO:0000209; P:GO:0038095; P:GO:0090263; C:GO:0000932; P:GO:0038061; F:GO:0004298; P:GO:0043488; P:GO:0006521; C:GO:0005654; P:GO:0002223; P:GO:0090090; P:GO:0000165; P:GO:0002479; P:GO:0033209; C:GO:0070062; F:GO:0005515; C:GO:0019773; P:GO:0016032; P:GO:0031145; C:GO:0005829; P:GO:0060071; P:GO:0051437; P:GO:0050852; P:GO:0051436
EduN_2785	unconventional myosin-Ie-like isoform X1		C:GO:0016459; F:GO:0005524; F:GO:0003779; F:GO:0003774
EduN_2786	NADH dehydrogenase [ubiquinone] iron-sulfur mitochondrial	K03936	F:GO:0008137; P:GO:0055114
EduN_2787	tenascin isoform X12	K06252	P:GO:0048731; C:GO:0031012; P:GO:0044763; P:GO:0050789
EduN_2788	leucine-rich repeat-containing 16A-like isoform X1		P:GO:0051130
EduN_2789	---NA---
EduN_279	---NA---
EduN_2790	Galactoside 2-alpha-L-fucosyltransferase 1		F:GO:0016740
EduN_2791	Sodium- and chloride-dependent glycine transporter 2		P:GO:0006836; P:GO:0036233; P:GO:0060012; F:GO:0005328; P:GO:0055085; F:GO:0015375; C:GO:0016021; C:GO:0005886
EduN_2792	1-phosphatidylinositol 4,5-bisphosphate phosphodiesterase gamma-1-like isoform X3		P:GO:0007165; P:GO:0016042; F:GO:0008081
EduN_2793	---NA---
EduN_2794	---NA---
EduN_2795	protocadherin Fat 1-like isoform X1		P:GO:2000171; C:GO:0030425; P:GO:0001764; P:GO:0000904; C:GO:0016020; P:GO:0010842
EduN_2796	---NA---
EduN_2797	midasin-like isoform X1
EduN_2798	---NA---
[truncated: 18,983 more rows]
