# Supplementary material for: Mantle transcriptome sequencing of Mytilus spp. and identification of putative biomineralization genes
Source: PeerJ. 2019 Jan 14;6:e6245. doi: 10.7717/peerj.6245 (PMC6359903; doi:10.7717/peerj.6245)
Supplement: Supplemental Information 14 [file peerj-07-6245-s014.xlsx]

## Sheet: A
Searching item	Numbers
	EduN	TroV	GalM	Chil	GalT
Total number of examined contigs	8,333	3,667	3,599	2,333	3,050
Total number of identified SSRs	236	76	71	44	56
Number of contigs containing SSR	223	136	94	79	113
Number of contigs containing more than 1 SSR	27	9	12	7	13
Di-nucleotide	115	38	20	12	32
Tri-nucleotide	85	24	18	17	18
Tretra-nucleotide	28	12	7	12	6
Penta-nucletoide	6	2	0	1	0
Hexa-nucleotide	2	0	2	2	0

## Sheet: B
Group	Motif	Motif Length	Total Counts
Chil	ACAA	4	1
	AGAA	4	1
	AGGATC	6	1
	ATCA	4	1
	ATT	3	1
	CCA	3	1
	CCAGCT	6	1
	CCG	3	1
	CCGC	4	1
	CGT	3	1
	GTG	3	1
	GTTT	4	1
	TC	2	1
	TCA	3	1
	TCC	3	1
	TG	2	1
	TGGT	4	1
	TTCCG	5	1
	CTT	3	2
	GAT	3	2
	GCT	3	2
	ATTG	4	3
	ATTT	4	3
	GCA	3	4
	AT	2	10
GalT	ACG	3	1
	ACTT	4	1
	AG	2	1
	ATAA	4	1
	ATTT	4	1
	CAA	3	1
	CAAA	4	1
	CAT	3	1
	CGTC	4	1
	GATA	4	1
	GTC	3	1
	TC	2	1
	TCT	3	1
	AC	2	2
	ATT	3	2
	CTG	3	2
	GGA	3	2
	ATG	3	3
	GT	2	3
	GGT	3	4
	AT	2	25
GalM	AC	2	1
	ACC	3	1
	ACT	3	1
	AGGATC	6	1
	ATAA	4	1
	ATGC	4	1
	ATTT	4	1
	CAA	3	1
	CAAT	4	1
	GA	2	1
	GGAGCT	6	1
	GTCC	4	1
	AAAC	4	2
	ATC	3	2
	CCG	3	2
	GGA	3	2
	GGT	3	2
	GT	2	2
	GTT	3	2
	CT	2	3
	CTG	3	3
	CTT	3	3
	ATG	3	4
	CCT	3	4
	CGT	3	4
	ATT	3	5
	AGC	3	6
	AT	2	13
TroV	AAAC	4	3
	AATT	4	1
	AC	2	1
	ACA	3	1
	AG	2	3
	AGA	3	2
	AT	2	30
	ATAA	4	2
	ATAAG	5	1
	ATC	3	4
	ATG	3	5
	ATT	3	1
	CAAT	4	1
	CGT	3	3
	CTG	3	2
	GATT	4	2
	GCA	3	1
	GT	2	3
	GTCC	4	1
	GTT	3	3
	GTTT	4	1
	TATT	4	1
	TC	2	1
	TGG	3	2
	TTGTC	5	1
EduN	AAAC	4	3
	AAC	3	9
	AACATA	6	1
	AAG	3	7
	AC	2	10
	ACC	3	8
	ACG	3	3
	ACTT	4	1
	AG	2	6
	AGG	3	6
	AGGGTT	6	1
	AT	2	83
	ATA	3	2
	ATAA	4	3
	ATAAG	5	1
	ATAG	4	1
	ATC	3	12
	ATCA	4	2
	ATG	3	6
	ATT	3	2
	ATTG	4	6
	CAAC	4	1
	CAG	3	2
	CCG	3	1
	CGGAA	5	1
	CGT	3	7
	CT	2	8
	CTATT	5	1
	CTC	3	5
	CTT	3	3
	GAAA	4	1
	GC	2	1
	GCGA	4	1
	GGT	3	5
	GT	2	7
	GTCC	4	1
	GTT	3	7
	GTTG	4	4
	GTTT	4	1
	TACC	4	1
	TTACT	5	2
	TTGAA	5	1
	TTTA	4	2
