# Supplementary material for: Mantle transcriptome sequencing of Mytilus spp. and identification of putative biomineralization genes
Source: PeerJ. 2019 Jan 14;6:e6245. doi: 10.7717/peerj.6245 (PMC6359903; doi:10.7717/peerj.6245)
Supplement: Supplemental Information 15 [file peerj-07-6245-s015.xlsx]

## Sheet: Arkusz1
Contig	Description	E-value	Identity	Domain
Chil_1007	Collagen alpha-2(I) chain	2.66004e-12	73.6%	Collagen triple helix repeat/
Chil_103	ACTB isoform	3.53527e-36	100%	Actin family/
Chil_1045	pedal retractor muscle myosin heavy	2.62549e-106	93.9%	Myosin head, motor domain/
Chil_1053	sestrin-1-like isoform X3	2.52844e-27	66.6%	Sestrin/
Chil_1055	twitchin -1	4.64377e-152	73.2%	Fibronectin type III/
Chil_1099	Laminin subunit beta-1	1.84735e-12	71.9%
Chil_11	collagen - partial	1.96466e-74	59.5%	von Willebrand factor, type A/
Chil_1117	von Willebrand factor A domain-containing 3B	2.30816e-06	69.9%
Chil_1128	thrombospondin type-1 domain-containing 7B isoform X1	5.04339e-37	66.2%
Chil_1133	sarcoplasmic calcium-binding	2.94963e-09	57.5%
Chil_1143	glutathione peroxidase	5.8e-16	0.797
Chil_1148	low-density lipo receptor-related 4-like	2.35052e-18	53.9%	Sushi/SCR
Chil_1152	filamin-A isoform X15	6.4601e-124	90%	Filamin/ABP280 repeat
Chil_1171	katanin p60 ATPase-containing subunit A1-like isoform X1	1.03033e-16	66.1%
Chil_1180	Casein kinase II subunit beta	2.35945e-105	96.4%	Casein kinase II, regulatory subunit/
Chil_1205	PSM_MYTCA ame: Full=Shell matrix	3.27462e-104	62.9%
Chil_1211	collagen alpha-1(XI) chain isoform X1	3.12078e-10	72.5%	Collagen triple helix repeat/
Chil_1216	filamin-A-like isoform X5	1.09942e-40	74.5%
Chil_1227	mucin-16-like [Crassostrea virginica]	2e-45	0.43	Thrombospondin type-1 (TSP1) repeat/
Chil_123	neurexin-3-like isoform X5	2.74359e-24	61.3%	Neurexin/syndecan
Chil_1233	myostatin [Mytilus chilensis]	8e-79	1	Cystine-knot cytokine/
Chil_126	EP precursor	4.99093e-78	86.8%	C1q domain/
Chil_1269	fructose-bisphosphate aldolase	1.27723e-41	85.7%
Chil_1271	V-type proton ATPase subunit G	6e-18	0.7435
Chil_1283	titin-like isoform X1	5.7658e-37	74.8%	Fibronectin type III/
Chil_1300	follistatin-related 5	1.2277e-38	74.2%	Immunoglobulin-like domain/
Chil_1306	PREDICTED: mucin-17 isoform X10 [Crassostrea gigas]	2e-36	0.51	Trypsin Inhibitor-like, cysteine rich domain/
Chil_1376	heat shock 70 kDa 12A-like	6.31429e-67	80.1%
Chil_1392	RS-rich -1	2e-31	0.74
Chil_1394	filamin-C isoform X1	1.64063e-31	64%
Chil_1416	protein amalgam-like [Mizuhopecten yessoensis]	2e-36	0.5	Immunoglobulin subtype/
Chil_143	calponin -1	1.07099e-179	85.2%	Calponin repeat/
Chil_1437	Heat shock 70 kDa	3.32326e-62	99.5%
Chil_144	calponin -2	5.5153e-76	69.7%	Calponin repeat/
Chil_1447	heat shock 90	3.79319e-48	95.4%	Heat shock protein Hsp90, conserved site/
Chil_1456	70 kDa neurofilament	1.74497e-48	64.6%	Intermediate filament protein, conserved site/
Chil_1462	Tenascin-X	1.6498e-26	63.38%
Chil_1478	Synaptopodin 2	9.62267e-63	82.7%
Chil_1480	collagen alpha-2(IV) chain-like	3.90791e-74	74.7%	Collagen IV, non-collagenous/
Chil_1484	calreticulin	5.8e-42	0.7585
Chil_1489	filamin -	2.52397e-84	83.1%	Filamin/ABP280 repeat
Chil_1493	low-density lipo receptor-related 6-like	2.18601e-41	72.2%	Low-density lipoprotein (LDL) receptor class A repeat/
Chil_1504	byssal peroxidase 1	1.16595e-53	58%	Haem peroxidase/
Chil_1517	filamin -1	4.87757e-135	93.6%	Filamin/ABP280 repeat
Chil_1518	universal stress PHOS34-like	1.02595e-21	69.7%	Rossmann-like alpha/beta
Chil_1562	lysozyme	1e-83	0.7335	Invertebrate-type lysozyme/
Chil_157	fibril-forming collagen alpha chain-like	2.05624e-18	71.7%
Chil_1574	stromelysin-1-like [Crassostrea virginica]	3e-15	0.39
Chil_1576	nucleoside diphosphate kinase homolog 5	6.1e-42	0.7935	Nucleoside diphosphate kinase/
Chil_1584	matrix metalloproteinase-2-like	9.36211e-26	79.3%	Metallopeptidase, catalytic domain/
Chil_1656	myophilin	3.73443e-14	67.5%	Calponin homology domain/
Chil_167	PDZ domain-containing -1	3.73843e-17	67.5%
Chil_1692	heat shock 70 kDa 12A-like	7.54199e-90	81.4%
Chil_1705	KS-rich protein	5e-54	0.77
Chil_1717	Collagen alpha-1(IV)	9.54726e-14	61.3%	Collagen triple helix repeat/
Chil_1759	Transforming growth factor beta regulator 1	5.30897e-34	60.9%
Chil_1761	heat shock 70 kDa 12A-like	5.70265e-18	64.4%
Chil_1790	nacrein	5.35105e-60	67.3%	Alpha carbonic anhydrase/
Chil_1818	heat shock cognate	2.92001e-48	95%	Heat shock protein 70 family/
Chil_1827	Laminin subunit alpha	6.64878e-57	62.8%	Laminin EGF domain/
Chil_187	collagen alpha-1(I) chain-like	2.72638e-40	61%	Collagen triple helix repeat/
Chil_188	probable chitinase 3	9e-88	76.2%	Chitinase II/
Chil_1886	V-type H(+)-translocating pyrophosphatase	5e-25	0.67
Chil_1907	mucin-16 isoform X1	1.31866e-13	61%	von Willebrand factor, type D domain/
Chil_1914	collagen - partial	7.43017e-07	72.6%
Chil_1915	ankyrin-2-like isoform X30	2.57172e-15	77.3%
Chil_1941	twitchin -1	1.13626e-52	84%	Fibronectin type III/
Chil_1948	neural cell adhesion molecule 1-	2.41269e-14	61.6%	Immunoglobulin-like domain/
Chil_195	disulfide-isomerase	8.12558e-170	79.7%	Disulphide isomerase/
Chil_1974	sushi-like protein [Mytilus coruscus]	1e-09	0.47
Chil_199	small heat shock protein 24.1 [Mytilus galloprovincialis]	7.71636e-65	60.2%	Alpha crystallin/Hsp20 domain
Chil_1991	von Willebrand factor type EGF and pentraxin domain-containing 1-like	5.08465e-18	55.4%	Growth factor receptor cysteine-rich domain/
Chil_2019	TPM_MYTGA ame: Full=Tropomyosin	1.68437e-25	97.7%	Tropomyosin/
Chil_204	nacre apextrin 1	2.14824e-132	76.7%	Apextrin, C-terminal domain/
Chil_2045	calmodulin 3b (phosphorylase delta)	1.28025e-44	94.8%
Chil_206	PREDICTED: protein PIF-like	9e-10	0.32
Chil_211	TUBB4A isoform	6.91055e-75	99.7%	Beta tubulin/
Chil_212	tubulin beta chain	0	99%	Beta tubulin/
Chil_214	actin, alpha skeletal muscle	2.85596e-87	97.4%	Actin family/
Chil_215	actin, alpha skeletal muscle	1.02838e-63	96.4%
Chil_217	mucin-16-like [Crassostrea virginica]	5e-13	0.35
Chil_22	lysozyme	4.2e-72	0.6495	Invertebrate-type lysozyme/
Chil_222	cold shock domain-containing E1-like	1.68983e-96	68.2%	Cold shock domain/
Chil_25	shell protein-3 [Mytilus coruscus]	2e-89	0.92
Chil_251	cathepsin B	7.70547e-145	82.9%	Cysteine peptidase, asparagine active site/
Chil_257	cold shock domain-containing E1-like	1.89732e-164	79.5%	Cold shock domain/
Chil_26	peptidyl-prolyl cis-trans isomerase B-like	1e-114	0.727	Cyclophilin-like domain/
Chil_260	mucin-16-like [Crassostrea virginica]	3e-33	0.43	Trypsin Inhibitor-like, cysteine rich domain/
Chil_275	copper zinc superoxide dismutase	4.58912e-09	78%
Chil_291	beta actin	1.80718e-62	100%	Actin/actin-like conserved site
Chil_292	actin isoform	8.71161e-66	100%	Actin family/
Chil_293	actin, cytoplasmic 5	2.38419e-58	91%
Chil_294	actin, partial	1.03501e-37	95%	Actin family/
Chil_296	chitinase -	4.07738e-154	71.9%	Chitinase II/
Chil_298	tubulin beta chain	1.72279e-38	100%
Chil_302	mucin-17 isoform X10	9e-30	0.46	Thrombospondin type-1 (TSP1) repeat/
Chil_303	tubulin beta	1.94494e-42	100%	Beta tubulin/
Chil_304	tubulin beta	3.79119e-54	100%	Tubulin/FtsZ, C-terminal
Chil_308	heat shock 70	0	94.6%	Heat shock protein 70 family/
Chil_32	actin, cytoplasmic 2	9.51517e-99	99.3%	Actin family/
Chil_324	fibril-forming collagen alpha chain-like	5.96514e-51	56.2%
Chil_328	Collagen alpha-5(VI) chain	0	64.3%	von Willebrand factor, type A/
Chil_33	Actin, partial	7.26378e-100	99.5%	Actin family/
Chil_34	actin, alpha skeletal muscle	6.16377e-95	99.4%	Actin family/
Chil_340	mytilin B antimicrobial peptide precursor	9.74369e-50	86.9%	Myticin preproprotein/
Chil_342	heat shock	2.96118e-60	97%	Heat shock protein 70 family/
Chil_35	actin, cytoplasmic 3	1.70971e-94	99.5%	Actin family/
Chil_357	Calmodulin	6.22382e-60	95.4%
Chil_36	ACTC_BIOAL ame: Full= cytoplasmic Contains: ame: Full= intermediate form Flags: Precursor	0	98.6%	Actin/actin-like conserved site
Chil_372	parathyroid hormone parathyroid hormone-related peptide receptor-like	8.02812e-47	72.6%	GPCR, family 2, secretin-like/
Chil_388	twitchin isoform X2	1.23309e-82	69.2%	Fibronectin type III/
Chil_405	voltage-dependent anion-selective channel 2	1.08963e-128	83.6%	Eukaryotic porin/Tom40
Chil_419	beta-tubulin type 1 isoform	2.19887e-47	94.6%
Chil_421	actin, partial	5.30253e-31	81.3%
Chil_422	actin type	2.42064e-49	98%	Actin family/
Chil_429	transgelin -3	2.6592e-56	91.7%	Calponin homology domain/
Chil_439	Telomerase component 1	8.58661e-16	73.5%
Chil_44	n superoxide dismutase	1.78109e-97	60.2%	Superoxide dismutase, copper/zinc binding domain
Chil_446	LKD-rich protein-1	5.38752e-37	76.1%
Chil_451	matrix metalloproteinase-14-like	1.32639e-37	68.8%	Hemopexin, conserved site/
Chil_455	Collagen alpha-1(IV) chain	5.02678e-28	55.1%	Collagen triple helix repeat/
Chil_48	ferritin 2	1.96152e-117	93.7%	Ferritin/DPS protein domain
Chil_489	secreted protein	2.64589e-11	68.6%
Chil_500	nucleoside diphosphate kinase	2.9e-92	0.8205	Nucleoside diphosphate kinase/
Chil_512	beta actin	5.72307e-25	100%
Chil_519	exoskeleton RP43 isoform X5	5.21751e-17	69.9%
Chil_520	Synaptotagmin 5	1.4164e-54	75.2%	Rab-binding domain/
Chil_536	Calmodulin	3.78173e-64	100%	EF-Hand 1, calcium-binding site/
Chil_556	heat shock 70	7.22628e-62	94.6%
Chil_557	heat shock 70	1.52172e-78	86.5%	Heat shock protein 70 family/
Chil_575	vascular endothelial growth factor C-like isoform X1	1.95343e-35	58.3%
Chil_577	Transforming growth factor-beta-induced ig-h3	1.33155e-61	60.9%	FAS1 domain/
Chil_58	shell myostracum collagen	6.39005e-35	75%	von Willebrand factor, type A/
Chil_584	RS-rich -2	3.36495e-15	78%
Chil_59	shell myostracum collagen	6.46197e-36	71.3%	von Willebrand factor, type A/
Chil_592	HIP_MYTED ame: Full=Heavy metal-binding HIP	1.74771e-51	84.4%	C1q domain/
Chil_594	Arginine kinase	0	81.4%	phosphagen_kinase_superfamily
Chil_610	retrograde of 51 kDa-like isoform X4	2.44027e-19	70.6%
Chil_617	cathepsin D	3.97628e-19	69%	Aspartic peptidase domain/
Chil_62	SCO-spondin	6e-33	0.38	Cystine knot, C-terminal/
Chil_642	mucin-16 isoform X7	7e-55	0.48	Uncharacterised domain, cysteine-rich/
Chil_643	Peptidyl-prolyl cis-trans isomerase	8.1e-84	0.875	Cyclophilin-like domain/
Chil_65	MYSP_MYTGA ame: Full=Paramyosin	0	89.3%	Myosin tail/
Chil_656	collagen alpha-1(I) chain-like	3.60078e-19	62.2%	Collagen triple helix repeat/
Chil_660	SCO-spondin partial	7e-27	0.31	Cystine knot, C-terminal/
Chil_661	peroxidasin partial	5.7e-28	0.5815	Immunoglobulin/
Chil_678	V-type proton ATPase subunit S1-like	6.2e-15	0.555
Chil_723	RS-rich -2	1.55066e-98	80.9%
Chil_73	actin, cytoplasmic 4	3.03188e-154	99%	Actin/actin-like conserved site
Chil_74	actin, adductor muscle	2.53798e-77	96%	Actin family/
Chil_745	SAP DNA-binding domain-containing [Heterostelium album PN500]	6.43004e-13	66.1%	Actin family/
Chil_754	twitchin -1	9.9151e-63	71.5%
Chil_756	retrograde of 51 kDa-like isoform X4	9.33158e-76	61.8%	Intermediate filament protein/
Chil_76	heat shock 90	0	94.9%	Heat shock protein Hsp90 family/
Chil_768	C1q domain containing 1q23	6.09067e-66	67.4%	C1q domain/
Chil_780	apextrin-like protein	1.18663e-76	63.1%	Apextrin, C-terminal domain/
Chil_782	PROF_HELCR ame: Full=Profilin	5.62582e-62	78%	Profilin/
Chil_786	metalloproteinase inhibitor 3	6.02376e-58	45.5%	Protease inhibitor I35 (TIMP)/
Chil_804	collagen -	2.21716e-86	74.4%	von Willebrand factor, type A/
Chil_812	Fe-S oxidoreductase	1.06629e-20	68.9%
Chil_848	PLEC isoform	3.05632e-39	88.8%	Calponin homology domain/
Chil_86	tubulin beta	1.1286e-44	95.2%	Tubulin/FtsZ, C-terminal
Chil_87	tubulin beta-8 chain-like	3.27569e-43	91.5%	Beta tubulin/
Chil_90	GTP pyrophosphokinase	2.52051e-48	84.1%	C1q domain/
Chil_91	TPM_MYTED ame: Full=Tropomyosin	8.80393e-07	72.5%
Chil_92	TPM_MYTGA ame: Full=Tropomyosin	4.78285e-19	97.1%
Chil_929	phosphoenolpyruvate carboxykinase [GTP]-like [Crassostrea gigas]	2e-98	0.8
Chil_930	heat shock 70 kDa cognate	1.31362e-52	93.1%
Chil_958	PREDICTED: glyceraldehyde-3-phosphate dehydrogenase, cytosolic [Erythranthe guttata]	1e-84	0.82	glyceraldehyde-3-phosphate dehydrogenase, NAD binding
Chil_965	collagen alpha-6(IV) chain isoform X4	1.4565e-06	48.2%
Chil_984	EH domain-containing 2	3.86083e-77	96.3%
Chil_987	mucin 16	1e-33	0.42	EGF-like, conserved site/
EduN_1001	ankyrin-2-like isoform X7	5.082e-55	67.4%
EduN_1004	collagen alpha-1(XII) chain-like isoform X1	1.14131e-88	57.9%	von Willebrand factor, type A/
EduN_1013	Peptidyl-prolyl cis-trans isomerase	6.48051e-84	88.4146341463414%	Cyclophilin-like domain/
EduN_1026	Tyrosine- phosphatase Lar-like	1.36111e-26	69.4214876033057%
EduN_1071	actin 2	2.04652e-22	79.5%	Actin family/
EduN_109	EF-hand domain-containing 1	7e-114	0.75	Domain of unknown function DUF1126/
EduN_1099	byssal tyrosinase -1 precursor	3e-31	0.79
EduN_11	PREDICTED: tubulin beta chain [Merops nubicus]	5e-84	0.98	Beta tubulin/
EduN_1103	calponin -1	3.07263e-11	73.8%
EduN_1120	galectin 2	2.5229e-87	81.4%	Concanavalin A-like lectin/glucanase domain
EduN_1139	von Willebrand factor type EGF and pentraxin domain-containing 1-like	2.35315e-92	63.5%
EduN_1140	matrix metalloproteinase-14-like	1.95653e-08	60.5%	Metallopeptidase, catalytic domain/
EduN_1142	PREDICTED: sushi, von Willebrand factor type A, EGF and pentraxin domain-containing protein 1-like, partial [Crassostrea gigas]	5e-12	0.6	Sushi/SCR
EduN_12	beta-tubulin [Pinctada fucata]	2e-90	0.97	Beta tubulin/
EduN_120	sushi, von Willebrand factor type A, EGF and pentraxin domain-containing protein 1-like [Crassostrea virginica]	2e-26	0.33	EGF-like, conserved site/
EduN_122	PREDICTED: filamin-A isoform X14 [Crassostrea gigas]	0	0.7	Filamin/ABP280 repeat
EduN_1223	low-density lipo receptor-related 6	2.81838e-07	55.6%	Sushi/SCR
EduN_123	PREDICTED: mucin-17 isoform X10 [Crassostrea gigas]	2e-118	0.4	Thrombospondin type-1 (TSP1) repeat/
EduN_1249	microfibril-associated glyco 4-like	6.41513e-08	58%
EduN_1257	cathepsin L1-like isoform X1	2.95842e-105	81.9%	Cysteine peptidase, asparagine active site/
EduN_131	mucin-16-like [Crassostrea virginica]	0	0.43	Trypsin Inhibitor-like, cysteine rich domain/
EduN_1317	cartilage matrix -like isoform X2	4.29747e-12	54%
EduN_132	cAMP response element binding protein 2 [Pteria penguin]	8e-07	0.48	Basic-leucine zipper domain/
EduN_133	HSP90 [Mytilus coruscus]	0	0.99	Heat shock protein Hsp90 family/
EduN_1336	retrograde of 51 kDa-like isoform X3	3.10316e-121	75%	Intermediate filament protein/
EduN_1338	cathepsin L	1.66419e-84	73%	Cysteine peptidase, asparagine active site/
EduN_1341	beta actin	1.71823e-25	100%	Actin family/
EduN_1344	mothers against decapentaplegic homolog 5-like	4.54531e-49	97.1830985915493%
EduN_136	annexin A7-like isoform X1	2e-142	0.64	Annexin/
EduN_1373	heat shock 70 kDa 12A-like	8.03916e-49	56.5%
EduN_1392	collagen alpha-2(IV) chain-like	1.47756e-22	62.9%	Collagen triple helix repeat/
EduN_1398	Select seq OPL32784.1	1e-10	0.41	C-type lectin fold/
EduN_1421	cleavage and polyadenylation specificity factor subunit 6-like	1.86079e-42	91.2%
EduN_1423	heat shock 70 kDa 12A-like	5.8487e-40	86.5%
EduN_1431	fibropellin-1-like isoform X8	5.47941e-74	74.5%	von Willebrand factor, type A/
EduN_1436	collagen alpha-1(I) chain-like	1.73037e-24	62.2%	Collagen triple helix repeat/
EduN_1441	CD109 antigen-like [Mizuhopecten yessoensis]	2e-102	0.7	Alpha-macroglobulin complement component/
EduN_1455	metallothionein MT-10	1.75706e-17	95.8904109589041%	Metallothionein/
EduN_148	PREDICTED: calmodulin-A isoform X2 [Sinocyclocheilus anshuiensis]	1e-55	0.9	EF-Hand 1, calcium-binding site/
EduN_1492	heat shock 70 kDa 12A-like	3.34568e-69	70.1%
EduN_1519	Cartilage matrix	6.39271e-50	67.8%	von Willebrand factor, type A/
EduN_1535	leucine-rich repeat-containing 23-like isoform X1	3.86699e-98	87.1%	Leucine-rich repeat domain, L domain-like/
EduN_1547	A disintegrin and Metalloproteinase with thrombospondin motifs 1	3e-91	0.52	Metallopeptidase, catalytic domain/
EduN_1562	tubulin beta-4B chain-like	1.21797e-48	99.6%	Beta tubulin, autoregulation binding site/
EduN_1611	serine threonine- phosphatase 6 regulatory ankyrin repeat subunit A-	2.0908e-29	65.4%	Ankyrin repeat/
EduN_1618	heat shock cognate 71 kDa -like	1.3162e-104	96.7%	Heat shock protein 70 family/
EduN_1619	heat shock cognate 71 kDa -like	1.3162e-104	96.7%	Heat shock protein 70 family/
EduN_1633	heat shock 70 kDa 12A-like	0	72%	Heat shock protein 70 family/
EduN_166	cathepsin B-like [Crassostrea virginica]	5e-124	0.63	Cysteine peptidase, cysteine active site/
EduN_1670	neuronal acetylcholine receptor subunit alpha-6	2.77745e-27	61.9%	Neurotransmitter-gated ion-channel ligand-binding domain/
EduN_1676	galactose-specific lectin nattectin-like	6.4645e-21	57.4%	C-type lectin fold/
EduN_1678	Collagen alpha-4(VI) chain	1.65418e-28	63.4%	von Willebrand factor, type A/
EduN_169	Tubulin beta-4B chain [Phoenicopterus ruber ruber]	2e-159	1	Beta tubulin/
EduN_1710	frizzled receptor	1.47008e-09	50%
EduN_1730	E3 ubiquitin- ligase TRIM33	3.48898e-49	62%	B30.2/SPRY domain
EduN_1765	collagen alpha-2(IV) chain-like	7.49017e-09	61.5%
EduN_1778	collagen - partial	4.02707e-49	60.4%	von Willebrand factor, type A/
EduN_1785	receptor-type tyrosine- phosphatase alpha-like	8.87715e-72	67.6%	Protein-tyrosine phosphatase-like/
EduN_1788	Calmodulin	7.18693e-50	78.2%	EF-Hand 1, calcium-binding site/
EduN_1801	Transforming growth factor beta regulator 1	2.66475e-31	66.9%
EduN_1825	EF-hand domain-containing 1	3.79643e-65	90.9%	Domain of unknown function DUF1126/
EduN_1826	EF-hand domain-containing 1	4.03162e-44	72.4%	Domain of unknown function DUF1126/
EduN_1827	EF-hand domain-containing 1	6.21063e-56	80%	Domain of unknown function DUF1126/
EduN_1850	small heat shock protein 24.1 [Mytilus galloprovincialis]	3e-76	0.81	Alpha crystallin/Hsp20 domain
EduN_188	laminin subunit alpha-2-like isoform X2 [Mizuhopecten yessoensis]	3e-24	0.55	Laminin EGF domain/
EduN_1890	stress-70 mitochondrial-like	3.02683e-48	85.1%	Heat shock protein 70 family/
EduN_191	Carbohydrate sulfotransferase 15 [Mizuhopecten yessoensis]	2e-35	0.47	P-loop containing nucleoside triphosphate hydrolase/
EduN_1915	Inversin [Crassostrea gigas]	6e-69	0.55
EduN_192	sodium/potassium-transporting ATPase subunit alpha-like [Crassostrea virginica]	0	0.84	Cation-transporting P-type ATPase, C-terminal/
EduN_1925	retrograde of 51 kDa-like isoform X2	3.34414e-18	66.4%
EduN_1953	tripartite motif-containing 45-like	2.10186e-88	55.2%
EduN_1962	galaxin-like isoform X1	1.02253e-55	42.6%
EduN_197	PREDICTED: zonadhesin-like [Crassostrea gigas]	1e-102	0.34	Kringle/
EduN_1978	putative C1q domain containing protein MgC1q32 [Mytilus galloprovincialis]	2e-38	0.9
EduN_1982	carbonic anhydrase 14-like isoform X3	5.0758e-44	69.3%	Alpha carbonic anhydrase/
EduN_1997	voltage-dependent calcium channel gamma-2 subunit-like	7.42644e-17	62.0689655172413%
EduN_1999	gelsolin 2	2.18929e-134	75.4%	ADF-H/Gelsolin-like domain
EduN_2	beta-tubulin [Pinctada fucata]	4e-96	0.99	Beta tubulin/
EduN_2002	copper zinc superoxide dismutase	2.30846e-26	65.6%
EduN_2010	peroxidasin partial	6.73237e-26	55.6016597510373%
EduN_2014	von Willebrand factor A domain-containing 5A-like	1.46098e-81	68.8%
EduN_2024	Fructose-bisphosphate aldolase	2.22379e-41	84.9%
EduN_205	Beta-hexosaminidase [Crassostrea gigas]	3e-38	0.43	Carbohydrate-binding domain/
EduN_206	Alpha-actinin, sarcomeric [Crassostrea gigas]	0	0.78	Spectrin/alpha-actinin
EduN_2061	PREDICTED: sperm motility kinase [Crassostrea gigas]	4e-25	0.69
EduN_2068	Acidic mammalian chitinase	1e-52	66.1%	Chitinase insertion domain/
EduN_2073	fibrillin-2-like isoform X1	1.76181e-37	66.8711656441717%
EduN_2079	egg surface -1	3e-86	0.74	Neurotransmitter-gated ion-channel ligand-binding domain/
EduN_2095	heat shock 70 kDa 12A-like	8.89463e-31	66%	Heat shock protein 70kD, peptide-binding domain/
EduN_212	putative tubulin beta 2 [Taeniopygia guttata]	1e-93	0.99	Beta tubulin/
EduN_2121	glutathione peroxidase 3	1.84857e-56	79.6747967479674%	Glutathione peroxidase/
EduN_2135	EF-hand calcium-binding domain-containing 5-like isoform X1	1.19192e-174	78.3%	GAF domain-like/
EduN_2141	copper zinc superoxide dismutase	2.08632e-31	63.8%	Reverse transcriptase domain/
EduN_2149	hemicentin-1-like isoform X1	6e-09	0.54
EduN_2161	fibrillin-2-like isoform X2	1.20689e-35	55.7971014492753%
EduN_2170	heat shock 70 kDa 12A-like	1.48284e-29	52.9%	Heat shock protein 70 family/
EduN_2177	Collagen alpha-1(IX) chain	2.99666e-09	76.6%	Collagen triple helix repeat/
EduN_2180	TQXA domain-containing	2.15181e-13	48.5%	Collagen triple helix repeat/
EduN_2193	E3 ubiquitin- ligase Midline-1-like	1.12005e-21	57.6%
EduN_2226	perlucin isoform X3	5.97326e-37	68.1%	C-type lectin fold/
EduN_2229	Peptidyl-prolyl cis-trans isomerase E	6.83542e-65	87.5%	Peptidyl-prolyl cis-trans isomerase E, RNA recognition motif/
EduN_2237	Chitin synthase 1	5.14687e-39	55.6%
EduN_2244	putative C1q domain containing protein MgC1q91 [Mytilus galloprovincialis]	3e-25	0.43	C1q domain/
EduN_2282	hillarin-like [Crassostrea virginica]	5e-136	0.77	Galactose-binding domain-like/
EduN_229	fibril-forming collagen alpha chain-like [Crassostrea virginica]	9e-69	0.53	Collagen triple helix repeat/
EduN_2298	calmodulin	1.87271e-64	75%	EF-Hand 1, calcium-binding site/
EduN_23	nacre protein [Pinctada fucata]	2e-07	0.4
EduN_2320	lectin subunit alpha-like isoform X1	8.78677e-16	57%
EduN_2331	egg surface -1	2.18495e-119	54.5%	Immunoglobulin-like domain/
EduN_2351	PREDICTED: neuronal acetylcholine receptor subunit alpha-4-like [Saccoglossus kowalevskii]	2e-12	0.39	Neurotransmitter-gated ion-channel ligand-binding domain/
EduN_2355	cathepsin L1-like	1.49501e-37	72.3%
EduN_2361	von Willebrand factor A domain-containing 3B	2e-16	0.55
EduN_2371	heat shock 70 kDa 12A-like	2.22954e-70	75.6%
EduN_24	PREDICTED: collagen alpha-1(III) chain-like [Aplysia californica]	3e-50	0.41	Collagen triple helix repeat/
EduN_2401	EH domain-containing 3	2.19847e-21	72.6%
EduN_2419	casein kinase II subunit beta	9.08488e-119	97%	Casein kinase II, regulatory subunit/
EduN_2436	EF-hand calcium-binding domain-containing 6-like isoform X2	1.82754e-119	80.7%	DJBP, EF-hand domain/
EduN_2441	CD209 antigen-like	9.13044e-20	54.4%	C-type lectin fold/
EduN_2446	kunitz-type precursor protease inhibitor 2	9e-33	0.95
EduN_246	heat shock cognate 71 [Mytilus galloprovincialis]	0	0.99	Heat shock protein 70 family/
EduN_2464	bromodomain-containing 3 isoform X1	8.10264e-86	75.5%	Bromodomain/
EduN_2479	EF-hand calcium-binding domain-containing 5-like isoform X1	2.20709e-45	83.4%
EduN_2484	collagen alpha-1(I) chain-like	1.08258e-11	61.63%
EduN_2496	Collagen alpha-5(VI) chain	9.43458e-152	61.7%	von Willebrand factor, type A/
EduN_252	tripartite motif-containing protein 45-like isoform X2 [Mizuhopecten yessoensis]	2e-44	0.44	B-box-type zinc finger/
EduN_2527	V-type proton ATPase subunit e	1.46238e-17	77.7777777777777%
EduN_2532	collagen alpha-2(IV) chain-like	1.23757e-115	85.7%	Collagen IV, non-collagenous/
EduN_2547	monocarboxylate transporter 12-like	5.34493e-84	81.2%	Major facilitator superfamily/
EduN_2588	disulfide-isomerase A6	1.41015e-72	79.6%	Thioredoxin domain/
EduN_2625	filamin-C-like isoform X1	8.2441e-43	87.3%
EduN_2638	carbonic anhydrase 14-like isoform X3	4.31962e-78	68.6%	Alpha carbonic anhydrase/
EduN_2649	collagen chain alpha-	4.41298e-89	67.8%	von Willebrand factor, type A/
EduN_266	putative C1q domain containing protein MgC1q11 [Mytilus galloprovincialis]	6e-119	0.93	C1q domain/
EduN_267	PREDICTED: voltage-dependent T-type calcium channel subunit alpha-1H isoform X9 [Crassostrea gigas]	5e-23	0.56
EduN_2681	caveolin-1-like	1e-23	0.64	Caveolin/
EduN_2684	filamin-C isoform X1	2.99594e-143	88.3%	Filamin/ABP280 repeat
EduN_2685	calcium-transporting ATPase sarcoplasmic endoplasmic reticulum type-like isoform X1	1.70548e-161	93.4%	Cation-transporting P-type ATPase, C-terminal/
EduN_2687	gelsolin 2	1.01599e-16	62.9%	ADF-H/Gelsolin-like domain
EduN_270	interaptin-like [Crassostrea virginica]	3e-91	0.66
EduN_2747	Adenylate kinase isoenzyme 5 [Crassostrea gigas]	4e-116	0.6	Adenylate kinase/UMP-CMP kinase
EduN_2761	Dermatopontin-like	3e-35	0.43	dermatopontin
EduN_2767	aggrecan x1 core	2.91084e-19	61%	C-type lectin fold/
EduN_277	PREDICTED: collectin-12 isoform X1 [Callorhinchus milii]	2e-18	0.36	C-type lectin fold/
EduN_2778	monocarboxylate transporter 14-like	2.62762e-62	79.6%	Major facilitator superfamily domain/
EduN_2802	disulfide-isomerase A3-like	8.80182e-66	85.1%	Thioredoxin domain/
EduN_2808	clp1 protein	3.64379e-15	57.3%	Chitinase insertion domain/
EduN_2825	Calmodulin	2e-21	0.54	EF-Hand 1, calcium-binding site/
EduN_2838	aquaporin -like	1.58817e-18	72%
EduN_288	V-type proton ATPase subunit E [Leptinotarsa decemlineata]	6e-51	0.51	ATPase, V1/A1 complex, subunit E
EduN_2882	CREB-binding isoform X4	0.0532563	90.9%	Nuclear receptor coactivator, CREB-bp-like, interlocking/
EduN_29	Collagen alpha-1(IV) chain [Habropoda laboriosa]	8e-13	0.68
EduN_290	beta-actin [Crassostrea ariakensis]	2e-110	1	Actin/actin-like conserved site
EduN_2901	von Willebrand factor type EGF and pentraxin domain-containing 1-like	5.33704e-158	57.3%	Tyrosine-protein kinase ephrin type A/B receptor-like
EduN_291	PREDICTED: actin, cytoplasmic 2 isoform X4, partial [Cricetulus griseus]	4e-70	1	Actin family/
EduN_292	actin, partial [Ips paraconfusus]	7e-85	0.98	Actin family/
EduN_2920	von Willebrand factor A domain-containing 5A isoform X1 [Xenopus tropicalis]	2.73884e-40	70.9%	VIT domain/
EduN_293	actin [Paraphidippus aurantius]	0	0.98	Actin/actin-like conserved site
EduN_2935	MT13_MYTED ame: Full=Metallothionein 10-III Short=MT-10-III	2.75068e-15	100%	Metallothionein, mollusc/
EduN_294	actin 1 [Ageniaspis citricola]	2e-72	0.99	Actin family/
EduN_2945	secreted frizzled-related 5-like	1.98448e-08	62.22%
EduN_2946	WAP four-disulfide core domain 18-like	2.46975e-10	71.7%	WAP-type 'four-disulfide core' domain/
EduN_2950	collagen alpha-1(XI) chain-like isoform X12	5.58069e-13	56.7%
EduN_2973	astacin-like metalloendopeptidase	4.67226e-12	50.1%	CUB domain/
EduN_2977	Follistatin-related 3	7.65459e-46	67.4%	Insulin-like growth factor-binding protein, IGFBP/
EduN_2984	subfamily B member 11	1.20764e-10	55.7%	Collagen triple helix repeat/
EduN_2995	arylsulfatase B-like	5.02041e-129	78.5%	Alkaline phosphatase-like, alpha/beta
EduN_3	beta-tubulin [Pinctada fucata]	2e-90	0.97	Beta tubulin/
EduN_300	beta-actin [Reishia clavigera]	5e-85	0.9	Actin family/
EduN_301	PREDICTED: actin, alpha skeletal muscle [Crassostrea gigas]	1e-85	0.98
EduN_3017	cathepsin D	1e-37	0.73	Aspartic peptidase domain/
EduN_3025	Beta-hexosaminidase	2e-41	0.44	Glycoside hydrolase family 20, catalytic domain/
EduN_3030	anosmin-1	2.62204e-06	58.1%	Galactose-binding domain-like/
EduN_3063	EF-hand domain-containing 1	1.25218e-36	71.7%	Domain of unknown function DUF1126/
EduN_3119	tensin- partial	3e-10	0.94
EduN_312	CREB-binding -like isoform X4	7e-44	0.55	Coactivator CBP, KIX domain/
EduN_3125	cleavage and polyadenylation specificity factor subunit 6-like isoform X1	2.69059e-46	83.6%
EduN_3142	filamin-A-like isoform X1	2.41035e-37	70.2%
EduN_315	PREDICTED: perlucin-like [Crassostrea gigas]	3e-12	0.39	C-type lectin fold/
EduN_3153	C1q domain containing 1q3	0	64.25%	C1q domain/
EduN_3155	V-type proton ATPase 116 kDa subunit a isoform 1-like isoform X1	1.76314e-18	83.8709677419354%
EduN_3180	collagen alpha-1(V) chain precursor	1.24724e-08	51.8%	VWFC domain/
EduN_3188	Heat shock 70 kDa 12B	6.5698e-10	59%
EduN_3197	filamin-A-like isoform X1	3.68694e-130	92.1%	Filamin/ABP280 repeat
EduN_3211	Calmodulin	1.32827e-14	96.8%
EduN_3212	Calmodulin	9.03225e-94	95%	EF-Hand 1, calcium-binding site/
EduN_3218	von Willebrand factor type EGF and pentraxin domain-containing 1-like	3.12201e-71	59.7%	HYR domain/
EduN_3254	Bcl-2 1	5.65794e-80	76.5%	Bcl2-like/
EduN_3256	Annexin A7	1.48424e-68	69.3%	Annexin repeat/
EduN_3270	filamin -1	1.88631e-158	89%	Filamin/ABP280 repeat
EduN_3277	EH domain-binding 1-like	1.3365e-32	97.2%	Domain of unknown function DUF3585/
EduN_3284	centrin-1	5.64805e-25	77.2%	EF-Hand 1, calcium-binding site/
EduN_3286	heat shock 70	0	88.4%	Heat shock protein 70 family/
EduN_3295	epidermal growth factor receptor kinase substrate 8-like isoform X1	1.56891e-15	80%	SH3 domain/
EduN_3298	cathepsin L1-like isoform X2	1.8172e-68	76.7%
EduN_3328	caveolin-1 isoform X2	4.98402e-34	81.7%	Caveolin/
EduN_333	heat shock protein 70 [Mytilus galloprovincialis]	0	0.99	Heat shock protein 70 family/
EduN_3383	CREB-binding isoform X4	4.79273e-134	87.2%
EduN_3385	peptidyl-prolyl cis-trans isomerase B-like	2.48002e-58	78.9156626506024%
EduN_34	sestrin-1-like isoform X2 [Mizuhopecten yessoensis]	4e-62	0.55	AhpD-like/
EduN_3400	Synaptotagmin-like protein 5 [Mizuhopecten yessoensis]	1e-99	0.74	C2 domain/
EduN_3404	cold shock domain-containing E1-like	6.52619e-31	81.7%
EduN_3417	thymosin beta	1.67757e-10	67.6%	Beta-thymosin/
EduN_3515	cathepsin D	6.02024e-100	78%
EduN_3553	chitin synthase	6.1245e-89	90.4%	Nucleotide-diphospho-sugar transferases/
EduN_3557	CREB-binding isoform X5	0.00681371	75.6%
EduN_357	byssal HSP-like protein 1 [Mytilus coruscus]	0	0.99	Heat shock protein 70 family/
EduN_3576	hemicentin-1-like isoform X1	3e-33	0.43	Immunoglobulin subtype/
EduN_3598	hemicentin-1-like isoform X1	7e-21	0.34	Immunoglobulin subtype/
EduN_3599	collagen alpha-3(V) chain	8.23024e-09	56.2%	Collagen triple helix repeat/
EduN_3615	Thrombospondin type-1 domain-containing 4	9.61589e-35	64.6%	PLAC/
EduN_3642	fibropellin-1-like isoform X5	6.22776e-47	60.1%	von Willebrand factor, type A/
EduN_3692	ependymin-related 1-like	1.81704e-06	47%	Ependymin/
EduN_3699	fibronectin type-III domain-containing 3A-like isoform X2	3.06645e-115	88%
EduN_371	actin, adductor muscle [Crassostrea virginica]	0	0.99	Actin/actin-like conserved site
EduN_3716	HIP_MYTED ame: Full=Heavy metal-binding HIP	4.28035e-66	91.3%
EduN_372	beta-actin, partial [Cipangopaludina cathayensis]	3e-90	0.95	Actin family/
EduN_3723	collagen alpha-1(I) chain-like	3.32696e-43	62.3%	Fibrillar collagen, C-terminal/
EduN_373	beta-actin [Meretrix meretrix]	0	0.98	Actin/actin-like conserved site
EduN_3752	collagen alpha-2(IV) chain-like	1.93901e-29	51.6%	Collagen IV, non-collagenous/
EduN_376	PREDICTED: peptidyl-prolyl cis-trans isomerase [Crassostrea gigas]	1e-123	0.85	Cyclophilin-like domain/
EduN_3777	von Willebrand factor type EGF and pentraxin domain-containing 1-like isoform X1	2.26057e-15	50%	Sushi/SCR
EduN_378	PREDICTED: actin, alpha skeletal muscle [Crassostrea gigas]	7e-86	0.98	Actin family/
EduN_3785	MYSP_MYTGA ame: Full=Paramyosin	6.62484e-32	68.8%
EduN_3802	calmodulin	1.57944e-54	91.5%	EF-Hand 1, calcium-binding site/
EduN_3806	acyl CoA- dehydrogenase	5.8532e-57	84.5%
EduN_381	ferritin-like protein, partial [Mytilus edulis]	2e-117	0.99	Ferritin/DPS protein domain
EduN_383	procollagen-proline dioxygenase beta subunit	5e-163	0.98	Disulphide isomerase/
EduN_3839	fibronectin type 3 and ankyrin repeat domains 1 isoform X3	1.20533e-75	82.5%	Fibronectin type III/
EduN_3856	tripartite motif-containing 45-like	2.26225e-50	61.4%
EduN_3865	calcyclin-binding	2.64308e-34	63%
EduN_3871	actin 6B	7.8879e-76	91.4%
EduN_3884	collagen alpha-4(VI) chain-like	8.08577e-52	59%	von Willebrand factor, type A/
EduN_3912	calmodulin	7.46256e-52	93.2%	EF-Hand 1, calcium-binding site/
EduN_3950	collagen alpha-1(XI) chain-like	2.54235e-17	67.3%
EduN_3959	laminin subunit beta-1-like	1.05897e-83	77.1%	Laminin EGF domain/
EduN_3970	C1q domain containing 1q21	1.43267e-53	60.5%	Immunoglobulin E-set/
EduN_398	heat shock 70 kDa protein 12A-like [Mizuhopecten yessoensis]	2e-43	0.72
EduN_3988	Annexin A7	1.79751e-18	90.3%	Annexin repeat/
EduN_3992	transforming growth factor-beta-induced ig-h3	9.09934e-33	54.8%	FAS1 domain/
EduN_4004	E3 ubiquitin- ligase MIB2-like isoform X1	3.57065e-73	66.7%	Mib-herc2/
EduN_4006	heat shock 70 kDa 12A-like	3.47519e-68	70.4%
EduN_4013	adenylate kinase-like isoform X1 [Mizuhopecten yessoensis]	5e-93	0.8	Adenylate kinase/UMP-CMP kinase
EduN_4022	peroxidasin partial	4.3531e-22	65.8119658119658%	Immunoglobulin subtype/
EduN_4030	galectin 2	2.10453e-90	80.6%	Concanavalin A-like lectin/glucanase domain
EduN_4053	Sushi repeat-containing SRPX2	1.95698e-07	64%	Concanavalin A-like lectin/glucanase domain
EduN_4077	ADAM 17-like protease	4.34161e-21	63.9%	Metallopeptidase, catalytic domain/
EduN_4091	chitin synthase	2.13585e-18	68.9%
EduN_4102	matrix metalloproteinase-14-like	3.7622e-67	59.9%	Hemopexin, conserved site/
EduN_4103	hemicentin-1- partial	2e-14	0.37	Immunoglobulin I-set/
EduN_4163	collagen alpha-3(VI) chain-like	2.93773e-11	60.3%
EduN_4165	heat shock 70 kDa 12A-like	4.48417e-78	68.5%
EduN_4166	heat shock 70 kDa 12A-like	1.27597e-22	72.1%
EduN_417	hemicentin-1-like isoform X1	1e-143	0.45	Immunoglobulin I-set/
EduN_4175	Multiple epidermal growth factor-like domains 10	5.89292e-47	55.2%	EGF-like domain/
EduN_4236	A disintegrin and Metalloproteinase with thrombospondin motifs 7-like	5.13279e-34	71.1%	Metallopeptidase, catalytic domain/
EduN_4238	CREBRF homolog isoform X2	3.05246e-73	73%	Basic-leucine zipper domain/
EduN_4285	gelsolin 2	2.9127e-65	75.9%	ADF-H/Gelsolin-like domain
EduN_430	Cold shock domain-containing E1	4.56393e-108	76.3%	Cold shock domain/
EduN_4332	phosphoenolpyruvate carboxykinase [GTP]-like [Crassostrea gigas]	2e-119	0.71
EduN_435	matrix metalloproteinase-14 isoform X1	1.14245e-41	64%	Hemopexin-like domain/
EduN_438	Ankyrin-1	3e-10	0.49	Ankyrin repeat/
EduN_4395	signal CUB and EGF-like domain-containing 1 isoform X1	5.14817e-53	74%	EGF-like calcium-binding domain/
EduN_441	retrograde of 51 kDa-like isoform X4	1.13008e-11	56.4%	Lamin Tail Domain/
EduN_4410	Cathepsin F	6.77994e-41	84.3%	Cysteine peptidase, cysteine active site/
EduN_4423	receptor-type tyrosine- phosphatase mu-like isoform X1	1.42147e-76	72.4%	Protein-tyrosine phosphatase, active site/
EduN_4424	Calmodulin-like protein	3.56219e-26	84.7%	EF-Hand 1, calcium-binding site/
EduN_4481	uncharacterized threonine-rich GPI-anchored glyco -like isoform X1	3.96087e-14	52.1%
EduN_4488	E3 ubiquitin- ligase TRIM33	8.81576e-31	59%	B-box-type zinc finger/
EduN_4489	filamin -	5.74486e-58	75.2%	Actinin-type actin-binding domain, conserved site/
EduN_4515	byssal tyrosinase-like protein-1 precursor [Mytilus coruscus]	1e-43	0.78
EduN_4521	PREDICTED: mucin-16 isoform X8 [Crassostrea gigas]	2e-55	0.57	Trypsin Inhibitor-like, cysteine rich domain/
EduN_4522	Calmodulin-like protein	1.27502e-35	83%
EduN_4571	aquaporin -like	4.67515e-41	70.8%	Aquaporin-like/
EduN_459	secretin receptor-like	3.38185e-23	65.3%	GPCR, family 2, secretin-like/
EduN_4594	peptidyl-prolyl cis-trans isomerase FKBP4-like isoform X2	1.99923e-09	73.5849056603773%
EduN_4610	low-density lipo receptor-related 1-like	1.97006e-10	54%	EGF-like, conserved site/
EduN_463	glucose-regulated 94	4.14262e-95	93.6046511627907%	Heat shock protein Hsp90 family/
EduN_4630	thrombospondin type-1 domain-containing protein 4-like [Mizuhopecten yessoensis]	2e-34	0.4
EduN_464	Collagen alpha-1(IV) chain	3.08048e-22	63.3%	Collagen triple helix repeat/
EduN_4656	C1q domain containing 1q6	3.00813e-65	83.88%	C1q domain/
EduN_4657	78 kDa glucose-regulated	1.48773e-20	83.2%	Heat shock protein 70 family/
EduN_4658	thrombospondin type-1 domain-containing protein 4-like [Mizuhopecten yessoensis]	1e-34	0.45	Thrombospondin type-1 (TSP1) repeat/
EduN_4676	glucose-regulated 94	0	92.1511627906976%	Heat shock protein Hsp90 family/
EduN_4714	carbonic anhydrase 2 isoform X3	3.48466e-62	80.4%	Alpha carbonic anhydrase/
EduN_475	TUBB4A isoform	3.85663e-79	99.8%	Beta tubulin/
EduN_4804	heat shock 70 kDa 12B-like	1.34347e-40	60.8%
EduN_481	Sodium-coupled monocarboxylate transporter 1	0	76.3%	Sodium/solute symporter
EduN_484	von Willebrand factor type EGF and pentraxin domain-containing 1	7.33901e-41	53.5%	HYR domain/
EduN_4847	phosphoenolpyruvate carboxykinase [GTP]-like	8e-34	0.75
EduN_4849	Neurexin-1	2.70639e-30	72.9%
EduN_4868	galectin 2	1.05928e-29	81.9%	Concanavalin A-like lectin/glucanase domain
EduN_487	actin, alpha skeletal muscle	4.27651e-88	99.2%	Actin family/
EduN_4885	Neuronal calcium sensor 2	3.88774e-27	64%	EF-Hand 1, calcium-binding site/
EduN_492	glyceraldehyde-3-phosphate dehydrogenase [Mytilus galloprovincialis]	0.0	0.99	glyceraldehyde-3-phosphate dehydrogenase, NAD binding
EduN_4922	calmodulin 3b (phosphorylase delta)	4.78854e-34	88.6%
EduN_4933	eosinophil peroxidase isoform X4	3.64539e-41	59.4%	Haem peroxidase/
EduN_4958	E3 ubiquitin- ligase TRIM33	2.2617e-13	67.75%
EduN_4966	low-density lipo receptor-related 1B-like isoform X3	1.60025e-08	54.5%	EGF-like domain/
EduN_5019	A disintegrin and Metalloproteinase with thrombospondin motifs 1	8.51283e-24	58%	PLAC/
EduN_5040	ryanodine receptor-like	2.45536e-59	90.1%	RyR/IP3R Homology associated domain
EduN_507	shell myostracum collagen-like protein 1, partial	2.71502e-35	71.8%	von Willebrand factor, type A/
EduN_508	Collagen alpha-5(VI) chain	2.19151e-32	62.4%
EduN_5080	tubulin beta-4B	4.84984e-14	100%	Tubulin/FtsZ, GTPase domain
EduN_5092	shell myostracum collagen-like protein 1, partial [Mytilus galloprovincialis]	3e-35	0.65	Leucine-rich repeat/
EduN_51	SCO-spondin like [Pinctada fucata]	3e-18	0.43	VWFC domain/
EduN_5108	Peptidyl-prolyl cis-trans isomerase B	1.10715e-14	69.8412698412698%	Cyclophilin-like domain/
EduN_5120	heat shock 70	9.54764e-72	83.8%	Heat shock protein 70 family/
EduN_5122	proteoglycan 4-like isoform X4	2.77182e-33	78.3018867924528%
EduN_5137	insulin-like growth factor 1 receptor [Tegillarca granosa]	1e-43	0.54	Fibronectin type III/
EduN_5138	Leucine-rich repeat and fibronectin type III domain-containing 1	2.96569e-33	68%
EduN_5141	shell -5	6.20838e-28	55.25%
EduN_5142	shell -5	2.07668e-18	67%
EduN_5153	annexin A7	1.82512e-63	81.6%	Annexin repeat/
EduN_5204	A disintegrin and Metalloproteinase with thrombospondin motifs 5-like isoform X1	5.63478e-58	60.8%
EduN_5208	cAMP-responsive element-binding -like 2	4.3231e-22	73.2%
EduN_5223	paired box Pax-6-like isoform X1	2.7639e-37	83.9%
EduN_5244	superoxide dismutase	2.29419e-69	91.9%	Superoxide dismutase, copper/zinc binding domain
EduN_5253	katanin p60 ATPase-containing subunit A1-like	5.19135e-29	85%
EduN_5321	hemicentin-1-like isoform X1	1e-21	0.42	Immunoglobulin I-set/
EduN_5346	leucine Rich repeat-containing domain	8.78157e-102	64.6%	Leucine-rich repeat/
EduN_5354	C1q domain containing 1q8	6.01016e-55	76.5%	C1q domain/
EduN_5376	nucleoside diphosphate kinase homolog 5-like	7.00691e-37	80.8510638297872%
EduN_541	EF-hand calcium-binding domain-containing 6-like	0	74%	EF-hand domain/
EduN_5426	amine oxidase [copper-containing]	2.5485e-16	64.7%	Copper amine oxidase, C-terminal/
EduN_5439	ADAM family mig-17	2.70206e-39	61.3%
EduN_5451	shell -5	6e-24	0.63
EduN_5462	plasma membrane calcium-transporting ATPase 2-like isoform X1	4.20831e-46	74.5%	Cation-transporting P-type ATPase, C-terminal/
EduN_550	collagen alpha type	1.75092e-20	59.8%	Collagenase NC10/endostatin
EduN_5508	EF-hand calcium-binding domain-containing 6	1.28549e-40	80%	EF-hand domain pair/
EduN_5514	A disintegrin and Metalloproteinase with thrombospondin motifs 9-like	1.38607e-68	59.6%	Peptidase M12B, GON-ADAMTSs/
EduN_5525	arylsulfatase B-like	1.64548e-81	80.1%	Alkaline phosphatase-like, alpha/beta
EduN_555	arginine kinase	0.0	0.95	phosphagen_kinase_superfamily
EduN_5568	peroxidasin partial	2.96625e-23	60%	Immunoglobulin I-set/
EduN_5594	Tubulin beta-4 chain	6.00707e-21	94.2%
EduN_564	Voltage-dependent anion-selective channel 2	4.43386e-154	84.1%	Eukaryotic porin/Tom40
EduN_5646	filamin-A-like isoform X4	5.43689e-32	73%	Filamin/ABP280 repeat
EduN_566	von Willebrand factor type EGF and pentraxin domain-containing 1-like isoform X1	4.48526e-83	53.7%
EduN_5674	multiple epidermal growth factor-like domains 6	1.97632e-19	69.2%
EduN_5722	A disintegrin andMetalloproteinase with thrombospondin motifs 4-like	2.22162e-44	60.7%
EduN_5732	centrin-1	1.51336e-20	96%
EduN_5745	casein kinase I	2.88889e-86	95.1%	Protein kinase domain/
EduN_5747	cyclin-dependent kinase inhibitor 1B-like	4.30652e-12	57.4%	Cyclin-dependent kinase inhibitor/
EduN_5760	galectin-4 isoform X1	9.63387e-16	56.4%
EduN_5763	C1q domain containing 1q32	8.47564e-56	61%	C1q domain/
EduN_579	myophilin isoform X1	7.4881e-67	72.8%	Calponin homology domain/
EduN_5868	monocarboxylate transporter 12-like isoform X1	6.43709e-63	84.7%	Major facilitator superfamily/
EduN_5870	receptor-type tyrosine- phosphatase epsilon-like	1.12608e-30	63.2%
EduN_5876	adenosine kinase 1	2e-50	0.71	Carbohydrate kinase PfkB/
EduN_5885	EF-hand calcium-binding domain-containing 6 isoform X2	2.01172e-30	76%
EduN_5888	collagen alpha type	6.32922e-06	65.7%	Collagen triple helix repeat/
EduN_5899	acid phosphatase type 7	8.65838e-31	78.3%	Calcineurin-like phosphoesterase domain, ApaH type/
EduN_5906	heat shock 70 kDa 12A-like	1.66416e-46	70.5%	Heat shock protein 70 family/
EduN_5910	heat shock 70 kDa 12A-like	2.09974e-34	58.9%
EduN_5911	calmodulin	2.3956e-21	61.5%
EduN_5945	von Willebrand factor type EGF and pentraxin domain-containing 1-like	1.192e-15	55%	Sushi/SCR
EduN_5956	cAMP-responsive element-binding -like 2	3.47174e-13	80.3%
EduN_5975	Tenascin-X	1.67064e-09	59.67%
EduN_603	copper zinc superoxide dismutase	2.32747e-08	79.9%
EduN_6063	papilin isoform X1	6.57603e-07	83.2%	Thrombospondin type-1 (TSP1) repeat/
EduN_6104	peroxidasin homolog isoform X2	2.83661e-12	55.4545454545454%
EduN_6118	annexin A7	2.01699e-57	69.1%	Annexin repeat/
EduN_6129	Cathepsin L	2.50991e-26	80%	Cysteine peptidase, asparagine active site/
EduN_6171	Cathepsin Z	1.5878e-51	81.8%	Cysteine peptidase, asparagine active site/
EduN_6195	unconventional myosin-Id-like isoform X1	4.66832e-42	90.9%	Myosin head, motor domain/
EduN_6198	Cadherin EGF LAG seven-pass G-type receptor 1	2.77019e-14	71.5%
EduN_622	ependymin-related 1-like	4.83226e-09	42.6%	Ependymin/
EduN_6221	V-type proton ATPase 21 kDa proteolipid subunit	3.76898e-25	91.0447761194029%	V-ATPase proteolipid subunit/
EduN_6244	multiple epidermal growth factor-like domains 10	1.23327e-33	64.6%
EduN_626	hemicentin-1-like, partial [Mizuhopecten yessoensis]	1e-12	0.69	Immunoglobulin I-set/
EduN_6290	hemicentin- partial	2e-17	0.42	Immunoglobulin subtype/
EduN_63	PREDICTED: nucleoside diphosphate kinase A [Crassostrea gigas]	7e-94	0.8	Nucleoside diphosphate kinase/
EduN_6308	monocarboxylate transporter 14-like	5.25434e-27	67%
EduN_6328	heat shock 70 kDa 12A-like	3.84195e-29	67.8%
EduN_6361	cathepsin D	4.08643e-24	88.4%
EduN_6377	sushi domain-containing 2-like isoform X3	6.97843e-11	60.1%
EduN_6441	C1q domain containing 1q33	1.72019e-59	74.9%
EduN_6444	heat shock 70 kDa 12A-like	6.70285e-72	65.7%
EduN_646	EF-hand domain-containing family member C2-like	0	82%	Domain of unknown function DUF1126/
EduN_6460	neurogenic locus notch homolog 1 isoform X3	4.34098e-22	68.1%	EGF-like calcium-binding domain/
EduN_647	nucleoside diphosphate kinase 7	4.472e-161	92.8%	Nucleoside diphosphate kinase/
EduN_6491	heat shock 70 kDa 12A-like	3.22904e-135	78.7%
EduN_6510	von Willebrand factor type EGF and pentraxin domain-containing 1	2.55844e-89	54.6%
EduN_6519	ankyrin repeat domain-containing	5.83852e-10	64.8%
EduN_6525	von Willebrand factor type EGF and pentraxin domain-containing 1-like	8.06506e-24	53.9%	Sushi/SCR
EduN_6553	Serine threonine- kinase H1	2.21649e-23	74.7474747474747%
EduN_6559	hemicentin-1-like isoform X1	3e-60	0.44	Immunoglobulin-like domain/
EduN_6563	Heat shock 70 kDa 12A	3.13024e-121	74.1%
EduN_6584	collagen chain alpha-	1.7763e-39	71.1%	von Willebrand factor, type A/
EduN_6589	Brother of CDO	5e-10	0.33	Immunoglobulin subtype 2/
EduN_6629	Phosphoenolpyruvate carboxykinase [GTP]	1e-26	0.72
EduN_6644	heat shock cognate	6.65189e-91	80.7%	Heat shock protein 70 family/
EduN_6654	heat shock 70 kDa 12A-like	1.82434e-13	58.7%
EduN_6662	Collagen alpha-1(XII) chain	1.05206e-18	69.6%	von Willebrand factor, type A/
EduN_6695	Matrix metalloproteinase-19	4.7286e-14	54.4%	Metallopeptidase, catalytic domain/
EduN_6697	Heat shock 70 kDa 12A	1.23293e-19	61%
EduN_673	heat shock 70 kDa 12A-like	8.54389e-40	63.2%
EduN_6743	glutathione peroxidase	1.36474e-57	83.2%	Peroxiredoxin, C-terminal/
EduN_6746	PREDICTED: dentin sialophosphoprotein isoform X1 [Crassostrea gigas]	3e-15	0.57
EduN_675	disulfide isomerase	2.78025e-144	83.7%	Disulphide isomerase/
EduN_6762	neurofilament medium polypeptide-like	9.86113e-46	76.9%
EduN_677	suppressor of tumorigenicity 14 -like isoform X1	2.13244e-34	62.5%	Low-density lipoprotein (LDL) receptor class A repeat/
EduN_6787	Cadherin-23 [Mizuhopecten yessoensis]	4e-30	0.36	Cadherin/
EduN_6851	n superoxide dismutase	1.18268e-89	68.1%	Superoxide dismutase, copper/zinc binding domain
EduN_6869	heat shock cognate	3.7292e-58	64.7%	Heat shock protein 70 family/
EduN_6870	disulfide-isomerase A6	2.18004e-34	82%	Thioredoxin domain/
EduN_69	SCO-spondin like [Pinctada fucata]	5e-18	0.42	VWFC domain/
EduN_6914	cold shock domain-containing E1-like	8.46232e-128	77.3%	Cold shock domain/
EduN_6924	glypican-6 isoform X1	4.26633e-16	79.1%
EduN_6961	tyrosine- phosphatase Lar-like isoform X2	3.06875e-64	97.3684210526315%	Protein-tyrosine phosphatase-like/
EduN_7020	collagen -	3.69154e-28	71.9%	von Willebrand factor, type A/
EduN_7022	Cadherin-23	8.76196e-14	74.9%	Cadherin/
EduN_7031	netrin receptor UNC5C-like isoform X2	4.01167e-08	57.8%	Thrombospondin type-1 (TSP1) repeat/
EduN_7034	calcitonin gene-related peptide type 1 receptor-like isoform X1	9.56994e-32	67.6%	GPCR, family 2, secretin-like/
EduN_709	calreticulin	7.79668e-178	87.8%	Calreticulin/calnexin
EduN_7143	von Willebrand factor A domain-containing 7-like	2.81236e-21	62.6%
EduN_7155	follistatin-A-like isoform X2	1.21315e-48	60.2%
EduN_7190	monocarboxylate transporter 14-like	1.17977e-22	73.7%
EduN_7194	mucin-12-like isoform X1	1.18169e-26	63%
EduN_7212	heat shock 70 kDa 12A-like	7.95417e-31	64.1%
EduN_7233	techylectin-5B- partial	4.30109e-30	78.3%
EduN_737	tubulin beta chain-like	2.50363e-144	99.2%	Beta tubulin/
EduN_7372	PREDICTED: sushi, von Willebrand factor type A, EGF and pentraxin domain-containing protein 1 isoform X1 [Crassostrea gigas]	2e-13	0.32
EduN_7383	tenascin-R	5.06046e-26	70.9%	Fibrinogen, alpha/beta
EduN_7419	heat shock 70 kDa 4 isoform X1	1.11714e-46	74.4%	Heat shock protein 70 family/
EduN_7466	dual oxidase 2-like	1.52391e-26	77.5%
EduN_7492	Collagen alpha-5(VI) chain	1.16387e-96	55.7%	von Willebrand factor, type A/
EduN_7498	septate junction	5.8511e-20	58.1%
EduN_752	V-type proton ATPase 16 kDa proteolipid subunit	1.3364e-72	96.7105263157894%	V-ATPase proteolipid subunit/
EduN_7694	collagen alpha-1(XII) chain-like	1.11899e-12	53%
EduN_7698	PREDICTED: mucin-2-like	9.49673e-06	62.9629629629629%	Concanavalin A-like lectin/glucanase domain
EduN_7711	paraplegin isoform X1	1.02593e-22	85.8%	ATPase, AAA-type, core/
EduN_7738	monocarboxylate transporter 7-like	1.16686e-16	68.6%
EduN_7766	78 kDa glucose-regulated	9.10346e-37	95%	Heat shock protein 70 family/
EduN_7769	cadherin-23-like isoform X1	1.38261e-08	54.4%	Cadherin-like/
EduN_7774	chitinase 3	2.01792e-35	70%	Chitinase insertion domain/
EduN_7782	Neuronal acetylcholine receptor subunit alpha-10	2e-44	0.57	Neurotransmitter-gated ion-channel ligand-binding domain/
EduN_7788	heat shock 70 kDa 12A-like	4.22331e-70	64.8%
EduN_7799	Chitin synthase 1	8.7341e-59	94.5%	Nucleotide-diphospho-sugar transferases/
EduN_7805	receptor-type t tyrosine-	4.36542e-34	67.4%
EduN_7839	heat shock 70 kDa 12A-like	7.51673e-32	66.5%
EduN_7843	Gelsolin 2	1.06453e-50	85%	ADF-H/Gelsolin-like domain
EduN_7875	von Willebrand factor type EGF and pentraxin domain-containing 1-like	9.93368e-11	65.6%
EduN_79	PREDICTED: protein PIF-like [Crassostrea gigas]	2e-75	0.32	Chitin binding domain/
EduN_792	zonadhesin-like isoform X2 [Mizuhopecten yessoensis]	4e-122	0.45	Carbohydrate-binding WSC/
EduN_7961	EF-hand domain-containing family member B-like	2.92899e-36	88.4%
EduN_7990	paired box Pax-6-like isoform X1	3.13107e-52	67.1%	Homeobox domain/
EduN_8080	voltage-dependent L-type calcium channel subunit beta-1-like isoform X3	1.45773e-25	98.1818181818181%	Guanylate kinase/L-type calcium channel beta subunit
EduN_8119	monocarboxylate transporter 12-like	4.93041e-33	73%	Major facilitator superfamily domain/
EduN_8120	peptidyl-prolyl cis-trans isomerase dodo	3.47982e-29	71%	WW domain/
EduN_8153	frizzled 4	8.50103e-63	89%	Frizzled/Smoothened, transmembrane domain
EduN_817	gelsolin	1e-46	0.82
EduN_8175	gelsolin isoform X1	1.29969e-46	87.4%	ADF-H/Gelsolin-like domain
EduN_8180	A disintegrin and Metalloproteinase with thrombospondin motifs 2	2.69539e-32	62.6%	Thrombospondin type-1 (TSP1) repeat/
EduN_822	fibronectin type-III domain-containing 3A-like isoform X3	2.82114e-77	86%
EduN_831	heat shock 70 kDa 12B-like	1.22584e-06	49.9%
EduN_835	collagen alpha-1(I) chain-like	6.60515e-42	58%	Collagen triple helix repeat/
EduN_837	MYSP_MYTGA ame: Full=Paramyosin	0	91.6%	Myosin tail/
EduN_854	Collagen triple helix repeat (20 copies)	2.96142e-08	63.14%
EduN_865	peroxidasin partial	5.436e-24	62.8205128205128%	Immunoglobulin subtype/
EduN_870	Runt-related transcription factor 1	1.77113e-129	58.4%
EduN_873	mytilin C precursor	2.27991e-33	78.2%	Myticin preproprotein/
EduN_88	putative C1q domain containing protein MgC1q84 [Mytilus galloprovincialis]	3e-27	0.52
EduN_930	EF-hand calcium-binding domain-containing 6-like isoform X2	1.20056e-47	92.2%	EF-hand domain/
EduN_941	sodium calcium exchanger 3-like isoform X2	2.15464e-52	80.1%
EduN_954	paired box Pax-8-like isoform X4	6.92184e-50	60.8%
EduN_956	homeobox 4-like	1.87843e-24	58.2781456953642%
EduN_976	tubulin beta chain-	3.53819e-101	98.9%	Beta tubulin/
EduN_977	tubulin beta chain-like	4.75507e-124	98.9%	Beta tubulin/
GalM_100	hemin receptor	2.46914e-13	54.6%	Globin/
GalM_101	nucleoside diphosphate kinase	1.81246e-92	88.0952380952381%	Nucleoside diphosphate kinase/
GalM_1020	amiloride-sensitive amine oxidase [copper-containing]-like	1.43155e-30	61.4%	Copper amine oxidase, N-terminal/
GalM_1023	superoxide dismutase [Cu-Zn]-like	5.35434e-56	74.8%	Superoxide dismutase, copper/zinc binding domain
GalM_1029	neuronal acetylcholine receptor subunit alpha-2-like	6.19328e-27	61.8%	Neurotransmitter-gated ion-channel ligand-binding domain/
GalM_1032	transforming growth factor-beta-induced ig-h3-like	2.50412e-40	56.3%	FAS1 domain/
GalM_1038	fibronectin type-III domain-containing 3A isoform X4	1.34643e-44	86.6%	Fibronectin type III/
GalM_1039	tubulin beta	1.76585e-53	100%	Tubulin/FtsZ, C-terminal
GalM_1052	plasma membrane calcium-transporting ATPase 2-like isoform X1	7.17302e-95	88.8%	P-type ATPase, A domain/
GalM_1063	cathepsin L1-like isoform X1	1.02424e-137	81.2%	Cysteine peptidase, asparagine active site/
GalM_1074	titin-like isoform X1	1.78566e-39	64.5%
GalM_1076	Calreticulin	9.49854e-32	83%
GalM_1086	SCO-spondin partial	2e-71	0.4	Cystine knot, C-terminal/
GalM_1087	disulfide-isomerase A3-like	3.26775e-59	72.7%	Thioredoxin-like fold/
GalM_1088	sodium potassium-transporting ATPase subunit alpha-like	0	89.4%	HAD-like domain/
GalM_1096	insulin-like growth factor 1 receptor	8.5161e-35	63%	Fibronectin type III/
GalM_1099	retrograde of 51 kDa-like isoform X4	1.04704e-123	75.6%	Intermediate filament protein/
GalM_110	actin, cytoplasmic 1	7.9272e-98	89.9%
GalM_111	actin type	1.28478e-66	97.4%	Actin family/
GalM_1116	sarco endoplasmic reticulum calcium ATPase isoform A	1.049e-105	97.3%
GalM_1118	SD-rich - partial	1.96758e-25	89%
GalM_112	actin, adductor muscle	0	99.4%	Actin/actin-like conserved site
GalM_1121	Follistatin-related 3	4.24696e-45	69%	Kazal domain/
GalM_1152	telomerase component 1-like	8.19318e-54	81.9%
GalM_1175	unconventional myosin-Id-like isoform X1	5.66962e-68	92.4%	Myosin head, motor domain/
GalM_1189	calreticulin	1.73628e-49	88.1481481481481%
GalM_1194	Atrial natriuretic peptide-converting enzyme	1.48742e-24	67.4%	Low-density lipoprotein (LDL) receptor class A repeat/
GalM_1231	fibroblast growth factor receptor 4-like isoform X1	2.18256e-25	58.4%
GalM_1235	fibrinogen C domain-containing 1-like isoform X1	4e-61	0.86	Fibrinogen, alpha/beta
GalM_1265	disulfide isomerase	0	81.5%	Disulphide isomerase/
GalM_127	ferritin 2	1.41785e-116	94.2%	Ferritin/DPS protein domain
GalM_1280	copper zinc superoxide dismutase	1.00271e-14	60.1%
GalM_1299	calcium-transporting ATPase sarcoplasmic endoplasmic reticulum type-like	1.24788e-143	96%	HAD-like domain/
GalM_1308	Collagen alpha-1(IV) chain	8.79611e-40	83.7%	Collagen IV, non-collagenous/
GalM_1313	cathepsin D	7.96282e-73	78.5%	Aspartic peptidase A1 family/
GalM_1322	von Willebrand factor type EGF and pentraxin domain-containing 1-	1.78243e-46	58.2%	Sushi/SCR
GalM_1333	laminin subunit alpha-like	1.60268e-43	63.8%	Concanavalin A-like lectin/glucanase domain
GalM_1344	alpha-2-macroglobulin [Pinctada fucata]	6e-69	0.6	Alpha-macroglobulin complement component/
GalM_1369	thymosin beta isoform X1	4.27763e-74	66.4%	Beta-thymosin/
GalM_1376	telomerase component 1-like	3.27e-28	73%
GalM_1408	fructose-bisphosphate aldolase	8.11157e-81	89.2%	Aldolase-type TIM barrel/
GalM_142	heat shock cognate 70	6.51959e-138	97.6%	Heat shock protein 70 family/
GalM_1428	copper zinc superoxide dismutase	1.20628e-23	65%	Reverse transcriptase domain/
GalM_1445	small heat shock protein 24.1 [Mytilus galloprovincialis]	3e-22	1
GalM_1457	Laminin subunit alpha	4.54974e-46	72.3%	Laminin EGF domain/
GalM_1461	calmodulin	3.52413e-40	99.7%	EF-Hand 1, calcium-binding site/
GalM_1472	casein kinase II subunit beta	2.68115e-84	97.9%
GalM_1476	collagen alpha-1(XII) chain-like isoform X2	4.40023e-31	55.3%	von Willebrand factor, type A/
GalM_1479	fibrillar collagen	5.16333e-18	63.1067961165048%	Fibrillar collagen, C-terminal/
GalM_1509	two pore calcium channel 1	3.75925e-36	69.3%
GalM_1515	mucin-12-like isoform X1	5.84993e-88	93.4%	Zinc finger, nuclear hormone receptor-type/
GalM_153	mytchitin 4	1.02912e-22	88%	Glycoside hydrolase family 18, catalytic domain/
GalM_1561	sushi domain-containing 2-like isoform X2	1.90641e-68	70.4%	AMOP domain/
GalM_1566	Shell matrix	1.16655e-134	61.7%
GalM_1569	zonadhesin-like isoform X3	2e-13	0.44
GalM_1574	Sodium potassium-transporting ATPase subunit alpha	1.38434e-71	92.9%	Cation-transporting P-type ATPase, C-terminal/
GalM_1592	Collagen alpha-1(IV) chain	5.56396e-08	61.5%	Collagen triple helix repeat/
GalM_1602	fibronectin type-III domain-containing 3A-like isoform X4	2.4857e-112	89%	Fibronectin type III/
GalM_1630	PREDICTED: protein PIF-like [Crassostrea gigas]	2e-32	0.31	Chitin binding domain/
GalM_1639	suppressor of tumorigenicity 14 -like isoform X2	2.94207e-31	64.6%
GalM_1648	Fibroblast growth factor receptor	1.00302e-38	53.8%
GalM_1669	monocarboxylate transporter 2-like	2.9401e-54	75.6%
GalM_1677	peptidyl-prolyl cis-trans isomerase-like	3.50607e-74	96.2962962962962%	Cyclophilin-like domain/
GalM_171	calmodulin-binding transcription activator 2-like isoform X1	1.1687e-38	84.5%
GalM_1726	monocarboxylate transporter 14-like	4.27411e-40	82.5%	Major facilitator superfamily domain/
GalM_1731	fructose-bisphosphate	2.14923e-51	70.3%
GalM_1734	collagen alpha-2(IV) chain	2.34495e-08	72.9%	Collagen triple helix repeat/
GalM_174	fibril-forming collagen alpha chain-like	8.24884e-27	69.2%	Collagen triple helix repeat/
GalM_1743	V-type proton ATPase 116 kDa subunit a isoform 1-like isoform X1	4.29198e-17	61.6071428571428%
GalM_1755	galectin 2	2.31836e-73	82.9%	Concanavalin A-like lectin/glucanase domain
GalM_1794	tubulin beta chain	1.02011e-62	96.3%	Beta tubulin/
GalM_1806	sodium potassium-transporting ATPase subunit alpha-like	1.48139e-109	81.1%	P-type ATPase, A domain/
GalM_1808	low-density lipo receptor-related 5	1.19953e-58	86.3%	LDLR class B repeat/
GalM_181	collagen alpha-1(I) chain-like	1.04457e-14	62.9%	Fibrillar collagen, C-terminal/
GalM_1821	Laminin subunit beta-1	3.39234e-88	71.2%	Laminin EGF domain/
GalM_1832	hemicentin-1-like isoform X1	7e-18	0.36	Immunoglobulin subtype/
GalM_1833	ryanodine receptor-like	8.30764e-64	74.1%
GalM_1847	collagen alpha-1(XVIII) chain-like	1.05558e-24	58.7%	Collagen triple helix repeat/
GalM_190	filamin -1	0	83.8%	Filamin/ABP280 repeat
GalM_1910	PREDICTED: putative uncharacterized oxidoreductase YDR541C [Crassostrea gigas]	3e-167	0.82	NAD(P)-binding domain/
GalM_1914	vitellogenin	1.73211e-21	59.4%	von Willebrand factor, type D domain/
GalM_1915	cathepsin B	5.28438e-65	86%	Cysteine peptidase, asparagine active site/
GalM_1919	copper zinc superoxide dismutase	2.80138e-65	59.6%
GalM_192	MYSP_MYTGA ame: Full=Paramyosin	0	90.6%	Myosin tail/
GalM_1926	myophilin isoform X1	1.94548e-18	65.5%	Calponin homology domain/
GalM_1940	galectin 1	4.87726e-09	60%
GalM_1946	low-density lipo receptor-related 2	9.9218e-14	56.8%
GalM_1950	epidermal growth factor receptor kinase substrate 8 isoform X1	3.91221e-63	60%
GalM_1968	calreticulin	7.20066e-58	90.0709219858156%	Calreticulin/calnexin
GalM_1971	ankyrin-2	1e-34	0.67	Death domain/
GalM_1980	phosphoenolpyruvate carboxykinase [GTP]-like	2e-85	0.8
GalM_203	peptidyl-prolyl cis-trans isomerase A	3.96978e-55	91.2621359223301%	Cyclophilin-like domain/
GalM_2053	von Willebrand factor A domain-containing 8-like	9.80128e-60	83.9%
GalM_2056	fibropellin-1-like [Stylophora pistillata]	4e-10	0.38	EGF-like domain/
GalM_2064	Lectin	9.65114e-55	82.3%
GalM_2073	ankyrin-3-like isoform X18	1.10564e-51	85.4%	Ankyrin repeat/
GalM_2095	monocarboxylate transporter 12-like	2.01605e-32	77.7%	Major facilitator superfamily domain/
GalM_2109	calponin -1	5.64526e-153	85%	Calponin homology domain/
GalM_2114	flocculation FLO10	3.17373e-68	61.7%
GalM_2189	laminin subunit alpha-like	4.88451e-47	76.8%	EGF-like, conserved site/
GalM_2206	collagen alpha-1(I) chain-like	5.9645e-12	52.7%
GalM_2241	ankyrin-2	6e-98	0.72
GalM_2262	plasminogen-like x2	3.40961e-93	71.7%	C-type lectin fold/
GalM_2296	tetratricopeptide repeat 22	9.10686e-10	54.25%
GalM_2312	small heat shock protein 24.1 [Mytilus galloprovincialis]	6e-25	0.84
GalM_2327	synaptotagmin-16-like isoform X1	4.63327e-39	89.7%	C2 domain/
GalM_233	heat shock 90	0	94.9%	Heat shock protein Hsp90 family/
GalM_2359	calreticulin	2.48932e-57	91.5662650602409%	Calreticulin/calnexin
GalM_2363	tyrosine- phosphatase 99A-like isoform X1	1.80766e-26	70.754716981132%
GalM_2384	Dermatopontin-like	4e-22	0.53	dermatopontin
GalM_2406	ryanodine receptor 2-like	1.8413e-23	75.8%
GalM_2411	CREB-binding -like isoform X4	9.53758e-42	86.4%
GalM_2418	collagen alpha-3(VI) chain	8.60962e-26	69.3%
GalM_2420	twitchin -1	6.82632e-81	82.6%
GalM_245	filamin-A-like isoform X1	3.65127e-115	73.7%	Filamin/ABP280 repeat
GalM_246	filamin-C isoform X1	4.18085e-33	79.5%	Filamin/ABP280 repeat
GalM_2478	Synaptotagmin-like protein 5 [Mizuhopecten yessoensis]	3e-13	0.56
GalM_2487	Sodium-coupled monocarboxylate transporter 1	1.34102e-31	73.1%	Sodium/solute symporter
GalM_251	cathepsin L1-like	3.03724e-25	80.6%
GalM_2521	collagen alpha-1(I) chain-like	1.19023e-11	55.7%	Concanavalin A-like lectin/glucanase domain
GalM_2539	V-type proton ATPase 116 kDa subunit a isoform 1-like isoform X1	1.27092e-39	58.3783783783783%
GalM_2540	gelsolin 2	1.29036e-12	64.1%
GalM_2548	collagen triple helix repeat family protein, partial [Streptococcus pyogenes AA472]	8e-06	0.58	Collagen triple helix repeat/
GalM_2551	sushi domain-containing 2 isoform X1	3.27563e-17	65.3%	von Willebrand factor, type D domain/
GalM_2559	matrix metalloproteinase 1	0.000715739	79.3%	Hemopexin-like domain/
GalM_2563	Laminin subunit alpha	5.05497e-102	88.8%
GalM_2581	sushi domain-containing 2 isoform X1	1.3096e-21	56.8%	Immunoglobulin-like fold/
GalM_2604	heat shock cognate	1.33486e-68	97%	Heat shock protein 70 family/
GalM_2611	Synaptopodin 2	5.36995e-06	58%
GalM_2643	zonadhesin	4e-16	0.34	von Willebrand factor, type D domain/
GalM_2675	collagen alpha-6(VI) chain-like	2.07982e-06	64.8%	von Willebrand factor, type A/
GalM_2695	plasma membrane calcium-transporting ATPase 3 isoform X7	2.23581e-51	67.3%	HAD-like domain/
GalM_2708	metalloproteinase inhibitor 3	1.9753e-18	48.5%	Protease inhibitor I35 (TIMP)/
GalM_2715	copper zinc superoxide dismutase	9.7831e-19	64.3%
GalM_2718	von Willebrand factor type EGF and pentraxin domain-containing 1	7.21188e-27	57.9%
GalM_272	twitchin isoform X2	4.09579e-87	54.8%	Fibronectin type III/
GalM_276	monocarboxylate transporter 12-like	0	63.8%	Major facilitator superfamily/
GalM_2789	collagen type IV alpha-3-binding	2.92938e-51	77.5%
GalM_2796	heat shock 70 kDa 12A-like	2.43521e-23	73.3%
GalM_2836	Dermatopontin-like	3e-19	0.95	dermatopontin
GalM_2838	Tenascin-X	1.44241e-14	64.3%
GalM_2842	E3 ubiquitin- ligase TRIM33-like isoform X2	1.02539e-15	69.9%
GalM_2845	Low-density lipo receptor-related 4	6.24901e-16	61.6%
GalM_289	beta-actin, partial	7.62758e-110	100%	Actin/actin-like conserved site
GalM_290	beta-actin, partial	4.93229e-108	99.9%	Actin/actin-like conserved site
GalM_2907	collagen 3	7.43766e-05	68.9%
GalM_2930	synaptotagmin-1 isoform X1	4.41652e-79	96.3%	C2 domain/
GalM_2932	CREB-regulated transcription coactivator 1-like isoform X2	6.65389e-21	74.5%	Transducer of regulated CREB activity, middle domain/
GalM_2937	hemicentin-1-like isoform X1	3e-12	0.44	Immunoglobulin subtype/
GalM_2958	Neurexin-1	1.77633e-24	70.1%	Concanavalin A-like lectin/glucanase domain
GalM_2997	CREBRF homolog isoform X2	3.0498e-15	68.7%
GalM_3028	calcium-dependent secretion activator 1-like isoform X4	7.32881e-29	85.2%	Calcium-dependent secretion activator domain/
GalM_3045	vascular endothelial growth factor receptor 1-like isoform X1	4.66475e-65	75.2%	Protein kinase domain/
GalM_308	heat shock 90	5.40401e-35	89.6%	Heat shock protein Hsp90, conserved site/
GalM_3085	Calcium-dependent kinase C	1.93548e-24	96.4%
GalM_3102	rabankyrin-5 isoform X1	4.5572e-44	86.6%	Ankyrin repeat/
GalM_3104	Peptidyl-prolyl cis-trans isomerase-like 4	1.09794e-20	95.9183673469387%
GalM_3111	peptidyl-prolyl cis-trans isomerase B	3.08707e-64	92.5233644859813%	Cyclophilin-like domain/
GalM_3118	cartilage matrix -like isoform X1	7.45241e-16	59.7%	von Willebrand factor, type A/
GalM_3126	Chitin synthase 8	6.23162e-37	74.7%
GalM_3144	laminin subunit alpha-like	0.537982	65.5%
GalM_3153	asparagine synthetase	8.30411e-10	55.2%
GalM_3178	katanin p60 ATPase-containing subunit A1-like	1.6417e-49	88.5%
GalM_3210	fibronectin type-III domain-containing 3A isoform X4	1.52926e-36	87.5%
GalM_3228	ankyrin-2-like isoform X7	4.35556e-29	85.2%
GalM_324	tubulin beta chain	9.61815e-38	100%	Beta tubulin/
GalM_325	tubulin beta	2.06324e-60	100%	Tubulin/FtsZ, C-terminal
GalM_326	tubulin beta chain	2.76213e-42	100%	Beta tubulin/
GalM_3317	spectrin beta chain isoform X1	4.05133e-49	84%
GalM_3332	Gelsolin 2	9.61039e-32	84.7%	ADF-H/Gelsolin-like domain
GalM_3348	monocarboxylate transporter 9	3.91016e-32	67.4%	Major facilitator superfamily domain/
GalM_35	nacre c1q domain-containing	1.12513e-77	86.1%	C1q domain/
GalM_352	cartilage matrix -like	5.52677e-98	71%	von Willebrand factor, type A/
GalM_359	cold shock domain-containing E1-like	0	66.8%	Cold shock domain/
GalM_36	C1q domain containing 1q6	1.38914e-69	92.7%	C1q domain/
GalM_365	ACTC_BIOAL ame: Full= cytoplasmic Contains: ame: Full= intermediate form Flags: Precursor	0	98.6%	Actin/actin-like conserved site
GalM_366	actin, alpha skeletal muscle	3.85154e-95	97.5%
GalM_37	HIP_MYTED ame: Full=Heavy metal-binding HIP	1.05615e-33	99.75%	C1q domain/
GalM_376	Fibrillin- partial	9.45078e-24	74.4680851063829%
GalM_38	HIP_MYTED ame: Full=Heavy metal-binding HIP	3.29192e-24	95.67%	C1q domain/
GalM_39	C1q domain containing 1q6	5.00899e-58	84.8%	C1q domain/
GalM_393	transforming growth factor-beta-induced ig-h3-like	1.90169e-79	58.6%	FAS1 domain/
GalM_395	very low-density lipo receptor-like isoform X2	4.85209e-147	72.5%	LDLR class B repeat/
GalM_41	filamin-A-like isoform X1	1.15467e-60	70.7%	Filamin/ABP280 repeat
GalM_411	C1q domain containing 1q16	5.10879e-41	66.9%	C1q domain/
GalM_451	filamin -	0	89.4%	Calponin homology domain/
GalM_470	PREDICTED: glyceraldehyde-3-phosphate dehydrogenase, cytosolic [Erythranthe guttata]	2e-153	0.81	glyceraldehyde-3-phosphate dehydrogenase, NAD binding
GalM_481	small heat shock protein 24.1 [Mytilus galloprovincialis]	3e-35	0.77	HSP20-like chaperone/
GalM_487	Laminin subunit beta-1	1.75407e-57	72.7%	EGF-like, conserved site/
GalM_503	mucin-17 isoform X10	3e-149	0.52	Low-density lipoprotein (LDL) receptor class A repeat/
GalM_511	copper zinc superoxide dismutase	6.8588e-19	65.1%
GalM_512	copper zinc superoxide dismutase	9.82425e-30	62.8%
GalM_543	fibril-forming collagen alpha chain-like	3.82675e-68	58.4%	Collagen triple helix repeat/
GalM_549	Collagen alpha-5(VI) chain	0	63.2%	von Willebrand factor, type A/
GalM_561	sarcoplasmic calcium-binding	2.35873e-09	60.8%	EF-Hand 1, calcium-binding site/
GalM_572	thrombospondin-2-like isoform X1	3.89691e-35	57.8%
GalM_574	nacre Gly-rich 1	1.30637e-38	84.67%
GalM_590	Tyrosine- phosphatase 10D	2.50285e-19	55.2631578947368%
GalM_597	heat shock 70	1.69104e-134	96.8%	Heat shock protein 70 family/
GalM_598	Tenascin-X	2.48238e-21	71.6%
GalM_601	myophilin isoform X2	2.50695e-31	80.2%	Calponin homology domain/
GalM_628	fibronectin type-III domain-containing 3A isoform X4	1.9374e-30	69%	Fibronectin type III/
GalM_632	neuronal acetylcholine receptor subunit alpha-10-like isoform X1	9.95799e-17	55.9%	Neurotransmitter-gated ion-channel ligand-binding domain/
GalM_653	voltage-dependent anion-selective channel 2	1.04019e-127	74.4%	Eukaryotic porin/Tom40
GalM_654	mucin-2-like isoform X1	2e-72	0.37	Trypsin Inhibitor-like, cysteine rich domain/
GalM_694	SCO-spondin	8e-24	0.38
GalM_703	Sarcoplasmic calcium-binding	3.74707e-10	68.4%
GalM_707	protease inhibitor-like protein-D2 [Mytilus coruscus]	2e-53	0.76	Alpha-macroglobulin, receptor-binding/
GalM_71	heat shock 70	0	97.4%	Heat shock protein 70 family/
GalM_755	laminin subunit beta-1-like	8.98319e-88	67%	Laminin EGF domain/
GalM_763	collagen alpha-1(I) chain-like	2.81905e-30	67.7%	Collagen triple helix repeat/
GalM_77	tubulin beta chain isoform X1	4.47515e-135	100%	Beta tubulin/
GalM_774	tyrosine- phosphatase Lar-like isoform X4	7.11038e-86	97.8571428571428%	Protein-tyrosine phosphatase, active site/
GalM_78	tubulin beta-4B chain isoform X5	1.85958e-171	100%	Beta tubulin/
GalM_80	tubulin beta 2	2.84375e-97	99.9%	Beta tubulin/
GalM_81	tubulin beta chain-like	4.25837e-50	97%	Epsilon tubulin/
GalM_829	glutathione peroxidase-like	2.66135e-79	73.8461538461538%	Glutathione peroxidase/
GalM_837	Phosphoenolpyruvate carboxykinase [GTP]	5e-92	0.59
GalM_839	lysozyme	9.58533e-103	98.8095238095238%	Invertebrate-type lysozyme/
GalM_84	mucin-16-like [Crassostrea virginica]	1e-28	0.42	Thrombospondin type-1 (TSP1) repeat/
GalM_847	collagen alpha-1(XI) chain-like	5.59779e-39	67.7%	Fibrillar collagen, C-terminal/
GalM_865	C1q domain containing 1q71	5.49433e-27	64.4%	C1q domain/
GalM_879	annexin A7-like isoform X2	5.74139e-80	90.8%	Annexin/
GalM_885	transgelin -3	4.81191e-104	92.6%	Calponin homology domain/
GalM_887	arginine kinase	0.0	0.94	phosphagen_kinase_superfamily
GalM_91	leucine rich	2.99969e-20	81.9%
GalM_911	mothers against decapentaplegic homolog 5-like	6.47874e-46	70.5035971223021%
GalM_920	neogenin-like isoform X3	3.17673e-20	75.8%	Fibronectin type III/
GalM_955	matrix metalloproteinase-2-like	1.40719e-94	75.2%	Metallopeptidase, catalytic domain/
GalM_958	collagen alpha-1(I) chain-like	6.45262e-36	63.5%	Fibrillar collagen, C-terminal/
GalM_981	c-type f lectin domain family 4	1.06399e-07	53%	C-type lectin fold/
GalM_982	stromelysin-3-like isoform X2	1.38186e-22	54.7%
GalM_985	monocarboxylate transporter 14-like	5.65625e-90	74.8%	Major facilitator superfamily/
GalM_990	mucin-16 isoform X7	3e-48	0.39	Trypsin Inhibitor-like, cysteine rich domain/
GalM_996	hemicentin-1- partial	2e-29	0.53	Immunoglobulin I-set/
GalT_1009	FRAS1-related extracellular matrix 1	6.4632e-18	54.3%	C-type lectin fold/
GalT_102	fibril-forming collagen alpha chain-like	2.5534e-63	58.3%	Collagen triple helix repeat/
GalT_1039	neuropilin and tolloid 2	5.13195e-10	50.1%	Low-density lipoprotein (LDL) receptor class A repeat/
GalT_1041	von Willebrand factor A domain-containing 5A	3e-06	0.38
GalT_1045	cold shock domain-containing E1-like	2.8255e-101	77.7%	Cold shock domain/
GalT_1046	collagen alpha-1(XI) chain-like	2.2239e-10	48.75%
GalT_1066	Dermatopontin-like	4e-35	0.43	dermatopontin
GalT_1069	neurexin-4 isoform X1	1.08725e-113	80%	Concanavalin A-like lectin/glucanase domain
GalT_108	C1q domain containing 1q27	7.07589e-32	74.2%	C1q domain/
GalT_1081	C1q domain containing 1q8	1.10608e-108	65.9%	C1q domain/
GalT_1091	Caveolin-1	1.36779e-39	72.8%	Caveolin/
GalT_11	collagen alpha-1(I) chain- partial	2.87955e-52	76.9%
GalT_1108	cathepsin L1-like isoform X1	1.78358e-50	79%	Peptidase C1A, papain C-terminal/
GalT_1120	shell fibrous prismatic perlucin 1	8.06221e-42	58.5%	C-type lectin fold/
GalT_1129	C1q domain containing 1q12	2.3548e-79	65.2%	C1q domain/
GalT_1130	EP precursor	2.35678e-125	90%	C1q domain/
GalT_1138	fibronectin type-III domain-containing 3A-like isoform X3	4.94803e-89	83%	Fibronectin type III/
GalT_1140	heat shock 70	1.16343e-102	82.6%	Heat shock protein 70 family/
GalT_1141	heat shock 70	4.53453e-108	95.7%	Heat shock protein 70 family/
GalT_1148	unconventional myosin-XV-like isoform X1	2.0474e-41	97%	Myosin head, motor domain/
GalT_1160	cytoplasmic A3a	6.56393e-49	98%
GalT_12	mucin-17 isoform X10	6e-126	0.39	Cystine knot, C-terminal/
GalT_121	complement C1q 4	6.52949e-10	68.8%	C1q domain/
GalT_123	ACTC_BIOAL ame: Full= cytoplasmic Contains: ame: Full= intermediate form Flags: Precursor	0	98.6%	Actin/actin-like conserved site
GalT_1230	Transforming growth factor-beta-induced ig-h3	2.35788e-53	57.5%	FAS1 domain/
GalT_1231	calreticulin	3.1e-140	0.75	Calreticulin/calnexin
GalT_126	actin, adductor muscle	0	99.6%	Actin/actin-like conserved site
GalT_127	actin isoform	6.80956e-72	100%	Actin family/
GalT_1278	cadherin EGF LAG seven-pass G-type receptor 1-like	1.05312e-36	71.8%
GalT_1281	Bcl-2 1	1.14003e-82	84.8%	Apoptosis regulator, Bcl-2, BH2 motif, conserved site/
GalT_1284	PREDICTED: mucin-17-like	5.13265e-10	60.5%	von Willebrand factor, type D domain/
GalT_1324	contactin-associated -like 4	7.19505e-25	58.6%
GalT_1341	collagen alpha-1(I) chain-like	5.29297e-69	64.5%	Fibrillar collagen, C-terminal/
GalT_1355	actin beta gamma 1	6.63098e-54	66.7%	Actin family/
GalT_1392	polycystic kidney disease 1-like	3.09748e-10	65.6%	D-galactoside/L-rhamnose binding SUEL lectin domain
GalT_1397	Cathepsin F	5.756e-47	76.2%	Cysteine peptidase, cysteine active site/
GalT_1425	c-type f lectin domain family 4	1.03228e-63	67.1%	C-type lectin fold/
GalT_1448	period clock	4.3943e-33	76.1%	VWFC domain/
GalT_146	Collagen alpha-3(VI) chain	1.23114e-64	81.6%	von Willebrand factor, type A/
GalT_1464	EF-hand calcium-binding domain-containing 6-like isoform X2	6.25964e-69	91.6%	EF-hand domain/
GalT_148	collagen-like protein-8, partial [Mytilus galloprovincialis]	2e-67	0.98	von Willebrand factor, type A/
GalT_1507	hillarin-like isoform X3 [Mizuhopecten yessoensis]	3e-71	0.79
GalT_1514	von Willebrand factor type EGF and pentraxin domain-containing 1 isoform X2	1.12807e-33	65.4%	CUB domain/
GalT_1524	aquaporin -like	1.99892e-57	83.4%	Aquaporin-like/
GalT_153	tubulin beta 2	1.3163e-73	84.9%	Beta tubulin/
GalT_1537	nidogen and EGF-like domain-containing 1	9.65781e-16	68.8%
GalT_154	tubulin beta chain	0	99.7%	Beta tubulin/
GalT_155	tubulin beta 2	1.50805e-152	99.9%	Beta tubulin/
GalT_1586	collagen alpha-1(I) chain-like	2.46663e-32	68.3%	Collagen triple helix repeat/
GalT_1595	fibronectin type 3 and ankyrin repeat domains 1 -like isoform X1	8.94759e-09	60.1%
GalT_164	Voltage-dependent anion-selective channel 2	1.48731e-131	83.6%	Eukaryotic porin/Tom40
GalT_1653	macrophage mannose receptor 1-like	4.55541e-79	52.7%	C-type lectin fold/
GalT_1694	calcium-binding LPS1-beta-like	1.66677e-20	54.6%	EF-Hand 1, calcium-binding site/
GalT_1706	CREB-binding -like isoform X6	1.42247e-09	76%
GalT_173	nucleoside diphosphate kinase A 1	6.6e-25	0.874	Nucleoside diphosphate kinase, active site/
GalT_1787	retrograde of 51 kDa-like isoform X2	7.11916e-07	60%
GalT_181	galectin 2	2.09275e-51	69.3%	Concanavalin A-like lectin/glucanase domain
GalT_182	galectin-9 isoform X2	4.82685e-60	78.6%	Concanavalin A-like lectin/glucanase domain
GalT_1838	probable chitinase 10	2e-33	60.3%	Chitinase insertion domain/
GalT_1845	calponin -2	1.26544e-50	82%	Calponin repeat/
GalT_1850	Matrix metalloproteinase-16	1.72297e-32	67.7%	Metallopeptidase, catalytic domain/
GalT_1923	fibroblast growth factor receptor 2-like isoform X1	6.59175e-31	60.2%	Immunoglobulin subtype/
GalT_1980	programmed cell death 6-like isoform X2	9.91806e-84	93.4%	EF-Hand 1, calcium-binding site/
GalT_2	ferritin 2	2.16463e-116	94.2%	Ferritin/DPS protein domain
GalT_202	TUBB4A isoform	2.00499e-65	98.8%	Beta tubulin/
GalT_2021	EF-hand domain-containing family member C2-like	1.43257e-80	86.4%
GalT_2027	hepatic lectin-like	0.00110078	47.8%
GalT_2044	calmodulin	2.4525e-43	100%	EF-Hand 1, calcium-binding site/
GalT_2050	basic N23	8.51358e-12	59.7%
GalT_2053	complement C1q 3	4.84445e-42	69.9%
GalT_207	glyceraldehyde-3-phosphate dehydrogenase [Littorina littorea]	5e-143	0.76	glyceraldehyde-3-phosphate dehydrogenase, NAD binding
GalT_2070	c-type f lectin domain family 4	3.04574e-18	54.4%
GalT_208	tubulin beta-4B chain	0	99%	Beta tubulin/
GalT_2081	monocarboxylate transporter 14-like	1.19632e-18	85.2%
GalT_2093	Cathepsin Z	7.23764e-26	79.6%	Cysteine peptidase, asparagine active site/
GalT_2128	superoxide dismutase	5.25767e-30	93.5%
GalT_2153	A disintegrin and Metalloproteinase with thrombospondin motifs 1	9.98358e-07	80.1%	Metallopeptidase, catalytic domain/
GalT_2167	SPARC-like isoform X2	6.93374e-45	76.1%	EF-Hand 1, calcium-binding site/
GalT_2176	C1q domain containing 1q33	2.58448e-88	69.8%	C1q domain/
GalT_2234	V-type proton ATPase 16 kDa proteolipid subunit	1.5e-51	0.784	V-ATPase proteolipid subunit C, eukaryotic/
GalT_2236	carbonic anhydrase 2-like isoform X3	2.76102e-37	74.1%	Alpha carbonic anhydrase/
GalT_2263	protocadherin Fat 4	9e-06	0.36	von Willebrand factor, type A/
GalT_2268	Runt-related transcription factor 1	2.51383e-35	54.4%
GalT_2276	collagen -	1.18905e-52	72.4%	von Willebrand factor, type A/
GalT_2313	shell fibrous prismatic perlucin 1	2.08513e-40	76.6%
GalT_2329	mucin-16-like [Crassostrea virginica]	1e-13	0.38
GalT_2336	calmodulin 3	1.45676e-25	79.2%	EF-Hand 1, calcium-binding site/
GalT_2337	macrophage mannose receptor 1-like	1.98613e-15	55.1%
GalT_2369	c-type f lectin domain family 4	9.83667e-32	59.8%
GalT_2390	ankyrin-1-like isoform X6	2.23982e-13	58.7%	Ankyrin repeat/
GalT_241	arylsulfatase B-like	9.21358e-32	62.2%	Alkaline-phosphatase-like, core domain/
GalT_2411	heat shock	9.92035e-57	93.4%	Heat shock protein 70 family/
GalT_2429	cyclophilin-type peptidyl-prolyl cis-trans	8.6e-18	0.7029	Cyclophilin-like domain/
GalT_2440	collagen alpha-1(I) chain-like isoform X3	4.72797e-11	57%
GalT_245	tubulin beta chain-like	0	99.2%	Beta tubulin/
GalT_2487	EF-hand calcium-binding domain-containing 12-like	7.33384e-30	67.2%
GalT_250	copper zinc superoxide dismutase	1.22912e-21	63%
GalT_251	copper zinc superoxide dismutase	6.68588e-18	78.7%
GalT_2536	fructose-bisphosphate aldolase	1.26249e-76	88.2%	Aldolase-type TIM barrel/
GalT_2540	amine oxidase [copper-containing]	2.87358e-19	61%
GalT_2562	smoothened homolog	3.11027e-13	62.5%
GalT_257	myophilin isoform X1	5.54146e-68	73.8%	Calponin homology domain/
GalT_2578	Sushi repeat-containing SRPX2	3.85302e-38	48.8%
GalT_26	tubulin beta-4B chain	0	100%	Beta tubulin/
GalT_2635	serine protease	1.4e-37	0.7165	Peptidase S28/
GalT_2647	vitellogenin-like protein, partial	5.933e-22	73%
GalT_2705	tyrosinase-like protein 1 [Mizuhopecten yessoensis]	8e-14	0.45	Tyrosinase copper-binding domain/
GalT_2734	monocarboxylate transporter 14-like	1.31995e-22	76.4%	Major facilitator superfamily domain/
GalT_2828	E3 ubiquitin- ligase TRIM56-like	1.46134e-16	72%
GalT_2832	aggrecan x1 core	1.47328e-22	65.2%
GalT_312	C1q domain containing 1q71	1.19257e-27	65.3%	C1q domain/
GalT_314	vitellogenin	4.41743e-48	57.6%	von Willebrand factor, type D domain/
GalT_317	C1q domain containing 1q64	5.67061e-87	63.7%	C1q domain/
GalT_322	cold shock domain-containing E1-like	2.53054e-145	81.3%	Cold shock domain/
GalT_372	EF-hand domain-containing 1	1.75573e-39	83.9%
GalT_379	filamin -1	0	86.8%	Filamin/ABP280 repeat
GalT_386	collagen alpha-1(I) chain-like	1.16737e-26	63.1%	Fibrillar collagen, C-terminal/
GalT_389	Ependymin-related 1	5.52386e-13	52%	Ependymin/
GalT_390	mammalian ependymin-related 1-like	6.35815e-14	51.9%	Ependymin/
GalT_391	Ependymin-related 1	2.73433e-14	53.1%	Ependymin/
GalT_399	tubulin beta	7.67361e-77	100%	Beta tubulin/
GalT_400	tubulin beta	1.20398e-60	100%	Tubulin/FtsZ, C-terminal
GalT_401	tubulin beta chain	6.9018e-84	100%	Beta tubulin/
GalT_405	tubulin beta-4B chain-like	7.51014e-151	99%	Beta tubulin/
GalT_417	egg surface -1	0	53.3%	Immunoglobulin I-set/
GalT_424	retrograde of 51 kDa-like isoform X2	1.13734e-113	76.6%	Intermediate filament protein/
GalT_428	Nacrein-like 2	3.02576e-20	60.9%	Fibrillar collagen, C-terminal/
GalT_437	shell nacre collagen-like protein 1, partial	1.09589e-87	67.6%
GalT_448	Peptidyl-prolyl cis-trans isomerase	1.5e-85	0.8755	Cyclophilin-like domain/
GalT_46	PREDICTED: protein PIF-like [Crassostrea gigas]	4e-71	0.32	Chitin binding domain/
GalT_47	PREDICTED: protein PIF-like [Crassostrea gigas]	5e-75	0.32	Chitin binding domain/
GalT_476	shell fibrous prismatic perlucin 1	1.34556e-60	64.1%	C-type lectin fold/
GalT_49	phosphoenolpyruvate carboxykinase	2e-100	0.8
GalT_494	heat shock 70	0	93.5%	Heat shock protein 70 family/
GalT_508	paired box Pax-8-like isoform X4	2.56585e-26	61.4%
GalT_534	egg surface protein-1 [Mytilus edulis]	0	0.99	Immunoglobulin subtype/
GalT_535	collagen alpha-1(XII) chain-like isoform X1	4.06295e-59	59.4%	von Willebrand factor, type A/
GalT_541	C1q domain containing 1q3	0	58.71%	C1q domain/
GalT_553	acidic mammalian chitinase-like	1.20123e-15	78.9%
GalT_576	heat shock 90	2.30013e-72	98%
GalT_58	cytoplasmic beta-	3.24802e-93	97.7%	Actin family/
GalT_583	disulfide isomerase	3.91299e-92	87.1%	Disulphide isomerase/
GalT_59	actin, alpha skeletal muscle	5.9419e-40	100%	Actin family/
GalT_60	actin, alpha skeletal muscle	7.08444e-95	97.5%
GalT_606	collagen alpha-1(I) chain-like	4.04234e-25	63.5%	Collagen triple helix repeat/
GalT_626	cartilage matrix -like	4.58217e-115	68.1%	von Willebrand factor, type A/
GalT_633	Collagen alpha-5(VI) chain	2.75411e-08	62%	von Willebrand factor, type A/
GalT_647	Perlustrin	5e-26	0.55	Growth factor receptor cysteine-rich domain/
GalT_649	Acidic mammalian chitinase	1.38867e-37	64.5%	Chitin binding domain/
GalT_65	actin	1.24985e-89	97.4%	Actin family/
GalT_650	acidic mammalian chitinase	3e-122	65.4%	Chitin binding domain/
GalT_662	byssal -3	2.0518e-32	50.5%
GalT_690	78 kDa glucose-regulated	6.00016e-100	92.2%	Domain of unknown function DUF1542/
GalT_705	A disintegrin and metalloproteinase with thrombospondin motifs 1 [Crassostrea gigas]	5e-58	0.5	Metallopeptidase, catalytic domain/
GalT_710	zinc metalloproteinase nas-13-like	1.5803e-54	56.7%	ShKT domain/
GalT_718	EF-hand domain-containing 1	1.63952e-132	87.3%	Domain of unknown function DUF1126/
GalT_723	CREB-binding isoform X4	5.90218e-51	91.4%	Zinc finger, TAZ-type/
GalT_729	putative C1q domain containing protein MgC1q81 [Mytilus galloprovincialis]	1e-25	0.55	C1q domain/
GalT_730	heat shock 70 kDa 12A-like	4.6803e-95	79.5%
GalT_774	shell fibrous prismatic perlucin 1	5.07634e-45	61.5%	C-type lectin fold/
GalT_775	nacre apextrin 1	4.0506e-109	72.7%	Apextrin, C-terminal domain/
GalT_777	Low-density lipo receptor-related 4	1.62392e-12	58.8%	Six-bladed beta-propeller, TolB-like/
GalT_78	heat shock 90	0	94.9%	Heat shock protein Hsp90 family/
GalT_793	C1q domain containing 1q23	3.6074e-100	68.8%	C1q domain/
GalT_810	peptidyl-prolyl cis-trans isomerase B-like	9.1e-124	0.711	Cyclophilin-like domain/
GalT_813	paraplegin-like isoform X1	9.80597e-22	86%	ATPase, AAA-type, core/
GalT_814	actin, partial	1.985e-55	100%	Actin family/
GalT_815	beta-actin, partial	1.73796e-41	85.9%	Actin family/
GalT_816	ACT2_NAEFO ame: Full=Actin-2 ame: Full=Actin II	4.25418e-36	85.3%	Actin family/
GalT_817	calponin -1	1.84224e-50	84.5%	Calponin repeat/
GalT_829	Paired box Pax-2-A	2.77625e-83	83.7%
GalT_875	procollagen-proline dioxygenase beta subunit	3.75308e-68	79.3%	Thioredoxin-like fold/
GalT_881	neurogenic locus notch homolog 1-like	3e-26	0.38	Chitin binding domain/
GalT_885	Collagen alpha-1(XII) chain	1.28847e-138	66.1%	von Willebrand factor, type A/
GalT_909	hemicentin-1-like isoform X1	6e-39	0.52	Immunoglobulin subtype/
GalT_91	arginine kinase	0	81.7%	phosphagen_kinase_superfamily
GalT_910	vitellogenin	1.00254e-08	61.29%
GalT_920	mucin-17 isoform X10	1.25434e-36	68%	von Willebrand factor, type D domain/
GalT_921	gelsolin 2	8.38781e-63	70.4%	ADF-H/Gelsolin-like domain
GalT_935	calmodulin	3e-58	0.71
GalT_936	calmodulin 3b (phosphorylase delta)	2.299e-91	94.4%	EF-Hand 1, calcium-binding site/
GalT_942	gelsolin 2	5.00839e-21	80.7%
GalT_944	Dermatopontin-like	3e-13	0.48	dermatopontin
GalT_953	eyegone isoform	9.44961e-14	92%	Homeobox domain-like/
GalT_954	nucleoside diphosphate kinase	3.9e-37	0.818	Nucleoside diphosphate kinase/
GalT_971	collagen alpha-1(IV) chain-like	2.32358e-09	56.3%	Collagen IV, non-collagenous/
GalT_977	casein kinase II subunit beta isoform X1	1.60984e-71	98.6%	Casein kinase II, regulatory subunit/
GalT_978	acetylcholine receptor subunit alpha-like 1	4.13637e-07	67.4%
GalT_99	heat shock 70	0	96.6%	Heat shock protein 70 family/
GalT_990	beta actin isolate	7.92332e-42	100%	Actin family/
TroV_100	collagen -2	3.96574e-119	75.1%	von Willebrand factor, type A/
TroV_1014	helicase with zinc finger domain 2-like	7.94021e-51	83.3%	Ependymin/
TroV_1047	Ankyrin-2	2.71375e-37	69.4%
TroV_105	collagen - partial	1.08483e-80	68.1%	von Willebrand factor, type A/
TroV_1054	Frizzled-4	7.3513e-08	61.7%	Frizzled domain/
TroV_106	collagen - partial	9.63482e-82	67.5%	von Willebrand factor, type A/
TroV_1060	cold shock domain-containing E1-like	3.13162e-139	73.3%
TroV_107	collagen alpha-6(VI) chain-like	8.49052e-15	62.6%	von Willebrand factor, type A/
TroV_1070	heat shock 70	2.19922e-21	76%
TroV_1085	Cathepsin L	6.4862e-164	83.6%	Cysteine peptidase, asparagine active site/
TroV_109	PREDICTED: EF-hand domain-containing protein 1 [Crassostrea gigas]	2e-114	0.75	von Willebrand factor, type A/
TroV_1093	collagen alpha-1(IV) chain	3.09338e-12	59%	Collagen triple helix repeat/
TroV_1096	Adhesive plaque matrix	6.24417e-26	55.1%	VWFC domain/
TroV_11	heat shock 70	0	97.3%	Heat shock protein 70 family/
TroV_110	actin, adductor muscle	0	99.4%	Actin/actin-like conserved site
TroV_112	collagen - partial	1.88758e-74	62.9%	von Willebrand factor, type A/
TroV_113	collagen - partial	4.95468e-42	65.9%	von Willebrand factor, type A/
TroV_114	collagen - partial	6.24686e-27	65.6%	von Willebrand factor, type A/
TroV_1143	Shell matrix	0	62.4%	Concanavalin A-like lectin/glucanase domain
TroV_1155	complement C1q tumor necrosis factor-related 3-like	5.00522e-28	55.8%	C1q domain/
TroV_116	collagen - partial	3.01446e-78	61.6%	von Willebrand factor, type A/
TroV_1178	tubulin beta-4B chain-like	1.22241e-43	96.4%	Tubulin/FtsZ, GTPase domain
TroV_1192	serine protease inhibitor dipetalogastin-like [Crassostrea gigas]	1.23549e-19	53.3333333333333%
TroV_1196	copper zinc superoxide dismutase	6.83111e-28	71.2%	Reverse transcriptase domain/
TroV_1200	perlucin isoform X1	6.98133e-35	68.6%	C-type lectin fold/
TroV_1203	peptidyl prolyl cis trans isomerase	4.87609e-88	88.4%	Cyclophilin-like domain/
TroV_1205	Zonadhesin	6e-38	0.44	Kazal domain/
TroV_1214	Cartilage matrix	1.09912e-85	68.3%	VWFC domain/
TroV_1217	PDZ domain-containing -1	8e-53	0.93
TroV_123	glyceraldehyde-3-phosphate dehydrogenase [Mytilus galloprovincialis]	0.0	0.99	glyceraldehyde-3-phosphate dehydrogenase, NAD binding
TroV_1235	78 kDa glucose-regulated -like	3.40459e-24	81.9%	Heat shock protein 70 family/
TroV_1262	C1q domain containing 1q23	8.98644e-63	70.4%	Tumour necrosis factor-like domain/
TroV_1263	E3 ubiquitin- ligase TRIM33	3.41046e-09	49%
TroV_127	perlucin-like isoform X2	3.2544e-49	60.1%	C-type lectin fold/
TroV_1274	MACPF domain-containing 8	1.75412e-28	69.4%	Apextrin, C-terminal domain/
TroV_1280	SK-rich - partial	1.15762e-55	81%
TroV_1296	epidermal cell surface receptor	1.32681e-63	64%
TroV_1324	phosphoenolpyruvate carboxykinase [GTP]-like [Crassostrea gigas]	4e-72	0.71
TroV_1326	von Willebrand factor type EGF and pentraxin domain-containing 1 isoform X1	2e-08	0.38	Sushi/SCR
TroV_1328	copper zinc superoxide dismutase	7.83467e-43	58.4%
TroV_1329	calponin 1	1.07845e-113	78%	Calponin homology domain/
TroV_1346	copper zinc superoxide dismutase	3.46699e-22	77.6%
TroV_1363	collagen alpha-1(XII) chain-like	1.16722e-22	55.1%	von Willebrand factor, type A/
TroV_1364	collagen alpha-1(XII) chain-like	1.63602e-09	53.7%	von Willebrand factor, type A/
TroV_1372	nacre apextrin 1	2.45461e-48	65.7%
TroV_1380	basic N23	2.66084e-36	65.4%
TroV_1415	cysteine-rich motor neuron 1	1.71899e-17	51.7%
TroV_1434	C1q domain containing 1q55	2.34536e-44	64.4%	C1q domain/
TroV_1436	PREDICTED: hemagglutinin/amebocyte aggregation factor-like [Aplysia californica]	1.24823e-26	63.6%
TroV_1470	MACPF domain-containing 4	5.44134e-97	63.5%	Apextrin, C-terminal domain/
TroV_1479	Cartilage matrix	2.45e-49	67.1%	VWFC domain/
TroV_1490	vitellogenin	2.74354e-13	64.3%	von Willebrand factor, type D domain/
TroV_1501	sodium potassium-transporting ATPase subunit alpha-like	0	92.1%	Cation-transporting P-type ATPase, N-terminal/
TroV_1504	MYSP_MYTGA ame: Full=Paramyosin	8.61764e-49	96.4%
TroV_151	serine protease inhibitor-1L	3.26923e-17	70.5128205128205%
TroV_1526	Collagen alpha-4(VI) chain	4.14876e-51	68%	VWFC domain/
TroV_1549	PREDICTED: putative uncharacterized oxidoreductase YDR541C [Crassostrea gigas]	1e-95	0.85	NAD(P)-binding domain/
TroV_157	fibril-forming collagen alpha chain-like	9.58284e-62	58%	Collagen triple helix repeat/
TroV_1573	C1q domain containing 1q93	4.29529e-25	71.5%	C1q domain/
TroV_158	mytichitin 5	0	69%	Chitin binding domain/
TroV_1597	Collagen alpha-4(VI) chain	1.20349e-66	56.5%
TroV_16	small heat shock protein 24.1 [Mytilus galloprovincialis]	2.412e-84	60.2%	Alpha crystallin/Hsp20 domain
TroV_1610	sodium/potassium-transporting ATPase subunit alpha-like [Mizuhopecten yessoensis]	1e-137	0.92	Cation-transporting P-type ATPase, C-terminal/
TroV_1625	Collagen alpha-3(VI) chain	7.77058e-78	61.2%	ShKT domain/
TroV_163	calreticulin	2.83967e-174	89.8203592814371%	Calreticulin/calnexin
TroV_1631	heat shock 90	3.3281e-20	96.2%
TroV_1636	galectin 2	5.14588e-64	76.2%	Concanavalin A-like lectin/glucanase domain
TroV_1642	retrograde of 51 kDa-like isoform X4	9.443e-32	74%
TroV_1670	Cathepsin L	1.09689e-43	79.1%	Cysteine peptidase, histidine active site/
TroV_1703	Chitin synthase 8	7.35627e-54	78.3%
TroV_1710	zinc metalloproteinase nas-14-like [Mizuhopecten yessoensis]	1e-46	0.44	ShKT domain/
TroV_1715	myophilin isoform X1	1.83422e-61	70%	Calponin homology domain/
TroV_1725	Venom prothrombin activator oscutarin-C non-catalytic subunit	2.28968e-21	68.8%	Chitin binding domain/
TroV_1732	zinc metalloproteinase nas-6-like	6.66748e-69	81%	Metallopeptidase, catalytic domain/
TroV_1738	transgelin -3	2.63498e-89	79.8%	Calponin homology domain/
TroV_1740	MYSP_MYTGA ame: Full=Paramyosin	3.18691e-86	89.2%
TroV_1741	filamin-C-like isoform X1	0	82.6%	Filamin/ABP280 repeat
TroV_1749	Cartilage matrix	8.80117e-89	56.5%	VWFC domain/
TroV_1750	cathepsin L1-like	3.18871e-92	78.9%	Cysteine peptidase, cysteine active site/
TroV_1757	Perlustrin	5e-25	0.55	Growth factor receptor cysteine-rich domain/
TroV_1770	Collagen alpha-3(VI) chain	8.69672e-33	70.7%
TroV_1773	prolow-density lipo receptor-related 1	8.22483e-39	48.4%	Six-bladed beta-propeller, TolB-like/
TroV_1777	cold shock domain-containing E1-like	1.86949e-51	78.2%
TroV_1787	collagen alpha-1(XII) chain-like	5.75242e-16	52.9%
TroV_18	small heat shock protein 24.1 [Mytilus galloprovincialis]	6.53089e-44	63.1%	Alpha crystallin/Hsp20 domain
TroV_1814	goose-type lysozyme 2	2.47476e-61	80.7%	Lysozyme-like domain/
TroV_1846	Collagen alpha-4(VI) chain	4.73845e-26	64.5%	ShKT domain/
TroV_1863	C1q domain containing 1q37	1.50026e-55	60.3%	C1q domain/
TroV_191	mucin-4- partial	1.25499e-34	64.1%	EGF-like calcium-binding domain/
TroV_1919	filamin -1	3.64099e-71	76.4%	Filamin/ABP280 repeat
TroV_1927	MAM and LDL-receptor class A domain-containing 1-like	2e-15	0.41	Concanavalin A-like lectin/glucanase domain
TroV_1965	cadherin-87A-like isoform X1	2e-64	0.72	Cadherin/
TroV_2004	heat shock 70 kDa 12A-like	7.45564e-13	55.6%
TroV_2027	zonadhesin-like isoform X2 [Mizuhopecten yessoensis]	2e-23	0.54	Trypsin Inhibitor-like, cysteine rich domain/
TroV_2040	Follistatin-related 3	1.5154e-45	66.8%	Insulin-like growth factor-binding protein, IGFBP/
TroV_2054	transforming growth factor-beta-induced ig-h3-like	6.44388e-49	65.2%	FAS1 domain/
TroV_2058	small heat shock protein 24.1 [Mytilus galloprovincialis]	5.50893e-51	59%	Alpha crystallin/Hsp20 domain
TroV_2076	fructose-bisphosphate aldolase	5.1787e-42	86.7%	Aldolase-type TIM barrel/
TroV_2093	Tyrosine- phosphatase Lar	9.00008e-80	100%
TroV_2100	cAMP-responsive element-binding -like 2	3.20873e-24	78.3%	Basic-leucine zipper domain/
TroV_212	collagen alpha-1(I) chain-like	1.41951e-42	60.9%	Collagen triple helix repeat/
TroV_2122	annexin B9-like isoform X1	6.35333e-58	72.6%	Annexin/
TroV_2124	tyrosinase-like protein-1, partial [Mytilus coruscus]	1e-35	0.59
TroV_2127	turripeptide -like	1.63579e-09	64.4%	Kazal domain/
TroV_214	tubulin beta 2	1.26008e-131	99.9%	Beta tubulin/
TroV_215	tubulin beta 2	5.14346e-87	97.4%	Beta tubulin/
TroV_2184	complement C1q tumor necrosis factor-related 3-like	1.21785e-24	60.4%	C1q domain/
TroV_2186	hemicentin-1-like isoform X1	6e-41	0.55	Immunoglobulin subtype/
TroV_2190	Cartilage matrix	2.05773e-33	80.5%
TroV_2203	heat shock 70	0	84.3%	Heat shock protein 70 family/
TroV_2214	Cartilage matrix	3.90358e-41	59.1%
TroV_2221	Collagen alpha chain	9.5648e-08	59.33%	Collagen triple helix repeat/
TroV_2224	low-density lipo receptor-related 4-like	2.50642e-32	75%	LDLR class B repeat/
TroV_2229	heat shock 70 kDa 12A-like	3.53774e-33	65.9%
TroV_2232	chitin synthase	1.46055e-47	70.9%
TroV_2258	disulfide-isomerase A5	2.23578e-36	79.4%	Thioredoxin domain/
TroV_2280	78 kDa glucose-regulated	9.69134e-136	93.2%	Heat shock protein 70 family/
TroV_229	PREDICTED: protein PIF-like [Crassostrea gigas]	4e-42	0.32	Chitin binding domain/
TroV_2297	IP-rich -1	1.54751e-35	86%
TroV_2300	heat shock 70 kDa 12A-like	1.32718e-24	62.6%
TroV_2303	heat shock 70 kDa 12A-like	8.02355e-75	70.2%
TroV_2323	acidic mammalian chitinase-like	3.14762e-55	75.6%	Glycoside hydrolase family 18, catalytic domain/
TroV_2381	C1q domain containing 1q93	6.18522e-52	67.4%	C1q domain/
TroV_2401	Sodium-coupled monocarboxylate transporter 1	3.28235e-58	69%	Sodium/solute symporter
TroV_2404	Collagen alpha-3(VI) chain	1.83829e-15	61.2%
TroV_2417	egg surface -1	4.35109e-98	48.5%	Immunoglobulin subtype/
TroV_242	tubulin beta chain-like	0	99.2%	Beta tubulin/
TroV_243	tubulin beta 2	1.64323e-95	99.8%	Beta tubulin/
TroV_2459	glucose-regulated 94	3.19184e-81	86.5497076023391%	Heat shock protein Hsp90 family/
TroV_2475	heat shock 70 kDa 12A-like isoform X1	6.18006e-20	71.7%
TroV_2479	E3 ubiquitin- ligase TRIM33	5.92684e-30	54.1%	B-box-type zinc finger/
TroV_249	collagen alpha-1(XII) chain-like	0	55%	von Willebrand factor, type A/
TroV_2496	von Willebrand factor A domain-containing 5A-like	7.87197e-10	62.2%
TroV_2510	thymosin beta isoform X2	5.48304e-26	67.5%	Beta-thymosin/
TroV_2529	Collagen alpha-4(VI) chain	6.88208e-22	75.1%
TroV_2566	cysteine-rich motor neuron 1	1.20069e-06	39.9%	VWFC domain/
TroV_259	disulfide isomerase	7.14171e-73	88%	Disulphide isomerase/
TroV_2608	C-type lectin domain family 4 member E-like	1.51747e-07	63.7%	C-type lectin fold/
TroV_2621	peroxidase	8.10106e-50	77.8%	Haem peroxidase/
TroV_2622	fructose-bisphosphate aldolase-like	1.78079e-66	73.7%
TroV_265	EF-hand domain-containing family member C2-like	1.79821e-65	67.6%
TroV_2663	PREDICTED: dentin sialophosphoprotein isoform X2 [Crassostrea gigas]	3e-19	0.59
TroV_2667	procollagen-proline dioxygenase beta subunit	2.15979e-56	77.3%
TroV_2687	matrix metalloproteinase -1	1.14921e-42	81%
TroV_2694	meprin A subunit alpha-like	1.36097e-61	55%	Concanavalin A-like lectin/glucanase domain
TroV_2761	epidermal cell surface receptor	4.42769e-41	65.8%	VWFC domain/
TroV_279	chitinase-3 1	2.0445e-59	69.8%	Chitinase insertion domain/
TroV_2793	Runt-related transcription factor 1	1.36895e-86	71.6%	Acute myeloid leukemia 1 protein (AML1)/Runt
TroV_2810	periostin-like [Crassostrea virginica]	1e-38	0.62	FAS1 domain/
TroV_2819	peroxidasin homolog isoform X1	4.0375e-09	58.8235294117647%	Immunoglobulin-like fold/
TroV_2832	heat shock 70 kDa 12A-like	1.54638e-51	63.3%
TroV_2867	hemicentin-1-like isoform X1	1e-11	0.42
TroV_2871	lysozyme	5.93574e-80	100%	Invertebrate-type lysozyme/
TroV_2892	zinc metalloproteinase nas-6-like	5.59905e-38	63.7%	Concanavalin A-like lectin/glucanase domain
TroV_2894	tubulin beta chain-like	2.04326e-15	82.3%
TroV_2939	V-type proton ATPase subunit B	3.70098e-54	83.0508474576271%	ATPase, F1/V1 complex, beta
TroV_2981	collagen chain alpha-	3.01477e-118	59.8%	von Willebrand factor, type A/
TroV_2995	filamin-C isoform X1	1.43505e-135	94%	Calponin homology domain/
TroV_300	cytoplasmic actin	0	98.5%	Actin/actin-like conserved site
TroV_3007	mucin-16 isoform X7	6e-41	0.55
TroV_3033	Cartilage matrix	1.52605e-59	75.1%	VWFC domain/
TroV_3044	Collagen alpha-4(VI) chain	1.24171e-48	84.7%
TroV_3045	cleavage and polyadenylation specificity factor subunit 6-like isoform X1	6.55676e-39	99.6%
TroV_3124	Collagen alpha-4(VI) chain	0.00493647	49.8%	von Willebrand factor, type A/
TroV_3137	procollagen-proline dioxygenase beta subunit	2.19678e-85	75.8%	Thioredoxin domain/
TroV_3208	fibrillin-2-like isoform X1	5.1304e-32	62.9629629629629%
TroV_3244	chorion peroxidase-like	3.21512e-11	70%	Haem peroxidase/
TroV_3317	complement C1q 2	3.12595e-18	56.9%	C1q domain/
TroV_3358	tolloid 1	3e-28	0.56
TroV_3360	A disintegrin and Metalloproteinase with thrombospondin motifs 9-like	7.03838e-28	65.7%	Thrombospondin type-1 (TSP1) repeat/
TroV_3378	PREDICTED: plexin-A1-like	1.53584e-07	66.7%	Plexin, cytoplasmic RasGAP domain/
TroV_3404	Collagen alpha-4(VI) chain	1.13889e-22	69.4%
TroV_3424	collagen alpha-1(I) chain-like	5.72827e-12	66%
TroV_3425	small heat shock protein 24.1 [Mytilus galloprovincialis]	1.07457e-36	76%
TroV_349	non-symbiotic hemoglobin 1-like	8.52604e-68	78.4%	Globin/
TroV_352	cathepsin D	2.62799e-70	69.5%	Aspartic peptidase domain/
TroV_368	EF-hand domain-containing family member C2-like	1.07007e-73	90.5%	Domain of unknown function DUF1126/
TroV_371	tubulin beta 2	4.14669e-85	98%	Beta tubulin/
TroV_396	monocarboxylate transporter 12-like isoform X1	6.14036e-56	79%	Major facilitator superfamily/
TroV_397	heat shock 90	0	95%	Heat shock protein Hsp90 family/
TroV_399	C1q domain containing 1q71	2.03509e-63	70.2%	C1q domain/
TroV_40	E3 ubiquitin- ligase TRIM33	2.93577e-11	51%	B-box-type zinc finger/
TroV_401	heat shock 70 kDa 12A-like [Crassostrea gigas]	1.61601e-41	65.6%
TroV_402	actin subfamily	3.38262e-72	94.4%	Actin/actin-like conserved site
TroV_403	cytoplasmic actin	3.0223e-144	100%	Actin/actin-like conserved site
TroV_404	beta actin	5.50428e-126	100%	Actin/actin-like conserved site
TroV_409	collagen chain alpha-	2.35655e-54	63.5%	von Willebrand factor, type A/
TroV_410	collagen alpha-6(VI) chain-like isoform X1	5.04763e-47	69.6%	von Willebrand factor, type A/
TroV_417	perlucin isoform X2	1.17154e-22	67.5%	C-type lectin fold/
TroV_42	filamin -1	0	91.8%	Filamin/ABP280 repeat
TroV_424	Bone morphogenetic receptor type-2	1.75733e-11	53.4%
TroV_440	calponin -1	4.84149e-10	96%
TroV_457	Collagen alpha-4(VI) chain	1.29389e-73	59.4%	von Willebrand factor, type A/
TroV_528	Cartilage matrix	8.05742e-94	60.5%
TroV_555	Adhesive plaque matrix	8.48166e-12	68%	ShKT domain/
TroV_563	beta actin	1.78992e-72	98.2%	Actin family/
TroV_573	alpha cardiac	1.29298e-06	100%
TroV_591	mucin-17 isoform X10	2e-125	0.39	Cystine knot, C-terminal/
TroV_595	arginine kinase	0.0	0.95	phosphagen_kinase_superfamily
TroV_609	metalloproteinase inhibitor 3	4.05738e-50	48.7%	Protease inhibitor I35 (TIMP)/
TroV_621	E3 ubiquitin- ligase TRIM33	1.07269e-63	60.4%	B30.2/SPRY domain
TroV_630	epidermal growth factor 8	4.21046e-34	59.6%	EGF-like calcium-binding domain/
TroV_650	actin	3.18598e-75	99%	Actin family/
TroV_651	beta actin	3.81966e-36	99.2%	Actin family/
TroV_695	Ependymin-related 1	3.6172e-16	47.5%	Ependymin/
TroV_698	peptidyl-prolyl cis-trans isomerase-like [Octopus bimaculoides]	5.49708e-122	91.8181818181818%	Cyclophilin-like domain/
TroV_718	matrix metalloproteinase-16 isoform X3	1.23634e-51	49%	Hemopexin-like domain/
TroV_739	cathepsin L1-like isoform X1	2.46965e-94	83.6%	Peptidase C1A, papain C-terminal/
TroV_742	MYSP_MYTGA ame: Full=Paramyosin	6.26693e-156	83.3%	Myosin tail/
TroV_747	C1q domain containing 1q6	1.0816e-145	87.6%	C1q domain/
TroV_75	Collagen alpha-5(VI) chain	1.83405e-34	62.2%	von Willebrand factor, type A/
TroV_750	alpha-2-macroglobulin [Pinctada fucata]	2e-60	0.63	Alpha-macroglobulin, receptor-binding/
TroV_766	carbonic anhydrase 14-like isoform X2	1.14683e-70	66.4%	Alpha carbonic anhydrase/
TroV_77	fibril-forming collagen alpha chain-like	3.67147e-29	69.2%	Collagen triple helix repeat/
TroV_771	voltage-dependent anion-selective channel 2-like	2.35256e-101	84.4%	Eukaryotic porin/Tom40
TroV_784	pulmonary surfactant-associated D	4.49829e-47	73.56%
TroV_805	retrograde of 51 kDa-like isoform X4	9.52555e-21	73%	Intermediate filament protein/
TroV_816	Collagen alpha-4(VI) chain	9.22446e-37	68.4%	VWFC domain/
TroV_818	GAL-rich protein, partial [Mytilus coruscus]	1e-20	0.95
TroV_852	gelsolin 2	2.29569e-11	62.7%	ADF-H/Gelsolin-like domain
TroV_857	Collagen alpha-4(VI) chain	0	56.3%	VWFC domain/
TroV_953	nucleoside diphosphate kinase	6.24592e-92	87.5739644970414%	Nucleoside diphosphate kinase/
TroV_955	Signal CUB and EGF-like domain-containing 3	9.23756e-32	53.6%	Growth factor receptor cysteine-rich domain/
TroV_973	putative C-type lectin	3.2072e-63	56.5%	C-type lectin fold/
TroV_986	Collagen alpha-4(VI) chain	2.27326e-59	69.4%
TroV_997	Collagen alpha-3(VI) chain	8.23163e-14	78.4%
TroV_999	phosphoenolpyruvate carboxykinase [GTP]-like [Crassostrea gigas]	1e-125	0.8

## Sheet: EduN.fasta
>EduN_2
CCAAGAACATGATGGCTGCTTGTGATCCACGTCACGGTAGATATCTCACAGTAGCTGCCATGTTCCGTGGTCGTATGTCAATGAAGGAAGTAGATGAACAGATGTTGAACGTACAGAACAAGAACAGCAGCTACTTTGTTGAATGGATTCCCAACAACGTCAAGACAGCAGTCTGTGACATTCCACCAAGAGGTCTGAAAATGTCTGCTACATTTATTGGAAACAGCACAGCCATCCAAGAATTATTCAAACGTATTTCGGAACAATTTACTGCTATGTTCAGACGAAAGGCTTTCTTGCATTGGTATACTGGTGAAGGTATGGATGAGATGGAATTCACAGAAGCTGAATCCAACATGAATGACTTGGTCTCAGAATACCAACAATACCAGGATGCAA…
>EduN_3
CATGCGATCCACGTCACGGCAGATACCTCACAGTCAGTGCACTCTTCAGAGGAAGAATGTCAATGAAAGAGGTTGATGAACAAATGTTGAATGTACAAAACAAGAACAGCAGTTACTTCGTTGAATGGATTCCAAACAACGTCAAGACAGCAGTTTGTGATATTCCACCACGTGGTCTTAAGATGTCTGCCACATTCGTCGGAAACACAACAGCCATTCAGGAATTATTTAAGCGTGTCTCAGAACAGTTTACTGCCATGTTCCGTCGAAAGGCTTTCTTGCATTGGTACACTGGTGAGGGTATGGACGAGATGGAGTTCACAGAAGCAGAATCCAACATGAACGACTTGGTATCCGAATATCAGCAATACCAAGATGCAACAGCGGAAGAGGAAGGAG…
>EduN_11
TGGCAGATACCTCACAGTTGCTTGTATGTTCCGTGGACGTATGTCAATGAAGGAGGTTGATGAACAAATGTTGAACGTACAGAACAAGAACAGCAGCTACTTCGTTGAATGGATCCCAAACAACGTCAAGACAGCCGTCTGTGACATTCCACCACGTGGTCTTAAGATGTCTGCCACATTTATTGGTAACAGCACAGCCATCCAGGAACTCTTCAAGAGAATCTCAGAACAATTCACCGCTATGTTCAGGCGTAAAGCTTTCTTGCATTGGTACACTGGTGAGGGTATGGACGAGATGGAATTCACAGAAGCCGAATCCAACATGAACGATTTGGTCTCAGAATACCAACAATACCAGGATGCAACAGCCGAAGAGGAAGGAGAATTCGAAGAGGAAGA…
>EduN_12
ATGCGATCCACGTCACGGTAGATACCTCACAGTCAGTGCCCTCTTCAGAGGAAGAATGTCAATGAAAGAGGTTGATGAACAAATGTTGAATGTACAAAACAAGAACAGCAGTTACTTCGTTGAATGGATTCCAAACAACGTCAAGACAGCAGTTTGTGATATTCCACCACGTGGTCTTAAGATGTCTGCCACATTCGTTGGAAACACAACAGCCATCCAGGAATTATTCAAGCGTGTCTCAGAACAGTTTACTGCCATGTTCCGTCGTAAGGCTTTCTTGCATTGGTACACTGGTGAGGGTATGGACGAAATGGAGTTCACAGAAGCAGAATCCAACATGAATGACTTGGTATCCGAATATCAGCAATACCAAGATGCAACAGCGGAAGAGGAAGGAGA…
>EduN_23
CGTGATTGGGTACGGGCACGGGCTGGGCGAGGCTGGCTCTTCTTTCGGGGGAGAGTTCGGTCGAGCTCGGACCGCTGTCTTAACCGTCGCGTGGACTGCCTCAGCTGTGCTGCGGCTCTCGCGGTCGTTAGCTTCGTCCGGCGACTAACAGCCAACTTAGAACTGGTACGGACCAGGGGAATCCGACTGTCTAATTAAAACAAAAGCATTGCGATGGCCGTCACCCGGTGTTGACGCAATGTGATTTCTGCCCACGTGCTCTGAATGTCAAAGTGAAGAAATTCAATCAAGCGCGGGTAAACGGACAGTTTTCTTTTATTTTTTAAATTATGCTTAAAAGCAATATTTGTCCTTTTTAATTACTGATAGAAAGCACAGCATCTGTATTTATACTGTATT…
>EduN_24
ATTAAACCCACAGTTCTTTAAGTATTTATGCATGACTTGATTTTTCGTTATAAAATATGAGCTTTGATGTAGTTCACAATCAAATTTCCTATATAGTAAAAAAAAATATTACATATTGAGAAAGACTTAAACATATAAACAATTAAAAATACAATTTAATTTTATAAAATAAAATATTGCACACATTCACTATTTCTCTCTCCCTCACAAACACATTTGGACGGAATTGAAAGGGAAACCTACATACAATTATCACATCACAATATCTGCAATGTAATCCACATTATCAAGTTGCCATGATGGAATTTTAAACAAAATAAATACTTGCCATGATTTTTACAAATTTATACATTAATGGTGTCTCAGAAAATCTTCCATTACTTTTTATTATCTGTGCCA…
>EduN_29
TAGGAGGGCCGCCGCGGTGTGCGTCGAAGTCTGGGGCGTGAGCCTGGATGGAGCCGCCGCGGGTGCAGATCTTGGTGGTAGTAGCAAATATTCAAACGAGAACTTTGAAGACTGAAGGGGAGAAGGGTTCCATGTGAACAGCAGTTGAACATGGGTCAGTCGGTCCTAAGATATAGGGAAACTCCGTTCCGAAGCGGGGCTAATTTTATTATATCTACTGACTTTTACTAAAAAGCCTGTATT
>EduN_34
GTGTAGTATGTTAAATTTATGGCAATGTTGAATCGATCTTCTAGATTACTTCCTATGTCTGATAATAAACGATTAGCTAATGAGAATCCATGCTCCTCCCAATTATAATCTTGTGCTCTGAATGTAGGTATAGAGTCAATATTGTCACGTTTAGTCAAAATACCTGATAGCAAAACTCGGGATCCTCACATATTTTAACACTTCTACTCTCGGTGACGGGATCGATGAACTTATTAATTCAACACTTTGATTTTCTATTGATTCAAATCTTTTTAATCTTTCTTCCTCCGTTGGATCATCGCTGTCGTCTTCGTTTAATTTTTTCATTCTTTCCATCAAAACTTCTATTTTTACTTCTGGTTCATTTCCCTGTGTGTCACTATCGGAATCGTCGCTCAT…
>EduN_51
ACGATGTGTGTGTCTTGGAAGAACAGTGTGTGTGCAATACATCTCTTGGTGTTAAGGAGAATGGTGAATCATGGTCTAATCCTGAAAATAAATGTGAACAGTGTGAATGTGCGGACTCTCAGATCAAATGTTACAGAAAATGCGAGGAAATCACATCATGTCTACCTGGCGAGGTCATTGTTCCAATCAGTGATTGCTGTTCAAGATGTGAAAAACCTAAAGATACATGTCAACTATACACAGAATCTAAACCACTGATAAGAGATGGCTGTGTATCTGTTGGAAATGTGACATATAACTATTGTTCTGGAGGATGTGGAGATAGCGTTAATAAACCAATGTTGCTGCCTGAAGGAATAGAGTATGTAGAAGCAATGATTAAAGATTGTTCATGCTGTA…
>EduN_58
TGCCGAAGCAACTAGCCCTCCTGAAAATGGATGGCGCTAAAGCGCCCCACTTATACCCAACCGTTGGGGCAGAGCAGACTCTTTGAAGTCCTGAAGCCCCAACGAGTAGGAAGGTCGCATGGGTGGCGCGGAAGGCTCTGGGTGTGAACCTGGCTGGAGCCGCCCATGGTGCAGATCTTGGTGGTAGTAGCAAATACTCCAGAGAGGCCCTGGAGGACCGATGTGGAGAAGGGTTTCGTGTGAACAGCCGTTGAACACGAGTCAGTCGATCCTAAGGCTT
>EduN_63
GGTTGCTACCCTCTTAGCCATTTTCTCACAATTTTCATCAGAAATGGCTGCCAACAACGAAAGATCTTTCATCATGGTTAAACCTGATGGTGTTCAAAGAGGGTTAACTGGCGAAATCATCAAAAGATTTAACAATAGAGGCTATAAACTGGTTGCATGTAAATTAGTTCAGCCATCCAAAGAATTTATGCAGAAGCACTATGCTGATTTATCTAGCAAACCTTTCTTCAATGGGTTGGTAGAATATATGTCCTCTTCTGGACCAGTTTGTGCTTGTGTATTTGAAGGCAAAGATGTTGTGAAAACTGGACGTAAAATGTTGGGTGAAACAAATCCATTAGCCTCTGCTCCAGGAACAATTCGTGGAGATTATTGTGTTGATCTTGGAAGAAATATATG…
>EduN_69
CACTTGTCTATTACTGGAACCTTTGCTGAAATGATGCCGTCTATTCCCTCACATTGGACTTGTACAGTGGTGAATCCTCCAATGTTACCAGTACAGCATGAACAATCTTTAATCATTGCTTCTACATACTCTATTCCTTCAGGCAGCAACATTGGTTTATTAACGCTATCTCCACATCCTCCAGAACAATAGTTATATGTCACATTTCCAACAGATACACAGCCATCTCTTATCAGTGGTTTAGATTCTGTGTATAGTTGACATGTATCTTTAGGTTTTTCACATCTTGAACAGCAATCACTGATTGGAACAATGACCTCACCAGGTAGACATGATGTGATTTCCTCGCATTTTCTGTAACATTTGATCTGAGAGTCCGCACATTCACACTGTTCACAT…
>EduN_79
TTTTTTTTGTAGATTCTTGAGAAACAGATGAGAACGAATATTTTAATGTCGTTGGGATTGTCCTGGTGTACGTGGTCCGTGGTCTGTAGTCCAGTGCAGGTTACATTATTGTCAGTGCGTCCTTGATTGATAGTGGGATACAGTCGTAAACGTTAATCTCTTTCAAGCTGCCATCCAAGAAACCTACTGAGGTATTTCTAATTGTTGGACGTCCAAAAACCAAGCCGGTCTGTCTTCGCTGTATCCAACCTGACAAAGGTACAGATTGCTCATTGCTGTCGGCCTTCAATGCAAAATTGTCACCATCATATGCAAATGTGATAGAAATGTATCCTTTGTAGCCACTTGAGGAAGATACTGTGCTGGAGATTGTCTTATTATATTCTGTTCCTCTATCAG…
>EduN_88
AATAGTCATCATCAAACTAGAAGGCAGCAAAGAAGAATGGAGGTTATGGAGCAGCTCGATTAGCTGTTCCAGCTTTTACTGCTACGTTGTCAAAACATTTGACCCCACAAGTCAATCAGATAATAAAATTTGAATCAGTGAAAACCAATATTGGCGGACATTACTCTCCTAGTACTGGAACATTTACAGCACCAAGGAACGGACTTTATATGATATCTGCAACAATACGACCTAATGGATCCACTTATCTGCATTGTGAAATACAGGTTAATGGTGAGATGAAAGAAAAGACTCTTTGCAAACAGAGGATCAACAGGAACTGCAAACGCCGTTTTACTAGTTAAAAAAAGGAAACAAGGTGTTTATTCAAAAAAGATCA
>EduN_109
GTATTCTCTTCACATGTATTGTTTTTTACAATAATATACAATATACATAATTTTTTTATAAAAGTTTCAAGATCAATAAAATTTGGTCCATAGTACAAATCGTACAGAAATTGCTTTAAAATTGTATCACAGTTCTAAAAATAGCCAGGTTTTCTTCATGAGCATTCAATGAATCTTCTGAAATCTTCTAATGATATTTTGCCTTCTGGATTTGATGTGCACTGTCTAACAAGTTCATTGATAACATCATCATCTACTGGCAGTTGTAAGCTTCGGCACATTGCTCTCATGTCATCTCCACCAATATATCCTGTTCGATCTTTGTTGTATCGGAGGAACATTGTGTCAACTCTTGCCTTGTCTGTTATAGCAATCTTTTTTAGCTGAGCTCGTACTTGT…
>EduN_120
GACAACAATACAGTATGATAACAAGAAGACCAACTCCCCCTCCCTACCAGCTCCTCCTATTATTGCTGTATTTGATGATGTCTTCTCAGCTTTGGAACTACATCTGGACCCTTCATAGTTATCTCTGCATGTACAGTATTGAGAATATTGATCTGCATGACAAGTACCAAAATTACAATACGTAGGAGTCTTGTCACATATCGAAATACACTGACTTGAACTAATTGATCCTGTAGCCAGGGTATACTTCATTACAGAACCAGAACAAGCTTTACAAGTAGTTTGACCTGTTTCATCTTGGTATGTATTCACTTCACAGTCAATACACTGAGAAGAACTTGATTTTGTTCCTTTTGGACAAGGCACACAGTTGGAATTAATCTGCGTTTGACCAGCTGG…
>EduN_122
GACATACCTTGCACAGTTCCCCAAGGCTAAACTGAAGCCAGGAGCACCACTCCGTCCAAAACTTAACCCAAACCGTGTCAGAGCCTATGGTCCAGGTCTGGAGCCCAAGGGTAACCAAGTCGGAGCACCTGCCAGATTTACCGTGGAGACATTCTCTGCTGGGTCAGGATCTTTAGAGATCACAGTATTTGAATCCTAAAGGCGTAAAAGAACAGTGTGAAGTTGTTGATAACAAGGACAGAAACATGACATACTCCTGTGTATATGTACCCAGCACAGAGGGAGAATATAAGGTCATCATTAAATTTGGTGCTAAAGAAGTCAACAAGAGTCCATTCAAGGTCAAAGTTGAAGGAGCAGCTGGTGATGCCTCAAAGGTCAACTGCCTCTAGGGACCTG…
>EduN_123
TCCAAGACACACACATCGTTATAGTTGAGGAAATAACCTTCCTTACAGATACATCCCTGCTCTTCTTCAGTACACATCTCGGATTCAGGCAAATGACGATTAGCACATGTCTTCTGGCAATAAGAGTAGTTTGTCCATTGCTGATGATCTTTGTCGCATAAACAATCCTGCTGGTAACATACTGTAACATCCCTTATAGTGGTATTACATTTGTCATTTGGTTCTTGGAGTGTTTTGCTTCTGTCTGTGAGTCCTAATCCACAAGAAGCAGTGCAGTCTGACCATTCAGACCACGTAGAGTATACACATTCACAACTGCCATCATTACATGGTTGTGAATCGACTTTGTCAAGCGGTGGACATAATTCTTCATCAGAAGATTTAACATAGCTTCGTTGT…
>EduN_131
GTCGGTCCCTCCAGAGAAGAGAGAGATAATTGAGAACTTCATTGTAATTAGTGTATACGGACATATCTAAAAACAATTTACAAATTGGAAGTTCTTACAAAGACATACGTTTTCCCTAAACCCATTATGGGACCAAAAATTAGCGGGGTCCTTACCGACCTACTTCATTGTGATACTATGGATAATAACAACTGGAACGTTACAATGGACCTCGGCACAGACATCTCATGTATGTACTCACACCAAGAATACAGTAGAAGAAAAGACGGATAAGTGTACATCATTTCTTTCCTTTACGTTACTAAGGATACGGCCTAAACCGGACCTCGTCCTTCCCTGGGATGACCACGAATGATATCAATAACGCTTTAAACAAAATCATGTCAGGTTCTAAAGATC…
>EduN_132
CAGCGATAACACATTTCCGTGTGCCAACACGACGATATTTACGATGGATCTCTAGCGAGGACGTGCCCAACCACAGGAAAGCTTAGGCTTTCAGCTACACTTTATTTTTAATCATGGCGTTACCCAACATACTTTTCTTTGTTGCCCTATCAGTGGCTTACGATTCTGCAGAAATCACAAGTTTTTCATTGTCATCATTTGAAGATAAAAATGAGTTCATTATTCCAAGAGATGGAGGAGTTTACTCTGTTCGACGGGCTTGTCCCGTCGAGCAGCGGCTTCGGGCCGGGAGTTGAAGACCTTGACAAGTTTGATGTGGGATTTGGAATCCCTGGTGACAGTCTAGTCAAAGATGAATATGGTCCAGGAGAATTATTTGAGGATGTTTTGTCCTCTGGA…
>EduN_133
GAACTTCACAAGAAAAACCGGCGTACAAGTACTTTCTAGAGAGGAACACCATACAACGCCACGATGCCAGAACCAGAACAAACGATGGAAGAAGGAGAGGTTGAAACTTTTGCTTTCCAGGCAGAAATTGCCCAGCTGATGAGCTTGATCATCAATACTTTCTATTCTAACAAAGAAATCTTCTTGAGAGAATTGATCTCCAACTCGTCTGATGCTTTGGATAAGATCAGATATGAAAGTTTGACCGATCCTTCAAAACTGGACCTTGGAAAAGATCTGGAAATCAGAATCATACCAGACAAGGACAACAACACACTGACCATCATTGACACTGGTATTGGAATGACCAAAGCTGACCTGGTCAATAACCTGGGTACCATTGCCAAGTCTGGTACTAAA…
>EduN_136
GCAAAAAGTAGTGTCAAGCTCTCTGCACGTTCAGAACCCTTACGCAAGAACTAATGAGGGGTATGTAGTTGGACTGTTTAAAGAATAACATTTGTGTCCCTATCCAGAAAACCTGCATTTTTCCAATGGTAGTTCAATGTCATCCCGGTCGGGCCTACGGCGATCCCAATTAAGAAGAAGATAGAATAAGATTAGACAACTCTCCACAAGAGACCAAAAGTCACAGAAATTAACAACTTTAGGTCATCGTACGGCCTTCAACAATGATCAATTGGACCAGGGCTTTGATCAGATCATCCTGGCCCCATTATTTATCTGTTTTCGTCCTGAACATGTAGATATAATAAGATGTGATATGAGTGCCAATGAGACAACTCTCCATCCAAGTCACAATTTGTA…
>EduN_148
ACGTCACCGAAGTAAGGACACAGATATTACACTCACACAAAATGGCTGACCAACTAAATGAAGAACAAATTGCAGAATTTAAAGAGGCTTTCAGTCTGTTCGACAAAGATGGCGACGGTACCATTACCACAAAAGAACTGGGAACTGTCATGAGATCTCTCGGACAAAATCCAACAGAGGCAGAACTACAAGACATGATCAACGAAGTCGATGCTGATGGTAATGGTACGATAGATTTCCCAGAATTCCTTACTATGATGGCTACGAAAAATGAAAGACAGTGATTCCGAGGAAGAAATCAGAGAAGCATTCAGAGTATTTGATAAGGACGGCAATGGTTTTATAAGTGCAGCTGAACTTCGACATGTGATGACAAATCTAGGTAGAAA
>EduN_166
CATTGATTAGAAGATATACCAATAGATAATGAAGTTACTAGCAGTTCTATGTGTGCTGGTTGTGTCAGCATGGGCTGTTCCATTGACAGAGGAGAACTTTCTCTACAATGACATAGTTGATGCTGTCAACATGCAACAAACATCATGGAAGGCTGGTGAGAACTTCGAATTCATTCCAAAACAAGACAGACTTGCTTATGTAAAGAAACTTTGTGGTGTAATGCCAACACCAGAACACATGAAACTTCCAGTCAAAAACATCGTAGCTGCACAGGATCTTCCAGACACCTTTGATTCCAGAACACAATGGCCAAACTGTCCAACAATCAAAGAGGTCAGAGACCAAGGAGATTGTGGATCTTGCTGGGCCTTTGGTGCAGTAGAAGCTATGTCTGATAG…
>EduN_169
CCAGGAACTATGGACTCTGTCAGATCTGGTCCTTTTGGACAAATCTTTAGACCAGACAATTTTGTGTTCGGACAATCAGGTGCAGGCAACAACTGGGCTAAGGGACATTATACAGAAGGTGCCGAATTAGTAGATTCAGTATTAGATGTTGTGAGGAAAGAAGCTGAGAGTTGTGACTGTCTTCAGGGATTCCAACTTACACATTCTTTGGGAGGTGGAACTGGATCTGGTATGGGAACCCTCTTGATCTCCAAAATCAGAGAAGAATACCCAGATAGAATCATGAACACCTTCTCCGTCGTACCATCACCTAAAGTATCAGACACTGTTGTAGAACCATACAATGCCACCCTCTCTGTCCATCAACTGGTAGAAAACACTGATGAAACATACTGTATT…
>EduN_188
CGTTGTTACAACTGGACAAGTCTGTTCCTTCAGCACTACATAAACATAACAAACATTGTGGATATCGGTAGAAACCATAAAACAGCTGTCACACTTGTCCCCTGTGAAATCTGGCTTGCAGCGACATTTCCCAGTGTACAAATCACACTGCTGACTCACAGATGACCCACTCATACAGCCACATGGCTTACACCCCTCAACAGGATTATAATCCCAGCTGTTAGAAGCACATCTTTCACATTGCACACCTGTTGTGTATGGTGGACACACACACTTCCCCAGTCAATGGGTCACATATATAACCTGGTTTGGTGCATGGTTGACATCTTCTGCATCCATACTGTGAGTATCCGAAGTATCCAGGTAGACATTTGTCACTATTTCTGATAC
>EduN_191
AATTTGAACACCTTCATCAGAGTTCCTGCTATATTATGTTCGTAGTCTTCAGTGCGTATTACCATAAGCTGATCTTTGTCAAAGACCTTTAACCAATCACGCAGAAAAGTACTGTAAAACCCCGAGGATATTGGTGCCCGTAACCTTTTATATAGAACTGTGTCATATAAACATGCCCGAAGACTTTTTCTATTGGTACAATTAGCAAAAGTAGACACAGCGTATTGAACATCTTCATGGAATTCCTTGGCACTGGGATATATATTAATCGCCAAATTCTTATGTAGGTAATGACTGTAGAGTCTTTCAGCTGGGTCTCGTATAACGAGAATTAGCCTGATATTTGGATTTATATGAGATATCAGATTCGGTGTCATATAAACTGGTTCTTCTGATGTA…
>EduN_192
GAAAATCTTGATGAACTTAAACAAGAATTGGAAATGGACGAGCATAAAATACCACTTCCAGAATTATATGAAAGACTAGGATCTGATCCCAATTCGGGTTTGACTATAGAAGATGCAAAACGTATCTTAGAAAGAGATGGTCCAAATGCTTTAACGCCGCCGCCTACAACTCCGGAGTGGGTGAAGTTTTGTAAACAATTGTTTACTGGGTTCTCTTTACTACTGTGGATAGGAGCTATTTTATGTTTTATAGCTTATTCTATTCAAGCTTCTCAAGATGAAACTCCACCAGGTGATAATTTATATTTAGGTATTGTATTAACAGCTGTAGTAGTTGTCACTGGTTGTTTCTTCTTATTACCAAGAAGCCAAAAGTTACAAGAATTATGGATTCCTTTA…
>EduN_197
AACGGTTGCTCTTGTAGTATCGTTAATAGCTGTTTATGTAAAGTCTACTGAGGGGGTATGTACCGGGTATTATTATGATACTTGTAGTACATATGTTTATACTAAGGATAAATATACAACTGCTTGTGGATGGTGGGATAGATGTACAAGATACAAACAATCGGCGAAAACAGAGTATTACCGATGTCAAAAGAAATGTCCAACAGTTCATGGTGGATGGAGTTCCTATGGTAACTGGGAAAGATGGGGTAGTTGTTCAAAGACCTGTGGAAGTGGTTCACAGTCTACACGGAGACTGAGGTACTGTAATAATCCTTCACCGAAAAATGGCGGAAATGGTTGTTCTGGATCTAACAGTAAAAAAAAAAGCAGGTCATGTAATACAAACAAATGTCCCAT…
>EduN_205
CTTCATTGTCAAGTCCACTCTGAACTATTGTCACCTTTCCAGTTATATTGAGCAGTTTAGATGTGTCAAGGTTTGTTATTTCTTTTGGAGTCGGTATGACCATTTTCATCTGGACATTAGTATTTGTTGTTTTATAACGTTGATAACGTGACATTGGAGAATAAGGGTCATATTTATCTTCCTTCTTTCGCTTCCATTGTTTTGCGCTGGTAAACTCCCCAACAAATCCTTCCTTAGTACTATCGATAACACGTGCATTTAGTCCGTCTGCTGTGATGTACCAGTTTGGTGGAATGTCTGTTTTAGACACAGCCCAATTAGCGGCATAAAATGTTATTTCTCTCGTTCCATTTTGAGGTAACTCTTTGAATCCGGTTGTAGGTGTCATTGAGTAGAGAC…
>EduN_206
GGCGGCTCTTGTCTGAGGATCTGTGCAGTGATGAAAGGCTTATCACCGGCCAATATTTTAAATGATTGCATAACTTGTTCAGCAGTATCAGTATCAGCGGTTTCTCTAGTCATGAAGTCAAGGAAGGCTTCAAATGTTACATAGCCAGAATTGTTAGGATCAACTATTGACATAATTCTCTGGAAATCTGCATCTCCCTGTCGATCATCCCTGATATTATAACCCAGACTGACCAGACAAGCTTTGAATTCTTTAGGTTCTAATCGCCGCGATCTGTTTTTATCAAAGTGATTAAATGATACTCTAAATTCATTCATCTGTTCTTCACTGATGCCTTTCGAGTCTCTTGTCAAAATCTGGTTTTCTACTTCATTGATGTTTCTGGCAATCGCTGTTAAC…
>EduN_212
ACGAAATGATGCAGAACACACTAAAGAATATCTAAATTATAGATTTTAAAATAGAAGTGTGTCATGTATCTCATTCTGCGTATGAAGGAAACTGGTGACGCGGCACCGATTTACTGATATAAATACGTTGACACAATCAAATCCATAGCAACGCTGTTTGAACGAAGTCTGATACAAGTTTCACTAACGGTCTGAGAAAAATTTGAAAATGAGGGAAATCGTACATATGCAAGCTGGTCAGTGTGGAAACCAAATTGGAGCTAAGTTTTGGGAAGTTATCTCAGACGAACACGGTATTGACCCCACAGGAACCTACCATGGAGATTCAGATTTACAGTTAGAAAGAATAAACGTCTACTACAATGAAGCCACCGGTGGAAAATATGTGCCACGTGCAGT…
>EduN_229
CTTCAACTGCCAACAACCTCATTGATTGGTTGTTTCTGGAGTCAGCAGGAATAATTAAAAGTTTAGAATGATAACCACAGTAGTAAACGCGGCTAAGAGGCTGCTCAACTCGGCTACCATTTTACAACGGCCTAGGAATCCTGTGTTCCAATATACTTTATTGGAGCACGGCTCTTCCTAGTTACATTGGAGCCGGGGTTCCTGGCTCATACATTCCTATAGATCTCAATTTTTCCTATTCCAACCTGAATGAGGTAGAATAGAGGCTATAGACGTTAAAATGAAGTTTGGATCAGTTCGATGGAAGAACTGTCTAGCACCAATATTGCTATTTGTAGTGCTAGTACAATCTCAGGAAGAAAAACCATGTGTATCAAAAGATGGACAGACCTATCAGTC…
>EduN_246
TCTGGAATGAATGTTCTACGTATTATCAATGAGCCAACTGCAGCTGCTATTGCTTATGGTTTGGATAAGAAAGTAGGTGGAGAAAGAAATGTACTCATCTTTGACTTGGGTGGTGGAACTTTTGATGTGTCAATCCTTACAATTGAGGATGGTATTTTTGAAGTTAAATCAACCTCTGGTGATACCCACTTGGGTGGTGAAGACTTTGACAACAGAATGGTCAATCATTTCATTCAAGAATTCAAACGCAAGCACAAAAAAGACATTAGTGAAAACAAGCGTGCTGTCCGACGACTTAGAACTGCTTGTGAAAGGGCAAAGAGAACCCTTTCTTCAAGCACACAAGCAAGTGTTGAGATTGACTCTCTGTTTGAAGGAGTTGACTTTTATACAAGCATC…
>EduN_252
TTACACTCTGCACTTCTCTACCAATGTTTTCTATTATTTGCTTGATTTCTTCTCCCCGTCCATGTTAACATCATCAATTCGTTTCCGTCATGGCTTCTTTTTTCTTCTGTTGATATTTTAAGGACTTCTTGAATGTCATGCCCAGCATCTACTCTATGAGTTACCATGGCACACAGGACACAAATTGGTTTCTGGCAATCCACTTTGTTACAATAAAGCTCTAGTATCCGGTTGTGAACTGGACACATTTGTTGGTGACAGAAAGCATCCAAATTCTCCTTTTTCTGCAAATATTGAAGTTCCAAAATTTCATGCCCTCTTGTAAAATTGGTCCTTCTATGGGCAGTATGACACTCGTCGCATAAGAACTCAGAACAATCCTTGCATCGGAAGCTTGCT…
>EduN_266
TATTTGGTGCATCTCATTTATATGTAATGGCCAGAAAACATCGTGTAGTGTCCTCCCATAAGGAGCCCGGAACCTCGTGGATGATTGATATAGATCCGGTCGCCTTTCTTCAGTTCAAGAATGGCTTGAAGTGACCCCGATGTGTGTTTATCAAAAGCAGCATGTCCCCTCACAACCATTTTGTTGTTCTTAATCAGGACTAACTCGAGCCATTCATCTTTATTATAGGTGACGAAATTCACTGCAAATTCGTATGTGCCTTTCCGTGGAGCAGTAAACACTCCAGAACTTGCGTCATACCCATCCCCGATGTTTGTCTTTATAGAATCAAACTTTAATATGTGGTTCAGTCCTAAGTGGACATTGTTAGATAACGTTGCCAGAAATGCCGGTTTCTTT…
>EduN_267
CTCCCGTATTCTTTGTGATCTTTGTATTAATGGCCCAGTTTGTGTTGGTAAATGTTGTTGTTGCTGTGCTGATGAAACACCTAGAGGAATCTCACAGAGTGATGGCAGACGACGGAGCTGAGGTTGGGGATGGAGAAAACAATGACGCTGAGGAAGGTGGTGAACAAAAGGAAGATTCCAAATTGTCTGAAAAATCGGCTGACCAGAAATCAGTAAAGATTCCAACACCTGTACCAGGATATATCCGTCGTCTGAGAACTCCTGTCTCTAAACAGTTCTCTCTGCCTCCTAGCTTTACATTCTGTCCACCAAGCAACGAACAATTATCTGACCGTTCTGTTAGAAGTACTTTGTTGGTGCCAATAGATATAATGGTATCTAGCTACAACAGTAATCTAG…
>EduN_270
CGAAAATAACAAACAACTCAGTGATAGGTTATTAGATATGGAGGACTTGACGTCTAGATTGGAGGGCGGACAATAAAGTAGCTAAGGAATGAATGTGAGAAACTGTCAGAAGACCATGAGGATAAAGTCAAATTAAAAGATGAAAACAGGAAGTTAATACAAGAACGGGCGGAGAATGAACAAATGATCAAATTATTAGAGACTCAAAAAGAAGTTTTAACAAAGAGTTCTGAGAGTAGTTTGACCAAGTTACATGATGTGGAAACAACTTTCAGGAAAAGTGGAACAATTCAGAAATGAAAATGAACACCTCAGGGAAAGAATTTTAGAGTTAGAGAAAGTTCGAGATGACCTGGTTAATCAGAAAGAAGAGTTATTGGCTAGCACAGAATTAATATA…
>EduN_277
GCTTGTGACAGTCCTACAGACAGTAGTTGAATGAAGCTGTTTATTTTTGTGGTGTTTGTAATGGCGGCTGAAGCTCTTGATTCTTGTTACACGAGCCAAGAACGTAAAAACATTGAGGAACTTCAAAATCATATCCTGGCTTTCACGAAATCTGTTGACACTTTGAAAACTGACCTTGAAGGGAAATATACTGTCTTGAATGGTGAATGCCATAAAGATTGGAAGCCTTTCCGGGACCATTGTTATTATTTAGTTAAAGAAGAGAAAACGTGGTTTGAAGGAGAGAGATTTTGCAAGAACAAAAGCTCGTCTTTGGTTAATGTAAAAGATAAAGACGAAAATAAATGGTTACAGTCACAGTTCAAAGACGTGCAAACGTTTTGGCTAGGTATTACGGAT…
>EduN_288
CCTTAATCCATAAATCTCCTGTTGGGATTCTTTCCAAAGAGAATGTTCCTTAATTCTGGTACCATCTGTTGACTAATTAAATCCAATCTGGTTTCTAATGTATTCTCTACTCTCAATTTGTTGTTAACTGCTAGTAATACAACACCTCCAGTATATATCTGGCCCTAGTCTATTTTCCTGGTCAATTGTTACTATAACATTTTTCTTTGTAGCATCTTTGTATTTCTTAATTACTGATGGACAGTAATTCCTGTACAGCACTGGTATCTTCTGGTTTACACATAACTTGTACTTTTCCCTCTAACAGTCTGGAAAAGACCCTGTAGTTGATCAGACCTTCCAATAATTTCCTGTACTCTAGCTTTATCCTTTGTGATATTGTGTAGTTTAGTTCTGGCT…
>EduN_290
AAGCCCAGAGCAAAAGAGGTATTCTTACATTGAAATACCCAATTGAACACGGAATTGTCACAAACTGGGACGATATGGAGAAAATCTGGCATCACACTTTTTACAATGAACTCCGTGTAGCACCAGAAGAACATCCCGTTTTACTAACAGAAGCCCCACTCAACCCTAAAGCCAACAGAGAAAAGATGACACAGATTATGTTTGAAACCTTCAACTCTCCAGCTATGTACGTTGCTATCCAGGCCGTATTATCTTTATATGCTTCTGGTCGTACTACTGGTATTGTGTTGGACTCTGGTGATGGTGTCACCCATACCGTACCCATCTATGAAGGTTATGCACTTCCTCATGCTATCATGAGATTGGATCTTGCCGGTCGGGATCTCACAGACTATCTTA…
>EduN_291
GGAATGTGTAAAGCTGGATTTGCTGGAGATGATGCTCCAAGAGCTGTATTTCCATCCATTGTTGGAAGACCCAGGCATCAGGGTGTGATGGTTGGTATGGGACAGAAAGACAGCTACGTTGGTGATGAAGCCCAGAGCAAAAGAGGAATTCTCACACTGAAATATCCTATTGAACACGGAATTGTAACAAACTGGGACGATATGGAGAAGATCTGGCATCACACTTTCTATAATGAACTCCGTGTTGCACCAGAAGAACATCCCGTTTTACTGACAGAGGCTCCACTCAACCCTAAAGCCA
>EduN_292
CAACCCTAAAGCCAACAGAGAAAAGATGACCCAAATTATGTTCGAAACCTTCAACTCCCCAGCTATGTACGTTGCTATTCAGGCCGTTTTGTCTTTATACGCTTCTGGTCGTACAACTGGTATTGTGTTGGACTCTGGTGATGGTGTATCCCATACAGTACCCATCTATGAAGGTTATGCCCTTCCTCATGCTATTATGAGGTTGGATCTTGCCGGACGGGATCTCACAGACTATTTGATGAAAATTCTAACAGAACGTGGATATTCTTTTACAACCACAGCCGAAAGAGAAATCGTTAGAGACATTAAAGAAAAATTGTGCTATGTAGCTTTAGACTTTGAACAAGAAATGTCCACAGCTGCATCATCATCATC
>EduN_293
GTGACGACGACGTAGCCGCTTTAGTTGTAGACAATGGATCTGGAATGTGTAAAGCTGGATTTGCAGGAGATGATGCTCCAAGAGCTGTATTTCCATCCATTGTTGGAAGACCCAGACATCAGGGTGTGATGGTTGGTATGGGACAGAAAGACAGCTACGTTGGTGATGAAGCCCAGAGCAAAAGAGGAATTCTCACATTGAAATACCCAATTGAACACGGAATTGTCACAAACTGGGACGATATGGAGAAAATCTGGCATCACACTTTCTACAATGAACTCCGTGTAGCACCAGAAGAACATCCCGTTTTACTGACAGAGGCTCCACTCAACCCTAAAGCCAACAGAGAAAAGATGACCCAAATTATGTTTGAAACCTTCAACTCCCCAGCTATGTACG…
>EduN_294
CCACTCAACCCTAAAGCCAACAGAGAAAAGATGACCCAAATTATGTTCGAAACCTTCAACTCCCCAGCTATGTACGTTGCTATTCAGGCCGTTTTGTCTTTATACGCTTCTGGTCGTACAACTGGTATTGTGTTGGACTCTGGTGATGGTGTATCCCATACAGTACCCATCTATGAAGGTTATGCCCTTCCTCATGCTATTATGAGGTTGGATCTTGCCGGACGGGATCTCACAGACTATTTGATGAAAATTCTAACAGAACGTGGATATTCTTTTACAACCACAGCCGAAAGAGAAATCGTTAGAGACATTAAAGAAAAAT
>EduN_300
GGCATCACACCTTCTACAACGAACTCCGTGTTGCCCCACGAAGAGCACCCAGTCCTCCCTGACTGAGGCTCCCACTCAACCCCAAAGCCAACAGGGAAAAGATGACCCAGATCATGTTCGAGACCTTCAATGCACCAGCCATGTACGTCGCCATCCAAGCTGTACTCTCATTGTACGCTTCCGGTCGTACCACTGGTATCGTCCTAGACTCTGGAGATGGTGTCACACACACCGTACCAATCTACGAAGGTTACGCTCTTCCCCACGCCATCCTCCGTCTCGACTTGGCCGGTAGAGATCTTACTGATTATTTGATGAAGATCCTCACCGAGAGAGGTTACTCATTCACAACCACCGCCGAGAGAGAAATCGTAAGAGACATTAAAGAAAAATTATGCT…
>EduN_301
AACAAGAAATAGTCCACAGCTGCATCATCATCATCATTAGAAAAAAGTTATGAATTACCTGACGGACAAGTTATCACAATCGGTAATGAAAGATTCAGGTGCCCAGAAGCAATGTTCCAACCATCTTTCTTAGGTATGGAATCTGCAGGTATCCATGAAACAACATACAACAGTATAATGAAATGTGATGTTGATATCCGTAAAGACTTGTACGCTAATACCGTATTATCTGGTGGTTCAACCATGTACCCAGGTATTGCCGACCGTATGCAGAAAGAAATAACAGCACTTGCTCCATCAACAATGAAAATTAAGATTATTGCTCCACCAGAAAGGAAATATTCCGTATGGATCGGTGGTTCCATCTTGGCTTCACTCTCAACCTTCCAACAGATGTGG…
>EduN_304
GGAAATGATGACATGTACAGATGTCCAGACCATTTGTCGAGATCTATTTATCTTAAAACATTCGGAGAGAAATGTTATCGATACGAGAAGGGCGAATTATATTGGACGACGGCAAGAAGTCGGTGCACTGGAGAAGGAGGCGATCTTATCCAGATCAGGAATCAGGCAACACAAAACTGGGTCATGTCTACTTTGAATGAGCTACACTGGAACAAAAACGGTGTTTGGATAGGAGCTCATGATAGAGGCGACGAAATGAATTGGAAATGGGTTACCGGCGAAAGGATAAGTTGGAGTTTTTGGGGCGGTGGTCAGCCGAACTGTGACTGGTTATGTATGGAAGATTGCGGAAGCTTACGTCGTGATGATGGCGGTAGATGGCATGAATAAACCATGTTC…
>EduN_312
GTTTGATGTCCTGCTCTGTTTTAATTTCCATCTTGATTTCTTGTTTAATATCTGGTTTAACATCCTGCTCTATAGAGTTAGTAATTGGTGTTACTGAGTTAATGAGACTGTTACTAGCACTAGTGGTTACTGTTGTTGTAGACGTAGCAGGTGCTGTACTGGTTGGCTGTGTAGAACCAGTTGTACATGGAGCTGTCAGAACATCTACTAATGTTTGGGGCTGACTACCACCATTTTGATTGAGACTAGTATTTATATCTGCGGACATCAGCTTGTCTGCTTGTAATGCATTATGTAAATTTTACTTAATGACTGAGACGATGACAACTGTGATGATACTGATGTAGGGTTTTGTTGACAAAAGTAGGCTGTGGTGAGAACTGTGACAAAATACTGGAT…
>EduN_315
TTTTTGTGTATATTAATGCAATGCTCATTTCCACCTTGGTTATTCGGTTCTTTTACAAGTCGGGTATGCCATCCAGTCACAATAACATTACTTTGACTGGTCGCCCAGATCCATCTTCCTTCACGTTTACTATCTGTTCCACCAAGCCAGAAAGTTTTTGCATATTTAGATGCCTGTTTCCTTAAGTAATCTCTTTCCCCATATGACACTACTTCTGCAAGCATACTATTTTTCGTTATGCATTT
>EduN_325
GGCACATTAGACCTTACACATGTAACAATACACATATCTGGCAAAGGCACAACAAAGAACAAATAAAAATCATGTGCTCTACAGTATCAATAATATATAAACCTAATGTCTATCACAGAAAAACTAAAAGCAAATGTTGCATATAAAATAAAATTGCAGCTACTTTATAATGTGTGATAAGTTTCAAAGGGATATGAAAATTGAATGTTTCTTTATATCGAAAAATATGATGTCATGAACTGGTTATACTGAACTATGCAAATATAAATAAAATGATTAGCTTTCAATAACAAAACAAAACTAGTTTTTCCTTACAGATAACAATTTCACTTCAACTGACTCACACTCAAATGTTTGATGTTTAAATCATGTCACTTTGGAACAAATCACTAATTAAAA…
>EduN_333
GAACATTATCAAGCAGTACAGAGGCAAACGTTGAGATAGACTCATTGTTTGAGGGAACAGACTTTTACACAAAAATAACAAGAGCACGATTTGAAGAACTGTGCTCAGATTTGTTCAGAACGACACTGGAACCAGTTGAAAAGACTTTAAGAGACGCTAAACTTGATAAAAGTAGTATTCAAGAGATTGTACTTGTCGGAGGTTCAACAAGGATACCAAAAATACAGAAAATGCTGTCAGAATTTATGAATGGGAAAGAACTTAATAAATCTGTCAATCCAGATGAAGCTGTTGCTTACGGTGCAGCCGTTCAAGCTGCTATTCTGTCCGGCGATCGTAGCGACACTATCAAAGATGTACTTTTAGTTGACGTAGCTCCATTGTCTCTTGGTATTGAAA…
>EduN_357
CTAACACCAGCAAGGGTGGATTTTAGTACAGAATACTCTTTGTAGTGAACTGCACATGTTGCAGTTCTTTTTGTTCTGGTCTGAAAATCATTCAAATTAAATGAAGAAAATTATGCACTAAGCAGCACTATGTTTTTTTTGGTCCAACTTAAAGGCTATGCTATTTTGTTGAAAATCAATGTTCACTTCAAATGTTTGGATTGAACATGTAACCTTCACCTTGTAACTTGAGACCAGATTTTGATGGAAAACAAAAAGAACCCTATCACAATAATAGTGTTAATAATAAATAATTAAAATGTATGATCCTAAATTGAGTCACTTTTATAATTCGTCTTTCTCTGATCCTTCTTCATCACCTCCCTCTCCTCCTTCGCCTCCTGGTGGTGGAGCACCTCC…
>EduN_363
TTTTGTATTTTTCTACCCTATATACCACTTTGCCTCATATTCTTATTTAAAGAAAAAATTACACATCCCTAATTAACTGGGCATTTAAAAAGTACGGAATGCGAGTACATATGTTCAAACTCTTTTAGATCATTTTTTAGTAGCAATAAACAAAAGAACTATGTCAATTGGACATGCTTTGATACTATTTATGCACTTGAATTTTTACTTGATAACATTTTTGTTCGCTTTGGAGATTCCGTATATCGTCAAGTTATTGGAATTCCAATGGGGACTAACTGTGCACCACTTATTGCGGACCTGTTTTTGTATTGTTATGAGTTACAATTTATGACTAAAATTAGCAAAGACCCATCAAAACAACATCTGATAAAAAAATTTAACAATACTTTTAGATAT…
>EduN_364
TCAATTGGACATGCTTTGATACTATACCTGCCCTTGAATTTTTACTAGATAATATTTTTGTTCACATTTGGCCTCAACTTTGGAGATTCCGTATATCGTCAGATTATCGGAATTCCAATGGGGACTAACTGTGCACCACTTATTGCGGACCTGTTTTTGTATTGCTATGAGTTACAATTTATGACAAAAATAAGCAAAGACCCATCGAAACAACATCTGATAAACAAATTTAATAATACTTTTAGATATTTGGATGATATTTTGGCTCTCAATAATGACGACTTCAGTATGTATATTAAAGAAATTTATCCTGTTGAACTTACTTTAAATAAAGCTAATACTAACAATGACCACTGCCCTTTTCTCGATCTTGATATCTATATCACTAATGGAAAGCTG…
>EduN_371
GTCAGGGTGAGATACTCCTCTTTAGCGTTTAGTATAACTTTATAAAACAGACATCATGTGTGACGACGAAGTAGCCGCTTTGGTAGTAGACAATGGATCAGGAATGTGCAAAGCTGGTTTCGCCGGAGATGATGCTCCAAGAGCCGTGTTTCCCTCCATCGTTGGAAGACCAAGACATCAGGGAGTCATGGTTGGTATGGGTCAGAAAGACTCCTACGTAGGAGATGAAGCCCAGAGCAAGAGAGGTATCCTCACCCTGAAATACCCAATTGAGCACGGTATCGTCACAAACTGGGACGATATGGAAAAAATCTGGCATCACACCTTCTACAACGAACTCCGTGTTGCCCCAGAAGAGCACCCAGTCCTTCTGACTGAGGCTCCACTCAATCCCAAAGC…
>EduN_372
CTACATCATCGTCACTTGAAAAAGATTATGAGTTACCAGATGGTCAAGTCATCACCATTGGAAATGAGCGTTTCCGGTGCCCAGAAGCCATGTTCCAGCCATCTTTCTTGGGTATGGAATCAGCTGGGTTACACGAAACCACCTACAACAGTATAATGAAATGTGACGTAGATATCCGTAAAGATTTATACGCTAATACCGTACTATCTGGAGGTTCCACCATGTTTGCTGGAATAGCTGACAGAATGCAGAAGGAAATCACTGCTTTGTGTCCACCGACTATGAAAGTTAAAATAATTGCCCCACCAGAGAGGAAATATTCCGTCTGGATTGGAGGATCTATTTTAGCTTCACTTTCTACTTTCCAACAAATGTGGATAAGTAAGCAAGAATATGATG…
>EduN_373
TGAGTATCGAACTTTAGCCTTACAAAGATGTGTGACGAGGATCTCTCCGCTTTGGTTGTTGACAATGGGTCTGGAATGTGTAAAGCTGGTTTTGCGGGAGATGATGCCCCACGAGCAGTGTTCCCGTCTATTGTTGGACGCCCAAGACATCAGGGTGTCATGGTTGGTATGGGACAAAAGGACAGCTACGTTGGTGATGAAGCACAGAGTAAAAGAGGAATTTTAACACTCAAATATCCAATTGAACACGGAATTGTTACAAACTGGGATGACATGGAAAAAATCTGGCATCACACATTCTACAACGAACTCAGGGTTGCCCCAGAAGAACACCCCGTACTTTTAACTGAAGCACCTCTTAATCCAAAAGCTAATAGAGAAAAGATGACTCAGATCATG…
>EduN_376
ATCTTATCTTGTCCTCAAGGATAGAAAGAAAAAAACAGCCCGTCATGGCAGCTTGGTTAAATTTAGCATCAGTTATTGCAGTGCTCTTCTCACTTGCAAATGCTCACAAAAACTACACAGTAACAGAGGAAATCTGGTTTGATGTAGAGGTTAAGGATCATGATGGATTAGGAGAGGACTATAGAGGCAGATTTGTTGTGGCTGTATTCGGAGATAAATGTCCCATGACCTCAATGAACTTCCAGTCACTAGCTAAAGGTTACAAAAGAGGAACAAAGAAACAATTGAGTTACAAAAGATCACCAATTCACAGAATTGTTCCCGACTTTATCATTCAAATGGGTGACATTACTATTGGAGATGGAACCGGAGGTGAAAGTATCTATGGACCAACATTTG…
>EduN_378
AGAAAAAAGCTACGAATTACCTGACGGACAGGTTATCACTATCGGTAATGAAAGATTCAGGTGTCCAGAGGCCATGTTACAACCATCTTTCTTGGGAATGGAATCATCAGGTTTACATGAAACAACATACAACAGTATCATGAAATGTGATGTTGATATCCGTAAAGACTTGTACGCTAATACCGTATTATCTGGTGGTTCAACCATGTACCCAGGTATTGCCGACCGTATGCAGAAAGAAATCACAGCACTTGCTCCATCAACAATGAAAATCAAGATTATTGCTCCACCAGAAAGGAAATATTCCGTATGGATCGGTGGTTCCATCTTAGCTTCACTCTCAACCTTCCAACAGATGTGGATAAGCAAACAGG
>EduN_381
TTTTTTTGGTCCAATTGTGACGATTTAAAACATTAACTCAAAAAAGTCTTTATACATTTCATAGTAGATTTAAACAAATATTTAGTGAACAAATTTTGATATATTTGGACCATTGTCTGATGGTTTAAGAGTCTCCGTTGATGCTCTCTTTGTCATACATGTACTCCCCAAGACCACTTCCAACACGTTTGAGCTGGGTGATGTGATCAGAGATTTCCTTGATGGCATTCACTTGTTCTTCCAAGTATTCAGACTCCAGAAAATCACACATCTGAGCATCATTATGTGAATCAGCTGTTTTGTGAAGATCCAGTAGAGATTGATTGACACTCTTCTCCAAGGACAAAGCAACTTGCATAGCATCAAGGGCTGTTCCCCATTCATCGCGATCAGGTTTCT…
>EduN_383
GGTTCTTGATTTCTCCACCAAAGATCTTTTGTTGCAGACTCTTGTGTAAATTACAATAATCAATGGTAATCTGTTGGCTGAGATGAATTTGGTTACGGCATCAGAAGTTACTTCCCCTTCAAAGTTATTACGTCCTTCATCAAACTTCTTGAAGAGAGCAACACCATCAGATTCCATTTCATATTCTTTGAAGATATCAGTATTAGATGTAATTCCAAATGGGATATCATCAATACCTTGTGCTGCTTTCTCGTATTCTTTAGCACTGTCTGACTTCAAATCCTTGAAGAAACCAATAACAACAACTTCATCTTTTTCTATCATTGCTTTAGCAGCATCTACAGAATCTAAAGTAACACAAGCGGGACCAGTCTTCTTCTTCAACCAGTTTACAATATC…
>EduN_393
AACGAATATAAAAAGATTGACTGATTTAGACCTTTCGGCAAACTTTTGTTCAAATATTTCAAAGAATTTTTTTAATGCAGATTTCATCAATTTAAGAAGCTTACTGCTTCAAAACAATCTTTTAGGTCTCGTTCTACCAACGGATGTTGACGGAGAAATATTTCAAAATCTCAAAAACGTCGGGTACATTAACCTTTCAACAAATAAAATAGCAAATATACCATATCTTGTATTCAAAGAGCAACACAATTTAGAAAGATTAGACCTCAGTGAAAATATGATTGATGGAATCAAACTTTAAAATATCTCATATGAGAAAGCTCATTGTTTTTAAATGTAAGGAATAACAGAATATCAACACTGAGTCAATATGCAATGAACGAGTTGGACTCGATAGCC…
>EduN_398
AGAAAATCTTATTATGGTGGGAGGATTTTCTGAATGTGAGCTTATACAGCATAGAATGAAAGAAAATTTGGAAACATAAAAGATAATTATTCCTGAAGAAGCAGGTCTTGCTGTACTTAAAGGAGCAGTTTATATGGTCACCAACCAAAGGCTATCAGTGCCAGAGTACTGCGTCGTACTTATGGTATCCAGAGCTGGCCGGAATGGGATCCTCAAATGCATCCAGAATCAAAGAAAGTCAATCTGGGTGGTGTTAATCGATGCAAGGATGTATTCTTTAAATATGTCCAGGTTGGTCAGCAAGTGGAGACTGGTCATGAAGAGTCCCAGGTATTCCAAGCTTTGAAACCCGATGAAAGAACCCTAGAGTGCACAATCTACGTATCAACACGACCCTAAC
>EduN_417
AGCATCTGTAATCAGCAATATCAGAGGCTTGTAAATCTAAGATGGTCAGACTTGGATGAGTGACAGTAGCTCCTTGATATTTGTTGCCGTTCAGATTAAGTTGACTGGATTGTCCGCCAACTATTTTGGTCCAAATAACACTTGTTGCGAATGGATTAGATGTGAATTCACATGGAATTTCAACAGACTGGCCCTTCTTTCCTTGAACGGGTGTAGTTGTAATCGTCACCTTGGGTTTAAAGTGTACAGTTACAGTGGTCTGAACCTCTCCAGAACCCATTGTATTAATAGCTTTACAGATATATGTGCCTTTGTGACTCTCCTGTGCATTGTTTATTGTCAGTACAGGAGAATTGGAAATAACATTATCAGATCCAAGTTTTCTCCATTCGAATGTAG…
>EduN_430
TTTATTTGTAAAACTACTGATCATGAAAAAGAAAGTACTTCTTTCACTTTAGCTCCTATGAGGGTGATCCAAACGACCTTGATCTTGGTGATGAAGTGGAATATACACTCTGCAGAAAAAGTAGCCAAACACAGTGCTGAAAATATATTCAAACTGCCAAAAGGAACCATTCCAACTGAGGAAATTCTTCGTGATAAAGGTCAGCAGCAGGGGAAAGTATTGCGACCAATGAGAATTGTCAATCCTGATCAAGAAGAATACTGTGGACTTGTACAACCTTTTAATGTTGAAGTAGAAGACACAGAACCTGAGGTATATCCCTATGGAATAACAAGTCTAGCAGATAAAAGGGATTTCCTACAGAAAGGGGATTCTGTAAAGTTTAACCTGGCTTTGAAC…
>EduN_435
CTTAGGAACAAAATGGAACAAGAACCGAGTTACATGGCGACTTAATTCATTCAGTGGAAAAATATCCCAAAATCAAGTTAGAGTTGAAACAAGAAGAGCCTTTGACTTGTGGAGTAAAAATAGCCGACCTTCAGTTTGTAGAGCGACAGTCTGGAGACGTAGATATAGAAATCGATTTTGGAAGACGAGAACACGGCGACGGAGCGGGAAATGCATTTGACGGGCCTGGTCGTGTGCTTGCTCATGCTTTTTTTCCTCCCTTTGGCGACACCCACTTTGATGAAGATGAAGGATGGGTGGTTAATAGAACAGGGGTAGATTACTTTACTGTAGCAGCACACGAATTTGGACACGCCCTTGGATTAGGTCATTCTGAGATCAGACAGGCGTTAATGGCAC…
>EduN_438
GGACAACAAGGCAGATATTCATCATTGTAGGAATGATCAAGAATCTCCCCTGTTCATTGCTTGCAAGTATGGACTAAAAGATACAGTTAAGTTATTGCTAGAAAACAAGGCAGACACAAACAAATGTAATATTGTTCAAGAATCTCCTTTGTTACGTTGCTTGTAAAAAAGGAAAAAAAGATATAATACAGCTGTTATTGGACAACAAGGCATGCATTAATAAATGTAGGGAAGACTGGGAAATCTCCTCTGTATATTGCAGGTCAGGAAGGATATGATGATATAGTACAACTATTAGTAGACAACAAGGCAGACACAAACAAGTGTTATACTGGTATAGCACCTTCCAAACTAACTACTAAACACAGAATATATGAACCAAGGGTATATAATATATTA…
>EduN_441
TTATTTTTAAAATAAACTCTTTTGATAAAAAAAACTAGAATTGTAGTATAATGGATTTGGTCATAGTTCTAAATATCTTGACAAAATAATTCTGGATTTCACTGTACAATTCAACAATTGTCATTAATCTATTATATTCAAATAAGAAAATTCTTTAAGATATATATATGTTAACAAGCAAGTAAACAAGCAAAGCAACCAATACTTTTCTAAAGTAATTTTACCAACTATAACCTCAAAAGGCACGAAAACACATCGTATAGTTGTAAATCCGAAAGCATTTGAAAGCATACAAAAACATAATGTATTTGATGTCTATGAAAAATCTCTCTATGGAATGTTTCATTGTCTACATAGCTGCACTTTTAGTTGTCAATTTTGATATCCATTGTAGCTTTC…
>EduN_459
GTTTTTTCAAGAATAATTCTTGACTTTTCATTAAGTTCAAAATGCACATTAGCAGATTTGGGCTCTGCACCGAGTATTATATTATCATGTTCACTTTGAAAAAACTGTTCTACTGTTCTACTCGTAGATCGGTTTGATATATGACTATTTCGTCGTAAATTATGATCTCTTTTGAGCTTTCGGATTTCTCTTCTTACCTCTTCGTTCATAAAACAAAACAATATTGCAACTGCAAATCCTTGAAAGGAATTAAAGAACATTTCAGTATACAACCATATAACTTCTAACATTGGTTCCATACACACAGGAACAGCAAATAAAGGCAAGATAAATACACTACCAAAATAATAGGAAATTAAAATCAAAGGTCGACTTTGCTTAACTTTCTGTATCGACTTT…
>EduN_463
ATCCTTGTCCTCATCCTTGTCCTCATCTTTCTTTTCTGGTTCATCTTTCGTTGCTTCGTCGTCTTCAATTGGTTCCTCAACTTCCTCTGTCTTGCTAGACCAAATGTAAATATTAAAGTTGATAAACTGACTGTACTTTCTGACAAGGTCTTTCAATGTATTCTCTTCCAAGAAATCATGAGCTTCTTCTTTCAGGTGAAGACTGATCTGAGTTCCTCTACCCAGTGTGTTTCCTCTAGGATCTTTGCTGACAGTGAAGGCCTCAGAATCAGACTCCCAAACATGTTGTTCATCATCATTGTGTTTTGATGTTACAATGATTCTGTCAGATACCAAGAATGATGAGTAGAAACCAACACCAAACTGTCCAATCAAATCTGTCATTTCTGTTGCTGATGA…
>EduN_464
GGAATAGATGGTTTACCTGGATTGAATGGATTATCAGGTGAAAAGGGAGAACCTGGATTCACAGGTGAACCAGGCAGGTCTATTCCTGGTCCCGAAGGCCCTTCAGGATTCCCAGGAAGGGATGGTGTCCCAGGTATAAAGGGTGAAAGAGGAAGGGATGGTGTGCCTGGTGAGTCTGGTAATTCAACAAGAGGCAGACCTGGATTACCTGGACCAAAAGGTGAAAAGGGGTTGAAAGGTTATGGTGGATTGCCTGGAAGAGATGGTGAACCTGGTATTCCTGGATTCAAAGGTGACAGAGGAGGATCTTGCAGTGATTGTCTCCCTGGACTGAAAGGAGAGCGTGGTTTAAATGGTGTTGATGGTGTCCCAGGAAGGAATGGCCAGCCTGGACTCCCT…
>EduN_475
CAAGTTCAGCACCCTCGGTATAATGTCCTTTGGCCCAGTTGTTTCCAGCTCCACTCTGTCCGAAAACAAAGTTGTCTGGTCTGAAGATTTGACCGAATGGTCCTGATCGGACGGAGTCCATAGTTCCGGGCTCCAAATCGACCAAGATTGCTCTGGGTACATATTTACCACCTGTAGCCTCATTGTAGTATACGTTGATTCTTTCTAATTGTAAATCTGAATCTCCATGGTAGGTTCCGGTGGGGTCGATACCGTGCTCGTCTGAAATGACTTCCCAAAACTTGGCACCAATTTGGTTACCGCACTGTCCGGCTTGTAAATGTACTATTTCCCTCATTTTGTCTTTGTGTCTTTATCTTTT
>EduN_481
TAGGATTTTATTATGCCTGGGCGGACAGACGAAAGAAGAACATTAAGGAATTCCTGATGGCTGGAGGTAACATGAGTCCTATTCCTGTGGCACTCTCTCTACTAGCCAGTTTTATGTCGGCCATTACTTTACTGGGCACACCAGGAGAGATGTATAACTACACAACTATGTACTGGTGGATTGGACTGTCGTATTTCTTTGTAGTGTTTGGTGCGGCACATGTGTTCCTGCCTGTATTCTATAACCTTAAGGTCACCAGTGCATACGAGTATTTGGAGCACCGTTTCAGTAAGGGCGTCAGAACAGCAGGTTCTATGACATTTTCTATACAAATGTTGTTGTATATGGCGCTTGTCCTGTATGCTCCATCACTCGCTTTAAATGCAGTGACTGGGTTTA…
>EduN_484
ATATTTTGAATATTATTAAATCAAATACTTAAAAAGTTAAAATACAGAACGTTTTTTACAGTTAAATAGTGTGATCTGTCTGCACTAATGTAATAAAAAATGTGTATTGTTCTACCTATAGTATCTACACTATGTATAAGGTAAATGTCATTCTGTTTTACTTCAAACTTAAGCATCTGCCTCGTCTCTCATTCTCAGTTTTATTTTCCCAACTTCTAGTTCATCTGAAGAGTCGTAGACAGGATTCTGTACACCCTTCTTCATGAAGACCTTGACATCCATTTCTTCATACAGAGGTGGTTTTTCATCTCCCAAAACGTACTTTGGTGGAAGTTTCATTCCACCGGTTTTACCATAAGATGGAGGAGGAGTTCTGGGTGGAGTTGCAGTTGAGTAGAT…
>EduN_487
TGTTTACTGATCCACATCTGTTGGAAGGTTGAGAGTGAAGCCAAGATGGAACCACCGATCCATACGGAATATTTCCTTTCTGGTGGAGCAATAATCTTAATTTTCATTGTTGATGGAGCAAGTGCTGTTATTTCTTTTTGCATACGGTCGGCAATACCTGGGTACATGGTTGAACCACCAGATAATACGGTATTAGCGTACAAGTCTTTACGGATATCAACATCACATTTCATTATACTGTTGTATGTTGTTTCATGGATACCTGCAGATTCCATACCCAAGAAAGATGGTTGGAACATTGCTTCTGGGCACCTGAATCTTTCATTACCGATTGTGATAACTTGTCCGTCAGGTAATTCATAACTTTTTTCTAATGATGATG
>EduN_492
GGCGTCGCAAGTACAGCTCCTTTAAGCCACCAGTATGACTCTCAAAGTAGGAATCAATGGATTTGGACGTATTGGACGTCTGGTGATGAGAGCTGCCCTAGACAAAGGGGTATCAGTTGTAGCTGTTAATGATCCTTTTATTGACCTTGAATACATGGTGTATATGTTTAAATATGATTCCACACATGGTCGCTTTAAAGGAACAGTTGAAGCAAAGGATGGAAAACTTGTCATAAATGGAAATGCTATCACTGTTTTTGGAGAGAGAGATCCAACAGCTATCAAATGGGGAGATGCTGGAGCAGAATATGTTGTTGAGTCTACTGGTGTCTTCACAACCAAAGATAAAGCATCTGCCCATTTTAAAGGAGGTGCCAAGAAAGTTGTTATCTCAGCACC…
>EduN_507
AAAGCCTTAAAGCTTTATCCATAAACGTATTACCTCCCTTCCAATCATTGGCATTCATCTCCATTAGTACTTTAGCGATTTCCTCTTTTGTTTTGAAATCGTCTAATTGGAATAACATTTCCGGGTCATTACTAAAGGTCATCATTCCTACCCTCACCTGATCAGATCCAACGTCAAAAGCTTCTATTACCTCTCCCACAAAATTAAGTTCCTTTTTAACATTTTCAAATACGTTCAGACTGGATGATGTATCAACAATGAAAAATACATCAGCTTTTTTCTTGAAGCATGCTGGGTCGTCTCTCTGTGGTGGCTTTGTTGGAGCTGGTGGAGCAGGTGGAGG
>EduN_508
TGGATGCTATCCCGTTTATCTCGGTTTTATCCACCCCACTTCCAATTCCTATGGCAAAAACGTACGCTGGTAGGCTTTTTATATCAGACGCTTCCGTTTGGGTAAGTTGTTTCCCTTCCAAACCAGTTATTGGAGCATGGCCAGGATTTGTGTTGCCGTCAGTTAGGACTACTACAACATTCGCTATGCCGGGCCTCTCGCCATTTCCAGTTGCAAAAACTGTTTCATGGACGTATTCCAAGCCCAAGTAGGTTCTAGTCGACGATCCAGATACATAATTTATTTTGTCAACGGCATTCAGGACATCCACTTTATTCTGGTCATCAGTGAAGCCGAACTCGAATACCACATTGCTACTGAACGAAACAGTCAGCTACTCGACTCTGTCTTCGGTCCCGGG
>EduN_541
GAGTTGGAAGCTAGTCTAAAACTAAAAATTAAAGGAAAGTTACTTTGAGATCAGGAAAAGGTTCAGGGATAATGATCCAGAACAGAAAGGAAATGTTTCCAGGGAGGCATTGCATAGAATTCTTGTGACAATTTTAAACGTTTCACTGAGTCAAAATGTGTACAATCGGCTGATGGAGAGGATTGGATTAAGGGATAAACAAGTGATTAATTACACTGAGTTCTTTGCCTATTTCCGTGATGGACCAGAGCCTAATGATTATCCAGGTTGGATGGACCCAGTACAGAGGCAATACCAGGATAAGGCAGTCATGTCATCTATACAAGTTCATTCTAATCTGAAAGAGAAGGCAAAACAGAGATTCTTGGATATAGCAGATTTAACTACCCCAGCTAAACC…
>EduN_550
GGAAAGGATGGTGCACCTGGTCTTCAAGGAGAACCTGGTTTACCTGGTGAAAAAGGAACCAAGAGGTTTTGATGGACCAGTTGGACCTTCAGGAGGTAAAGGGGAGTAAAGGAGATTCTGGAGAACCTGGACCTAGAGGACAAGCTGGTATCAATGGAGAACCTGGAGCGTCTGGACCTATTGGTCCACAGGGAATACAGGGTTTGTCTGGAAATGATGGGTCTGTAGGACCTCAGGGTCTGCCTGGACCACCAGGTCCTCCTGGATCAGGTTATGATGGACCAAGAAGAGGAGATACTGGACTTGTTGATATTGAAGGCTCTGGTGGAGATTGTGGTTGTGAGCCAGGTCTACCCGGTATACAGGGTCCACAAGGACCATCAGGAAAGCAGGGACTTC…
>EduN_555
GTACATTCTGTAAAACAGGAAGTTGATTGAAGGATGGATGTGAAAATTCTTCACATGGTTATGCATGACTTAATCATTTCAAAGGACAGATGGACTGAATGAAAGGTTAAGCAGTATTTCTCCTCCTTCGTGGCGACGACATAGAAAAAACAGATACCATTTTCATTATTTTTTTATTTTCTTTTTTTAATTGAAAAATGGTTGCACCAGAACCATTTTGTTGCAGTAGGTCGGTTTCCATTTAACAACAATAAATAATCATTCTTGTTAACAAGTGAAAAAATAATAATAGAAAAATATCACACAATATTTTGGGTCTAGACAAAGAACATATAAAATGCTGCTATAAGAATGCCCACAAGGAGCAAGATCTATGTTGGGAAAAAGGTCCAATAATCC…
>EduN_564
AAAGAAGCGAAAAAGCGTGTAAAATGGCACCTCCATCATATTCCGATTTAGGAAAATCTGCCAGGGATCTCTTCAGTAAAGGTTACAACTTTGGAACCAACAAACTAGAGGCTAAAACAAAAACAGATAGTAAAGTAGAATTCACAAGTAAATTAGACCACAATCATGATACTGGTAAAGTTGCTGGTAGTTTAGAAACCAAGTACAAATGGAAAGATTACGGATTAACATTCAAAGAAAAATGGACAACAGACAATGTGTTAAACACAGAAATAACTGTTGAGGACCAAATTGTTCAAGGTTTAAAATTAGCATTTGACACAACATTTGCTCCACAGACAGGAAAGAAGCAGGGAACAATTAAGACTGGATACAAACAAGATTATGTAAATATGGAAT…
>EduN_566
GTTGTACCTGGAGTAGTTGTTGACTGTGATGTACCAACAGTGGTTGTTGGCTGTTGTGTTGTACTTGGTTTAATTGTTGTCACTGGAGGTGCAGGTGGTGATTGAGTTGTGATAGTCGGTACTGTTGTACCTGTCGTGATTGGCTGTGTTGTTACAGAGGTTACCATTGGTGTCGTTATACTAGAAGCACAACCAATTACTTCAAATCTTAGTTCAACTGGTTTGCCTTCTGGTATAACGGGAAATAGTTGAATGCTTATGATATTTGTTGTTCTTATTTCGGCAGGCATCTCAATAGTCACTATTCCAGTATTATCTGTGTTTCCAACAAACGTCATCTTTTCATGGTTAATATTCTTTATATACTGGAACTCTTCAGGTGTTTCCTTGATTCCAATA…
>EduN_579
GTTTTATAACTTTAATATTCATAATAATAGTAACAAAAATGGTGTAAAATTATAGTTAACTTGCTGAAAGTATAATAGAATTGGAATCATATTCACGTATGCCCTTATCATTTGCATATGACCTAACATTAACATATACTTTGACAGATAACATTTTCAAAACAATAACAAAGCCTCGGAGATCTAACGGATGACAACATCTTGGTCCCACATACTAACAATGTAAAATGAAATTGCACCCTTTTGGTTCATTGCATCAAAACACCTTTAGAAAGTAGATGGCAAGATCTAATAAATGCAAATGAGGATAAAAATGAACAAAAAGAGATAATTATAATTCTGAGATTGATTTCCTAATCCATAATATGTCGTGTGTTTCCCATATTCATGCCAGCTTGT…
>EduN_603
AAAAACTAGGGGTGATCTCAGGTGCTCCGGAAGGGTAAGCAGATCCTGCTCCACATGTGGCACCCGTCGTGTTGCTTATGTGATTACAAATCCGGTAAATAGTCTAATTCGGTAGGTCACATTCATGAAAGGGAAGGGGATTGTAGTTACGACGTAAGGAACATATCCGATATCATTTGTGAAACGGTTATTCCATAACGGTCAACCAACTCGTGATGGCGTCCGTAAAATTTACGAAGGGATGATTTCAACTTCACCATTTGGAACTCTTGGTTTAATAGCTTCCTTGTGAGCAGCAATCAACCCTCTATCAAGAAAATCATGATAGGAAATGCAAGCACGGGAATATCGTATCAATTGGGAGATATATACCCCGTATGCAGGTGCTGCTGGAATGTT…
>EduN_622
AGATTAAGATTGTCAACTACGTGAACACTGTATTTCTTTGTAAAGTAAATCCTCATTATTATAACCAATCGTGATGTGGAACAAACTTCAGATGGTCTGGTTCCTCATTTATATGGGTTTCATTGCTAGGACAAGGAGAAGGAATATTAAAGACTGTAGAGTTGGTGACGCCTTTTTTAAGTCCCAAATAGCCAGTATTACTGACTGCACTGGTTGAAAACCCTGATATTGCTTGAAGAACACACTGTCCAGCACCAACATTTACGACAATTGCAGTTTTGTAGTCCAAAGGATCAGACCAGGAGTACAACTTGACTGGAAGTTTGTTAGGGGTAGCTCCATAGTGGGATGATGCTGTGAACCTTGCCTTAGGAGTCAAACATCCTGTCATACTACCAG…
>EduN_626
AATTAGATCCACAACCAACACCAACAAATATAGTGGCAGTACTACTAGCACACCATCTCTAACCATATTTAATGCAGACCAAAATGATGTAGGAAATTACACATGTTTTGCCACCAACAGTGTAGGAACTGGACAGAGTACAACTACTCAACTGTCTGTTACTGGAACTGTACCAACAGTTCAAGTTCAACAACCATCATATTCAGTCACCACTGGTAACTCTGTTACCTTGGGGTGTACTGTGACATCTACACT
>EduN_646
AAACAGTTTACAACTTAGACTTCAGACGGTAAACTGAAAACATGGCACTGCCATTTCTTCCAGGAAATTCTTTTAACAAAAATACTTGGTAAAACAAAATACCACTTGTCCCATCACTTTGATACTAAAAATGATGTGACTATGATGGTTGGGGAGGAGAGGCCAGGAATTGGTGGTGAACTCCTTAGGGGACAAAAGGTCAAACCAAGGAGCAGTGTGTTCCCAAGAGGAAATGGTTCCAATTTACCAGCCTGGGTAGCATTTGATAGACAGGTCATGTGCTTTGATGCTTTTTTCCAAGAAGCTGTGCATGAGAAGCGTGAAGAACAATTCAGAGTTAGAAACTGTAAAATTTACTTCTACCTTGAAGATGATTCTATCCAGGTCATTGAACCAAGA…
>EduN_647
CGTAGAGTTCTAGGTCTTAAATGGCGTGCTATTTCTGGATCTGCTGGTCCAACCATTTCTCTGAATTTTGTTGGTGCTTCCTGTGCCCTGATCTCCATAGCAATGCATGGACCTGACGTTAATTCTGATACCATAGAACCATATTCCTGTACTACTCCTTTATACACCTCATAAAATTCTTCAGCATTTGCCTTCTCCATGTGGAATATTTCTAACACCGATATTTCAAAACCTGCCTCCATGATAGCACTGATAATTTGTCCAGAAAGACCTGCTTTCACTGCATGTGGTTTGATGACACAACATGTACATTCACTATATTTAGCAGTGTTCTGTCGTCCAGGTCCAGTGCTGGGGAAGAAAAACTCCACCTCTCTAGCAGCTGATGTTGTACTGTCT…
>EduN_673
TCCGGCGACATCCGTCTTCTGTGACATACTTTGGTGATTGTTCAAAGTGTCATAAAAAATAGAAATCTACGCTATTCTGATCTTTATACAGTGGAACATATTCATGTTCTTGGAGATATTTATCTTCTCCAACTTCGAGAATCTGACCTATTTCTATATGTTTATCAAAAACATCTGTGCACTTTTCAACTCCGTCTACAATAATTTTCTTTGACTCTGGATCTCCTTTCTCAAACGCACGCGTTGTTCCAATACCATATGTAAATCTTGCAACGCGACTAGTTATCGTTCCAGGATCAAACCCGAACAAAACAGCACCTTTTAATACCGCTAATCCCGGATCTTTTGGAATAACCATTCCAATTTTCGGAAATTTCGTTTTGAGAGCTTCGGTTAGCA…
>EduN_675
GCACTGCACTTCCGGTAACTGATGATAAAAGTACTTCTTGCATGACAGAAAAAGGACCCACTTGATCTTCATAGAAGTCAGAGAGAATATTATCCCTTCAGACAAATGCTATTACATTTTTTTAATTATCAGGGTAGAGTATTTGACAATGCAAACCCTATAAATACAGAAATATTTAAATTTCTTTAAAAAAAATACTTTTACTAAGGTCAGTGAAATAACACTTATAGCACTCATAGACTCAAAAATATTAATAACAAACTTAAACTATGATTATTGCTACCATCAAAGAAAAATAATAATTTAAAACATGATACATGTATGGCTATAGATAAAAAAAAAAGAAAAAGCATGACAGGAAATTTGGATTTGTACTTTCTCTGTCAATTTTCTACAGCA…
>EduN_677
GTTGCACGTTTGTTCCTGCAGCTTCTACTTTCCCTCTTTTATTTGTATATCCCTCGGATACTACTTTTTTCTAGCACTAGAACGGGTTAAACCGCGTTTACTGTATGGCAAATCATACCAGCAAAGGTTACTGCAGCCACGTTCATCCGTGTTATCGCCACAGTTATCTTCTCCATCGCACACTGCCCACCATGCAACACACCACTCACCATTATCGCATAAGAAGCGATCACTGTCACAACCTGGACAACCCATATCGTCTTCTCCTCTACTGCAATCAACATAGGAATCACATTGCCAACTCCCCGCAATACATTCTCCGTCCGCACAAGTGTACATACCATCAGAACAACATAAAGCTGATCCAATAAACAACCATGAAAGTTCTAGTATTACTTT…
>EduN_709
TCTCACTGGAAATACAAACATCAGAGAAGTGAACATCTTACTGGATCATATTGGAACATCGTCTAATAATGAGAACTTTCCTGTTGCTTGTCGCCGTTTTCGGCGTAGCACTGTCAGACCCAACTGTTTATTTCCAAGAGGGTTTCTCCAGTGCTGGTTGGACCGACAGATGGGTTGAATCTACTGCTAAGGGAGCAGATCAAGGCAAATTTGAATGGACTGCTGGAAAATTCTACGGAGATGAAGATCTTGACAAAGGTATTCAAACATCCCAGGATGCTAAGTTTTATGGAATTTCCAGCAAACTAGAGAAGCCCATCAGCAATGAGGGAAAAACTTTAGTTATCCAGTTCACTGTCAAACATGAACAGAACATTGATTGTGGTGGAGGATACATGA…
>EduN_737
CCATCATGTTCTTGGCATCAAAGATCTGTTGGGTAAGTTCCGGTACTGTTAGTGCACGGTACTGTTGGCTACCACGAGATGTTAAAGGTGCAAATCCGGGCATGAAGAAGTGAAGACGAGGGAAGGGTACCATATTGACGGCTATTTTCCTGAGATCGGCATTAAGTTGACCTGGGAATCTAAGACAAGTTGTTACACCAGACATGGTTGCGGAGATGAGATGGTTAAGATCACCATATGTTGGTGTTGTAAGTTTCAATGTACGGAAGCAGATGTCATACAGAGCCTCGTTATCGATACAGTATGTTTCGTCTGTGTTTTCGACCAACTGATGTACGGAGAGGGTTGCATTGTAAGGTTCTACGACAGTGTCTGATACTTTGGGTGATGGTACAACGG…
>EduN_752
TTGGAATGTCATAAGACTTATTTACTGCAAAAAATAATTGAGACATTTTTAATTAAAAAATTTACTGATGACCCCATACTCAAGGACAAATTTTGTCATCAAAAGCAAAACAATGTGGACTTTATCCAGACAATACTCTATATATATATGTATTTCACATAAATAAAGATTGTTTCAGTGAATGGATTTCAAATGTTCTTGCATTAAATGATATAATAGGTCGATGAGGTTCAATTATTACATTTAATTTTATTTGATGAATCTTGGAATGAAATATTTTAATCAAAACATATGTTCACCTAGTTAATTTTTTGTCTTAAATCTAACATTGAACTAATTTGTTTGTATTGGGTCATTAAAACAAGCAGAAATTGCTGTGAAATCCATCTAGCACCTGTT…
>EduN_792
AAGTACGCAGGTGTTGAGTATGGGGTCGAATGCTTTTGTGGTGATGCTTTACGAAAGAACAAAAGAAGAAAAGAAAGTGATTGCAAAACTCCATGCTCAGGAAATAAACAGCAGATATGTGGTGGTACATGGAGGATCTCTATTTATACAGCTCAGACATCCAAGTGCAGGAACAAATGCCATAAGAAAGCGAAGTGTAGAAAAGGAAAATGCGTTTGTAAAGCTAAATACCAAGGCGACGGAGTTAAATCTTGTAAAAAAGTCAAACGTTGTCGATCGGCCAAGAGAATCCGAACGCCAAACAAGTATAAATACAAACTACTCTCAGATTATGGCATCAGGGTAGATAATCCTGACAGATATACTATCAAGTTCAAAGTGAGGGCTACAAATGATGCA…
>EduN_817
TTTCACAGTGAACTCCATTATAACCTGGAGCACATGTGCAGGTGTATCCATTCACTTCATCTGTACAGCTACCTCCATTGTCACAAGGTCCAGACGCACATTCATCAATATTTGTTTGACAGTTATTGTCTGTATATCCAGCGAGCACATGTGCAGGTGTATTCGTTTATTCCATCAGTACAGGTACCTCCATTCTGACATGGCTTTGGAGCACA
>EduN_822
AAGGACCAACAAGGCCAAATTCAATGGAGGGTCGGAGCGAGTAGACAGAGGGAGAAGATACAGAGAAATAACCTACAGAGGCTGGAAGAGGGCCATTATCAAAATCAAAACAGACCTCCACCTCCGTAGTCGAGTCAATAAACAAAAAGGTAATGAATGGAGATATACACAGTAACAGTACTCCATGTCCTGCCGCTCCAGATACAGGACAGATCCAGGAACTGGAAGAAGAAAGAAAAAATTACTACAACAACAATTATCTAACATGCCAGAACCTGCCGTAAGCGAAGTTGAATCCAAGAAGTGCCTTGATACAGTTGGCACCTCCAGAATATGACCAAAGTGAATTCGAGATTGACCCTGGAGAATTTCGTTATGAATTGTTATTATCAGATAAAG…
>EduN_831
CTATATAATTACTTTAAGACCTAGAGGCATTCTCAATGTGACATTTTTAGTAACCCTTAAACGATATAGATTTAAGTCTAAACTCTCTTAACATAGCATCTTCTTCATCAGGGTACTGTGTACAGAAGTCGGAGTATACATCTTTTCCTACAATGCCTACCAACAACTTTTTACAGACTTCCCAGTTTGTAACCATAGTATTCAACTGTGTCAATGATTTATCCTCTTCTACCTTTAAACATGTAAGGTCTATTGTATCGCCACTACCAAATACAACAATGTACTTCATTTCTGGTCGAAACAAATCAATCTTGTCGTCTAATATATTTTCCATTGGCCAAAACTTCCAATATAAGGATACAGCTTCAGGATAAGAAGCTACAATTGTGTTCTTTC
>EduN_835
CCATTTGGTCCCTGTGGTCCAGGCTCTCCACGGTCTCCAACTTGTCCAGGTTTTCCAGATTTTCCTCTTGTGCCTCTTCTTCCACGGCGTCCATGACGACCAGCTGGTCCCTTTGCTCCATTTGGTCCTGGGTATCCTGTTATACCAGGCATTCCTTGTCGTCCCTTTTCTCCTTGAGTACCCTGTTCTCCTACTTCTCCTCTTTGTCCTGGATCTCCCTTTGTTCCTTCAATTCCTTCGAATCCTTGAGGTCCATTGGTCCCTTTCAGTCCTTTATCCCCTTTATATCCATAGTCTCCTTTCATACCATCCATACCTGGGCCACCCATGTCACCTTTAATCCCAAGTGGTCCTGTGTTACCTGTATCTCCCTTAATTCCTCTTGGTCCTGGATATCCA…
>EduN_837
TGTATATAAAAACAATAAAAATATCTTCTCTCTGTATATCACAATGGAAAATAAATAAAAATGAAATATTGCACTTTAGAAAATAAAATATAGATAAAATTGTGCTATTTCAACAAAGCATTTCCCTGCACGTCACTAAGCTCTTTATTGCCATAAAAAGGCCACTGTAGACACTTCTTTGACATCAGTACAAGAAAATGAAAACTGTGTGCATGCTTCGCTGTGCCGAGCATTGGTTCCGACCAATTTACTTCAATTTATGACAAAACAAAAAAAATAATCCTTTTGAAATCATGCAGCAAACACGCGCAGTGATACGCACCAGATATGAATGTTCAACAAAAATAAATATAAATCTGTACAATATAAATTAAGGGAAACAATTGGAATTATGTCTCT…
>EduN_854
ATGATTTTCAGTTAGAAAAGGATAGTCTATTGCTCTTTAACGAGTCGATCTTTAATAATATGGTCTTTCCTTGTTCCTCTGAGGATATCCGCTGTACTTTGACGTTTTCTTGTTCCACGGATAATCATATTGTTGGTACCTATAATCTTTTATTTTGTATTTTGCGATTTCCTGTATATTTGCAACCCGCCTATTCTTTCCATACAATTGGACACGTACATTATATTTTCCATCTTTTCCAGGATATCCTCTTTCTCCCATATCTCCTTTCAATCCAGGCATGCCCTTTTGTCCTGTTGGTCCTTTTGGTCCGATATTTCCTGTGTCTCCCATATCTCCTTTCGGTCCAGTCATGCCCTTCGGTCCTATTGGTCCTATTGCTCCGGTATTGCCTTTGTC…
>EduN_865
ATACATAGTATCCTTCATCTGCAACAACTGCACTTGCTAATGGGTCAGTGATGGTGTAGCTTACTGTTGAACCACCATATTTGTTAGTTAAGCTGTGCCCATGTTTATATCTTGGGCAACACCATTAACTATCTTTTACCTAGTAGACTGATGTGTGTACAGGGTTGGCTGATACAGAACATTGGAGTGTAACGGAACTTCCTACATTAACACTATATGTGGGAGCAAGAATATTAACCTGTGGAGCATTTCCTATGACATTCAGGAAGGTACTTTGTGACTGTCCTGTTCCAATACTATTTGTAGCATAACATGTATAATATCCACCATCAGAATTGACTGAGTTACTAATGGTCAGAGATGGTCCATTGACTGTAGCACCACTAAACCTGCCGGTCA…
>EduN_870
GAGATCTCGATATTTTAAATTTGTATTTTATCTATGTTATTTGTGTTCTTCATATATTAACCACATGCATTTACCCGCAGATTTAAACGGATTAACTCCGTTCCCGGACTCCCCTCACAAAATGGCAGAGGTTCTACCAGGGGAAAGGAGTCTGGGTTCGGTATCCAGTGACCACAATGAGCCCCTGGTTAGAACTGGGAGCCCAAACTTTGTGTGTACAGCATTGCCACCGCATTGGAGATCAAACAAAACTCTTCCAGGAGGATTTAAAGTTGTTTCACTTGGGGATATTAAAGATGGAACCAAAGTGACAATTTCAGCTGGAAATGACGAAAATTATTGTGCGGAATTAAGAAATTGTACTGCCTTTATGAAAAACAAAGTGGACTAAATTTAATG…
>EduN_873
GTTGAAACACAATTTTATTTAGAATTTATGATATTAGATAACAATTACAGAAATCTAAGACATTTTATACAAGTGAAACGAAAGGGAAAGGTCTATTAACACAGATCGAATCAGAATATCACTCCGAAACAGAATGTGTATCAACGTCACTTTATAAGGCCTTCTCTTTACATTCCAGTTTCACCTTGTTCGGTTTCTCCTTTCTGCATGTCCTGGAATTGCTCATGGTCATTCATCTGTGCTGGCATCTCAGCTGGTCCTTCACTTTCAGGGGAGAATTTCATGGTATGCTCGCTGGAACAACGGAGACATCTGCAATAGCAAAACCATCCATATCTGACTGACACGTAATATCTACAGCGTCTGGCTCTACAACGAGATTTACATCTGGAAGCACAG…
>EduN_909
CAATACTGTCTCTGAGGTAGTGTCATCTTTATACCAGGTCCGTCATCGGTTCGCAGATGCAGCATCCTTTAGCCCTATAACCATCCTTACATTTCGGGGTAACAGAGTTCGGCAAGTCTTACTTCGTTACTACGACAACTTTGCCTTTGTCTTAGAGTTTTCCGTATACCTGGACCGCCATTCGGTGTACAAATACAGCATCCACTTGCATGATATCCCCCTCTACATTTTGGATAGCAAAGACGTCCATTCATTTCTTCGTTCGATCTACATCCCTGTCGTTGGAAGAGTGTCAGCTTTATGCCGACATCTGTTTTTCTGCACGTGCATCCATCGTCATGATAACCACTTGGACAGTTGTTACAGCATCCAAAGATTGTGCAGCAACATCCCTTTCCA…
>EduN_930
GGGGAACCTCCACAGAAAGGATTACATGGAATTACATCAAAACTTAGACAAAAACTGGCTGGAGACTGGAAGAATATACGAAGGGCTTTCAAGAAGTTAGATAGAGCTAATGATGGGTACCTCAATGTGAATGAGTTCAGGTCCGTCTTGAAACTTGCTAACGTCATTCTAGATGAAGAAGAAGTTTACCATGTATTGACACAGTTTGATAATAACATGTCTGGAAAAATATCTTATGAAAAATTTGTTGACGAAGTACTAAAACCTCCAACTCGACAAAGTGTAAAACAAATTTAATAAGTGTTGCTAAATTTAACATAAACTGTATTTTTTTAATCTTTGTAAGTGACTCAACTTGGAATTTGTATATGAGATGTTTGACTTTTGGTTGAATGATGC…
>EduN_941
TTTAACTGGTATATTTGGAAATGCGGAACTTGGTGGTCCAACAGGTCCAACGATGGCATGTGGACTATTTCTCATCTGCCTATGGTTCTTGTATGTTCTGTTGTCATCATTACAAAGTTATGAATATATTTCGGGAATATAAACTTTATTTCAACTACTGACTAGTATATCAAATTGTTGTAGAATGTGATATTGTTATTATATATTTAGTCGTTGATTTGGTTTTAATGTTACATGTATATATTGATAATGTTCTTTCCATTAACAATCCAAACTTTTCTGATTGGCTTCCATTAATATATCCTGTATACCTTAGAACTAGAAATTTAAGACATATGATTAGACTTATACCTCGAAATTAAATTACACGGCCATCTATGTACCTAAGAGCTTGCAGAT…
>EduN_954
CAATAGGATTGTTCGAAATCGTGCTAGCCGATAGTAATCGATCTATAGACCAAAAGAGTCCACCGTTACCAAATGAAGCACATAGCCCATCCATGCCACATTCAAATTCTCCTAACGGAGATGCCATGCAAAGAGGAGGAACCTACTCAATAACAGGAATACTTGGAATCCCACACCAACCACCTCAGAACATGACAGACCCAAATGCCATCAAAAGAAAAAGGGAAGAACAACAAGTCAATGGACAGCACGAAATAAAAACAGAACCACCAACTGATAACAACCTTGATATGTGGTATGCAACAGCCCGTCCTCCATTAAAAATTGCCAGACCCGAAAATGGCAACTTGGATGCACCCCAAATTCTGATGAATGCAGCAAATGCACAATTATTTAACA…
>EduN_956
GAACCTGACTACGAGGAACACGAGGCGACGATGAATTTTGACTTTGTCGAAAACAACGATCAGCCAATTCCACCACCGCGGCGCAACCGGCGTAACCGGAAGGTAGTCAAAGAATACGACGGAGAGGATTTCTCCCAATATATGGAAGACGATGATGGCTTCCATGAACAGCCTTTTACTTGGAGGAAAAACATCAAACATGCAAGGACACCTAATGCTAAAACTAAACAACCACCGATTCAAAAATCAAAGTACTCGGAACGTTCAAAGATGAGCGCCCCTAAACTAAAGCCTGTTAAAAAGCCAAAACATACCGAGACGCAACACGGTAGTATGAAAAGACAAACATTACGAGATATAACCTATGCTGATTGTAAAATGGGCGTAGATGATAGGACT…
>EduN_973
GATCTGACCTGTGTAACTGAAAAGGCCTCCAGAAGGTTAATGTCTGAAGTTATGTTACACTTAAAGACATTTGAGATTTCCTGCAAAACGAAATTCTGGTTGCCGTTTGCTATGTCTATCACCTCCATTATCATACTTGCTATAATAATAACCGTCGTATTTTTTCGATATAAATATGCTGTTGAGTACCTTTTATTGAGATTCAAAATGAAAATGAGAAATTACAAGGAACTGACACAGGAATATACTTATGATGCTTTTATATCATATAGTCACACAGATTCGGAGTGGATTAAACAGTTCCATGACAGAGTAAATAGTATGGGATTCGAATTATGTCTGGACGCCAAGGACTTCATTGCTGGTGAAAGTATAGCAGTAAATGTACTAAATGCAATC…
>EduN_976
GACGAGGGAAGGGTACCGATATTGACGGCTATTTTCCTTGAGATCGGCATTAAGTTGACCTGGGAATCTAAGACAAGTTGTTACACCAGACATGGTTGCGGAGATGAGATGGTTAAGATCACCATATGTTGGTGTTGTAAGTTTCAATGTACGGAAGCAGATGTCATACAGAGCCTCGTTATCGATACAGTATGTTTCGTCTGTGTTTTCGACCAACTGATGTACGGAGAGGGTTGCATTGTAAGGTTCTACGACAGTGTCTGATACTTTGGGTGATGGTACAACAGAGAAAGTGTTCATTATTCTGTCTGGGTATTCCTCACGGATTTTGCTAATCAATAGTGTTCCCATTCCAGCGCCAGTGCCGCCACCTAGTGAGTGAGTAAGTTGGAATCCCTG…
>EduN_977
GAGCCTCGTTATCGATACAGTATGTTTCGTCTGTGTTTTCGTACCAACTGATGTACGGAGAGGGTTGCATTGTAAGGTTCTACGACAGTGTCTGATACTTTGGGTGATGGTACAACAGAGAAAGTGTTCATTATTCTGTCTGGGTATTCCTCACGGATTTTGCTAATCAATAGTGTTCCCATTCCAGCGCCAGTGCCGCCACCTAGTGAGTGAGTAAGTTGGAATCCCTGAACACAGTCACAGCTTTCTGCCTCTTTACGTACAACATCTAGAGCAGAGTCAATAAGTTCAGCGCCTTCTGTGTAATGTCCTTTTGCCCAATTGTTACCTGCACCGCTCTGTCCGAACACAAAATTGTCTGGTCTGAAGATTTGTCCAAAAGGTCCTGATCTGACGGAG…
>EduN_1001
TCCGGCCATTTCTACAAACTGTGGTCTTCCATCAATTACCTCTACATCTCTACTTCTAGCCACTTCAACGAAATGTTCTTGTTTTTCCAAGGTTTTATCAAGTCTGTCATCTGTCATACAAAACTATGCGTAGTTTTCCTTCCTCTTCTCCTGTACGTTTAGCAAAACAAACAAATCTGGCCATGTATGGGATAGTAATAGCTTCATGATATAATTCTGTTCCCATCCGAGGGGCATCAGCTAATGTTTTGACAGTCCATTAGCCAAAACCTTCCGGACACACTAGTGGTAATGGAGACACAATCTTCTGAAAACTTAATGTTAGCAGTCTTTAGTGTAGTCTTCCCATACAGATACATCAGTTCCCTCTGCTATACTGTAGAGTACTCTGAGTGTCGG…
>EduN_1001
TCCGGCCATTTCTACAAACTGTGGTCTTCCATCAATTACCTCTACATCTCTACTTCTAGCCACTTCAACGAAATGTTCTTGTTTTTCCAAGGTTTTATCAAGTCTGTCATCTGTCATACAAAACTATGCGTAGTTTTCCTTCCTCTTCTCCTGTACGTTTAGCAAAACAAACAAATCTGGCCATGTATGGGATAGTAATAGCTTCATGATATAATTCTGTTCCCATCCGAGGGGCATCAGCTAATGTTTTGACAGTCCATTAGCCAAAACCTTCCGGACACACTAGTGGTAATGGAGACACAATCTTCTGAAAACTTAATGTTAGCAGTCTTTAGTGTAGTCTTCCCATACAGATACATCAGTTCCCTCTGCTATACTGTAGAGTACTCTGAGTGTCGG…
>EduN_1004
CATTTCTTAAAGGCGGAAATACATACACGTCTGCTGGCATACAGCGCATGACTGGAACAAGTTTTTCTTCGTCTTTACGGGGGGAAGATCAAATGCACCTAAGATCGGGATAATCATAACGGACGGAAAATCAAGTTCTTCATCTGCAACCATTTCTGCTGCAAATGCTGCAAGAGCAAATGGAATCAAACTATTCGCAATTGGGGTTGGTAGCAGTATTGATAGTTCAGAACTGAGGGGTATCGCTAATGATCCGGATAGTGACTTTTATTTCAAAGTCAACGATTTCAGTGCATTGAAATCAATTGAAAGCAGTCTTGCATCGAAAGCGTGCACAATTTTCACGCCAACACCTACTGGTTGCAAAGCTGGAGCGGACCTGGTTTTTCTTGTTGATAA…
>EduN_1013
CGAGAATCCCGCCATCACAATTCCGCTCACTCATTCATTTCACCTGATTTTCAGGAGATTATCAAGTATGGCAAACCCAAAATGTTTTTTCGATATGTCAATTGGAGGCAATCCAGCTGGTAGAATTGTTATGGAGTTGAGAGCTGATGTTGTACCAAAAACAGCAGAAAACTTCAGAGCTCTCTGCACTGGTGAAAAAGGTTTTGGATTCCAAGACAGCAAATTCCACCGAGTAATCCCAGGATTCATGTGTCAAGGTGGAGATTTCACCAGAGGAGACGGAACTGGCGGCAAAAGCATCTATGGCAATAAATTTGAGGACGAGAACTTCAAGCTGAACCATACTGGTCCAGGAATTTTATCCATGGCAAATGCTGGTAAAAACACCAATGGATCACA…
>EduN_1026
GAGCAACCAGTACTCTGTGAATATTGGGGCCGAGTAGAACTCTTGAATGTACTGTGACAGCATCACCCACTCATAATAATGTATATTGGCAGAGAAACATCAATGGGGTATCTACCACAATTACTATTAACAACAATAAATACAGTGGTTCCACAGTTAGTAATCCTTCACTGACCATTAATAATGCTGATAATAATGATGAAGGATTTTACATTTGTTTCGCTACCAACAGTGTAGGACTTGGACAGAGTGCCAACACATTCTTGGATGTTCTTGGAAGTACACCTTCTGTTGTCGTACCTCAGCCTACATACTCAGTTAATTTCGGAGGAACTGTAACTCTTACCTGTACAGTATCAGCCAATCCTGCACATAACAGTGTATA
>EduN_1071
GAACGCCCCACTTTGGCAAGCATTTTACTGTCGATCGGGAAAATACCACGTGACCAAGTCACCATTGGGGACACATACACATAGGCTATGTTTAAAAAAAAAATGATAGACCGTCAAATATTTTGTTCATTTCATATTTGTATTGAGCCGGTTAATTTAAACTTGCTGTAAACATTTGCATCTTTGTAGGTGTAGGATCTGGAGGTATAGTGGATATGTTGAAGAGTAATTTGGATTCAACAGACGTAGACTGCAAAAAAGAATTTATTATGTAATGTCATTCTGTCAGGAGCAACTACTATGTTCCCTGGTTTTCCTGAGAGAATTAGGAAAGGAATGGAATCTTTTGTTACCAAAAACAACGAAAGTGAAAGTGATAGCTAACCCAGAACGTAAATC…
>EduN_1099
GATTTGTCGCCCTTATTGTCATTCGTATTGGTCTTATTCAAATCAGTATAAAACATGTTCCGGGGTGATTAATCTGACTGAAGAAAAACCTAAGCTGTACGGTGAGGTAACATGACTACTGTATGAGTCTGGAAATGGGAAGGTTTTTTCCAGAAGGGATAAAAATACATTTCTCAGTTTCTACTGCGACTTCCATGAAATTCCATGGGGAAAATGCTAATGAATAAATTTGTGACGACGCTTAGTTTACATTGCATATATATGTGCACATATACTTTCTTCTGGCACTTGAGAAATAGGGATGAAAACCCGTACATATAAAAAATTGTATCTAAAAGGTACAAAGCAAACAAAATAAAATAGTTAGAAAAAAAATACGAATTACACAAATCTTTCTAA…
>EduN_1103
TAGATATCCATCAATGTAAGAAGTTTTTTTCACATCTTTGACAGATGAAAGACTGTGCGGGTCCGGATATCCGCTTTGCAGGCCTGCCGAGAAAAGCACAACAATCCGAGGGGAGCAAGCGAAGACAAGCGACAGAAAAAGAAGAGTCTAAGATTTGATTGATAAAAATATAAAAAATAAAAATTTATATATTTTTCTCAATGATATGAACTTTTTACCACAGGCATGGAAATAATTATAGGTCTTGAAAGTTTGTTCCATGCATTTCTCAATTTAAAACGACGTCGTTTAAAGGTCTTTTGAATGTCACTGAGCGATGAGATAGTCTGAGGTGATTCTATTCGTATTCTGGTTCATCGGTTCTTTTTTTCCGTTGCTTCCTATTTGTTGACGGAAGGT…
>EduN_1120
ATGGCACAACCTGCAGGAGGATTTCCACAAGGTGGTGGTTTTCAACCAGCTGGGGCCTTCCAACCTCCACCGCCACAGCCTTCAGGATATCCTGGTGCACCAATGATGAACCCGCCTGTACCACTTGTTACACCAATCCAAGGAGGATTATATCCCGGAAAAATGATCAATATAAGTGGTGTACCAAACCCAACAGCAACTAGGTTTACAGTAAATCTACAGTGTGGTGCTTATGAAGGATCAGACATAGCTCTTCATTTTGATGTTCGATTTCAAGCTGGTGCAGATTACAACGTAGTCGTACGTAATTCCTGTCAGAACGGAAGTTGGGGTGCAGAAGAAAAACAACTACCATATTTCCCTTTCATGCCCAATGCTAGCTTTGATATGATAGTTCTT…
>EduN_1139
GCGGCTGTAGATGGGATGAGTGGGAAGCATGGAGAAATTGTAACAGCGAATGTAATGGTAAACGCAGACGGACAAGAAAAGTTTGGCTGTATAAAAACAAACCCGGATGTGACTTCGAATTCAACACATGCGCTACCAACGACATGGGATCGGACTACTCAAGATGTAATACCTTTTGTCACAACGGAGGAACATCGAATAGCTACTACTGTAGCTGTGTAACAGGTATTTTATGGAACATGCTGTGGATTACAGGTAAACTGTGGAAATCCTGGATCTATATCAAATGGTAACTTAAATGGAGGAACCTTCACCTATGGTAGTACGGTGACGTATACCTGTTATAGTGGATACTTGTTGGTGGACGGAACTTCTAGTAGAAAATGCGAACTGAACGCA…
>EduN_1140
GGTTTTTGCAATTTTGCCGGGCTTTCTGCTAGCAGAAGATGCCGATTCTCTCTCTAGAACAAAGAGACAAGATGATTTCCAAGTTGACGGTTTCTTTGAAACTTTTGGCTATATGGATGTCCCTAAAAGTTCCCAAGGCGGCCACGATGCAGCCGACAGAGAACGAGCAGTCAGAGAATTTCAGAAAATGACTGGACTACCAGTAACTGTTTTT
>EduN_1142
AGTAGTAAAATAGTCAATCCTCTAAAGCAGTGGACAAACCAACCTTACATGTCAAGGAGCAGTGTGTCCTACAGCAACTCAAGTACAGAATGCTCAGAGAACAATTAGTGTCTGGTGACCTTACATCATATGCTTCTATCATAAGATACGACTGTAATGATGGATACGAATTAGTTGGGGGAACCCATTTTATTTTGTCAATCAGACAATCAGTGGTCAGCTAGTTTACCATCATGTATAAAACTAAGCTGTCCTTTGCCAGAAATCATGAATGGTCAACTTTCACAATCTACATTTCCACAGTACCAG
>EduN_1223
GTCCAGATATTTATGATAAGGTTGTCATTGATAATCAGTGCACACGGTACACTGATGTTTCTTGTGCCTACGAGTGCAAGTCTGGATTTATGAAGAACCCTGATGTAACAGCGATTAAGTGTTTACCTCATGGCTCGTGGGAGATGGAAAGTGACTCTCTGTGTACCCGAACAATCTGCCCGAAATGCAATAACCAACGGTAACCTATCAAGCATATGTAACCGGTTTACTGGAACCAAATGTAGTTTTACCTGTGGTGATGGTTATGACAAAGTAGTAACAACATTGGAATGTCTTGCAAATGGCCAGTGGAGCGAAGATACAACGTCTGTATGCATGTTAGGTAATACTGATACAACTAATGATGGGCTCAGTACCGGAGCAATTATTGGTTTAGCC…
>EduN_1249
TGAATATTTCCGGAAAAAATCTGTTGTCTGTTATTGATGATACTTGCATTCATCTCTTTTCTTAGTGTAAAACATCTTAAAAAACATCTTCAACCTGAAGAAAAATCCATCACCAGTCATAAATTTCAAATAAATCAACTCGGCTTAAACATCATTCTGGTAGTTTTGAGTCCAGATTTCCCTTTCCAGCTATTCCAGTGCATATTGGTTTCACTAGAACCTTCGAGATACAGTCCGTTGATATTTGACCATGTACATCTAGCATGCCACCATGGGCTCTAGTTTATAATAGCACAATTACTACTGGTTACATCGTTATCTCTGT
>EduN_1257
AAACAATATAGTCTTGGTCAGAAGTCTTATTATCTTGGAATCAACCAGTTTGCAGATTTGGAACACTGGGAGTATATGCAACATCATGGATTCCAGGTCAAGAAAACAGTCAACAGAACAAGCACAGGGTCAAAGTTCCTCCCCCCTCTCAATGTTGTTTTACCTGAGAATGTAGATTGGAGAGATAAAGGATATGTAACACCAGTCAAAAATCAGGGACAGTGTGGTTCATGTTGGTCATTCAGTACAACTGGTGCTTTGGAAGGACAACATTTTAGAAAGTCGGGTAAATTACTTTCTCTCAGTGAGCAGCAATTGGTTGACTGTTCTGGTGACTATGGAAACGAAGGTTGTAATGGTGGTTTAATGGATGACGCATTACAAATATATCAAAGCTGT…
>EduN_1317
CTTCCAGCTCGTACAGGGTATCATACGAATCTGTATGCATGTAATGATTCTTTTCTACAGTCAAACCAACAGCTTGTGATTCATCCAATCGTGATCCAATCCCAACTACGAATATGTGAATCTTCTTAAACTTAGCCCTCCTGGATTCCAGTTCAGACTTGTGGAATTCTTCCTTGCTCAGTGGTCGACTGAGAAAAATGAAACCGTACCTTTATACCTTTGTCCGATTGGATTTTCTGTCTCATATCTCGCAGTATACTTTGAAACGAGGCTGATGTCATTGTGTCAAGACTGTTCTGTAAAGATTTCTGGTCATGAACATGGTCGATAAGACCGCCATCTTGTGATTGGAGGCCACAAGAACTTGTCAGTACACTCAAGCTGATGTGTTGCTTGTCC…
>EduN_1336
TGCTTTTCTGTGAATCTCCAGAACCTCCCTTGCTAACGATCATGTCAGAAAGCAGTTGAGCTCCACCGCTTCGTGATCCACTGGAATGCTCAACAACACGTCTCATGTTGGTCTCCTCAGCTTCCAACAGTTTCCTGTAAGCAGCAATCTCCAACTCCAATGACAACTTGGCGTCTTGGAGAATTTGCAGTTCTTGTAGGACAGTATCCATCTCCATTTGTAATCTCTCGATACTAGATTGAAGTCTTTGAACATCAGACTCGTGTTCGCGACATTCATCATCATACTGGGCCTGTAGTCCGTCCAGTCTTGACTTAAGCATGGCATTCTCAGCTTGTAACTGACTGATAAGTGGTTGTAGCTCGTTCAGTTTCCTTTGACCTTCTTGCTTTCCTCCCG…
>EduN_1338
AGCTGACAGAGGGGAACGACAGTTACTTGGCTTGGTATCAATCATCTTGCTGATATGTCGATTGATGAGGTGATCGAGACAATGACAGGTGGAATGATATATAGAAACAGCAGTGAGGGTTCCACGTTTCTACCGCCTAATAATGTGGAAATCCCCAGTGAAGTGGACTGGAGAAAAAAGGGATATGTAACTCCTGTGAAAAATCAGGGAAAATGTGGATCATGTTGGGCATTTTCAGCTGTAGGATCATTAGAGGGTCAGCACTTCAGGAAAACAGGGAAACTCGTATCGTTATCGGAACAAAATACTGATGGACTGTTCGTCAAAATACGGTAACAGAGGATGCAATGGAGGTATGCTACCTCCTTCATTTAAATATGTCATAGATAATGGAGGCAT…
>EduN_1341
ATTGCCCCACCAGAGAGGAAATATTCCGTCTGGATTGGAGGATCTATTTTAGCCTCACTTTCTACTTTCCAACAAATGTGGATAAGTAAGCAAGAATATGATGAATCCGGTCCAAGCATTGTACATCGCAAATGTTTCTAAACATAGATCTCTTAATAAGACAATCATTATCTTTTTATCAAGCATTGTATGAACTTGTTTCAAACCATGAACAACTCTAAGACTTTTACTTTGCTATTTGCTATAAAAAATAAATTGTAAACAAATGTATTTGATGGTATTTTTTGAATACAAAAATAAAATTAATCTAAT
>EduN_1344
GGACAATCAAGTAAATGTGTGACCATTCCACGTTCTTTAGATGGTAGACTCCAAGTATCTCACAGAAAAGGACTGCCACATGTTATATACTGCCGTGTATGGCGATGGCCTGATCTACAGAGCCACCACGAACTGAAGCCCTTAGAATGTTGTGATTTTCCATTTAGTGCTAAACAGAAGGAAGTGTGTATTAATCCTTACCATTACAAACGAAGTAGAAAGTCCAGTGCTACCCCCACGTGTTAGTCCCAAGGTATAGCGAGTACCCATCCGGTCCAGGCCAGTCATCCTTACCACCTTTCCAACAGTCACCGGAACCTTCTATGCCACAGAATGTTAGCTTTGATCCAAATGGCTTCCACCAACAGTCACAACAGGGACCACATTCACCTGCTAGTT…
>EduN_1373
TTTTTCTGAATCACAAATGCTGCAGGAAGCAATAAAGTCGGCATTTCAAAGCAAAACTGTAATAATACCAGAAGATGCAGGTCTTGCTGTGCTCAAAGGTGCAGTTCAGTTCGGATTTAATCCAAAGGTTATAAGTCCAAGAATCATTCGATACACTTTTGGATTCGGTACAAATATGCAGTTCCGTCCACATACTGACCCAGAAGATAAGAAACTATTTTACTAATAATAAGATGTATTGCCGGGATAGATTTGGAAAGCATATCGGGAGAGGAGAACCGATGGAGTGCGATGGAATTTAACCAATAACGAAAACATACAATCCAATTAAAAGAAACGCGAAGTAAAATTGTACTTCCTCTCTATTCGTCTCGTTCTGATGACTCCACAATATATCGA…
>EduN_1392
CCTGGACCTAAAGGAGAAAGAGGTTTCAATGGAAGAGACGGAAGTAAGGGAGAGCCAGGAAGAACATCAGAGGGAAGCAAAGGGGAACCAGGTCTACCAGGCCGTTCTGGATTAGATGGTTTACCAGGAATGAAAGGAGATGTTGGTTTTCCTGGTCGGGATGGATTCCCAGGTGCTAAGGGTGAATCAGGAATTCCTGGACTTGAAGGAATCGGACAGAAAGGATCACGAGGATTGGATGGATTACCAGGTAGTGCTGGTCTCCGTGGAGAATCTGGTGATGATGGATTACCTGGGGTGAATGGTCGTAAAGGAGAATCAGGAGATAGAGGTCTCAATGGTTTACCTGGTCCTCAGGGTAACAATGGATTGGATGGCCGTAAAGGTGAACCTGGTATT…
>EduN_1398
TTCTGAGTTCATTGTTTCTTTTTTCTTGTTCTTTTACACACATTTATCGGTTTCACAAATATAGTTCTTTTTGCTTTTACAGTCGGTGTTCTTCCAATAACCGTAGTCATGACTATAGAAATATACACACCTAGGACTGCTACTGTATTTCACAGGATATCCTTTTTTAAATTAGTATACTCCATATTCTTTTTTCATGGGCCCACCTCCACGTATATTTGTCTTTCGAAGATAAACCTGTCCAGTAGTAGGAACCACCTTTTTTTCTTGCACGCTCGTTAACCCAAGTGTTCTCTTTTTCATTATCGATTTTCAATAAATAGCCATTGATCTCCTTGCATCTTTTCTTGGCTTTTTCCCATGGTAACTTATCTTTAGAGAAAATATAACAGTGTC
>EduN_1421
CCTCATCTGCAGAGTCTACTGAGACAATAGAAGAAACAAAAGCTTTGTCAATATCTGTACCAGCAGGTTATAGTGGTAGGAGGGATAAGTTTATATGTAGGAAACCTCACATGGTGGACAACAGATCAAGATTTAACAGATGCCATAGCTTCAGTAGGAGTCACAGATTTAGTGGAGATTAAATTTTATGAAAATAGAGCAAATGGACAGTCTAAAGGGTTTGCAGTAGTGGTAGTTGGATCAGACAACTCTTCTAGGTTGATATTTGACAAACTACCAAAAAAAGAAATCCATGGCCAAGTTCCACAGGTAACAAATGCTAACAAACAAGCCCTTAGTCAATTTGAAGCCCAGTCAAAGAAAGATGGTGGACCTCCTCAAAATGGTAATTACAGTCCC…
>EduN_1423
GAAAATAGAAGCGCATGAAAACTAGGTACTTCTTCCGCAGATTTAAAATAGCAGTTATATAGAAATCATGAAATACCACGTGATTTAACAATTGAAGATGATAAGGGTAAACATTTGCCTGCTTTAACGGTAATTTCAGCATGTATAAATTACTTGAGAGGCCATTTAATGCAACAAATTATCAAAAAGACCTACCTGTTAAGAAGACTGAGATCACATGGGTTCTTACAGTACCAGCCATATGGTCAGATCCTGCCAAACAGTTTATGAGAGAAGCTGCAGTAAAGGGAGGCATCCCCAACAGCCAGTTGATGTTGGCCTTGGAACCAGAAGCTGCTTCTAT
>EduN_1431
CAAAAGCATCGACTTTATCAATAGATTTATCAGCAAAGTTCCTATTGGTCGAAATGATTTCCAAATTGGTGTTATAGCCTTTAACATTAATTCCACAGTACTGTTTGATCTCGATGATTACTCATCGGCTACTGTTATGAATGCTGTTTTGAAGACAACCAAGGGGAGAAAAAGCCGCAACGTACACATCCATCGCCTTACGACAAGCTCGGCAGATGATAACAAGCTATTCTATGGGATCACGTCGAACAACAAGCTACATTATTCTACTACATGACGGTCTATCAACAGACAGGAACGAGGCTTTAGAAGAAGACAAAGAAAATAAACGCAATGGGTATACGTATTCTATCAGTCGGAATCGGACAGTCGATTGCATATACAGAGATGTTGACTATT…
>EduN_1436
GGTACTCAAGGAGAAAAGGGACGACAAGGAATGCCTGGTATAACAGGATACCCAGGACCAAATGGAGCAAAGGGACCAGCTGGTCGTCATGGACGCCGTGGAAGAAGAGGCACAAGAGGAAAATCTGGAAAACCTGGACAAGTTGGAGACCGTGGAGAGCCTGGACCACAAGGACCAAATGGTGAAAGAGGAAAGCAAGGAACACCAGGTCCCTTGGGACCAAAGGGAGATTCAGGTGTACCAGGTCCACCAGGTTTTACGGGAGAACAAGGAATCCAAGGGCCTCCTGGACCACCAGGTTTGATGGGCCCCTTCGGTCCACCGGGATTACCAGGAAAAGAAGGAATGTTTGGACCCCCTGGAGAAAGAGGTGAATCAGGTTCACCAGGAAGGCCAGGT…
>EduN_1441
GTTTTGTTGACTCAGAGACAGTGCATAAGCTGATATTGCCATATGAAATACTTCCTGGGATTCACCAATTTCTGTAGCTCTCTTGGACAAATACTCTGATGCTCTTTGTGCTGCCTTTGTTATACAACTCTGGGCATCCCCTGAAGCATCTTTCAATTTATAAAGTGCAATAAGAACATAAGATGTTAAGGGTACTGGATGTCCCATCAACTGTTGGGTTTGCATCTCTTTAAGATGTCCATAAGTTCTGTCATAAATAGGAGCTTTGCTTTCCATAAATTCCCCAGTGACATTGTTCTGTTGACTACAGAGATACAAAGCTATCTTGTTCAATAACTCAATAGGGATAAACATGTCTTTCTCCCACTCTCCAAATCGAGCTTCCTGAAACGTTTTGGC…
>EduN_1455
ACAACAAAAGAACAAACTAGCAGACTAACAAAACAAAAGAAAAACTAAGAGACTGATCATCAGCAACTTTATAAACCAAACTACCTTGTAATCTCTATAGTGCTTTACATCTGACACTTGTCGTTTTGGTCATGAATGTACACATTTTATAATAAATATAATTTGGGCAGGTCACATTCGAGGAATATAGCAGCACAATACTCTAAGCGGAATAACTCTGGCTTGGAATACAGATCTATAAGCTAGTAAGTAGTTGGACATAAAATTTTAATACATAATGGATGATTTGATGAATGGAATAAGTTCGAGTATATTGTCTTTTTGATTCACTTGCAGGAACAACCAGGTGCACATTTACACGTTGAAGGTCCTGTACATCCTTTGCCACACTCACAGCTA…
>EduN_1492
GGATTCTCAGAGTCTCCAATGTTGAGGGATGCAGTGGAAAAGGGATTTCCTGGGAAAACTATCATTATTCCCCAGGAGTCTGGTTTAGCTGTGTTAAAAGGGGCAGTACAGTATGGATATGAACCAAGAATTATATCTACGCGTATTTGCAAATTTACTTACGGTGTGAAAGTAACTAGAAACTTTAAAAAGGGTGACCCCGAGAGTAAGAAATTTGTTGTTGACGGAACTTTTAAATGCAACGATTGTTTTAGCAGGCATGTTGAAATAGGACAGGCTGTCGATATAAATGAAGCTTTCGAAGAACAAGTCTATGGCACGTTATATGCTGATCAAACTGCAATGGGTGTCTCAATCTACACTTCAACTGAGAAAGATCCACGTTACACGGATGATCCG…
>EduN_1519
TAGTACCAAGAGCTGCATGCGAATCTACATGGAACATGAACTTCTGATCAGGATCATTGGCTATTCTTTTAAGTTTCAGTCTGGTCCACCTTTTTACCGATTCCTACAGCAAAAAGATGTATTCCAGCATCTCGGCATAGATTTGATTCTTTTTTAGTTCTGAAGAGGCCTTCTGGATACACCATCTGTCAACACAATGGCTAATTTTACCGCTCCTTCTCTAGTAAGTCCAGGGCCGAAGCCATATTGTCGTATATAACGTAGAGAGTCAGATGTATTGGTTCTTCCACTGACGTATTGAATTGCGTTTACTTGACGTTTAATTTGCGATTTTGAAAATCCAGAATTGATCATGACTATTGGATGAACCTGGGTACTATATACGACCACACCAACTCT…
>EduN_1535
GTCTTCAATCCTCCTCGTCCGAGACTTCTTCATTTCTTTTAATCTTCTTCCTGTTGTGTATCCTCTTTATTCTCAGCATTAGCTTCCTCTTCTTTCCTCTGTTCAGCAATGGCCTCTGCCTCAGTTCGTTCCTCCTCCTGATACTCCTCTTTGTCTAACCTCTCTAGTTTACGTAGGGCAATCAATACCTCAATTCTATAGTCATCCTCCTCTGTACAAGGGTTCTCAGACAACACCATAGCTCTGAGGAGAGGAAGGCATTGCAGTTTAGGTACCTCTGTTTTAACCTCCATTACACTGTTCTCTCTAAGATTTATATACTGTAACATTTGTAGACCATCAGTGAAACCATCCAATGTTTTGACCTGATTCCCTCTCATATGTAATGTCGTCAGACTG…
>EduN_1547
ATACAGTCCGGTCGCAACAGATTTGAAATAATTAAAGAAATAAGAAATCGAACAGAATTTGGAGATGGATTACAAACTGATGATAGGTATAAAGTATTTACCAATAAGAAAACATCACCGACAGAAAAGAGCTACAGGATCGAACCAAATAGAACTCTTGATTGTTTGTGACTATTCTATTTATGATTATTGGTACCGTCTAAGTAAGGCGTCAACAACTTCTGAAAAGGAAACTGACGCACTAACATCCGTCCGCCAATATTACGCATTTGTTATAAATGGGATGGATGCTATGTATAAAAATATCCAGACAACTGAATATACAATATCAGTCTTATTTGCTGGGATAGTTATAGCACAGACACAAGATGACGCACCATGGACCGAAAATATCAAAAA…
>EduN_1562
AAATGAGGGAAATCGTACACATTCAGGCTGGACAGTGTGGAAACCAGATTGGTGCTAAATTCTGGGAAGTCATCTCAGACGAACACGGAATTGACCCCACAGGAACATACCATGGTGATTCAGATCTGCAATTAGAAAGAATAAATGTATACTACAATGAAGCTACAGGAGGCAAATATGTACCACGTGCAATTTTGGTCGATCTTGAGCCAGGAACTATGGACTCTG
>EduN_1583
TAACCCAGTCATGGTTCCGTAGATGGTCTATCGTTTGTTCTACGAAGATTGTGGATGCATACATAATTTTGAATCTTTCATACCATATAAGTTAGCTCCAATGGTATCCTTTAGTTTCAAAGTAGAAATCTTTACAGCAATACCAGCTTCAACTTGTAGTAATCCTGTTCCACTGTGGATGTGACCAACGTACAAAGGTGTTTTAGTAGGTACTGCACATGCTCTGTTCTCTACATGGATCACATCTAGGTCAATATTGTCTATCTCTGTGCTGTAATCACAGCTGTTTTCATCACCTCTGCCTAAATTATCTATCCATAACTCCTTGTGCATGTTGTTAGCAACATGTGACTGAACATAGACGGTACCTGGACCACCAGGGTAGTTAGCAGTGCCACC…
>EduN_1611
ACTCTCTCCACTATCACACTGATTGACATCAGCATTGTTCTGAAGCAACAGTTCTACTATATCTTTGTGTCNCCTTTACTGCTACAACAATGGAGACTCTCCTCCCTTATTACACTTATGGACATCAGCATAGTTCTGCAGTAACAGTTGAACTATATATATATGTCCTTCTTTACTGGCTACAAACAATGGAGACTCTCCTCCACTATCACACTGATTGACATCAGCATTGTTTTGCAATAAAAGTTCTACTATAATCATATGTCCTCCTTTACTGGCTACAAACAATGGAGACTCTTTTCCACTTTCACACTGATTGACATCAGCCTTGTTATGCAGTAACAGTTCTACTGTTTCTGTATGTCCTCCTT
>EduN_1618
ACTCCTGTGTTGGAGTATTCCAGCATGGCAAAGTTGAAATCATTGCCAATGATCAAGGAAACAGAACAACCCCAAGCTATGTCGCCTTCACAGACACCGAAAGATTAATAGGTGATGCTGCCAAGAACCAAGTGGCAATGAACCCAGTCAACACAGTTTTTGATGCCAAGAGGTTAATTGGTAGAAAGTTTGATGACGCTACAGTACAATCCGACATGAAGCATTGGCCTTTCACTGTTGTCAATGATGCCACCAAACCTAAAATTACAGTAGACTACAAAGGAGAATCAAAAACATTTTTCCCTGAGGAAATTTCATCAATGGTGCTTGTAAAAATGAAAGAAACTGCAGAAGCATATCTTGGAAAGTTAGTCAACAACAGTGTCATTACAGTCCCAG…
>EduN_1619
ACTCCTGTGTTGGAGTATTTCAGCATGGCAAAGTTGAAATCATTGCCAATGATCAAGGAAACAGAACAACCCCAAGCTATGTCGCCTTCACAGACACCGAAAGATTAATAGGGGATGCTGCCAAGAACCAAGTGGCAATGAACCCAGTCAACACAGTTTTTGATGCCAAGAGATTAATTGGTAGAAAGTTTGATGACGCTACAGTACAATCAGACATGAAGCATTGGCCTTTCACTGTTGTCAATGATGCCACCAAACCTAAAATTACAGTAGACTACAAAGGAGAATCAAAAACATTTTTCCCTGAGGAAATCTCATCAATGGTGCTTGTAAAAATGAAAGAAACTGCAGAAGCATATCTTGGAAAGTTAGTCAACAACAGTGTCATTACAGTCCCAG…
>EduN_1633
GCCTTTGTTTCTTCTCCTGTTGTTTTGTTTACAGCGCGCACCTGCAGCTCGGTTCTCCCAAAAATCATTTTAACGCCCACTTTACGGTTCTTTCCTCCGGTGGTGTCTGGCATTTGGACATTCAATTCACCATGATACATACAGCCAGGGTCAGTGGTATATCTTGGATTTTTATGTAATGATGTCCAAATTTCTACTCTCATCGCTGTTTGATTTGACCGGCAGGGTACGTAAACTTGTTCCCCAAACTCTTCATCTAATCCAGCGGGTTGTCCGATTTCTACGTGCCTATCAAAACGATCAGAACATAAGACGTCGCCTTCTTCTATCACTTTCTTATCTTCTGGGTCTACTCCTTCTTTAAAAGGCGAATTAGTCTTAACTCCGTACGTTGCTTTA…
>EduN_1670
GTCATTTTTAACACAAGTTGTGTAGCCCATCTGAACACGAACGTGATATGTAGAATCTGCGATCGGTATAATAGCTTTTACCGAGTTAAATACAGATACAGGCGGTTTCCAAACATAATTCTCTGGAATAAGAAATTTGGTAAGACCTCCGTGATCAACCTCATCAAATGAATCGTCGACAAGTTCATCATTCCACAGAAGAGTAAGAAATCCTACGATCTCTAAAGTTCCAGCGACTTCGTTGAAATCTATGACTTGTAAAAGATCGAATGACATATTTACCTGAACAACAGACAAATCTGCTCTCGGTGGAACCAGCGTGTTGTAGGAAGCTCTACTTCCGGTGAATGTCGTAGACAAAAAACTTTCGAACTGTGTTTTTAGAAACTAAAGTTCGCA…
>EduN_1676
GCACAGTTGTTATTACTTTGAATTTAGTACAAAAAAACAATGGAGTGCGGCAAAGGATGACTGTCGTAGAAAAGGAGGATTCCTTGTAAAAGTTGACGATGCCGTTGAAAATTGGTTCTTGAAATCTTTTGTGAAAAGTAACACAAACAGTCCGGCAGTTTGGATTGGAGCCAACGATATTAATCGAGAATACAATTTTGTTTGGGACCTCGACAATTCAGGCCTTACCTATACAGCGTGGTCACGTGAAGAACCTAACAATAAATACAACTCGGAGGATTGTGTACAGATGCGTAGATCAGTTGACTACGCATGGAATGATTCCACATGTTCAAATGCAGAATCATTTATTTGTGAGAAATTATGAAATGCGCTATCCTACTACAAAAGTTTGTTTAT…
>EduN_1678
AATATCAGGATAAACAAGACATACAGAAAGCCATTATGGAAATCACATACGAAGGAGGTGGTACAAATACAGGAGGAGCTATTAAATATTTACACACAACAGCATTCTCGAGGACTTCAGGGCATAGGCCTGGCTATCCAATGATTGGAATATTAATAACAGATGGGTATTCATCAAACAAGGCAGAAACTAGAAAGGAAGCAATGAACGCGCGGTTAAAGGGCATCAAAATGTTTTTCCATAGGAATTGGTAATGCCATTGACACGACGGAACTTGAAAGTGTTGCTAGCGAACCAAAAAGTCAGTTTGTTTTCTACTGCTGCCAGTTTCAAATTATTGAAATCTATTGAATCATTATTGCTGAGTAAGACATGCGAAGTTGCTGATATCACTTGTTG…
>EduN_1710
ATTACAGTGAAGAGTGTCTGTTACTGATACCAAAGATGCATTAATAAACGACTGCATGTATAGTAAAGCATCATGGTGGCATTCGTTCTTTATAGGCTCAATCATACAGGTTTTCCATGTCATAAATAAACCACATATTTCTTCCCTACTTTCACCCAAAGAAACACTCTGTACATTCGGGAAATCCTGGATTAGATTCAGTGTGCACTGTTGCAAATCAGATAGAATTGTTGGATACGTAAAACAGTGCCTGTTATGTGTGAATCCTTGCTTCCCTGCATTACAGATGTATCTTCCAGAATTGACGACACTCGACAAAACAAGTTTAAAACCATCGCTGCAGTCTTGAAGTTTGGAATAAGTACAAAAACATATCTGATCCATTACCCTGCATGCATG…
>EduN_1730
TTCCCGAACAAATTGTAACCAATAATCCAGAAATATTCTCTACTATTCGACAAATCAGATTTTTCCTTGATAAACAAACTGCTCATAAAGAAGTAACTGTTACTGAAGACGGGACAACTTTTACTAATAATCAGCAAGGAGTTGTACCAAAATCATCTGTATCACACCCAAACAGACACAAAAAGTTCAAAGGTGCACGAGGAACACATGTATTTACACACCCTGGGAGATATTTTTATGAAGTTATCCTGGAGATGAAAGTTGTTGCACCTCTGCAACAGAACAACATCGCATTTGAAATTGGTATTGCCAGAAAGTCATCAATAGACAACAAGAAGTATATTGAAGGTCAACCATATGCATGGTCAATGATAGGAGCTCACCATCCAGCATGTGATG…
>EduN_1765
GGTTTAGAAGGTGACAGAGGTGCAGGGGGTCCCGAATGGTAATCCTGGAAGGAATGGAGTAGGATGGAGAGCCAGGCATATTAGGTGAACCTGGCCTAAATGGTAGAGATGGATTACCAGGATCCAGAGGTATAAATGGAGAGAAAGGGGGATCAGGAGAAACTGGATTCCCTGGTGCTGCTGGTGCCGATGGACGACCTGGACAGTCAGGTCTTAAAGGTTTATCTGGAGAAAATGGATTCCCAGGTCAGAAAGGATTTGCTGGTCCTGATGGTCTCCCAGGTGTCTCAGGTCGTAAAGGTGAAA
>EduN_1778
CGCCATTTTGTTTTAAGAATCCTTTTTGTATCAGCATTTGTAGTGCTTTGCCTGTATATGTAAGTTGCATACTCTCTGCGGTGTCTAAGTATTGGACCTTAGAAATTGCCTTCATTACTTCATCTTGATCTCTGTAACTGTTGAGCCTAAATTCAAGTATGGAATCATTTCCAAAATTTATGAAACCAACTTGTATGTCAATAGGACTGACAGTAAATCTCTTCACTACGGCTTTCGCAAACTGTTTCAATTTATTAAACGATTTATATCCTAGGCTTCTTGAGCTGTCTGCTACAAAAATGACGTCTGCCATTGCTCCATCACAATTCTTTTTTCTTTTGCATTTATCTTCATCGTTTTGTTCTTTATCGCACGCTTTATCTACCAATTCCTTTCCGA…
>EduN_1785
ACTTACTTAATGACTACGTAGAACAGAAACGACTACATCAATGCCGTTATAGTTCCTTGGTTATTTTGTCGGAAAGTAAATTAATTTGTTAACGCAGTGTCCATTGGATGAAACTGTTATTTGACTTTTGGTACAATGATGTTAGACCACGGTTCCAGGATTATTGTTTTGTTTAGATCCAGCAAATAAGGGTGCTCCGTTGTGGTTGGAGGAGAACGAAAAACTTACAGTTTGATGATTTTAGTCATTATAAAAGAACAATGAAAATTTAGAAAAAGAAGCTTCAGATCACTCTGAATCATACGAAAAGCAAAGAAACTTTTTCAATAAATGTTTTCACTGCTGAAGATTGGACTATCAGTAAATCACCACCATCATCCCAGTATATACTCGATCTTC…
>EduN_1788
TTTGATGGTAATACTGGATTTATTTAATCTACAGGTGAAAACCAGAGATTTATGTCCACTTCGCTGTTAGCCACCAATCAGTCAGAACGTCACCAAAATGGCAGATCAACTTACAGAAGAACAAATTGCTGAGTTCAAAGAGGCTTTCAGTCTCTTCGACAAAGATGGCGACGGTACCATTACCACAAAAGAACTTGGAACTGTTATGAGATCTCTCGGACAAAATCCAACAGAGGCAGAGTTATCGGACATGATCAACGAAGTCGATGCAGATGGAAATGGCACAATAGATTTCCCAGAGTTCCTCACCATGATGGACAAAAAAAATGAAAGATTCTGACTCCGAGGAAGAACTTAGAGAAGCCTTCAAAGTGTTTGACAAAGATGGCAATGGTTTAT…
>EduN_1801
GCAGTGTTCATTAAAGCTTTGTTTGTCAAAAGAGATCTTAAGTTGGATGATGGTTCTGGCAGTTTGGATCCATTATTTAAGACAATTTTAAGAGCTGTATGACTAGTTGTAGGATCAAGGGCATCCATTTCTACAGTGTCTGCATTTTTATTGATTTCAAATTTAACCCATCTGTATCCTGTACAACGTTTAGAACCAGGACAACTTTGTATTAAGTTTTGTGTAACGGGATGTGATAAACCAAAGAAATCAGCTCCTTTTCCTGTTTGTTCTAAAAATTCTAAATTTTTTGTTTTCTTAACTGCTTTAATTAGTTGATTATGACAATCAGATATTGATCTGCTAATAAAATACAACACCAGGACTCTCTTCTGATGCTATCTACAAACACCGGTTCCT…
>EduN_1825
CATCAATTACAGCACCAATGTAAAAGTACTTGTGGACCATAGAATACAGGTTGACCAGGGGCACAGCCTGGCTTGGCCACTCGAGTCCTCTCCAAAAACTTTCCTCCAATGATTCCAGAGTTTCGTACTGGTGGTTCATAGATTGTCATCATGTCGTCTGCTAAACGATACGAAACGATGAACCTCCTTCCTCTGTCCTCGGGTCGGACTGAATCCATTGTGGCTTCAAATCTGAGTACTTTATGATCATTTTCCAACATTTTGATGAAATCTTTCTTGGGTGGTTGTGGTATAAGTGATAGACATGATTGTAAAGAATCTTCTAGTGAACCAAAATTATTGTATGGTGGAATTTCCATTTTTGG
>EduN_1826
GTGGAATTTCCATTTTTGGTAGATTTTTCACTTTTTCTTGCACATCTACTGTATTAAAGTCTGTAATTCCAAAGTTTTGATAATAAAATGCCTTTGTAAAATTATCACAATCATAGACCAAAAACCTTCTTCCGTACACAGTGACAGTTTCACCGATTTTGAAGTCTTTAGGTGTATAATATTGTTTGATTTCATGGTCTGATAACTCCATTACAACAGCTGGGAAAGATGATTCTACATTATATCTTATTTTTTGGAACTTTGTGTCTCCCTAATTAAAACTGGGAATGGATCTCGGCCATCATTGGCATTGTGTACTTCTCTGACTTCGTAGGGTGTCGTCTACTAAATAATAATGGATAACAAATGGTC
>EduN_1827
GTGGAATTTCCATTTTTGGAAGATTTTTCACTTTTTCTTGCACATCTACTGTGTTAAAGTCTGTAATTCCAAAGTTTTGATAATAAAAAGCCTTTGTAAAATTATCACAGTCATAGACCAAAAACCTTCTTCCGTACACAGTGACAGTTTCACCGATTTTGAAGTCTTTAGGTGTATAATATTGTTTGATTTCATGGTCTGATAACTCCATTACAACAGCTGGGAAAGATGATTCTACATTATATCTTATTTTTGGTAACTTTGTGTCTCCTATTAAAACTGGGAATGGATCTCGGCCATCATTGGCATTGTGTTACTTTTCGGTACTTCGTAGGGTATCATCCACTAAGTAATAATGGAATAACAAATGGTCTCTATTTCAACCAAACATCTGTATTT…
>EduN_1850
TTGGATGTTCTTCCCACTCCACAGACCGGGGAACGTGTCATCTGACGAAAGAACGACTCACGAATTGCATGACCATCCTCAGACCTCTGTCGTTCTCCTTGGGCTGTTAACATACCATCTTTGCATGTAACTTTTACCTCTTCTGGCCTATAATTGTCGACACTGAAAGTCATCAAATTGCTGTGGCTGTCACTGGACACCAAGGCCCGACCTTCTTGTGGGACAACTTGGAGTTGCTTCTCCTCTGACAGGCGGTAGGGGGCTTCTAACATCATAGTTCCATCAGATTTCATGAAGCTGTGAATTTTTTCGGCATCAACATTTTCTGGAATCTGGACTGTCCTTGTGCGCTCGACAGTATCTCCCCATTCATCATTACCGTCTGTGTACTTAGCATGA…
>EduN_1890
ACAAGGGCAAGGCGAATTTTTGGAAGAGACATATAATTCTACAAAGAGAATGATGCTGAAATCAGTACAGACAGCCAGCTTTATCAAAAACAGTTGTATTCATTTCCAACGACACCACTTGTCAACAGTTAGACAGCAGAATGTTTGTGGTATTTTGAATTATCCAAACTCAAGAAGATATGCAACTGATAAAGTTAAAGGCCATGTCATTGGAATTGATCTTGGTACAACAAATTCGTGTGTTGCCATCATGGAAGGAAAGCAAGCAAAAGTTTTGGAAAATGCTGAAGGTGCAAGAACCACTCCATCAGTTGTAGCTTTCTCAAAAGATGGGGAACGAATAACAGGAATGCCTGCTAAACGACAAGCAGTTACTAATGCAGAAAACACATTATCAGC…
>EduN_1915
AAACTATTAGTCACTGCAGGAGCTGATGTTAATTCTACAGATAAAGATGGTCTTACAGCTCTTCATTGTGCTGCCTCTCGAGGACATTCAGATTGTGTTGATAAATTAAAGAAACTTGGTGCTGAAGTTAATGTGGCTGATACTAATGGATGTACAGCTTTGTTTATGCCATAACTCTTAGGAAATAAAGAATGTACAAGTACTTTTATGAAATATGGTGCAGATCCCAATCAACAAAGACACTCGAGGGAGGACGCCTACACATTGTGCTGCAATAAAGGGTTGCCTAGAGACAGTTAAAATGTTAGAATAAAAGTAAAGCTGACCTCTGGCATCCTAGTTTCCGTGGTGATTGTCCTATCCATGAAGCTGCACGAGGGAGGGACATTGTGATGTGGT…
>EduN_1925
CATCATTTAAAGTGAAAGTTCCGGACAATCCCCAGGAAAATATGTCGCATACTATGTCACTGTCCTTGGCAAGTTCTGCAGCTCCCTTGGAGAACAGCTTAATTTCCTTCCCTTTTAACAGGCTGATATCTGAGAAGGTGTATGTATGTTTGGTGGTACCATTCACTGTCTTTTTCAAAGACCATCCTTTCAAACTAACAGAAACAATATCCTTTTTAGAGGAATTCTTCAAGGTTACACAGCTTCCATCTGGCTGGGCATTCTCAATAGATATATCTCCTCTACAGGTTCTTTGTACCAGTAATTTTGTTGGATGATTCACTTAATGTGTCTTTTCTGTGAATCTCC
>EduN_1953
CAGAAATCAACAATAATTTCGACCACTACATACAAACCCTGGAGAAACGTCGAGATGAGTTGAAGAGAGACGTTGACAAATATGTACAAGTCAAAGCTGGAACATTGGAGAACCAACTTCGAAGTTTGAAACAACAACAAAAGCGCACCAACGAGGCGGCTGAATTTGCAGATCAGACACTGTTGTATAACAATCCTCCAGCATTCCTACAAATTCAAGGTACAGTTGTTGACAGACTCGACAAGCTTCACAATGAGTGGTTTGACAGGGAACCCCACGAGGTAGCAACCATTGGATTCAGCTGTAAAGGACTATCACAAGAATTTCAGAACAAAGTGTCATCCATGGCCAAGGTATGGTCATCAAATGCCTACCAACCAAACACTAAAATCACCCCAA…
>EduN_1962
GTAATAAGAGGCCGCACAGCATAGGAACTCATATGAAATGTTGTGGGGTTGAATATTACAACAAAACAACACATTATTGTAAAAAGAAACGCATTGTCTTACCCTTTTCAAAACCCGAATGTAAGAACACCGAGTATGACAAAAGGAAACAGAAATGTTGCACTGGTACCTTATATAATGTCAGCGATAGTGATGAGCAGTATAAATGTTGTGGCACAAAGTTGTATAATGCAGATGATGAAAAATGTTGTGATGGAAGTTTTACCATACCACATGATGCTGAGTGTTGTAGAAAAAGGCCATTACTATCCAAGTAGCCAGATGTGTTGTAATGGACTCCCTGTTGACATTAAATCATTAACAGAGATGTGTTGTGGGAATGTATTGTATGACAGCCAG…
>EduN_1978
AATCCTACAGTTTTTTCATTATTTTTCATAAGATACGAATGGAAGTATTTTCCATCTGGAGACATTGTTGTTGCAGATATTTGATAGAATCCTTTCCTTGGTGCTGTGAATATTCCAGAATTTGGGTCATATCCATTCCCCTCATTAGTCCACACTTTATCAAACTGAACAACTGCACCAGAGCCAATAGTATTTTGTAGCTGAAAGCGAAGCTGTGAATGCTATCACAATCTTCTTGCAGCTACAGGTAGAAGGTTCAGAACTGGTACCCTTTATCTTCATCATCATATTAAGAAGATCTT
>EduN_1982
ATTTCTTTTAAAATTGTACAACAAAACATAACAATAATCTCACAAAAAAGTCATAGATTTATAAATTAACCTAATGTCTTCTATTATGTGCTGGTAATTTAGTTGAATAACAACTGCACATTTGTAGTGACTTTTCTACCATTTAATGGTTGTGGATTTCTATAGTTGTTGATAAGATCTTCTGATCCTGGATAATGTGTTCTTCCAAGACTACGAAACTGGTCCAACTGATATTGTGAAATATAGATGCGATGTAACAAATACACTCCAAATGACGCTCTGATAACATGGTGGTGTTGTCAGACTACCAGCATATCTTAGATAGTCTGAAGTTTGTGGGAATAAATCTGACAAACTCAATGCTTTTATTATGACACTATTAGCTTTACGTTTAATGTT…
>EduN_1997
CTCGTTGATAAAATAATGGGAGTGGTAGACGATTTTAAGGGAACATCTATTTTTTGTAAAGTAGTCTTTATTTTATTGTTAATTGCTACTTTATTTACATGCATTTCCTATACGACAACTGATTGGGTTTATAATGATAAAGTGGTGATCGACAATCATTATGGTTTATGGAGAATATGTGGAGAAACAGAAGTGCCAACAGCATGTCAACATATAGATGGCTGGGCAAATGATTGGTATGGTGTAGTTCAGGCATTTGTGACCTTTGGATATTTTTTGGCAATTTTTAATTTCCTTTTTCCTAGTTGTACTGTACATATTTGTTGGCAAATGTCAGAAGAATGGAGAAGTTGC
>EduN_1999
CGGAATCAAAACTATACGAAATCAAACGAATAGGAAGAGAAACAAAAAATGGCTTTAGTGAAACCAAAACAGTACGACTGGAAGGATTCTAACCTGGCCTTGTTTGGTTCAGATACAGAAAAACAAGTCAAAAAGGAATCGGCAGAACATGAACCAGCCTGGAAAAAAGACAGGTTTGAAGCCAGGTATCCAAATTTGGAGAATTGTGAAATTCAAAGTTACACATTGGCAAGAGGAAGATTTTGGGAAATTTTATGACGGAGATTCTTATATCATACTGAATACATACAAAGAAGAAGGGAACGAACAATTGTTGTTTGATGTACATTTTTGGATCGGAAAATACAGCACACAGGACGAATACGGAACAGCAGCATACAAAACAGTTGAATTAGACAC…
>EduN_2002
CAGTCATTTCTCATAATTTAATTCTAAATTCCATTTTAAATCGGAGAAAACCTTAAAAAAACGTTGATGACGTCACGGTCACATGACTAAATTATGTCTATGGGCTCATAACAAAATAACGTCAGCCAATCAGAAGACGCGTTACATCCAAAATTAAATTATTGAAGAATGAAACAAAAATGTGAGATTAATTATTGCGATTTCAAGAAAATTTTCATTCAGATAACATATTAGATATCTGAATGTGAGTTCTAATTATTGAACGCATCTATCCAATCGAACTAGAGATAAAGGATACTACAGATACAGTTAAGTCGGCCTCATATCTTGACTTACATCTAGAAATTGACAATGAGGGTCGGTTGAAAACAAAACTTTACGACAAAAGAGATGATTTCA…
>EduN_2010
GTTTGCTGATTGCTACCAGCTGCTGTAAACAGCCAGGCAATGTTTTGAGCAGAAGGAGTTCCACTCACAGTGCATGTAATTCTCTGCTGAGCACCTTGGACAACATTTTGATTTTGTGGAGTGACAAAAACAGACAGAAGTCCTCCAGTAATTGTGACTGTTCCTAGATTACTGCTACCAGTGCCTACAGCATTTGTAGCAAAACATGTGTATACTCCAGCATTGGCAGTTGTGGCAAAATTAATGGTTAATGAAGGGGTAGATGTTGTACTGCCTTGATATCCCTGGTCTCCATTGTCAATTCGTAGAATTTGATTATTTGAACTTCTCTGCCAGTAAACTTGAGTTGCAGCAGGACTAGCAGATACAATATTACAATTAATTACCACTTGACTTCCA…
>EduN_2014
CTTGCAGGGAGCCAATGAACCTTTCATCACCATTCCACTACCACCCATATATAGACTATTACATTTTAACCCATCCTCATCAAAATATGGTGGTTCTTCCTGGAGTACTGAGACAGGAACTTTGGAATCGTTATCAACACCAACAAAAGCTGTGTATTTGGAGATAATGTTGGCTGCTTGGCTTACCAATACAATCTTGTCTTTATTGCTTCCATCCCTTCTATAACTTGAATCATCATCATTTTCCAAGTCTTTGATCTGGTATTTAGCTGCAACACGATGTAAAGGTAAATCATTGTGGGAAGAACTTGGAATTTCTATTTTCACCTTATGACTAATATTCTTTCCTCCAAATCTTCCTTTCAATTTGAAGGAACCAGAAATACCACTCTTGGCATC…
>EduN_2024
ATTATTTTGTCATATATCAGATACTGTAAAAAATTGCTACATCTAAAATTTAGGACACAAAACAGTAGTTCAGCAATAACTAATGTTTGTTTGAATGTAATGTTCTAGTTTCTGAATTTTAAAACTCCAAACTTTTAAATTTGTGTAAGGAAATCTCTAGCATTAATCCAAACATATTATTTTCGGGCACTATATTGCAAAATGTACTACAGATGGGAGATAACTCCGTAACCAAACTACAACATCTTTACACTTGAGCTTCAATAGACAAATAAATATATAATAGCTGTTGGACTAATACATATATCCTTTAAATATGAAATAAAAATAAACCATGTTGTAATAAAATAATCTCTAGCCCAAAAAGAATCTGAAAGGCGAAAAAAAAGCTTTGTTCAC…
>EduN_2061
CTAAAACCATGAAATTAAATATCAACGAATATGGGAGTTTTCCTCAAACCACGAAAAATTGGTACCCACGAAAAATAAAATGAATTCACAGTACATGATATACATCTAACCAATATCTTTTGTCCTCATTGCTATGATTTAACTGATACATTGTGAATTTAAATTTCAAACCCTACTTCAACAATCTACAAATTCTACCTTTAAAAGCAGGCCTTTGTGTAGGTTTCTGATGCCAGCATCTTGTCATCATTTTAGTGAGGAACATGGGACAATCTTTTGGAATTTGGATAAAATCTGGTCTCTGACCACTCAATACAGCAGATCTAATAAGTTCTTCTGCAGCAGCTTTATATGGGAATTCTCCTGATAGTAACTCCCAGATAATGATAACCAAAACTA…
>EduN_2068
ATTGATTACGTGGCAAAGTACTGGAATTCATCAGGAGTACCGAAAGAAAAAATAATTATTGGTTTAGCTACGTATGGGCGAACATTTACATTATCTGGTAGTCAGACAGGTATCGGAGCTGCGGCGAGCGGGCCTGGTATAAAAGGGCAATATACCAGAGAAGCTGGTGTCATGTCGTATTATGAGATATGTGCTCTTCAAGAAAGTGGTAAAGGCCAGACAGTGTACGACAGTGAACAGATGGTTCCATATTATACTGACGGTTCATTGTGGGTTGGTTTCGACGACGAAGTTAGTCTTGCAATTAAAATTGAATGGTTGGTGTCAGAGGGATATGGTGGTGCCATGGTGTGGGCTCTACCTCTTGATGATTTCAGGCAAACATGTTCTAAAAGTAAT…
>EduN_2073
AATATTACGATTACGTATTACACCGCTGCATTATCTTTTTCTGTTGATATGCATCTTTATTTCCCGCGCAATACCGATATCGTTGAAGTAAAGTACAAACAAGCCATTGAAATCCTCAAAACGAACGACAAGTCCGGTTCATTGTCGGAATTACCAGCAACAGAAGAATATTTCGAGAAAATACTAATCCAGGAACCTGGGAGTGCATATGTCAAGAAGGGTATCAACTTGATATTGCCAGTGGCGATTGTTCTAATATAAATGAATGTGATGCTAATGTATGTACACAGAACTGTAATGATACTGTTGGTAGCTACATCTGTTCCTGTTATACAGGATTCAAATTAAATGCTGATAAAACTTCATGTTCAGCCTGTGTGAATCCATTTTATGGTGACA…
>EduN_2079
TGTGTTGTAACAAAAAGAATAACTTCGGAAATACTGATCAAGAGAAAGTAGAAGCCACCATTAATCAAAAAGACCCACATAAAAAATAAACTCACAAAAGGACAACAAACCTAGCAATGAATAGTTTGTAATGTTTCGAAAACCTGTCATAACTAAAATTATCTATATTGCAATAATGATAACAACAATCAACACATGTCTTGTTGTTGATTAAAATCCTTGTTGGTTAAGATGGCCGACCATTCGCTGCAATTAAAAGCATTACTTAAACGTCTAATTACAGGTCGGGCTTGCGTTGAGGTTTCTACAGAAGGATCTACGACGTCTGATAACAAATGTGTAGGTCAGTTCTGGGTAGGTACCTACTCGACAGGGATAGCTCATCTCACGTCGTACTGC…
>EduN_2095
GTTTGGTCGGATTCGGTATCTCTACCTCAACTTCGCCGAGTTTCAAGCAGCCACCTTCATCGATAAATTCCACGTTATCTTTTTCTGTATAATATATTGGCAGGAAATGTGATTGCTGAAATTCCTCCGACGTACCGTATGTGTGTTTTAATTCTTTTCCTATATGTACCGATGTATTTGCTTTCATGAAAGGTTGGAATACATTGTCACATAAAACATTGCCATCGACGTAGACTTTCCGTCTTAAGCTATCTTTAGATTCGTCAAAAAGTCTCACGACTTCAACACCACAAGTATACCTTGTTATCCGCGATGATATTGAATTCCGGTTTGTATCCGAACAAAACGGCACCTTTAAGAACTGCAATACCAGCTTCGTCCGGTACGGTGACATGTTTG…
>EduN_2121
CTTGTATATCTTTTTCTAACGCGGATGGTACCAGACGGGTTGGGTATCTCATTACGGCTTTCCCTTCTTTATTGATAAGGAATTTTTCAAAGTTCCATCTTACATCACTGTTATGGTAAGGCTTGTAATAAATTCCTGATTTTTCTGTATAAAATATGTCATCTACTGGTGGACAGTAAGCCTTTAGATAGGTGTATAAAGCATGTTCCTTTTCTCCATTGACATCAGTCTTTTGTGTCAGTGTGAAGTTTGGAACGAATCCGGAACCTGGACGAACATGTTTTAGCATGTTTAAAATTTCCGTTCCATTAGCTCCTGGTTCTTGCTTTCCAAACAGATTACATGGAACCCCGACGACATGGTAAGTTTTTATAAGTATCTTGAAGTGCATTCAACCCA…
>EduN_2135
CTCTGGTGCTGATTCATTTGATTATTATATAGATTCCTAACCAATAGTGTGGACGAGAAACCCTATGCTGAAAGAATAAGAAGGAGAGGCAAGAAAGAAATGGTTACAACAGGTTGTCAGTGCTGCAGAGACAAGTGGGGCCAGTATGGAACCAGTTTACAAGAGTGTCTTCCAGGCTTTATATAAGGACTCTGAAGCCCATGGAAATGGTAAGAAGATAAGTTCTAATATTGCTATGTTGGAGCGTAATCGTTTTGATCAAGAACGAGGTGAAGTTTGTCTCCGATATGTGGCTGCCACCATTGATGATGCTGACTTCCTGCTCGGTAAAATACTCTACAAAGACATGAAAGGAATAAGTTTTGCATCTGTTGAACGAGGTCAACCAATACATGTACC…
>EduN_2141
GAAAGCTGAAATCATCTCTCTTGTCGTAAAGTTTTGTTTTCAACCGACCCTCATTGTCAATTCCTAGATGTATCTGTATCTGTTGTATCCTTTATCTCTAGTTCGATGGGATAGATGCGTTCCACATAGTCACCAAATTTTGAATTATTTAGTGAAAGAACATCATCTATATAGCGGAAAGTAGAGTTAAAGGATATTGCTAACTTCTTATCTTTCTTCCTAAGAAGTTCCTGCATGAAGTCAGCCTCATAATAATAAAGAAACAAGTCGGCAAGTAGAGGGGCACAGTTTGTTCCCATTGGAATGCCGACAGTCTGTTGAAAAACACGTCCTCCGAACGTAACAAATATGTTGTCAATCAAGAAATCAAGCATCTTGATAATATCAGTTTCAGAGTAA…
>EduN_2149
TGGTATTGGTACTAGATGTTATTGTAGTGACAGTACTTCCGACTGTTCTCTGCCAGGTAACACTTGTTACAGTTGAAGTGGATGATACAGAACACGATAATGTAACTGATCCTCCATTGTTTACAGAGTAGGATGACTGTTGAATTGTCACAGTTGGTGTGCCTGGCGTGGTTACAGTCAAGGCTGCAATATTAGAACTTTGTCCAGTTCCAAAGGCATTACTTGCAAAACATTGGTATGTGCCCTGGTCATTGCTGTCTGTATTCAATATGGTAAGTCCTGGTACAGATGTAGTAGAACCACTGTACTTGTTTGTATTTGTACTAGGAAAAAATATTGGTAACAAATCCATTCACAGTTCGCTGCCAAAATACTTGGTTAAGTGCAGATGATGATGAC…
>EduN_2161
TCTCTAATATTGGCACATGGGTAGTATGGAAGACCCTCTTAGAGGAACAACTTGTTAAAATTTTAATTTGTAACTATCCTAAGTCATCTATGCATTAGTTGATGGACCTCCACCTTTCTTCGAAAAAACTAGGGTTAGCTTTTTGTATTTGTTTCTGGCCTCTTTATATGATACTGACCATTACCAGGTAAACTTTGGAAAATAAAATCCCATGAAAATGAAGCAGGTTTTCCTCCTTTATTGTTATCATACACATAGGGATCTTTTCCACGAAACATCTCATTATCATATGCTCCTCCTCTTTCTGAATCGACTGACTCATCATCCCAACGACCATGGAATGCACTATCACCAGGGCGATTCCAGCTATTGAATCGACCAGGTAAAGCACCAGTGAAA…
>EduN_2170
TCCCTCGTGTGCCTTGAGGACGCCGACCACGCCACGTATCGGAAATTACGTTTTTTTAATTATGTCCCTCGATGACATAAGAGTTTGAAAAGACCTCCAACTACAATGAATGTTTTAATTTTTCTACAGTTTTAGCTTTTTTCTAAAGCATATTTGATATCTTTCACTATATCGGAAGCAACCTTTGAGATAAATGTAACAATTAAATCCCGATCAATTTTCATTCTATCATTTACGAGAACTAGCGTCTTATCATACTTCGAATCTTTTAACATTTCTTGAAATTCCTTTCCGCACTGTTCTCTGCAAAGTTCATTTAAAAGATTTAACGGAAACTTGCATGCAAATTTTGTCTTTTGTGAAGTCGTTGAAAATAAGTTGTTTATGTTTTCAAATTCA…
>EduN_2177
AAAATATAACAATTATAACAAGTATAACTATAGAAAAATGTCCATCTCTTTAATTAAATGACCATGGTTTATCATATGCAAAATGAAATTAATTTCTTATCTGGTAGTTTAAGTATGAGTTTTCCCCCCCAAATCTTATCAATTTTTTATTCAATAGTTTTGAACCCTTTACATACATACAAGTATTTATTTTTCTGCTCTTTTTTAAAACCTTGATTGAAACTGATAACGTTCACTTTCATTAGATAAACAACAAAACAATAGAAAGTAATAAATATAAAAAAAAACATAATTCATATATTCTTAAATTATCAAACATATAAGAACATTTTACAACCACATGAATACATCACACATATTAGACATGCGCAAACAATTTGTGATGAATATGAATATTTC…
>EduN_2180
ACCAGGTGGTCCTGGAGCCCCCTGTAATCCTTGTGGTCCTTCTGGTCCCTCAAGTCCTCTTGGTCCTGGAGATCCATGGTCTCCTTTATCACCAGTGTCGCCCTTTTCGCCTTGGTCACCTTTCATACCAGTTAAACCAGATAGGCCATCTAGGCCAGGAGCTCCAGTATTACCAGCGGGTCCCTGTGGTCCTTGTGGTCCAGTCATACTTTTTCCTGGTTGACCTCGTTTTCCCGGTTTTCCTGGAATACCATTTGATCCTGCCAAACCATGTGGTCCCCGTTCGCCTGTAACTCCTTTAGGCCCGGCTGGTCCGGTTCTGCCATCCATTCCATCTGCACCCGGTAATCCATTCTTTCCAGCTAAGCCATCTTTTCCAGGTTCGCCTTGTGCTCCTCT…
>EduN_2193
GCAACATTGTAGAGAAAGGCTGAATGCTCTTTATTTGTAACAAGCAGTTTCTTTTTCTGTTTATCAAAGAAAATAGCGGTTGGTTTAAGGAGACCATCCCCTTTGGTCAGGATTTCCTTGTGATGTGATCCGTCGCTTGATATAATGAATACGTTCGACGATTTTTCTCCAACAACGTACACGTTACCATCATTATCTAAAGTGATGCCTCTCGGTCCTTTCAAAACTGCATAATCTTTAAAAGTCCAAACACGTGCCCCATCGTGGTCACAACAAGCTACACTGTTATTATCCCCGTTAGTAAAGTATATCTTGTTGTTGAATACAGATACGTAGGATCCCCAAGGTAATTTACAACTGATCAAGTGAGAGGTAGTATAATCCACAGTTGTTTACTTT…
>EduN_2226
GGAGCCATGCAAAAAGCCATTCTGATGAATGTAGGTATCCATTCCGAACAATAGGGAATAGCTGTTACTTTATCAGCAAGGAGAAAGCGACCCCAGATCAAGCATTTGCATTGTGTTTACGACATGGTGCATACCTTGCAAATTTTGAGACTTTGGAAGAAGCAATGTTGATGAAGTATGAACTTCAACAAATGAAAACAGGTTTACACTTCCATTTTGGAGGGCGGAACATCAACAGATATATTCCTGGCGGAGACTGGAGATGGATACACAACGGCAAAATGATCAAGATGAAATACAAAGTCTTTTGGTAGCGGACAACCTAACGAATCGAATGCTAGCCCACAAGACTGCATGATGTTTATGCCGGAGAAAGATATATCTGGCATAATATATACT…
>EduN_2229
TCTAGCAGTACGAATACAAAACGTATTGTTTATGTGGGTGGTTTAGCTGAGGAGGTAGATGAAAAACTTTTACAGTCAGCATTTATCCCTTTTGGTGACATTACAGATATAAATATACCTTTAGATTATGAAACAGAAAAGCATAGAGGTTTTGCATTTATTGAATTTGAATTAGCAGAGGATGCTGCTGCAGCTATTGATAATTTAAATGATTCAGAATTATTTGGGAGAGCCATAAGATGTAATTTAGCTAAGCCAATGAAAATCAAGGAGGGAGCAACAAGAGCAGTATGGTCAGAAGATTCATGGCTGCAGGAGCATGCTAGGAAAAACATTAAGAAAAAACAACAGAGGAAGTTAGAAGAAGACAAAGGAACAAAACGACCTGCTGAGGAGAC
>EduN_2237
TTTCCTTGCATGAGTATAAAAGATATGTAAAATTGATTATATATCAAAATATCAACATATTTAACAAATATAATGTTGTATTCAACCTTTCCCAAATAACTAAGTGTAGTTTTATATAAGCATTTACACATTACCTATGCTTCTAAATAGTGTAAAAGTTATTAAATGTGTGTTTACAAACTAGCAGATCCAAGTAGGTAGGTTATCTAATCTGTGGTAGGACATCCAGGAAGGAAAGAGCAACAATAAAAAGTAAAATCAATTTTAAATTTATTTATTTTTTCACTTAATTTAAGGAGTACCAGGATGTCCTACCACAGAGTTGGTAACCTGTCAAAAAGCTATATAATCTGGGGGTCTTGCAATATTAAAATAGTCTTTTAATTCAAGAAAAAAAGG…
>EduN_2244
AAAACAATAAGTAAAGTGTTTTGATTATCAATTTTTAATTTCTAAATAGTTTCAAAAGTTCATTAGATGAATTTTCTAAGGAAAAATGTATGTATATGCCAAAATAATGCCTGAAATATATTTTAGCAAAAAACTTAAGATTTGCATTTCAAATTAAAGAAATAAATTCTGTAGTTAGGTGTGTAACAGTACTCCTGAAAAACTATTTCCATGGTCTGCTATAACGATAACGTCTCCAGAAGAACTAGCACTGGTACAGTATATCCAGGCCTGTTCACCTCTGGACAAAAAATCTACTCCCATTTGCAGATACACCATTAGCCTACCAATTTGGTTTTTAAAATTCAGATCCCCGATCACATGTCCAGATTTTCTTACTTTGTATGTGCATATGAATAG…
>EduN_2282
ATTGGCTTCCCATGTAAATCCTAACTTCCGTTTTAAATGATACCAAATTTCTCCTATTACTAGGAACACTTCCACTGCTTGTGGAACGTCCAATCTAAACATGTAGCGTTTGTTCGTCATCAAGTCACCTGACACTGGCTCGTGGAGTGTGCACCTCTGCCATCGATGGTAGGTTTTAGGAAACACAGTAACGGTAGGGTTAGCCTCCTGATTTATTATTAGATAACGATATGCACAATCTAAAGTCTGACCTTCCTTGTCAGAACTAGATGCATAGAGCGAAAATATGTAGTAACCATCCCTTGGACAACGAATCATATAAGTTGCATGTGTGTCCGTCCTTGACCTAAGAAACACGTAGCGATCAATGTCGGTTACTGATTCGTCACTTGTATCGTA…
>EduN_2298
TAAGAAACAAAAAGTACAAGCCATCCTTTTCCAAGACGGCTATTAGTAAGTACTTGTGAAATCATTTCCACCCTCCCCAAAAATCATTTCTGTTGTCACACATATTTTCCAAGGAAATTTCCTTGTACACTTGTTGATTTGAACATGAACACAATTTTTAATGCTGCAACACTTGACATTTGTATATTTTATTCCTTGCATTCATTTTCCTTTTATCCAAATCAGTCAAATTTAAATACAAGAACATGACCTACAACCTTATACAAAAAATTGAAAAAATGACTAGAATTGAAGTGCACAGGGTAGCACAATGCTGGTATTAATGAATGGAAGCTATGAAAAATGAAGAATGGTAACAAATCCTTCCATCGGTTACTTCGAGGTCATCATCGTTACGAA…
>EduN_2320
TGATTTGAAGCATGGATGCTCATTTTTCTTTATTTATAACACATAATGTTCAAAAAGTGCACGACTTAACATTTCTAATGAAGTATCATATGCCATAAGGTACAAGAAATTCTGTACTCTGCTGCACCACTATTCGAAAAGTAAAAGATTTGATATGAGTGATCCCATTTCAAAATAATTTTACAAGAATTTATGCATATATACACATGCATATTATGAGAACATTGTTCGATAAAGATAAACATACAAATTGAAAACCGAAGTAACATTAAAATTGTTACAGGTATATGCTCATGTTCTATTAAATGTCACCACGTGTTCTATTCTGTCTTTGTCATATTGTTTACTCCAATGGTTTTTCGCATATGAATCTATTCTGATTCCAACAGTTGTCATCAT…
>EduN_2331
AGGTCAGTTCTGGGTAGGTTCCATCTCTGCAAGGGTATGTCATTTCACGTCGCACAGCACATCTGCTCACAATTTCGTACTCGTCATGTTCATAGAAGATGGACATATCAATTGATGGTCTTGATGCGAATCCTGGGAAGTATTTGTCTAACATGACCTTGTCGTAAGACCATGACAAAAACTTAAAAGTTGCACTCGTATACTTCACCAGACTTTTCTTGACAATCAGTTGAAATGAGTGGTCCTTGTGGACAATACGTTACGTCACCATTTTTCATTACAATCACTTTGGTATGGAAGTCCGATTCATATTTGTGTCCGAGAAGAACTATGTCTGGTATCCAGATTTCTGATGATGGTAGACTAATTCTAGGTTGTCCTTTTGGCCAGGTCAGTCTT…
>EduN_2351
GGACAACATGCATACATCTGTACGGCTTTATATGCTGTGGAATTTACATATTCCCATTCAGGATGTTCAATATAATCTTCAGTGTCAACAAAGTCTGAGGATAGCACAATGTCTAGTGCCCTACCATGATATGACCAAGAACCAAATCGCATCAGGCAAAATATAACTGTGTTATCTATTTCGCTCCCTTCACAATTAGTAGTTATGGTAGTAGGAGGATACCAGGACAGGGAACCACTATTGAAGATGTAAACTCGCGGATTGTAA
>EduN_2355
CATCGTTGCTTTGCGTGCCATACCCAACAACCAGGATAGCGTGATTTATGGTGTAAGAGATGCAGGTCGGATTATTGAATACACCTCGTTTATACAACATAAAGTTTTTATCCACGTAAATGCATGCAGATACAGGTCCTACTGTTGCAACAGCTTGCTTCAACTGATTTTCATCTCCATTACGGATCCCAGTGTAACCGGTGATAGAAGCTCCAATATTAGATT
>EduN_2361
GACGAGGACAGAAGTCAAACGACAGGTGGTTCAAAGGCATCCAGCAGAAGAGAAGGAGGAAAGACGAATGAATTTTAGGTAGGCAGCAGGTACAAAATAAGGCAGCAAGACTTGGGACAAAAGGTACAAGACAAGAAGACAGCATGAAAGAATTGATGCAAGACCATCATCGTGATCGTGTAATTGCTCAACTAGAACGTGACCACCAGCGTCAGGTCAAAGAACAACAAACTGTAGAAAAAGCAAGGGAAGCTAAGAAACATATCAGTGCTGAGATACGGTCAAAGATTGAGGCTAATCAGCTCAAAGAGAGAGAAAGAGACCAACAACGAATAGATGCTTTGAGGCTGAGAAGAGAAAGAAGGG
>EduN_2371
ATCCGGGTCCCAGTCCGGCCAGCTTTGGATCCCATAGGTATATCTAGCTATACGTCGACTTACTATTCTTGGTCGATGTCCAAATAAGACCGCCCCTTTAAGAACGGCAAGACCGGCTTCTTCTGGAATAATTAGCTTTCTCGGAGCGCCTATTTCTTTGCGGACCGAGTCTTGTACCAATTCACACTCAGAAAATCCTCCAACCATCAGAATTGTGTTTAAACCTGACAATTTGTCATTGCTCAGTAATTTTCTTATATGCTTAATAAGTTCTTCAATGGTTTTCGTGAATAAACTTCGAAAAGTGTCCGGAGAAATGTGAAGTTTCTGCTTTGCGTAAGCGACACAGTCTTTATACCGAGACTTTCCGAGCGCGTTTTCAAAGTTTCTGGTGTTTGT…
>EduN_2401
GAAAATGTCATCATAAATCATGGTCAGCTACACTCTGCTTCAGATATTCTTGATAAAGTTTTTGCTTTTTAGATTTAACAGTATTCTGTACATAATCTCTGACTTCCAATAAAGTATTTTTTCTGTTTTCTAGATAATGTAGGTTTTGTAGATGAAGCAAATTTAGCTATAAGTAACATGATCAGGGCAACACCAACTATTCCAATTATAACATATTGTGAGTATTGTGCTGGTACCTTCTGCCATGCTCGAGCTAATGGGCCCAAGTATAGAGACATAGTTGCCAGAATGTCTTCACCAAGTAACTTTTACAACTTCAGTATTTTGTGCTGACTAAGTAAGTTGCTAGTAATATCAATGGTAACAGCATGCCTAATAAAAACCAAACAATGCTCCACG…
>EduN_2419
CAGATCATACAAATAATTGTTTATGTCACTTGTTTATCGTTTATTATTACTATGGCTCAGTCCTCTTGATGGTACTTTAAAGTTTGATGCCGCCTGATACTGTAAATTGTAGGCAAGTGGGTGAATCTTGAATCCATATAATTTTGGCACAAACTGATTGGCTGGACGTTTTGGTCTGTATTCTGGATGAACCATAAATAGCATGTGGGGAAATCCTGTGCCAAAATAGGCTCCATCAGTGTGATGATGTCGTGAAGACTTGGGTGTGTAAACATCTTGACATTTTGGACAATACAATTTCACCATTGCTTCACCTGGTACATCTGACAAACCTATAGGTAACATTGGTTGATTTTCACAATATACTCTTGGACAATAACCAAAGTCTCCTTGTTGCCA…
>EduN_2436
CACCACACTGGTATGGTGAATTACAAAGAATTTTTACACAGATTAGGTATAGCTGTAGCCAATCAAATTAGACCATTACCTGACAATGCTAAAGGAGCCTTAGTATGGCAAACAGCAGGGACCACAACAGTCAGGAAAACACTTTAAACAGAGGAGAGATGATGAAATGGCTTTACAGAAAATGAACTTTAATCAGATAGAACTGGAATTCAGAAATAGGATGAGAGTAAACCACTTGAATCTGAAGAAGATATTTTTATCATTTGACCGACATTTAGATGGATTTATTAACTTGGATGTATTTGAAGTCCATTCTGATCCAGTTCACAACTCCCTATGTCTGATCAGTTGTTTACACAGCTCAGTAGGAAAGATGTGGTGTGAGAGGAAGCACCAAGA…
>EduN_2441
ATGAGCTTTAATCATCTATATTTTTTTAACAAACATATCCAGTTGGAACCGTACAAGGTCTATCATTCCAACCACAATAGCTCTTGTGGCATTTCTTTTCACAATAGTTTGCACAATTTTCTCCCCTACCACCATTTGGTTTACCAGATTGCCAATGGGTATAAGTAATAGAAGCCCCAGTCTCCCAGCGCCATCGTCCTTCACTATGACTGTCGGTACAGCCAATCCATACTTCGCCTTTCAGCATCGACACCAACCATGAATCTTCTAGATCATTATCTACTTCAACAAGGTATCCGCCTCTATTTGCACATTCAATCCTTACGGTATTCCAAGTTGTAAAATCATAGCTGAAATAATAACTAATTTTTTTCCATGCAGTATCCAGTGGACGGGACA…
>EduN_2446
CTTACATTGCATAGTTCTGTTTTCATACAGGTAACATTAAATGCAGATAATCATCATAGCACTAGCGGATTTCAATGTTGCCACTTAACTAAATTCACTCAAATTTTGTCTTTTGTCTATGGAATGATGAACCCATTTCACCGAATAAATTCAATAAAACATTTAAAATAGTTATGTGGAATTCGACGTACTGTCGTCTTTTTCATAAGATTTGCAAAGATCTTCGCAGTCTTCTTTTGTCGCAAAATTGTTTCCGTTACCACGACAACCTCCATATATAAAAAATTCACAGTTTTTAGATTGTTTGTTGAAGAAGTATCTGGGGATTGATGCACGACACGGTCCAAGGCTTCTCGGTTCAATACAGCTGGGTTCGGGTTTCTCTATTTACTCCATCTA…
>EduN_2464
GTCGTTTATGTTGATGACTGATACGCTGTGGGTCCTGTTGAATCATGTGGATTGAATGGACATGACGAGCCATCCGACACTACAAAGGTTTCAGCAGAACACCCCAGTAACCAGTGCAGGATACATACACATCCAGATTATTTTTTCTACAACACAAGGTGTTATCAATTCTATACATGAAGATGTCCATTTAAATGTGTTGTGGACATGTACTGGGTATATAAACACCCTGTAGGACATACTTGTTCTTTTGTAAAAGCCTTATGATTTAAGGGATATAAAATGATGGCAGATATGACGAGGATTGGTGGCGACTCCTCTCTAAGCCCATTGAGACACAACTCTGCCAGTGAATATAACTTCACAAGTGATTCTGAGAAGTCTGATGTCAAAGTAGAG…
>EduN_2479
TGAGTTGAGAAGTTATTTAATGTCCCACCAAAGATTGTAGTCAAAATAGTGAAGGCTGTTAGTGCAATATTCTTCCTTGAAAAAGTACAGAATGGTGAACTGGATGACTGGACAAATCTCAGAACATACATGAACAATGACCTGTTACAAAAGATAGCACAGTATGATCCTACAGCTGCTGAAGATCATCAACTTATACCTCCAGAAAAGATTGAAGTACATCTCAAAGATGTGCCCCATGGAGAGGTGTCAAAGTTTGGATCAGTACCTGCACAGCACATGTATAACTGGGTGTTTGTGTGTATCTCTCTCATAGAACATACACTTAAAATGAGGGAAAACGATAACAGTAGTGTTCTTAAATAAAAGTGATTAGTTGGAATTAATAAATAAACAAGT…
>EduN_2484
ACCTAAAGGAGAACAAGGACTTGATGGTCCAAAGGGAAATATTGGTCCACCGGGTCCAGCTGGGCCAATGGGACCACCAGGTGAACAACAGGCCTTCCCAGCTGAACTTCTTGGTAGATACATGAATCAAGGCGACAAAGCTGGTTCAAATGGCCGTAGACGAAGGTCTGTACCAGACTTCCAGAGTGATATGGCTATTATGGTAGAAGACATGGGTTCAAAACAGGTTGAACTGAAAGAAGGAGTAACTCTAGTAGTTAGTAGACTGTTTAGTCAGATAGATCAGCTTAGAGCCGAGGTAAAGAAGATAAGATACCCCTACTGGACAAGAAGACAGTCCAGCACCAACCTGCCGTGACATTCAA
>EduN_2496
TTCATATCCATGTCTTTTAAGGTTTTTTCTTTTCTACTGAGGCACTTATACCCTGGGCACAAATCCTCGTCACCAAAGACTCTCGAATGGCTTGCAGTCCATTTGGACTTTCTACTTCAAAAACATTGGCTGGGTCGTTAGCAATACGAGCCAATTCAGCAGGGTCTCTATAAGGTCCGACTCCTATTGCAAATAACAAGTAGTTCAGAGAGTGAAGCTTTGCCAGCTCTTTCTTTGTTTCATAAGGATTTGTAGAGACACCATCTGTAATGATTACAGCGATTTGTGGAACATCATCTCTAGAACCATATGCTTTATTTAGTCCTTCTGTCCTCAACATTCTTAATGCCTTATCTAAGTAGGTATTGCCTCCTTTCCACTTTATCCTAGAAACGGCTG…
>EduN_2527
CGAGTTGTTCCGATTGGTCGCTAACAAAATCGATCACATGATTATTTCCTGTCAAGCAGCAGTCGAAAAGAGCAGTTATGGTAGACAGAAAAACAACTACCAGTTGTTATTGTGACGGGGTTTTGGGCATTTGTTGGAATAATATGTCCAATTCTCATTCAACTGTTTATGAGAAGATCAGCAAATAAAGGAGTTGTTCAGTTAATGTTAGCTATGAGTGCAGCCTGCTGTTGGTTATTCTGGTTATTGGTCCTTTTTGTTCCAACTTAATCCCCTGATGGGTCCAGCTTTAAGCACCGACTTGATTAGAGTCCTGCAAATGGAATGGACTGGAGATCCAAACCATGCAAGAGTATGAGGCTAAACGAATTAGGGAATCATGTTAAAGTTTCAGATATT…
>EduN_2532
GTCACTCACATATTTAGCCATCATTAATTAATTGTTCACTTAGAAAGAGACATATTAAACATTTTTGACACAAACTTGACATCTACTGACACGTGTACGGAGATTTCCAGCTTTAAGAGTTGCTGGTATTGGACTAGCAAATTGTGAATTTTGATCTATTGTTGTGAGCCAGAAACTGTATTTGTTTGCGTAAAAGTGACAGTTTCCACCATCACCGTTACACTCTATAAATGGAGTAGCTCTGAAATCTTCTAGACAACTGCCAGGGCTGGACAATGACTGACCACCTCCGCTTGGTCCTGCTCCAGTGTGCATAGCAAAACTGTATCCAATCCACATTCCTGACCAACCAATGGGACACTCTGGAATCTGTAATGTTTGACTGTGAACAGCAATTAC…
>EduN_2547
TTTTAATTGAGTATTCAAAATGACAATGTACAGATGAAAATGTAAAACTTAAAACAATTTTAATATCTTATCGATTGAAAACTCCTTTCACCAGAACCCACTTTAGAAACATATAAATGCATCGATTTAATTTGACTAGCTTTCACTTTTCTTTACTTCCGTCAACTTTTTTCAAGCAGAATCTTTTCTTCACAACTTTTTCCATTCTGATTCACAAATTCTTGTGCAAGTTTTTGTTTATTTTTGTTTTTTTCCCACGCTGAGATTCGACGCAGTGGTATACATATAATACCAGCCAGTGCAAGAGAAACACCAGCCATGTAAAATGTTATACTGTAATCTCCAGATTTGTCTGCAAATGATCCTGTGACCGGTGGACCAAGGAATGACGATAAGCCT…
>EduN_2588
ACTGTAAAAATACTGGCTCCACATTGGACACAGGCTGCCACACAACTGAAAGGGAAGATTAAAATGGGAACTCTAGATGCCACAGTCCACACAGTTATGGCCAACAGATATGGGGTTAGAGGATATCCAACAATTAAGATGTTCCCAGCCGGTAAGAAATCTGAGAGTGATGCACAGGAGTATGATGGTGGAAGAACAGCTTCAGATATTGTAGCCTGGGTGAATGACAGATATACTGCTAACCTACCAGCACCAGAAATAATATGAGATTACAACTCAAGAAGTATTTGACAAGAATTGTCAAGAGAGCCAGCTCTGTGTTGTTGCAGTCCTCCCTAACATTTTAGACTGTCAGTCAGCCTGTAGAAACAAATACATAGCAACATTGAAAGTTATGGC…
>EduN_2625
CAACAATAGATTTAATGTACACAATAAATTGTAACTTGTATACTAGTTGTTATACATGTTCAAAATTCACTTGTTTTGAAAAGATTGTTAGAGCATGGTCTTGCATGTTTGATTGACTCCACCTTGTTTTATATACAGGCTGTTTCACCTGAAGAATATGAAGAATATCTCAAGCAACCGGTTGGTGAAGATCTGATTACAGCTGATACCGTAGACTCTGTCAAGAGTGCTGCTCCTGGTGCAGGATTATTTGCACCAGTGGACTTACGTATACCAGTAGGACCTATATTTAATTTTGTATCAGCCTATGTAGTCATGCCATCTGGTAAGAAGGCGTATCCTAAGATCGAGGACAATAAGGATGGTACAGTGACAATCCGTTATCAACCAACAGAAACT…
>EduN_2638
ACTAAATAATTCATAGTCATCAAATAGAAATAATCTAAACTAGACATTTGAAAACATAAACAAAACAAGAGTAACTTTCAGAGTATAACAGTAAAAATAGAAGCGTAAATAATACAGTATCACAGTCGGGCTTCTTTACAGTTGGTTTCCTCCTATCTCTTTTTTATTAAAAGCAACAAATTAAAATAAATGTCACAAATATTATGCTTGTTTAGTTAAAATGAAAATAATAATTAAACATATTTAACATCAAAAGATGTAAATAGTTTATGGGATTTCCTTGTATAAAAGTTTGTTTTACAGAAATTTCACATCTTGTGACCATACATAAAACCGCTGGTCAATATACTTATAAAAATTACAAATAGAGATAAACTTGTGCTGATAGCATTGTTTGTG…
>EduN_2649
ATTTTATTAGATATCAGAAACACAGTTTTTTCTCGTCATACAGATGCTGGTACATATGATCTTTTTTTATTTAATTTACCCTGAGTCCATCAAATCTATCATGTTGCTTGATCACAGAATCAACACTACAAGCAACTTCCGTAATTTGATGTCTGAAGGAAGGTTTGGATAATTTTCGGAAATTTCGCACCCTTGCGGACCATCCTCTCTTAACAGCTCTTTTCCGACGAGTAGATGCCATACCGTTAACTTCACTCCAGTCAACACCACTGCCTACTCCCCACAGCAAATATTTTGACGCCAGCATTCTTTAAGCTCCTAGCTGCGTTCTAAAGTTTTTACTTTTATGCTGAGTATTTTCCGTCAGTAAGGACAATGGCTAATTCGTGGTTCGTTATA…
>EduN_2681
ATATTCCACAGATGGCTGTCAAGAACTTATAACAGCAACTCTTTCCTCCTTCGAAACATCTGTAGCTGTTTCGCCATACACAGTCAATGGCGTGAGCCCCTGGTACTTCTGCAATGGTATCTTCAAAGGCAATCTTTATATGATCATTAATACTATTAGGATCCCGGTTTTCCATATCTAATTGGTCTGCCATTTTTATGGTTTCAAAAGACGC
>EduN_2684
AGAAGAAGAAGCCATTATTCAAGAAATTGATGATGGTCAGTATGCTGTACGATTTATCCCCAGAGAAAATGGAGGTCACAATGTTCATGTATTCTTCAATGATTGTGAGATTCCAGAAAGTCCATTCCGTATTATGGTAGGAAAAGTAGACTGTGATCCAGGAATGGTACATGCTTCAGGAGATGGTCTTAGAACAGGACATACAGGTCAACCAGCTAAATTCTTGGTCAACACAGTAAATGCTGGACCTGGTGCACTTGGTGTCACAGTTGAAGGTCCATCAAAGGTCAAATTAGAATGTGCTAGAAAAAGATGAAGGATATGAATTCACATACACCCCAACAGCTCCAGGAGACTACTTAATCACTATTAGATATGCTGGTGTACATATTGCTGGTA…
>EduN_2685
GAATCAATAATTTCCTGATATTAATGAGATTAAGTCAATGCTATTTCTGTGGTAATCAGGTTATTTTGGGGCAGGAAAACAATGGTTGTTGGGGAGATGCATGACAAGGTAGGAAAATGTTTAAAATCTAATGGGAACAATCATCATATAGGAGATAAGTATGCCAGTCCAATGTACACAACCCAGACAAGGAGCATTGTTACTGAACCAAGGAAAATATTTTTTTACCATCAGTAAATTTTCTGGCGACGAACTTCAATGTTTCGTCCAGTATGATGACTGGGATAGATATCTTTAACACGGCTGACCACTCTGCGAAGTTCAATGGGGTGATCTGGAAAATTGTAGCCATTACTTCTGTGTACAAAATAAGGAAATGAAGAGACATGGAGAGAGCAA…
>EduN_2687
TTTAAAAAATTACAAAGAGAATGTATATTTTACAATATACTTTTTACCTAAATTTAGATTCTTCTAATCAGTCAGATACATATCACAATATATATACACAGGTAGAATGCGTAGTTCTGTGCACAAACTTGGTCCAGTAGTAAATAATAATAAAAAAAACACTAGAAAACAAAATAATAATTAAGTCAACGAGAGAGCAGCTGTTCTCCAAAGAACAAAAACGTAAATAAAAAATGCTGTATTAAGATTCAAGTCTAAATCAGTAAATCAGAGAAATAGCACGATAATTGTGTATTGTATGTATAATTTTAGCAGCAAAAGCCTTAATGCCATTTATATGCATAGAGTTAACTAAAACAATGTTACAACACAACAAAATAAGGGTAAACAAAATAGTAT…
>EduN_2732
GTAGGGTCCAGTTTTAGGAGGAAGTGGGACTCTTGGGGGAGCTGTAGGTCTCGGTGTTCTAACAAGAATGTATCCTGGTCTTCCATTGGTGATGACATAATAAGTACCCTTCCAGTTGGCACCAGTTGCTGACTCACCAAGATCTATAAACCTGTAGTTCTTGTAAAAAGCACCTCCAATGATACCAGTAAATGGATTCATCACATTACCGCTAGCGTCCAATCTGCCTCCAATGTAGACATACTTTACTTCATCAAATACAGAGTGGCTCACTTGATGTGCAAGAGTTTTTTTGCACATTATCAACAATCAAAAATCCACCGTCAGCAGTACGTGTAAACTGTACCACATGATATTTCCCATCATTCAATCTATTCTGATCAAAGGTTATCGTCTGCT…
>EduN_2747
GCTAAACCATTGACTGCTCCACCCCCACCAGAAGAAACGAGAACGAAGGCCTTCTACACCTAAACAAAAGGACAGTAAAGACAATAAAGACAGTACAGTTAAACCTGAAGATGTGATAGTACCATTAGCTACACGACCTCCAACAATTGATGTACCAGACACAGGGAGGAAAGATGGATTACCTACATGTCCTATCATTTTAATTGTTGGTGGCCCTGGGAGTGGTAAGGGTACACAATGTAAAAAGGTTTGTGAACGATATAAGGAAGTTATCCATCTTTCCATGGGAGACATTTTACGAAATCAAATTGCTACACAAGGATCAGCTGATGAGAAATGGGGTATGATTGGTACTTTAGTGCAGAAAGGTGAAATGGCTCCACAGGAAGTAACAGCTGA…
>EduN_2761
ATGTACACTGAATCTTGTGGTTGGATGCACATGGGTTAACAAGTATGATAAACCTGTCCGTTTTTCGTGTCCACATGGACAAGCCATTTCTGTCATCAAAAGTGTACATCACAACTATTTTGAAGATCGTAGATGGTGTTTAGCGTGTAGACCTACTGGTGGACGACACATCAATTGTTACTGGACTCCTCATTATGTGAATGACTGGGATAGATTCTTCAGCTTTCAATGCAACAATTATGGATTCATAGTTGGTATGCAGAGCATCCATCACAATCACTATGAGGACAGAAGGTTTAGATTTAAATGTTGCTCAATTGCTGGAAAGGATCTCAGTCAGTGTCATAAAACCTTCAGGAATCAGCTCGACAAACCCAATACAGTGCATGTACCAACTGG…
>EduN_2767
CTGCAGTCTGCGTTCCTCCAACCGAGTTCATGGCTATAGAAACCGACACATTTTGGACTATTATTGGTCAAGACCGGCCATCCTTTTGTGAACTGAATGAAATCAGCATGGTTTTTTTCATGAGCCCAGATCCATTTATAGGGGTCTTCTGCATATAAACCTGTCCAGCGATAAGCATGTCCTTTCTTGCTGGCACGCCCGAATAGCCAACTATTTTCTTTTGCATTATCGATTTTCACTAAGTAGCCACCGATTTCCATGCATCTTTTCTTGGCTCCTGGCCACGTTAACTTATCTTTGGAGAAAATATAACAGTGTCCATTATGTTTTTGTTCCGCTGACCTATTTTCGTTCGTAGAATATTTTATTCACTTCTTTAAACTGTTTCTCTAGTTGTTC…
>EduN_2778
GTTTGTCTATGCTCATGCTATGTTCAATTCTTTCCTTTGTTCGTCCTTTTTAATTGCATGGAAAATGTAACACCATGTGACAGACTGCACTCAATAAGTACATTCCTCCCCCAAGGTAAAATGAAGCATCATAGTTATTTGTTGCTTGGAAAACTGCACCTGCTAAAGGCGGACCGTATATGCCTGACACACCTCTTGCTAATATGAGTAGACCAAAACCATTCGACAGTTTACCAATTCCAAGGAGATCACATATTATAGGAGAAGTCAGGGAAATATATGCAGCTATACATAAACCATATATGACAGAAAATCCAACCAGCATTGCATAGGTTGTACAAAGTGGCTCCATAAACAAGACGACAGCGCTTAGTACTAGCATTGCATTGTTCAGAATTA…
>EduN_2802
GTCAACCAATACAGATCAACAGAATTACACCTATAGTCCTGTCAATCAACATATCCATATCATACCTAGCGTTCTAGCATGAATCAAATAATAAATTATAAATCACAGCTTAAGTTTATTTGGTGTAAAAGTAGAGCGAACTAAGTAGAAAAAGAATATACCATTAATGAGATGTTCCCACAAAAATGATGAGTTAAAATATACAATTTACAAGACATAAAACAGTTATTCTGAACCATTCATAAGTCCATTCAGTCACTCAGACATCAGCACTAGCACTCCATTACAGGTTTACAATTCAGTTTTAGATTTCTTTGACTTCTTCTTTTTCTTTTCTCCTTCATATTTAAGACCATCTGTAGATTCTTTTTTCAAATATTCTAGAAAATCGGCAACCTC…
>EduN_2808
TACGCCTTGTGTGGTATCCATAACTCGAGTCCAGTAACTACCAATATTCCTGCAAACTTCATAATAGGCCAGTTTTCCTTTCTGAAGGCTCCATTGCCCCTCCTTTCCTAGACCCAATGCAGTAGCTCCTACCATATGTGTTCCCGGTGAAGTTTCGTATGTATTACCATAAGCAGGTATTCCAACTACCAGTTTGTTTCTTGGTAATCCAGCATTAAGCCACACATTTATGGATGATTTCACATTCAGAATATTTGTGAACGAATTCATACTATCGGCATCTAGAGCACTTCCATGAACAATAATATTTTTATGATCTCTATTAAAGTTGAATGCTGCTAGATTGACAAAGTTCAGATATTGACTTAAAGAAGCAACATCGTATCGAGAAATAACATC…
>EduN_2825
CAAGTATTTAACTAACATAATTGAAACGATGGATGAAATAAATATTAAAGTCGTATTTCACTATACGACTATTTAAGTATGTACATGTTTTAACAACGTTGATTGAGTATTGCATATCACATTGGAAGGTTATGAAGTCACTATTTAGCCATCATCATGTCAACAAATTCTTCATAATCGATCTCCCCATTGCCATCTTTATCTGCTTCTGCCATCATTTCGTCAATTTCCTCCCCAGTTAACTTTTCTCCGAGATTTTCCATTACTAAGTTTTAATTCTGTCTTTACTTATGCTTCCACTACCATCCTTGTACAAAAACTTTAAAAGCCTCCCGCAATTCCGCTTCTTCATCTACGTCTTGCTAAACGTTTAGCCATCATTTACCAAAAATTCAGAAA…
>EduN_2838
GACGATTCGTGGTGTTTTTCGTGCATAATCATTTGCACGTTCTCTTCTGTTTTATTGAATATATTATCTTCATCAGAATCCCACCATAATTTTTAGTTTTTGTTACTTTTGCTGGGAAGTCTTCTGTGTCATATCTGCTGGACAGAAGGAATTCCATTATTTTATTCATCGAAGCGTTTTGACACGCAAATATATACTCGTACAATAATCCAGCAACAACACCTCCCAAAATAGGACCAATCCAGTACACCCAGTGAGTTTTCCCAGTTGTTCATGGCAACAGCTGGTCCAAAACTTCTCGCAGAGTTCATACTCGAACCAGTCAATGGTATAGCAAACAAATGACACATAGGTTACAGAAAGCCCAATAGACAAAGGTCCTGACCCTTT
>EduN_2882
GGCAGCAACAGTTACAGCATAGACTTCAACAAGCGCAAATGTTGCGGAGGCGAATGGCCTCAATGCAACGGACTATTACACCTAGTGCTCAAAACACAACACAACAATCTCCTGCCGCAACAGGAATCCAACAACAACCAGTTTCATCAAATTTCAATTCTGGTAAACCTGTGGCTGGACCTCCAGCAGCTGCTTTACAAGCTGCAATGGCTGCTCAAGAGGAGGCTTCTCGTCAAGCTAGTCTTCAGTCTGGTGCAGCAAGTGTGGCTACTATGCCCCCACCACAAGTGCAAGCACCAGCTCAAAAAGTACCAGTGAACACTGCAATGAATAACTCTAAAGTGGTCTGGCCACCAAATTCAACCTACCAAACAATGCCTCAAAATCCCATGAATCCAC…
>EduN_2901
AATATTTATTCACGTTCAAATCTCGTTGAAGATAAGGAATAACTCTTTTATCAACAGTCTAAATGCAATGATTCTGTTGTCCAACATTCTCTAGGTGAAATTGGCCGCCCATCCTCATCAATTGAGTGAATCGAAGTTATTTTTTCCCTTGCCGTGCTTCGATTTTGTTGGGGATAAAGAAGAGGTAACAGGAGGCGGAGAGCTTATTCCCAAACTGATTGTGTCAAATTCAAATCCATCATTACTAAAGTAGCTACTTTGAAGAGTTATTGAGTTAGGGTTCAATCGAGGTTTCCCATTTTTATCACAGTTGCTTTCAAACTTATTGTTTTCATTCTGTTCAAATCCCTTTTTATAGGATTTGAAAATTCCCTTTTGTCTACAAATCACCATAATGAC…
>EduN_2920
CTTTGGTAGCTAGATACAGAATGTATTCTATACCGTCCTGTGATGGTGCTTTTAAACTTTACAGAATACAGGGAGGATTTGTATGTCAATTTCCCCAACCAGAAGGCTGGCTTCTTGTGGCACGTCCATCAATTACAGCCTCAACTGGCATGTATCTAGGATTAAGAACTGTAGGTAATGTGAACCTAACTGCTCCACCTGGCTGATATGATAATTCAACAGCGTAACTCATAGTTAATAATGCTGTCTCTCCTCCTGGCAGATTGCCAAGTTTACATTCAAAGATGTCACCGGCTGTATCGTCTTCCTCTAATAGCATTGCCGTGTGTCCATGAGAAACTGCTTCATTGTAAGTTCGTCTTGCCTCTTCCTTTTCCTGACATTCTGCGATAATGTGCT…
>EduN_2935
CAAATGTGTGTATCTGTGGCACTGGGTGTAGCGGTGAAGGTTGTCGCTGTGGTGACGCCTGCAAGTGCTCGGGCGCCGACTGTAAATGTTCCGGTTGTAAAGTAGTTTGCAAGTGTTCAGGTAGCTGTGCGTGTGAAGCAGGATGTACAGGACCTTCAACGTGTAGATGTGCACCTGGTTGCTCCTGCAAATGAATCAAAAAGACAATATACTCGAACTTATTCCATGCATCAAATCATCCATTATGTATTAAAATTTCATGTTCAACTACTTACATTTATTAGCTTATTGATCTAAATTCCAAGCCAGAGTTATTTCGCTTAGAGTATTGTGCTGCTCTTTTCCTCGAATGTGACGGGACAAATTATATTTATAATTTAATTTGTACCACCTTGACCA…
>EduN_2945
GTTCTACTGTTGTAATTAAAGTAAAACTGAAGAAAGCAAGTATGAGAAAGGGTAATCTTGTAGTGTACATTAAAAAGAAGAAGAAAATGATAAAAGGAAGTTTATCAAAAAAAGAAAAGCGGAAGTTAACCCCATCATAGAAGATGGCGCATCGTGCGATTGTGAATATTTAAGTGCAAATAGTACTTCCAAAAAGAGTTTTATTATAATGGGAAATATGACCGATGAAGGAGAACTTTCACTTGTATTCATGTCAACTTGGGAAAGAAACAAGGGTTTCCGAAGAGCTATTCGAATGATGAAAAGGGGCGTATCATGTGACAGTGACATCATAGCAATATCAGATGGCTCGAAAACAGACAATTCGTCTGGTGGTGGTAAGACAAAAGGAAAAGAATA…
>EduN_2946
CTTCATGGAGGAAATGTTTGATGACCTAAAATCTCCTGATATTATTCTCATCTGTTTTAGAATTTCTCTTGTTAAGTTCTGATAATTTACACGTGTTTTTAGTCGAGTATACTCTAGACTCCCAAGGAAGTGTCAAATTTTATGGTAATTTCAAACTCATATGAATATATATAATTAGAATCAGGATCCATACAGACATGACCACATCCGTTAGAGCAACATTTCTGGTCCCCTGCACAATTATAATCTCCTGAGCATTCCTCCACACATATACCAACAGTATAGTTACCAACAGCTGGACAGGTTCCTTGTTTGCCACTTGTATCTCCATTACAGCTAGAAATCTCCACTCTACCCTGGGTTAACTTTCCAAACAAATCACTCACTGCACTTAGACTA…
>EduN_2950
GCCATATTCTGAATCTAGGGTATCTTGGAATCGTCTTAAAGATCTTTTGATTCCCTTTTCACCTTGGAGTCCATTAAATCCAGGTAATCCAGTTTCTCCTTTCTCTCCTTTCTCTCCTCTACCTGGTTCTCCTTTTGGTCCAGCTGGTCCTTGTGGTCCTGGTACTCCTTCACCCATTTGTCCCGGGAAACCATTGAAACCTCGATCTCCTGTCTTGCCTTGATCTCCTTTCCGTCCAGGGGCACCTGGTGGACAAATACAATTACTCTGACGTTTGACCCGATCATGTTCTTCACTGTTAGGTAAATATCCTACATGTTTTAATTTCTTATTTAATAATTTCTCTACTTGTCTTTCTGCTATCACATTTATTTCATTTTTATAGTTTGAGAATTCATT…
>EduN_2973
CTTTATCTGTAGTATACGATTCAGGGAAAAAGAGGAAGTAATATATTGTAGATTGCTGGTTGCAGAGAGAGTGACCGGTGAGCTACATGCTGATCCTGCAAAATCATGACCACCGATTATTTTCATATCAAACCCTTTTTCAGTAGCTGCTGATATACCGTCTGATACAAATTCAATATATGCCGATTCCGCTGTTGTTACCATGAATCCACTTGTTTTGACATTTCCATTATCTGAACAATGGTTATCTCCCAGAGTATTAGCGGAACTGTTCTGACCGTCATGAACGTTGACTCTGTCACCACTACATGAAACAGTGTTCTCTGTGCTCATTATTAACAGAACATCACCTTGTACTTGAGTTCTAGCAATCCAAGAACAATTAAGATCTCCAGCATA…
>EduN_2977
ATAAAATATAATTTTAAAAGGACGGGAAATAAGATGGAACTTAGCTATATTTTATCCAATTTAATACTGTGGTTGTTCTTCCACCTAACTTGGGGAGAACCTCTTAAGAGGTATCAGACCCCGTGTCCTAATGAATGTGACTTAAAAAAGTGTCCAAAATTACAATTCTGTGATGGGGAAATAGTGAAAGACAGATGTCGCTGTTGTCCGGATTGTTCGACAAATATTGGATTCAATAGTACTTACGCTCAAAAAGATGGTGCATGTGAACAAGTGTCGTGTCCCAGGTTCAAAGTGTGTATGGAAAACATGCAAGGATTGCCTCTTTGTACTTGTCCGAACCCATTTGTATGCAAAGGCCGACGGAGACACGTATGTGGCAAAGATGGAAATACGTAT…
>EduN_2984
AGGTCCCACTGGTCCAACAGGTCCTGCTACTCCATTACTTCCTGGTAGTCCATTTTCACCTTGTGGTCCACTAAACCTCTTGGTCCCTCAGGTCCAACAACAGTGTCACCTTTTTCACCCTTTACTCCATCAAGTCCAGGCAAACCATCTCTACCTGGGATACCTTCTCTTCCGTCGCTTCCATCACTACCATTTTCTCCACGTTCTCCTGTCTCCCCCTTTTCACCTTTTCTGTCCTTGATCCATGTGCACTTGAGATAAAAATGATGTCGACAATCTCCTGGGTGTTTACTGAAGCAGGCAAACCAGGGTCACCTTGAGGTCCAACTTGCCCAATTCCTGGCAATCCCCTATCCCCTGGGTCTCCCTTTGGACCTTGGATTCCAGCTGGACCTTCTG…
>EduN_2995
ACCCTACGATAACATTAAGAACAGAAACAGGAGATCATATGCAGGTATGGTATCAGCAATGGATGAAGCTGTCGGTAATATAACTGAGACATTTAAACAGAAAGGACTATGGAACAACACGCTACTTGTTTTTTCTACTGACAATGGTGGACAAATTCTTTCTGGAGGAAATAATTGGCCATTGAGAGGATGGAAACACTCTTTATGGGAGGGTGGAATGAGAGGGGTTGGATTCGTTCATGGTAATATGCTGAAAAATAAAGGAACCAGTACAAAAGAATTGATGCATGTGACAGACTGGTTCCCTACACTGGTTGGTCTTGCTGGGGGAGATCTCAATGGAACAAAACCTCTAGATGGCTATGACCAGTGGAAAACGATCAGTGAAGGGGTGGAAGG…
>EduN_3017
CAAAGCACTGTAATAAATTTTTGCACTCTTATTGTTTTGCACTTTCGTAAATAATAAATTAAACAAAACATAATCGGTGAGTCTTTGAGCATTTTCATATATCGGAATCGTCTTTTAAGTTCTCGTTACTCCAACACAATCTTCTTTACTGTGGGTCAACAGTCTGTGCAAAACCTACTCTGTTGTTTCCAAGATCGAATTCTGTGTAGAATGGTCCAATGAAAACATCTCCAAGAATCCATAATGGACCGAGAGGGGCGGGTACATTTATTCCAGCGAATCCACTGAGACAAATTGTTGTACCTTGTTGACTGACCTGTAGAATAAGCAGCTTTCCTGTTAGGGTAAAGGTGGTTCCTCCCAAAACAAAGCTTATTGGTGGTAGGCTGTCAATTTTGC…
>EduN_3025
GAACTATTTTACACAACGTGTAGCTAATATTACTTTTACTCATGGACTGAACATGGCTGGATGGGAGGATGGGTTTAATGCGGGAGATGGCATGCCGTTTGATATAAGCATGTATCAGAACCAACACATCTACAGTAATGCCTGGGATAATGTTTGGGAATGGGGAGAAGCTAGACGTGCATATAACTATGCCAATGCTGGTTACAAGGTGATAATGTCACATGCAACTCACCTGTATTTTGATCATCCTTACGAACCTGATCCAGAGGAGAGGGGACTGTATTGGGCCCCTAGATTTACGGATTCTTATAAATCATTCAGATTCCTGCCGGATAACTTATATAGAAAACATAGATGTAACTCGAATGGGAGTTCCACTAAGTAAATACTGATGTCTGC…
>EduN_3030
CTTGTTTCTCCACATGGCACAAAATCTACAATTCTTCCTGGCAGAGGTCTTGATCCTACTACTGAAATGGACATAACTGTCTTAACTGTTCAACTATGGGGAGAAAATCCAATTGGATACTGGACATTAGAACCCACAGCTGTGTTCGGTAAAAAGTCTTGGTTACGGAACTGTAGAATCAGCAAGCCTATTGATACATGGATATGCGTGTCGAAGTTCTGTAGAATGTCTACCACCTGCTGAACAAGATCGACCATCACCAACAGTTAGATCTCTGCCAGAGCAAGTTGATAGAACACAAGATGTGGGTTCTTCATTAATGACAGGAAGGAGACGTGGTGAATGTCCATCTCATTTAACATCAAGCTGTGTTGAACAGTGTTCTTATGACAGCGATTG…
>EduN_3063
TATTTTTTGGAACTTTGTGTCTCCCTATTAAAACTGGGAATGGATCTCGGCCATCATTGGCATTGTGTACTTCTCTGACTTCTAGGGTGTCGTCTACTAAATAGTAATGGATAACAAATGGTCTCATTTCACCAAACATCTGATTTGTATCATCCCAAACAACATACAATCGTAGGACTTTTCTGTCAGTTCCAAGACTGTTTCTTGGCATCAAATGCTGAGGCAGTGGTGTATGTTCTGAGTGCAGTCCTTTTTCCTTCCTTCTATCAATGTATGGATCTGAGGGTAGATTCTCTCCTGGGTTCACAT
>EduN_3119
AAAATAAACAAACATTTATATATCATTAACAACATAAAGCTCATCAGAGTTGTAAATATATACTAAAGCATTAAAAAATTCCATTTTCAATATGGCCGCTTGCAGCAATGAATGTCAAGGCCGTTCAACTCAAACCTGGTGTTACAACATGTTCTTGATGAAGTTAATTACCCTAGTTATTCTCATCAGATAACTAATCTCGTTAATTCTAAAATTAGATCTTTTAAACGGTCATTGGGTTTGTTCATCTGTGACAAAGTTCTGTATTTTTACCAACATGAGAGTTGAAATAAATGAAAACATTTATAAAAACAAACAAATTATATACGTCGCTTTTCCAATATTTCTTTACACATATTTGTAGCTGGAGAATGCCAATATATATGAAAAACAAATAAT…
>EduN_3125
CCACCACCTGGAGCAAGAATGCCACATCCAGGTATGCCACCAGCGAATCCTCCAATATCTTTGCCACCACCTGGCCACCCAACAGCTCCTGCACCACATGTTAATCCAGCTTTCTTTCCTCCACCCCATGGAGGGCCACCCCCTGCTGTGGCACCTTTACATCCTGGAGGAGACCCATATGGAAGGCCACCACCAGTGTCATATCCTACAGACCCTTACAGACCTCCAGATCACTACTCTAGACCCCCTCCTGAAAGACCAGAATCACCAGCCCTCAGTGAACAAGAATTTGAAGAGATTTTCCAGAGAAATAAGACTGTATCAAGTAGTGCTATATCCAGGGCTGTACAGGACGCAAGTGCAGGAGAATTTGCAAGTGCAATAGAGACATTAGTGACG…
>EduN_3142
GAGAAACGAGAAATTTACTGTCATAACCAAAGGACGTTGGAAAAGACAGACGGACCTGCTAAGGTCACAGCTACAACTCCATCTAAGAAGAAAGTTGAGGTCCCATTGAAGGAAACCCCAGAAGGTTATGTAGGTAACCTGACCCCAACAGAGGTGGGAAATACACTGTTGATGTCTCTTACGGAAGTGCTGTTGTACCTAAATCTCCATTTACCGTTGATGTAACACCTGGCGTTGACCTTGGCAAGGTCACCGTTACAGGACTTGATACTCCAATTAAAGTTAATGAGAGACGAGATATTGCTGTTTTAACAAAGAGCGCTGGCAAATCCGATGGGCCTGCTAAGGTTACTATGACAACACCCACTAAAAAGAAAGTTGAAATTCCTCTCAAAGAAA…
>EduN_3153
ACTAGAGGTCAAGGTACGGTGTACAACACGGAACATTGGCTGACAACGAACACGAAGACTATAAAGGACCCCAAAACCAACCAGTTTAAAACCAATCACACGGGAAAAACAACGGTCTAATCTATATGAAAAACAAAGAAACGAGAAACACTTATAAACAATTTAAACAAACATGATTTTGTAGAACTTACTTAGGCTGATAAATTTGGTCCTCCTTTAAATATCCTATTTACCATGTGTAAGTGTATACGACCAAATGCTCAGGCGGGAATATGTGTACATTTTACTGATACAACATGTGCAACTTATTTATTCAAAAGAAAGACGACTTTTAATTGCAAAAAGAGATAACAAATAAGTTTTAATAGCTCCACGTTCGAAAACTGGTTACTTGATTTT…
>EduN_3155
CACATCACCTAGAGATACCACACCTAAAAACTGTGCAGTCAACAACGGAAACCACAACCCCGTCCAATCACTACACCTGGAGAGACCACACCTAAAACTAGTGCAGTCAACAACGGAAACCACAAGTCCTTCAAGCACTACACCTGGAGAGACCCCACCAAACACTGTGCAGTCAACCACGGAAACTACCACTCCGTCAAGTTCGTCAACAGGAGAGACAACACTAAAAGACATGCAATCAGCAACGGATATTACAACCCCCTCAATCACGTCAATAGGAGAGACGACACCAAAAAATGTACAGTCAACAACGGCAACTACCAATCCCTCAATCGTGGCAATAGATGAGACAACAACAACAAATATACAGTCAACAAAAGGAACTACTACCCCGTCAAT…
>EduN_3180
AACAAAAATGAAGCTTAGCCATGTGCGGTGGGGCCTTTTAGGCCTGTTAGTTGTGATATGGACTGTGGATGCTCAATCAGAAGATAAACCAACAAAATGTAGGTATAGAGGTGAAGAATATGATGTTGGTAAGCCATTCAAACCTGATCCTATAAATGTACCATGTTATACCTGTGAATGTACACCAAATCTAAACTCAAATGGACAACTGGACGTATTCTGTCGCACGGAGACATGTGTTGCCTTAAACTGTAAAGAAGACACACAAGAGGTCCGTTTGGATGGAGACTGTTGTCCTACTTCATGTGAACCCATCTTGAAACATCC
>EduN_3188
GTTGGAACAACGCGTACATTTGATCCGACCAAACACGATGAAAAACATCGCCAGCAAATAGAAAATCAACTTATATGTAACCAAATATTTTCCAAATTTGTTTCGAAAAACGAGGCAATTGAAGCTGGGAAGAGAGTAAGTCGTGAATTTAATACGGTGTACAAGATTCAAAAAGCTGTCGGCTTTGAAGTGTATGTGTCCACAAACGAAGATCCACTGTACACAGATGATGAAAGCTGCACACAACCT
>EduN_3197
GTCCCGTTCTAAGACCATCTCCTGAAGCATGTACCATTCCTGGATCACAGTCTACTTTTCCTACCATAATACGGAATGGACTTTCTGGAATCTCACAATCATTGAAGAATACGTGAACATTGTGACCTCCATTTTCTCTGGGGATAAATCGTACAGCATACTGACCATCATCAATTTCTTGAATAATGGCTTCTTCTTCTGTTCCAGAGGGAGCTACCACTTTAGCCTTCAGTTTTCCCTTTGAGCATCATTAAAGTTTACAACAAAGGCAGCTGGTTTTCCTACTTGTAATCCCTTCTGTTGTAAAGCACTAACAGATATTTTACGAGCATCTCCGATACTTGGACAAATGTCTACTTTGAATGGAGAATCTGGGATATGTTCATCATTAAATTTGAT…
>EduN_3211
ATGAAAATCACATTTTTGAATATGAATGAACATTGCACGTACAAAGAATATGGACGGACAAAGAAAATGGACGGACGAAGAACATGGACGCATTGCAGTAGAGTAAATAAAGGATATTTAATATAATGACCTAGTGGGCCAGTTAACCTCAAATTCCGCGCATCATGCAAAACGAGTTGAACATTGACCTCCATTTCATATTAAATATAATAAAATGTTTCAATTCTACAGCAAAAAGGCTGGACTGGCCATGGCATCTTTGTAGTCAAGAACGCGTTGCCAGGTTGTACACATTCGTCGTAGTTTTAAATCACATGTATTACATTATTTTTCTGTAGTTCCTAGTTTATAACAATATCATCATTTAAAAATATTGTTTTGAGTATGATAGTACATTTG…
>EduN_3212
CTCCAATATCCATACACAATATTTTCACAAAACAATTTTACTTTAGTCAATTGAATAAAATATAGTTCAATGCGCCTTTTCGTCTGTTCTTGATACACATATCATGTTTTATTGCCTGACATCATTTTTACAAACTCTTCGTAATTGATTTCCCCATCCCCATCTAAATCAGCCTCTCGTATCATCTCGTCCACTTCCTCGTCTGACAATTTCTCTCCCAAATTTGTCATAACATGACGGAGTTCAGCTGCACTTATCGATCCATTACCATCTTTGTCAAATACTTTAAAAGCCTCTCTTATTTCTTCCTCTGAATCAGTATCCTGCATTTTCTTTGCCATCATGGTTAAAAACTCTGGGAAATCTATTGTTCCGTTTCCATCAGCATCCACTTCATTT…
>EduN_3218
CCTGCTGAATCTGTTACTGTATACTTTACTATTATACGTGTTTACTCCTTGTTTCGGATGCTGACAGTGGACCTGTTACTTGTGTAGGTTCCAATCCCTTGTCTTTGTTGTCTATAACTACTGGTTTGTCCCAGGAGATAAATACAGTGTCTTTATTATCTCCAGGATAAAACATTAAGGTATTTGGACATTGTTCAAAGGAAGGTGGTTCAACGTCAATACAATCCGGATCGTATCCATTCCATGTCCCTGATGCCAAACAAACTTTAGTTCTCCTCTGATTTGAAGGAATATCAAATCCGGCATCACATCCATATGTACAAATAGATCTGAAGTAAAAATCTTCCGTGCACGAAAAACTTAGCTGACCACGTTGTACAATTGGTGAGCACTGTTTCT…
>EduN_3254
CCCATTGCAGTATAAACAAGTCCTTTCCAAATTTTATCCTCAACAGCTCCTTGCTCAGGGAAATAATCCACAAAGGCGTCCCATCCTCCATTATCAAGTATCCATCTACCAAGTTTATTTGCTACATATTTTCCAGCATACAGTGAAATTCTTTCATCACAATCTGGACAGGAGTCTTTACAATGTTGTGCTAATCTTGCTGCGAATGTGTATACTGCTACTATTCTCCCCCAATTTATTTGTCCCGTCTTCAAATATTTCATCGACTACTGAAACGAAAGTTGGAAAAGCGTTTGTTTCTGTTATTTTTAACTTGTTTACCATTCCCTTGAAAGCAATATCATGGCGATTTGAAAGTTCGCGAACAGTTCGTCTCATTGTTTTGTCAGTACTTATTGG…
>EduN_3256
GTGGAAGATCAGGACCCACTGAAGAGGAGATTAAGGAGAGAGTTAAGGCTATCTATATAGCTGAGTTATTGAGACGTATTGATAGATCTGGTACCTTAGACGTCACAAGTGGAACAGTCGTAGGATATCCATACTATACAGAAGATGATCCAGTGTTACTAATTTAACACAAGAAAAAACGGATATGAATTCGAATAAAGAAGCACCAACTAAAAGTCGGGACCCAGAGCTTGACTGTGAATATTTGAGAGATCGCCCTCAAAGGATGGGGTACAAATGAAGACGCTATCATCCATGTTATTGCAAGCAGATGTAATGCTCAGAGACAAGAACTGAAGAAAAATTTCAAAACAGCTTATGGAAGGGATTTGATCAAAGATTTGAAAGGAGATTTATCAT…
>EduN_3270
TGTCAATGAACCTGCCTACTTTACTATTGTCACCAAGGATGCAGGAGCAGGAGGTCTTTCTCTATCTATTGAGGGACCATCAAAGACTGAAATCAAATGCCAAGATAATGGTGATGGTACATGTACCGTCAGTTATGTACCAACAGCACCAGGAGAATACCAGATCACCGTGAAATTCGCTGGACAAAACATTTCTGGTTCACCATTTACTTACTAAAATCACATCTCCACCAGGAGAAATTAAGAGGAAGTCACAATTTGGCCGTAGCAGTGAGTTTGAACTGAAGATTGTTGAGGAGGATATTGGTAATTTGATGGCAACAATTAGAACTCCATCTGGTACTGAAGAACCATGTCTACTCAAGAGATTAGCCAATGGTCATCTAGGAATCTCATTTA…
>EduN_3277
CTCTTCTGAGCTTCAGTCTTCTGCCAGTCTTCCATCGCCATCATAGCACGAAGCTCTCGATTCAGCAGCTCGAATCTCTGCTCTAAATCGTCTTCTTTTTCTAAAATATTAAGCTGCATCTGTCTTCTTATCAAAGCATTTCTTTTGTTGACCAATAAAAACCACTGCTGCATCAACTTTTCTTCTAAAGACTTGTTGTTTCCATTCATGGCCTTTCTGGAGTTTTTCCTCCAGTAGACCTGCCTCAGCATCAATTTGTTTCTGTTCCCGGTCCAAGGCATCCATTTCAGCAATTACATACTGATTAGTACTTTAGAAAATTCTCTATTTTTCTTGTACAACTAGTTCTTCTTCTAATGATTCTGTGTTATC
>EduN_3284
CTTTTCTCCGTCTGTGTAAGTCCAAGCTCATCTGCTATTTGCATAACATTATGCTTTGCAATTTTGCCCTTTTCTTCATAATCAAATAGTTCAAATGCCTTCAACATGTCTTCTTTTGTATCTGGACCTGTCATTTTATCTGACATTATTTTCTAGAAAGTCGTTGAAGTCCAGAAGACCGTCTTTGTCACATTCTGCCACCAATCGCTTTAATTCTTCCTTAGTTGGTTCAAACCCTAACGCTCTGAGTGCTATCTTTAATTCACTCCCATCGATAGTCCCAGAACCATCCGCATCAAATAGATCAAAAGCTTGTCGGAGGTCCCCCTTCTGTTGATTGTTCAGTTGTATTGTAGCTGGTTTGGTTTTATTGTCATCCATTTCATTTATTCCATATGC…
>EduN_3286
ACCAGCTGGCCCACCCTGGGCACCTCCATGAAGTTTTGTCATGACGGGTGAACATACTCTCTGCAGTTCTTTCATTTTGTCTTCGTATTCATCTTTCTCTGCTAAGGAGTTTTGATCTAACCATTTAAGTGATTCTTCACAAGCTGTTGTAACAGTTTGTTTTTCCTCAGATGTCACCTTGTCACCAGAGTCATTTGCCGCTTGTTTAACACTAGAAAATATAGTTCTCAAGTTGATTCCTGGATGAAACTCGCTTGTTTTTTGTTTTTCATCTTCGTCTTTGTATTTCTCTGCTTCGGAAACCATTCTATCAATGTCTTCTTGGCTAAGCCTTCCTCTGTCATTTGTGATTGTAACTTTGCTTTGTATTTCCTGTACTTTTAGTCTTTAGCCGATACG…
>EduN_3295
GAAAATCAGGAATATAAGGAGGAATTAAGAAGGAAAAATGCAAAAATATATGAAGCTGTTCATGAACGAACAGGTAGAAATCAAAAGGAGATAACAGTAGAAAAAGGAGATATTTTAGAGGTATTAGACGACAGTAGAAATTGGTGGAGGCTACGAAACTACAAAGGTGATTCTGGATAACGCCCCTTATACAATTCTACGAGATGCTGGAGATGATCGTAATGATATTGATCGGTTTCTATGAAGCTAATAAAGAATGGTGGACGAAGAGGATCTATTGGTGGATATAGTGGAAACATTAACCAATCAAATCACATCCCTGTTGCACCTCCACCGCCCACGCAAAGGTGATTACTTTTGAAAACATTCCATGTTATATAAATGCAATTAATGGACATA…
>EduN_3298
ATATTGGACCGACTGTTGCTACGGCAGATTTTAAAGTACTTCTTCATCCCCTTCTTTATTATTTTATTCCTGTTACTGTAGCTCCAACATCGGATTTTTTAAATCTGCAACTAGCATTCTTAGCTTCATACGGGTAGGCTGACTCTGTATCTATTCCATTATTGTCTTTAACATATTGGTATGCCCGGAACACAAACCCTCCATTACAACCACCATTACCATACTTAAATGTACAATCTACAAGGTTCTGTTCTGATAAAGAAACCAATTGTCCTGTTTTCCTGAAATGTTGACCTTCCAAGGCACCAGTTGATGAAAATGACCAGCATGATCCACATTGTCCCTGGTCTTTCACAGGAGTAACATAGCCTTTTTGCCTCCAGTCAACTTCATCGGGAA…
>EduN_3328
ATATTCCACAGATGGCTGTTAAGAACTTGTAACAGCAACTCTTTCCTCCTTCGAAACATCTGTAGCTGTTTCGCCATACACAATCAATGGCGTGAGCTCCTGGTACTTCTGCAAGGATATCTTCAAAAGCAACCTTAATGTGATTATTTATGTCATTAGGATCTCTGTTCTCCATATCCAAGCCCATGGCATCTCCACTAGATTGTTGTTGCTGTGACATGCTGAATTGGTCCAAAACTTTCGTTC
>EduN_3383
CTAAAACATTGGGCCAGAAATCTCCCTCAAAATAGGGTATTTGTGTGGCACATTTTATATTGTTTTCGATTGCATCTTTTAAAATATCCTTATAATCAATCACACATCTTTCAATAATAGCTTTATCTAACATCTTTTTATACCATTCTTGTAGACGTTTGGGTTTTGGAATTTTTTGTTCTGGTGGATGACAATGAAATATGTAATCATCTCCTTCACTTGGTGGACAAGCCCAAATATGTGCCCATGTGAATCCCATTTGTTTGGCATATTCTAAATAACCAATAAGGATTTCATGATAAACTGCTGTCCTGAGTTGTCTTGGTTGGAAAAAATGTACACTGTCTAAATATGATATGTAACATCTCCTATTATTTGGTGCATAACAATTGGAATCAT…
>EduN_3385
GAAGAAAGTCATAGCAGCAATGATTTTGGGGTGCTTTCTAGTGATTTTTGTTGTCCCGTCGTATGTTTTTGGTTGCAGCTAAAGGACCCAAAACGTTAACTGACAAAGTACTATTTTGTATATAGAAATTAGGAGGAGAAAAAGACTGGCAGAATTGTAATTGGTTTATTTGGAAAGACTGTCCCTAAAACTGTGAAGAATTTTAAAACATTAGCAGAAGGAACTGAGGAGAGAGATGGTAAAACATTAACATACAAAGGAAGTAAATTTCATCGAGTTATTAAAGATTTTATGATTCAAGGAGGTGACTTTACAAGAGGAGATGGAACTGGAGGTAGAAGTATTTATGGAGAAAAATTTGCTGATGAGAACTTCAAGCTGAAGCATTATGGATCTGGA…
>EduN_3400
ATAAGTTAGAAGAGAGGTTGGCTGTTCAAACCTTTCTTGTAACTTGTACCATTTTGATGCAGAATCTCCAAATCTGTAATAGTCAAAATTGATGGTGACCTCCCCAAGGAAATCGTTCCTTCCAAATCTATCATTGTGCCAGACAGTCACCCATAAAGTTCTGTTCTCCAGTTCGCTCTTAGATATCAAGTATCTCAACTTTTCATCAAATACAGGATTAAGTGTGTGCTTCTTGATCTTTGTTTTCCTTTTTCCACTTCTTGTCTTGTCTGGCAACAAATACGTCTTTATATACGGGTCAGATCTATTTCTCCTGGTGTCTGCAGGTGCTAATCCTTTACACTGCGTAATATGTATCTCCAGCGTCCCTGTTCGGTAGTTATAATCCATACCAAACTG…
>EduN_3404
GATTGACTTCCAGAATTTAACAATACAATATGGCTTGCTACCGGTTTACCAGTCCTACGGTCATAGGTCATCTGGAACTCTACCGGGTCTCCAATTTTAACCAAGTTAATATCATCTCCATATTCACTAAAATGAAAGAAGAGTCGTGAATCCCTTTCACAACACTGAATAAATCCATAGGAATGCAAAAGACTTTTCTAATAAATCCTGTTTCTCTCCCTACTCCATTACTGTTGATGTGTGAATTGATCACAGGTGCTGTGGCTCTTTGAAATGACACGATTGCAGGATCTTGTGTGGACGGCTGGAAATTCTTCCACTGAGGACTGTTCAACTTCTTTACAGCTGACATAGTTGTTTTGTTTCCTTGGGAGTTTTCCTAGTCCTCAGAAGTGCAGT…
>EduN_3417
AGATTGAGGGATTTAAGAAGGATTCTTTGAAACACACAGAACCAACAGTTAAAAATGTATTACCTGATCAAGACACATTGGATGCAGAGAAAAAAGAACAAGAGTTGAAAGATGGAGTGACCAATTTTAACCGCAACAGTCTGAAAAAGACAACAACAGAGGAAAAGAATGCATTACCATCATCTCGAGATATTGCAGAAGAGAAAGCAGCAAAGTGATGTGTTCATCTGTACAGAATTCAAACAATTATTGAATGTAAATAAACCACAGGACGCTTGGTTCATAACATAAAACTACACTCTGTAAGCTTCGCTGGATTGGCTAAGTTTTGTCGCTAGAGTTAATTGCCAGTGTATTCACATATAAAGGATTTTCCTACATCAGTGATTAGTTTTAAAA…
>EduN_3515
GAAGAACTTTAGCAGAAGTTGGCACATCCATAAAAGCTTTAGAATGGAGATATGGCTCAGATCAAATCAGAGGGCCATCTCCTGAACCCCTGGTAGACTATATGGATGCACAATATTATGGTCCAATCACAATAGGAACACCACCACAGACATTTAATGTTGTATTTGATACCGGATCATCTAACTTGTGGGTACCATCAAAGAAATGTCATGTCACCGATATCGCTTGTCTATTGCAACCAAAAATATGACAGCACAAAGTCAAGTACTTATGTCAAGAATGGAACTGCCTTTTCTATTAGATATGGAACAGGAAGTTTGACTGGTTTCCTTAGCACTGATTCAGTAACAATTGGGAGCATCACTGTGAAAGGTCAGTACTTTTGCTGAAGCAGTTAC…
>EduN_3553
GCTGATATTATCATTCACTTTCGTTGTTACCCTCCAAGATGAAAGCAAGTCAATAATATTTGCAAGAGTTGACGGTGCCCATCGTCGCCTCTGCACGAAAAACTCCTGAAAGGTTTGTGGTGCGAATGTGAAGGCGTCAGCACTAGCAGCGTAATCTATTTTCCAACCCTGCTGTAGCATCAATGTACATAACCATCTATCTTCCCCTTGTTCAAACTGGATGAAATGGCGTGCTTCGGTAGGAGGACTTGTATACATTCTCATCACGTTATCGTCCATTACAGCAGAAGCACGAAATAAACTAAAGGCTCCTGGACAACAAAGTACACATCCAAACACATGTTCTGTAGCCTTTTGTAGCCAATGTCCGACAGCATATTCAAATTGTTGATACCATAC…
>EduN_3557
GCCGAGATAATTGGTTAGGTTGTGGTGATCGCACAGTCTGTGGTAATGAATTAGGTGATCGCACTGATTGCATGAAGTTGGGTGATGCCACATTTTGTTGAGATGAAAGCTGAGGATTATTTCCTCCAGCCATATGTTGTCTTAATTGATGCTGTTGCATCATTTGTGCATTCTGCTATTTGCGGTTAGAAATTGTTGAATGTTGCTATCTGTATATTGGAGGATTGTAAGGCATTCTAGGTCGTTGCTGTTGAAACTGTTGTTGTTGCTGGAAATTGTTGATTCATTGGCATACCCGGATGCTGTTGTATTTTGTTGTTGTTGTTGTTGC
>EduN_3576
GGGTCACCTTCAGCCACCAATGTTTACTGGATGAAACAACAAACTAATGGCGGATCATTCTCCAACGTGGACATAGCCGGAAACAACAGATACAGTGGTGGTACCTTAAGCAGTCCAACATTGGTAATCAACTCTGCTCAATTCAGCGACGAAGGAAACTACAGGTGTCATGGCGTCAATGCTGCAGGAGATGCTAACAGCATCGTGACAAATCTTGATGTCACTGGCAATGTACCAACTGTTACCCTGACTACAACTCTGTTCCCAGTACTAGTAGGAAATGACATTACGATTGGTTGTAATGTCATATCCAATCCAGGTGCAACTAATGTATACTGGAGATTTGAGAACAGTGGCAGTCAAATTACCACTATCAGCCCAAACTCAAACACAGCTAAA…
>EduN_3598
TCCACTGGTTTTCTCTGCCAGGAAACCGATTTAACATTAGGATTTCCAATTAAATCACACTGTAGTGTAATACTTCTTCCATAGCCCACTGTGAATTCCAAAGCTGCCATTTTTAACGCTTGTACACGAACCGATACGGTTTCTCCCCTGAGCTCTTCATTCTCACCAAGCGTTGCAGTACAAAAATAGGAACCAGTATCATTCTCCTTTGCATTTATTATAACAAGTGACGGGTTACTGTTATTCGATCCCTCATATTTTAAGCCGTCAATATGAATATCTTCCATTGAGTTGTCTTGTTTTGTTCTCTGCCAATACACTGATTTTGTATTAGGATTTCCAATTAGATCACACTGTAGGGTAATATTACGACCATAGCTCACTGTATACTCCAAAGAT…
>EduN_3599
AAAACAGTTACATTCAAAACGATCAAATATCCATTTATTATGATCAGGTACAACTTCACTTTTTAAGAAAGTTTAAGAAAAAACTGATAAAGTCCAGGAATTTTTATTATTTTACATCATATCTCCACCTATTGGCCCTTGAGGGCCTGGCTCGCCAACAATTCCAAGTTCTCCTTTCTGTCCTCGTGGTCCTTGTTGACCTGGAAGTCCAGGGTCGCCTTTATTCCCGATAAAACCCCAAATCCAGGCAATCCGGGAACGCCACGTTTTCCTTGTTTTCCTATTGGTCCAGGCATTCCCTTTTCTCCTTTGCCTCCCTGGTCACCTGGCGATCCAAACAGTCCATCATTACCTCGAAGTCCTGAACCTCCTTTCTGTCCTTTCACAGCTGTTCGTCCT…
>EduN_3615
GTTCTCGCTTCTTGCAAGACCGACAGCATGCAGTCTTGTAGAATGGATAATCACAGAGTTCAATTTTTGCTTGTGGTACTAATTTACAGTTTGAAAGTTTATCTATACATGTTGGATCTTCATCGAGTTGGGGAAGGTCACATGAATCAGTATTACACACGTGACGTGCAGTCGGACGATGATCTTCAGAACATGTTGAACTCGGACTTAAATCTTCGTCTAAACACTTCACCAATCTTGATTTTGTTCCAGCATCACAAGATTTTGAACACTTTGACCAAGAAGTCATAAACCATTCCGCTTGACAAGGCGGCAAATCTTTGCATGGTTTAGTTATTGTTTGGTTTTTGTTTGATAAACAGTTTTCATCTCCTACCACGGTGATTAGTTTTTCTCCTT…
>EduN_3642
ATTTTTCTCATTTGAAAAGGGGGAAATAAAAAAAGTAAAAAGTTTACCCCATACATACTGACAATAAGGGCTTATTTTAGATGTATTATATGAACAGTTCAAGAATTAAAATAATAGCTAAAATCAGACATAATCAGCATGTTTCTGAAATTGACACAGCATTTCAATGTATTTTGCGTATACACATGTGACGGTTTACTGGCGGTGAATAAAAATGTTATCAGTACAATTATGATATTTTGTTATTGCTGCAAGTGACTGTAATGACGTGTAGCCGTCATCTTCAACATCAAAAATATAACTAGGGTCGTTCAAAACACCAGCAAGGTTTTCAACGTTACAATCCTCGCCTGCTACTACACCAAAGGTATGGATGCCTTGTTGTTTTAACAATTTAAC…
>EduN_3692
GTTCGATGCAAATCTGAAGAAGATTGCATCGAATATGAAAATGTCAAGAAAAGGAATAAAAAGTCAAGAGTTTTCACTGCAAGATTACGACAATAGTGTTGAGTACAATGTTGCCAACAATGTTTGTGAGAAAATACCAATTGCAACAGGTTTCCCTTGGTGTGTGCCAGATTCTGCTATAGTATTGTTTCAATCTTTTGTTGGGACGGGAGCCAACAAAATTGCAACAACAACATACGAAATTTCAAATACTATGGAACTTGGAGATGGAGTATTGACTGTGACTGACGGGGAATGTATTCCAATCAACTTCAAACTTGCTGCTATTAACGGTGGAGCATCTACCGATGTTTATGGGTTCGAAGAGGGAATTCCAGACGCCACACTCTTTGATACGCC…
>EduN_3699
GCAAAATACATGCTCACAGTTTTAAAGTTGTGTGGGAACCTCCTAAAGATAATGGTGGCTCAGAAATTACAAAATATATCGTAGAATTGGACGATGGAAAAGGTTATGAAATGTTGTACGAAGGTAGTGAGCGAGAACATATCTGTGATCATCTTATTCCGGGACATACATACCATGTAACGAGTAGCGTGTTGTAGTGCTGGGTGGACGCAGTGAGTTTTCAGATCAATGTATAGCAACAACACAGGCTGTACCGCCAGGACAATGTCAAGCTCCAAAGTTACAAGGCAAACCTAAAGCTACGTCTCTACATCTACGATGGAGTTGCCCAGAATATGAAGGTGGGGCCTCCATAACAGAATTTGCTGCCCAGTTGATCTCACCTGATAACACTAGTCG…
>EduN_3716
AATTCGTTCAAAACACCGTATTATTGTCTTATGAAATGAAAGTAAATAAAGTTGGAATCAGTTCACAATTGAAAAAGAATAGGCTGTCAAATTGTCTTTGTGTGAATTTAATGAAGCATAAAACCGGTGAATGTGCTCATTGTATGGATATAGAATGGAGGAACACCATCGGCGCCATGTTTCACTACCTCGACATGATCTCCCTTCTGTAGATGGACAATTTCACTATTTGATGCGCAACCCAATTCTAGATGCTCTGCGTCTGCGTGAATAATCATTTCATCGTGGTCGTTGACGTGAAGAGCCATTTCCAAAATGGAGTCCCTCTTGGTGCATATTGTGACACTGAAATAAAAGAAGCCTTCTTCTGGTGCTACAAATTTTCCAGTATCAACATGG…
>EduN_3723
TGATGCGATGAAAGTCTGGTGTAACATGGAGGCTGGAGGCCAGACTTGTGTTCATCCTCTGAAAAAATCAGCAGGGGAACCTCTTAAAGCTTGGCCAAGAAAGAAGGATGGCAATCCATTCTTTAGTGAAATGAAAGGAGGTTCAACGATTGAATATCCTGATGAAGTCCAATTGGCTTTCCTCCGTTTAAGTAGTCTGGAAGCATCACAGAAGTTTACTTACTATTGTAAGAAATCAATAGCATGGTTTGACTCAGAAATGTCTAATTATGACCAAGCCATCACACTTGAAGGTTACAATAAAGAAAAGATAGACACAACTGATGTCAGCAATGTCAACGATGGATGTGCTGATCGTTCTGGAGAGGGCAAGACTATATTTGATGTCTATGCCTCTGA…
>EduN_3752
ACAAACTGGAATATCTTGACTCTGACTGTGACGTACTAACAGGAATCCAGAGGGTGGAGTGTTGCCTGGCAACCCTGAACGTCCAGGTTCTCCCTCTAATCCACGAGCACCTGGAAGTCCATCCTGACCAGGAGTACCAGGGAACCCACGCTGTCCTATTTCACCTTTCATACCAGGTAAACCATCCAATCCATGAGCTCCTTTCACGCCAGCAAATCCAGGTGGTCCTCTGAGTCCAATTTCTCCTTTCTGTCCATCTAGACCAGGGAATCCTCTCAATCCGGGTATTCCGGGTTCTCCTTTAGGACCTGGAGGTAATAGTGCGTTATTTATAACACCTGGTAGACCTCTGTCTCCCTTATCTCCAGGTAAGCCACTCAATCCATTTTCTCCAGGAAG…
>EduN_3777
CCCCCATCTATAACTTGTGGAACTCCTCAACCATCAGATAGTGTTTACCGCCGAACCATTGGCTACGAGTGCTGTTGTACACGTGGATGATCCTTCATATTCTGACCCGGATGGCGACAGTGTGAGCATAAATGGTGGAGTTCCTCCATCTGGGTTTTCCTTTGAACATGGTTACCATATAATATCTTATACTGCTACTGACAGTCGTGGTAACATGGCAGTCTGTAGTTTTGGGTTTCGAGTAACGGTGAATTACTGTCGCCAAAGTCTGTACGTAAAAAATGGATTTGCTGTATGCGATCCTGAAGATAAGATTTATGGAAGTGTATGTAAAATTCAATGTAATGATGGCTATCAACTTACATCTGACAGCGTACCAACAAAAACATGTGAAGGCAC…
>EduN_3785
GCTTCACAAAAGCCTGTGTCGAGCAGTGGTAAGGAAGGATAGCTCCATTTCGCATTCGTTTTTTAATACCTTTATTTTTGTGGATATAGTGTAACTTAGGACAGATATTCAAAATGTCGTCTTTATATCGTGATCTCGACTCAGACGTTTCCAGCAGCACAAGGATCGTCAGACACTCATACAATGTTTACAGAGGCAGCTCCCCAAGCAGCCAAAATAGACTGGAGTCCAGAATCCGGGAACTCGAAGATTCCTTAGATTCCGAGAGGGAGATGAGATTAAGGTATAGAAAAACAAAGCGCGGAGCTGACCTTCCAGTTAGATCAAATGGCTGACAGACTCGAGGATGCCAGTGGGAACATCAAACAACTGTAAGTGAAAGTAAGCAGGAAGCGTGAA
>EduN_3802
AAAATATATATAAAAACAATGCAATAAATACAGATCTTGTTTTTTTTACCTCAGAAAAATTAGTGTATAATTTTTAAAAACTAATTGTAAAGCTGAATGGAATTCATTAAAGATTCATGTCTATTGAAATAAATGCAGCAGTAAAATGTTTGCATGCATCCCATTGGTCAAATGTGTAGTACCTAATCTGCATAGAACACAACCACTATAATATGTAATGTCAAAGTTTGTCGATCCATTTTATCTTCCAGTTGTTAATATTTTACTAAATTCATCATAATTTACTTGTCCATCACCAGTTATATCAGCCTCTCTAATCATTTCATCCACCTCTTCGTCTGTTAGTCGTTCTCCCAAATTTGTCAATACATGTCTGAGTTCTGAAGCACTGACATAACC…
>EduN_3806
CTCCCTTCTCCTAGTAATAAATTTGATGCTGGAACTCTAACATCTTTAAATAACACTTCTGCATGTCCAGCTGGCTGGTCAAGGTAACCAAATACAGTTAGAGGTCGTACAATAGTTACCCCTGGTGTATCCATGGGAACCAATATCATACTTTGTTGTTTATGTTTAGGAGCTTCTGGGTTGGTCTTTCCCATAAATATACATAGTTTACAGTCTGGATGCATGGCACCTGACGTCCACCATTTTCTACCATTGATAACATACTGGTTACCATCCCTGACAATTGATGACTGGATATTTGTAGCATCGGAGGAAGCAACATTTAGGTTCAGTCATTACCAAAAACATGACCTCACTTTCCCCATTCAGTAATGGAGTTAGCCATTGTCTCTTCTGTTC…
>EduN_3839
TTGATTTCTAGTTGGCCAACTTTGTGCATTACTTGTTGATTCCAGTCAGAACATATATATGCATGTTTGTTCATTTCCAGTAGGACATATATATGAAATTTTGTTGATGTCCAGTCAGACATATCTGAATTATTGTTGATTTCAACTTGGATGTACATAAGAACATTAATAAAATGATGATGTCAGTGATATATAATGGTATGTCCCTTGATGAAGATGACCTTGAGGAAGAGAACAAACAGAATAACAATGTAACAGGGATACCAACAGTTTCACAAACAGTCGATCGAGGCCAGGGTGGCCTCAGTAGACAAAAGTCAAGAAATAGTAGGAAGAGTTTGCACAACTCACGAACAAGCTCTAGAGACCTTCAGTGTGGGAATGATAGACAAACTAATG…
>EduN_3856
GGCCTCATCTTCCCAAAGTTGTGGTGTGTGTGACCTCCGACACATCAACAAACCATCAATAATCTGGTGTACGGAATGTGATGAAGGGCTTTGTCAAGATTGTCAGGAACACCATAATTTATCCAAGGGAACCAGAAACCATAACACCATAACAATAAAGGAATATAAAACATTACCAAGTGAAGTACTAAAAATACACTCAATACTGTAGCACACACAATGACAAATTTATAATGTATTGCCGGAAACACGAACGTCCCTGCTGCAGAAACTGTATAGTGGAAACTCATAAAGAATGCCCGGATATCGATAAATTAGAAGACGTCATTAAAAATGTAAAAACCTCAAATGCCTTCCACGATATTGAAGAAACATTGGTTGAAGTAGCAAGAAAATTTA…
>EduN_3865
GTACATGTATGTGTTGATGACTGAACCTATGTATGTGTTGATGATTGGAATTATTCCGTGTCTTTTGATTGTTTGTTCCTATTTTCACTCCATGCCTTTGCTATAGTTTTCTTCATCTCGTCATCTCCGTCTTCATACATCTGTTTCATCATGGTCATCAAACTGTCATTAGGATCAGCTATTTTCATCCACTTTTCGGTTTTTGGCTTCCTTTTCTTTATGTTCTCGCTGGGTGACATGTGACCTAGGTTTTGGTATTGTCCTTTCTCATCATTACCAGGACAGTGTCTTGTTTTAATCTTAGTAAAAAACTTTCACGTGGGTTGTATATCATACTAAAAAGTTTAGGAAATATAAAGTTCATGATTTTTACCATCCAAGTCGTTCACTGTTAATCTG…
>EduN_3871
GTTTAATCGAACACATGCTGGTCTTTAGCAATTTCCTTCATGGACATTTTCTCTCCACACATGATTTGCCGCCTTCTTCAAATTCCTGCTTTGAAATCCACATTTGTTGGAAAGAACCAAGAGAAGCTAGAATAGATCCTCCAATCCAACTACTGAATCTCCTTTCCGCACTACCAGTCGTTCCTGATATTATTTTCAATCGCATGCTAGGAGGTGTCTTAGTACTTAAATCTCTGTTTAACCTATCAGTAAATCCCTGTAACAATGTGTTCCCTCCAGTCACTATAACACTACTGTATAAACTAGGTCGAATGTCAATATCACACATGCCTACACTAGTGGTCACTACATGGCCAACACTTAACATGGAATTCCCACTAGGTAAATCCTTTATCACAG…
>EduN_3884
GTTTAGTTTTGCCTGTCAAGTCGTCTTTTAAGTGCCTTCTCCAAAAAAGACAATATATCTTCCTGATCTAAATTTTCCTTTCTACTTGCTAAGTTATTTCTCCTATCGTTTTTTCTTTCATCAAGATGTTCAATTTCGTTTTTCAATTCCTTTTCTTCGTTTTGATTCTTAAAGGATTTCCTTTTAGGTCCAAATATACTGTTTATTCTGTCCGGGTCAATAAGTGGCTGTACAGGCCTTACTGATGAGTTCACCGTGCAGACTTTGGAGGCCACAGAGTTCTGAATACTTTCTAATGCGCTATAATCTTCCACCATGAAGGAATGTATTTCTACTGGATCCGAAGACATGGCTTTCAGTTCATCTTCATCCAGATAGTTACCTACACCTATTGAAAAC…
>EduN_3912
TTTAATTCTTTCTTTTTTGGTTTTTGCAATTCATACAAAAAGGAAATAACTCAAATAATGTAGTGTTTTTTTGGTAAGTGAACATGTTCCATTTTTGTATCCATAGATCTCAATTTTACTCTCCTGTTTTTATTTATACACCATCTACTTTGAAATCATCATTGTGACAAATTCTTCATAATTAACCTGACCATCCCCGTCGATATCGGCTTCACGTATCATCTCGTCTACTTCCTCGTCAGTTAGCTTTTCTCCGAGATTTGTCATCACGTGACGTAATTCAGCAGCACTTATAAATCCATTACCGTCTTTATCAAAAACTCTAAAAGCTTCTCGAAGTTCTTCTTCAGATTCGCCGCCATCTTTGATTTTCTTTGCCATCATTAGTTTAAAAAATTC…
>EduN_3941
GGAAATGGTTAATCTTAACAACTTAGACATTTCTGGAAATGCTTTAAAATTCGTACCAAAAGAAATACAAAAACTATCTTTTCACAAAGTCAAAGTTCGTGGAAATCCCTTACAATGCGAATGCAATATGACATGGATGGCAGATTGGATCGCCTTGTCAAATAGAGGCTGATGAGTCTTCTATCACGTGTTCCTCTGATGATAAGACACACGTCATCAAAGATGTGACAGAAAAGGGTACTGGGTTGCAACATATCGGATTTTGTCATCATATTCAGCGTGATTATGACTGTTGTTGTTGGAGTTATCATAGGTGGTATTATAACGGCAAGACGATGTCCATATGAAACCAAAGTGTTGATTTATCGTCTCTTAAGAATACACCCACGTGATCTCTAC…
>EduN_3950
GTTCTCCTGGGTGTCCAATATCTCCCTTTAATCCACCATCTCCTGGAGGTCCCACTGGTCCTGAATTTCCAGTCATACCCTGTGGTCCATTTGCTCCATGCATAGACTATCATATGCTGTGATAACATTTGTCGGAAGGCCTCAGCTTGTGGAGCCCTCTTTTGGTCCCAATTCATAGGAATGACAAAAACATGGCCTGGGGCTCCTGGTAGACCAGCGGATCCCGGTACTCCATCCCTGCCAGAATATCCTGAATCTCC
>EduN_3959
GAAATTCTTTATTAAAGGCACTTTCTACACCTGTTGCTTTAATGTCTACTGCTCGTTTGATCAAGTCTGTTGTTTGGGCTGACAAGTCTCTGATCACTCTGTCCCAGTTGTTGAAACAATCTCCACAAGGCTTACAGTTGGGGAGTACTCCTGTGGTGCCTCTATCACAGCGATCACATTTGTAACCACTGATTCCTGTCAGACATACACATTGCCCTGACCTCCTGTCACACTGAGTCTGAGCAGAGCCTTGGTAGTCACAGTCACATGGATAACACTGCACAGTAGGATCTCCCCAGTAATTATCTTCACAAGAGGCACAGTCTCTTCCTCCTCTTCCCTGTACACAATCACATTGACCATCAAACTGATTGCATTCTACTCTAGTAGATCCAGGCA…
>EduN_3970
ATTTCCTTTTCGTGAATATTGTAGAGGAGAAATAGTATGTTCCAGCTATTGGAGCGGTAAAAATACCAGTTACGATGTTGTAACAGTTTCCATTGTTAGTAATCGCCTTATCAAATACAACCGTATGCCAAGGACTAATATCTGCAATCGATGTTCCAAGTTTCGCAGAGAACGATATTTCAACTGAGCTTGCTAGCTGTCTCCTAGTGTTTCTTAAATCTTCCGATTTATCGTTGTGTTCTTTGACTGCATCGAGTCCTAATTTGCCTTCCAACTTCAGTCTTAAAGATGGAACACATGATTTTGATATGTTTGGTATGTGTTGCTATGGCGACCGCATCCGGACATTTCAAATATTAATAAAATGGAAAAGACAAGGAAAAGGTAGAGGTTCGAGAA…
>EduN_3988
ACATAGAAACACACTGACTAGTACTGTTCCAAGGGAGACAACTCTTACAGTACAGTCAGCTTATAAAGAATGATGAGTCTACAGGAACAATCTTGATACAAGAAAACCATGTGGTTATAATATGTAAATTTGCATTAAAAGGTTCTTGTGGATGTTTGATAAAGATACAAAAAAAAAACCAAGTCCCCTCCTGCCTTTACAATCCATAAAAACTTATTAAAACAAAACCATCAAATTTCTAAGAATAATACAAGTTGACAAAACTACAGAATCTAATACATATAAAATTGAAAAGTGTTTTGACAGATTATATTTATACATGTGTTTTTCCCCACAAAAATCAACAGTAAAGAAATGCTGCCAAAACTTGTTAAATGACAAATGTTGCTGTAGAATGAA…
>EduN_3992
CAAGAATGAATCCAGCTCTGACGAAACTGAGATTACCAGTCATCACGTGATTAGATCTCAAGTCTGTGATGACAAAGGATCTTCCTACAAGTGTACTAATAGCATGGTGGTGGGTGGAAAAGAGGAAACGATTGTCGAGGTAAAGGAATGTTGTCCTGGATTTACAAGGAAGACAAATCAAATTGGTTGCCCCACTGCTGTAGAAACAAAGAATCTGCTGGAAAAAGCAAAAGACTTGGATCTCACCAAGTTTATAGAAGCCATTAAAATAGCTGGATTAGAACAAGATTTAAAGAATGGGAATATCACACTATTTGCACCTGTTGACAAGTCCTTTGATCAGATGTCTGATCTCTTGGCACCTAAATCACAGATAACACTACAGGATACTGGTGTTTT…
>EduN_4004
CCGTGGTCCAGACTGGAATTATGGCGACAAAGATGGAGGAGAAGGTCACGTGGGATCAATCATTGCTGTCAGTCAAGATAATACATGTGACGTAGTATGGGACAATGGTCGTGAAATGAAGTGTAACATCGGCAAAGAAGGAAAACGTGATCTGAGAGTCGTCGACAATGCACCAGCAGGTGTGAAGCACTTAGGTGTACAATGTGACGAATGTAAACAGAGGACTGTGATAGGAACACGTTGGAAGTGTTCTGTATGTGACGACTACGATTTGTGTACTATTTGTTACTATGGTGACAAACACAATCTGAGTCATCAGTTTTTGAGAATTAACAAACAGTCGAGTAAACCAATAAAGACTTCCTAAAACGAAGCCACGTCACAGAGAATGAGAGCCTT…
>EduN_4006
CTCGCTCTGGGCTTTATCTAGTTCTAATGTATCTCCTTTCTCAACATGAACGCTAAAAATGTCTTTGCATTTAACTTGATTGCCAATTGTTTCTTTTTGTCTTCCCTGTGTTTTCCTCTGACAAATTTTGTCATTGTTGCTAATCCATAGGTATATTTTGCCTTACGGGCAGAAATTGCTTTAGGAAGATGTCCGAATATGACAGCCCCTTTCAGTACTGAAAGTCCTGCTTCTGCTGGGATTATCACATTCATATTTGGAAAAGCTTCTTTCACCTTTGCCTGAATCATGTGAGATTCTGAAAATCCACCAACCATGATAATGTTAGTAGTTCCCTTAACTTCAGGTTCTTTTAAAAGTTTTTTCACATGTTCAATTATATTTCCTGTTGCAATTTCA…
>EduN_4013
ATTTTCCTAACACTCCTTGACCTTCAGGACTATCCTTTGTTAGTACTTTTGGTGCAAAAATTTCTTTTATTGCAGCAAAAACTTCCTTAGGTGGTTTAGAGGCATCAACGGCAGTGTGGATACCTTTTTTAGCGTAATAATCAACTAATGGTTTTGTTTGGTTATGGTATGCCTCTAATCTTTTCTTGAGTGCTTCTTCATTATCGTCAGAGCGTCTTATTAGTGGTTCACCTGTCATATCATCCTTCATTGGGAACTTTGGTGGGTTGAATTCTACATGGTAAGACCTGCCACTCTTCATATGAAACAGACGTCCTGTAATTCTCCTGACCAGCAGTGAATCGTCTATAGCAAACTCCACACAGGCATCTAACTTGGTCTGCCTCTTTACCAATAAGT…
>EduN_4022
GCCAACCCAGCACACACTGCTGTTTACTGGACACGACAGAACAACAATGGCAACACAGAAACGCTAAATCCTGCTTCCTCTACAAAATATTCTGGATCAACTATACAGTCACCGTCACTGACTATCAACAATGTAGACACCTCTGATGAAGGCAATTATACATGTCATGCAACTAATGCTGGTTGGTACAGGTCAAAGTTCACAGACATTCTTTCATGTTATCGGAAATATCCCATCTGTAACAGCGTCAATCGTCTCCTCTGTGAAGGTGGGAAATTCTGTGACAATAACCTGTACAGTAACAGCAACACCAGCAGCTACCCAGATAGTCTGGCAGAGACTTGTAAATAGTGTGACTACAAATATGGATTTAAGTAGTAACCGATACAGCGGAGGAAC…
>EduN_4030
GCTTGCTCCTGGTCCATCAAATCTGATTGAGTTGACTTGCCCTGCTGGACTTATAACAGCCAAAGTGTTTACTTGGTGTTTAGCAATTCGATGGCGAAATTCACAGAAATGTTTTCCATTAACGGCTACCTTGTAGTGATGATGCTGACATAAAATTATTATTTCGAAAGGGTAATTTTTCTGAAATGGCATGCCACCAGTTCTCTCCTCCGAACCCCATGATCCATTCTGTAGAGAGTTTCTTACTGCACAATTTTCATTAAATCTTATGTTGAAATGTAAAGCTGTGTCTGATTGAGGATTAAGACTAGAGCCACTCATTAAATTTATTGTAAATGCATTTTCATGAAATGGTACGGTTCCTTGTATAATGATCTGTCGGCCATCTATCATACCACC…
>EduN_4053
GTAAACCAATATCACAAGCACAAGTGTACCCTCCAAGTTTGTCAGTGCAGCTTCCATTCACACAGGGATTTCTTTGACACTCATCATAGTCATCACATTTGGAAGGGATGTTAATGTAGCCATTTATAAGATTGCTATAAGCAAACTCATTCCAGTTGACGAATCCAGAGAGGCACACATTCACTTTCACATTTCGAATACAAATGTTCATTACTCATATACCCTTGCTGGGAAACTATGCTAAACTGGGAAATGGCTCCTATGAAGTCATCTCCTCCTAAAGTAATATTCAAGTCAACATTTTGAGAAAAATCTATGTTGTTTGTATATATTTTATGCATATCTCCATCCACAAATAAGGAACTCTCATTTCTTCCAATATGTAATGCAATATGATAC…
>EduN_4077
TTGCAGTCCAATTTTTCATTGGACCATAATTATAATGACCTTTTTCAGTGGAATAGTTCTGGTGAATCTGAAGCTCAGCAATTTCAAATCCCAGACCAATAAGATCTGAACTATCATCTGGCCATTTTGTTCTTCTAAATATTTCATTTACTTTGTTCAATGTACCTATAATATAATTTGCTGTGGTATGAGCTCTTCCGTCACCAACTATTTTTATGGAATTCGAAGTCTGCAAACTAAAAACNGCTTGCAAACTTCTTTTTGTTCCAAATGATTTTATGTTTTCTCTTTTAACTCTACTTTGACCTGTTTGTGTCTGAGTATTAAGTGCTGCCATCTGGAGGAAATATTCACTAGCTCTGTTTTGACTTTTA
>EduN_4091
TAATCCTGATCCGGTTCCTCATCACTTGAATAATCAGGCAAATGCTCTTCCGGTGCACTTTGTCTCTCGTGGCCATTTACTCTTGAATCGTATGATATAGTCGATAAACTAATAGTTTCTTGGTAGTCAACTTCTTGATCAGCAGACTGCAAATTTTCTGTTTCCTTAAGGGCTTGTTTAGCCCATCCTTCTTCTGTTTCTTTTGAAAAAGTCCAGAGTTTTACACTTGATATTAGATAGTAAAAAGGTGCCCCACCTGTGGATAAGCATTCCAATAAACTGCAATAAAATAACCAATGCAAACACCACTAAGAATGTGACCGACAAAGGTTCGTATTCGTTTAATATAGTAAAAACTTTTCAACTGATCCTCGTTGTTCTGAAGTTGGAATACTGCAG…
>EduN_4102
ACACGCACTTGGTCTAGGCCATTCTTCTAATTCTAAAGCTTTGATGGCACCATATTATCAAGGATATGATCCTGACTACAAATTACTGTATGACGACATCTATAGAATGACATCGCTCTATGGTGGAAGAGCTGCCACGAGACCTACTTCTCGTCCACGAGTGACAACGAGAAGACCAAGAGTTACAACAAGACGACCAAGGGCTACAACAAAACGACCCTCTACGAAACCAAGTATCTGTGATCTGAAATTCGACTCCTTATTTATGAATGGTGATGATCGTCGAATTTACGCCTTCCGATATAGAAAAATCTATCGATTTGAGAGTGATAAAAATGGCATAGAAAAGAGCTTTACCAAAGTTTCACGGAAAGTATTAACCCCAAGAGTACCTATCAA…
>EduN_4103
AAAAACTTTACATGGAAATAGTACTGATGACAGGTATAGCGGAAGTTCACTTTTAGTCCCATCTTTGACTATTACCTATGCAGAATTTTCAGATGAGGGGCAATATACATGCGTAGCTGTCAATGATATAGGTTCTGGTTCAAGTGCTGCAGTCTTTGTAGATATTGTTGACAAAAATTAGAGTATTTACCTTTGATATTTAGTACCAGTTCTACTCTGCAACACACAGCAGGTGATATTGTAAAACTAGAATGTCCTGTTACTGAGAAAAGCTATGCAACAATTGTTTATTGGCAGTTTATTAAGACTGGGCAGTTAAAGATCTTGCAGCCCTTTAGCTTCACAGACAGGTACAGTGGAAGCACAGCAAACTCGCCATCTTTGACAATCCGCGAGGCA…
>EduN_4163
TCAATCTTAGAATTAAATAACTGTACGACGAACCATATAGGATCTTGACAACATACAAACACACGATACGAATCAATGTCACTGTATTCAAATGCTGGTTCTGCTATGGTATATAGCCAAAAACCAGTAACATTTCCATATACATCAGTTGTTGTTTTTCGAGCTCAAAGTTGAACGTATTAGGTAAAGTGAACGGCATGGTACAGCATATGTCATCCTTGGTAGCATCTGTAACATTGATTTGGAATAAAGGAAGTGCCGTTTTGGTCGTCTCAAGTATTTCAATGATGTGAGGAAGGTTGTTAATAATAGGTGGCTCGTTATACGAGTTAACAGTTAGGGTGACAGTAGATGTATGCTGACATGTATCAGTG
>EduN_4165
GCGTTCTCTCCGGGGACCGAAATATCTTATACTTGATGCTGGAGGTGGCACTGTTGATATCACTGTACAGGAAGTACAAACTGATGGAACCATCAAACAACTGTACATGGCCAATGGCGGTGACTGGGGAGGAACGAAAGTGGACCAGGCGTTTGAAGAATATTTGATGGAGCTTGCTGGACCAGAGACGGTATACAAGTTCCGTGATGAAGATAAAGACTGGCCACCTAGACTTGTGTAGAGAAATTAGAAATACAAGAAGACGTCAAATTAAACCAAGACCAAACATCAAAAGTTAACATTTAAAGTGCCGATTACTTTAAGTGAAATATTTGAGAGAGAAAAGGGAACTGATTTCCGAGAATCGTTGGCGTCGTCAAAGAAAGTACGATGGGTTGG…
>EduN_4166
GGAGCTTGCTGGACCAGAGACGGTATACAAGTTCCGTGATGAAGATAAAGACTGGTCACCTAGACTTGTGTAGAGAAATTGAAATTAAGAAGACGTCAATTAAACCAGACCAAACATCAAAAGTAACATTTAAAGTGCCGATTACTTTAAGTGAAATATTTGAGAGGGAAAAGGGGAACGTGATTTCCGAGAATCGTTGGCGTCGTCAAAGAAAGTACGATGGTTGGGGATAAACTACGGGTTGATCCAGATGTGGCCAGAGGTTTCTTTGATAACGCCTGTCAACATATAATCCAACATTTAAAGGGTATATTCGACGAGGCGAAAGTTAGAGGCACCAACACAATCCTAATGGTTGGTGGATTCTCAGAGTCTCCAA
>EduN_4175
CAAGACCCAAGTTTAATGTCTGTGACTGTTGCACCATTATTATTAGAATGGAAATTAGATTGTTCTCTGGTAAACAACTGCAGCAATCAAGGACAATGTGTCAGTCCAAACAGATGCAGGTGTTTTCCAGGTTGGAAAGGAAATAACTGCACTGAATATGACTGTTCCGATGTGAATAATTGTTATGGTAATGGACGATGTGTTGGACCAAACAAATGTGATTGTCATTCAGGCTGGGAAGGTGAAACATGTATTATAGCTTCTTGTATCGATGTTAAGAATTGTAGTGAGCATGGTGTATGTCTGAGGCCAGGAGTGTGCAAATGTGCATCAAAGTTTACTGGTGAAGACTGTAGTCAGTGTGTTCCATTACACTGGGGACATCTCTGTACCCAATGT…
>EduN_4177
GCAGAATCGTGGCCAAAAGGAAAATATACTTTAGTGAAACCAAAATCCGGCTGTCCATCCGGATGGGTACGAAGGATGGCGATTTCAGGACTAATGAAGATTATAGCAACCATAACTGGATTACCAGTGGTCATCATTTTTACGGTTCCTTTGACACTGGAAACACTAAAGCGTATTACTGTACAAAGATTCGTGATGAAAAAGTTAACAGATTGGACAAAATGGAAGTTAGTGTTATGGCCCAAAGGAACTTACTGTATACTAAGGAAAGGAGGATCGTGTCCTTTAGGATTTGCAAACGGATATGTTCATTGGGATGATGAAGACTCTGGTAATAGAAATGATCTTGGAGGAACCTTGCCAGATGGAAAGTATGATGATGGAAACACAGAGATACAG…
>EduN_4236
GTGAAATGAAGGACGAAGATGATTTTATGTATGTTATGTCATCACATCTCCTGGTCGCGTCACCAAACATGAAATGGTCAAAATGCAGTAAAAAAGAAATTACAAAATTTGTAGATCGTGGATGGGGATATTGTTTGAATGATGACCCAGGAAATTTAGGAGAGGAGTCGTTTAACTATCCAGTATTACCCCCTGGGACCATGTATGATGCTGATCACCAGTGTAGATTAATGTATGGACCAGGTGCAGCTTTATGTGAAGGCAGGAAACGGGAGGATATATGTAATACTTCGTTTGGTGTAG
>EduN_4238
AAAGAGGTTGATGAAAAGTGGGAAGAGATCAAACATTATATATATGACGATGATGAGCAGGACGAAGACATACCACAACCAAAACAAACAAGACTCAGTACAGACTCTTACAAGTCTGTGGTAACATCCAATGATGAATCGGACATGGAAAGTGATCGTGAATCTCATGACTCAGATTCTGATTATGATGACCATGATGAACAACAGTCAAGTATTCATGGTCATAATAAACATAGAAACCGACAGCTCGCAGAGAAAGTCTCGACAGTATTTCTGGCAATATAATTTACAATCAAAAGGACCTAAAGGTGCCCGTGTTAGTTTTGAACAATTAGAACAAGATGATCCACATGTTGTAAAGGATTTTGAAGATCCAGTATTTGATCCTGTGGCAAGTAA…
>EduN_4250
GTCGAGTTTGGGTCCACGATTGAGTAGTTTTGTGATTGATACAGAAAATAATGTGTTAGATGTGACTGACGCTGTGAAACTTTTACCTCTACGCCATAACCAAATTCTCAATATATGTGGTTATCCATTACATGGGATGGACTCTGAACTGTTAATCCACCTGCCACCAGATGTTGTCATTAGTGAATATGGTATACAGGCTGATTATGATTTCCAGAGTATTTTGCTCACCATTGTCCAGTCATGGGATTAGTTATATAATGTGTCCAGGAACTTCAGCATGGAACAGTTTAGCAGGTTGTCCTGAAGCAGCTATAAATAACTATTTTTAGCGCTAGTAAAATGGT
>EduN_4285
AGGATGAATATGGAACTGCAGCCTATAAAACCGTAGAATTAGATACCTTACTAGATGGTGTACCCATTCAACACCGAGAAGTTCAAAGTAATGAATCATCCATGTTTAAAGGCTACTTTCCATCAATAACTCTGATGGAAGGTGGAGCAGAAACTGGATTCAGAAGCGCACAAAAACAAGCAGAAATCAAACGGCTACTTCATTTCCGTGGTGATAAAAAAGGAGTTGTAGTTAAAGAGATTTTGCGGAAAAGAAGCAAATTGGATTCCAATGATGTGTATATATTGGACCTTGGCTTGCAAATATATCAGTGGAATGGTGAGAATTGTAACAAAGATGAAAAATTCAAGGCAATGCAATATCTCCAAGATCTGAAAAGCAAACGTAGTGGAAAGGCTT…
>EduN_4395
GATCACAGGTACTGTTTACCTCACATTCGTTTATATCTACACAATTTCGCTGATTTATTTCAACTTTGAATCCTTTAGGACAAACACATTCATAACTACCAACATTGTTCACACATTGGTGGCTACACTCGCCGTTATTTATTTCACATTCATCCACATCTAGACACGTTCGTCCATCTTGATGAAGTTTATATCCTTTTGGACACGAACACGTCGGACCTTTTTGTGAGTCAGTACATTTTCTATCACAACCACCATTGTTTACTTCACATGTAGCGACACAAGTTCTTTGATCACTCATCAGTAAATATTTAGGAGCACATATGCATGCCCGTACCCTCTGGTGTATCAGTGCAGTTTATGTTGACCAACCACCATTACCAGCAGAACATGTACGTA…
>EduN_4410
CAAGGAACTGCTGTTTATGGAGCTACTAAGTTTGCTGATTTGACAGAGAAAGAATTCAAGAAATATGTTGGAAAGAAATGGAACTTGATAAAGAATACCAACAAAGACATGAAACAAGCTTTCATCAGACCAAGATCAATCCCAGAATCCTTTGATTGGAGAGATCACAATGCAGTCTCTGATGTGAAGAATCAGGGAAGCTGTGGATCATGTTGGGCTTTCTCCACAACAGGCAACATAGAGGGACAGTGGGCAATACAGAAGAAACAACTGGTATCTTTATCAGAACAGGAGTTGGTAAGCTGTGAATAAAGTAGACCAAGGATGTGAAGGAGGACTACCATCCAATGCATACAAAGGAAATTGAAAGACTAGGTGGACTGGAAGACAAGAATCAAC…
>EduN_4423
AAAGAGCAGCCTATGTAACCAGAGAAATATCTGTTGAGGATAAGAAGACGAAGGAGAAACGAAATATTATCCAGTACCATTTCACAGCCTGGCCTGATCATGGAACTCCTGATCCTCTGTACCTTGTGCTTTTTCATAAGCATGTCATATCAGATCACTCTGATGTCGAAAGTGGAAAGCTTCTCGTTCACTGCAGTGCTGGCATTGGAAGAACAGGGACATATATTGGATTAGATGCTCTTTATGAGGAGGGACGTGTCACAGGTTGTGTCGACATTGTCAAGTTTGTAAAGAAAATGAGATACAGTCGAATGAATATGGTGCAGACTCCAGACCAGTATGTGTGTTTATACTATGCCTTGTTGGAAGCTTTTACCATGACAGATACAAAGATCGGAA…
>EduN_4424
CTCACATTATCATACACCTATACAATTATGTTTATTTTGTACAAAAAACAAATTCGAGTTTATAAATTACATTTTCATTTAGATTGTTTTAGTATAATAAGTACTAATGAATTCCAAGCGCAAATTGTTTTTGCATGGTAGATTTCCCACAAATATTACAAAACTGTCATAGAACTTCATTTTCCGTATTGAAGTCCATTTACTTATTGCAGCTGTACATCTGTACATAAATTTACCTCTTTTGTGCCATTATAGCAACAAATTCTTCATAGTTAACCTGACCATCTCCATCAATGTCTGCTTCTAAAACCATTTCTTCAATCTCGTCTTCTGTTAAATTCTCACCAAGACTAAGCATTACTTGTTTTAATTCGGACTGACTAATTTGTCCATTTCCAT…
>EduN_4481
GATATGTAAAGTAGACAGTGGTAGTTTCGGAGACTTGGTTATAGACAAGGCAGCAATAACACATTCAATTGCCATTCAACCATCAACACCGGCACCGTCGACAACACAACCAATCCCAGCTTCAACAGAGAAGGCAACAGACAAGTCAGAACTCCCATTACCACCATGGGGTAGTTGTCTGTTATTGTATGTGGAGCACTGGTATTAATTTTCCTTCTTGACAATGATAGCCATTCTGTGCACACGAAGACAGACGAGAATGATGAAATATCGAATGTCTGATGATATGGATCCGGATGACATCGGATATCGCCGTAGCTGGGGAAACGGAGAAACTAACCATGCATACGATAATAAACAAGAGGCCATGGCAGTTAATGAAGAAATGAAACATCCGGT…
>EduN_4488
TGACAACATCGCATTAACATTGTTTACAGATTATCCTCAGATAATAATACACCTTCCAACAAAAGTAACGAATAAGATCAAATGGATCTGGAAAGTTTAGATGATCTGCAGAAACAACTATTGACGTGTCCTGTATGTCTGGACGATTTTCATGACGACACACACACAAAGGTATTACCTTGCCTCCATTTGTTATGTGAGACTTGCATCCCAAAAGTAGCTAAAGACGGAGTCCTTCCCTGTCCAACCTGCAGAATGGAACATTCAATTGCCTCTTTTCCAACAGACAATACAACCAGAGATCTTTCTGATTATGTAGTAGTGAAGACATCACCTACAGTTTCTTGTGAAGGAAGAGGATGTAATGAAACAAATGTTGCATCCCATAGATGTCGTCCC…
>EduN_4489
CGAGGAGATGCCTTTGACAGAGAGAGATCTCGCAGACGACGCACAGTGGAAATTAATTCAAAAGAATACCTTCACAAGATGGGCAAACGAACATTTAAAAACAGTAAATAAAACAATAGCAGATCTTGAAAATGACTTTTCAGATGGATTAAGATTAGTTGCATTAATTGAAGTTTTATCCGGCAAAAAATTTAAGCATGTCAACAGACGTCCCAACTTCAGAACCCAAAAACTTGAAAATGTCACCAGGGTTTTTGGAGTTCCTCGAGAGAGATGAAGGGATAAGAATTGTGAATATAGATTCTTCAGACATAGTAGATAGTAATTTGAAGCTCATCCGTTGGGTTGATATCGGACCCTTATTTTACATTACTCAATCTCCATGCCCATGTGGGAAGG…
>EduN_4515
GTTTAGTTATGCATACTGTTTTTCTATAAATATATATCAAGTGTCAATGCAAAGTTTTTCTGAACAACATATATTGCAATATTAGCAATATAAATTATGCGACCATCACAAATTAATTTATTAACAGTTTCCCCATTGGAATTTCATGGAAGTCGCAATAGAAACTGAGAAATAAATTTTCATCACTTCTGGTAAAAACCTTTTCTTTTCCAGACTTATATAGTAGTTGTGTTACCTCGCCGATATCTTAACCATACATTTTAGGTTCTTCCTCAGTCAGGTTAACCACCCCGGAACATTGTCTATACTGGTTTGAATTTGGTCCGTACGAGTCGTACGACTGACAATATGGCCAACAAATCCGACGATGTGAGTCGTAAGTAGATATGTAAGAAATGC…
>EduN_4521
GTGATGATTCAGTAACTGCTGAATCTACTGAAGGTCCTTGTACTGGTGCTCTATCAAACAGGTTGAAATGGGCTGAAGCTTCATGTAACATCATTAACGAAGATCTGTTTAAAGTAATGTAGACAAGCAATCGTTGGTGGTGAATCAAAGGTGGAAGAGTACTACAAAAACTGTTTATACGATTCATGCAAATGTGATAGCGGTGGTGACTGCGAATGTTTGTGTACTGCTGTTGCTATGTTTGCTGAAAAGTGTAACGAAGTCGGTAAACCAGTCAAATGGAGGAATCCAAGATTTTGTCCAATCATGTGTCCATATGGATATGAATATAAAGCATGCGGTAAACCATGTCCACAAACATGCAGAAATATTGGAGATGAACCTGATCAATGGTGTGAA…
>EduN_4522
CATGGCCAACCTTTCGGAGGAAACTATTGCAGAATTTAAAGAAGCTTTTGGTTTGTTTGACAAAGACAATAATGGCCAGATTACGAGTTCGGAACTTGGAACAGTAATGAGATCTTTAGGGCAAAATCCAACGAATGCTGACATTACAGAAATGATAAACGAAGTAGATAGTGACGGTAGTGGAACAATTAATTTTGCCGAGTTTACAAAAATGATGGGGAAAAAGATGGAAAACAGTGATCCAGTTGAAGATCTCCGAGAAGCATTACAAAATTTTTGACAAAAACAGTGATGGCAAAATAG
>EduN_4571
GTCCTTTAACAATAGAGCGCGTGTTGATCGGAACATGTTGAAAATCATGAAGCAAAATTTGGAGGATCTTACCAGCCCAAATCTATGGCGCGCTGTAGCCGCCGAAATGGTCGGGACTATATTCCTGGTCTTTTTGGGATGTGGTGCCCATACATTGCAGAATGGGCAACCAACTGCCGTTGGAAACGGGTCTGTTGTAACAACCGCAGAACCGAGTGTTGTTCAAATTTCTCTGACATTTGGACTTGTCGTAGGGACAATGATATGGTGCATTGCTCACATAAGTGGTGGACATATTAACCCTGCAGTAACAGTGGCAGCTCTTATTACCCGTAGAGTTAGTGTAGTTCGTGCCTTCTTTTACATTGTTGCCCAAATTGTAGGTGCAATAATTGGAGC…
>EduN_4594
CGAAAATTCTGGAAAAGAAAGCGGTACCAGCATCTTTTTCCTTATTTTAATCTGTTACCTCAGACACTGCATTACTCTTAACAAAATGCCAGAAGAGAATTCTAAAGACGAGTTCCCAAAGATTGATGTTTCGCTTGAGCAGGATGAAGGCATTTTGAAGCAAATTTTACATGAAGGAGAGGGTGAAGAGAAACCACTAAACGGTGATACAGTGTCAGTTCATTATGTTGGTTGTTTAGATGACGGAACAGTAGTTTGATTCAAGTCGGTCAAGAGGAGAACGATTTACATTTGAAC
>EduN_4610
AGGATCTTACAGATGTTACTGTGCTGATGGCTATGCATTAGAACCTGATAAACGAACATGCAAAATTCTGAACAATGAAAATCGGCCATTTTTGATAGTTGCCAACAGAAACCAGATTTTAAACATGTCATTCAGTGGCAGTTATCAGAAAATAATTGTAAGCGACACAGAGAATGCCGTAGCTGTTGATTATGTATTTTAGAAGACAAAACAATTTACTGGACAGATATTACCAGTAAGAACAGCTGGATACGAAGACTGGACTTGAGCAGTGATGATAATGAGATTGAAACATTGCATGATGACAAGACATGTGAAGAATCCTGATGGTCTGGCAGTAGACGTGGGTAA
>EduN_4630
ATATTACCATCAGTTGAAGTACAATTTACGGTTCGTGTCTTTAAACCTTCACCACAGTTCGTAGAACACTCGCTCCATTGATCTGAGGACCATTTGAAGCAATCTTCAACTTTGCAATGTCTAAATGTTTTGGGTGCATCTAGATGTGAACATTCGTCCAATGTACTTTCGAGGAACAGAGAATCTGCGACTTCTTTTAAACAGGAAATGTTTCTTATTTGCATTCCATCATCACATGTTGTGCTACAAGAGGTCCATGGGGATGCTTCCCAGCTTGCAGGACAGCCCTGGGTGTTACAATCTCTTGGGTTTTCGTCAGGTCTTGGTAATCTTCTACAATGAGTTTCAAGAACTTCTTTTGAAGCACGCACGCACTTTACGATAGGATGTTGAATCCCT…
>EduN_4656
AAATTTCCTTGCTGGTGCTGTTTTGCGTTGTCAGTTTATTTGACCAGGGGTTAACTAATCCAGTTGATGACCACCAAAACGATGACCACCACGATGCTCCGATAGTTGGCCACCATGACGCTTTCCTTAAGGCCGAATTCGATTTAACATCACTGAATGCTGACCTTGAAAAGTTCATCCACCACGAAATCGAAAAGGAAATTCACGATGTTGAAAACCATACAGAGCATAACAAGCATGAGATTGACGCACTCCATCTAGAAATTAAACAACTGCACGAGGAGGTCGAATATTTCAAATCTCACCACGTGGCATTTTCTGCTGAACTGACCCATCCTATTGAAAACATGGTCGCTGAAGAGATTGCTCATTTTGATAAAGTCAGAGTAAACTCTGGAG…
>EduN_4657
AAATAATATCGTTATACAACAGGATAATAACAGACTTTCACCGGAAGATATAGAACGTATGATATATGATGCTGAGAAATTTGCTGAAGAAGATAAAGCGACAAAGGAGAATTTAGATGCTAAAAATGAATTAGAAAGTTTGACATATAACTTGAAAAATCAAGTTAGTGATAAACGAAAAACTTGGAGGAAAATTGACTGACGAAGAAAAATTAACAATAGAAACAGCAGTTGAAAGAAAAATTAAAATGGTTAGGAAAATAATTTAAATTCTTCAGTCCATGATTTGAAA
>EduN_4658
GTTTTCATATTTTACCATTGTTTATAGATTTCAGGTGACCATATCTAAATCAAGGCAGTATTTATGTCCTTTCAATTGTGTGACAAACACGATTGACAGCAGACTGCCCTGTATCCTTCATGCTTACACATTCCTGCTTGAATAACTAAAGGACAGTTTGGATGTATCTTCACATCTTTCCGAAGGATCTGTATAACTATTACAAGGGTTAGTCCCACACTCCTCTGAGCTGCTTGGTTTCATGGTAATATCACAGGCATTCACTTCACGGTTATCTGTGTCAATACACAACACGTCACGTGATCTCTCTCCTTTACCACATGTCACAGAACACTGACTCCATTCAGTCATGAACCACTCTGGCGGACATGATGAGGTATTTAACATTTCATGCTCGAC…
>EduN_4676
TACATTCTCACAACAATATTTAAACAAACACCTCAATGATGATAAATCATATGGTCCAATAAAACCACATAGCAGTTAGTATTATGTATCATACACACAAAAAATAGACCGTGGATTCCTTATGTTAGCATTAAAATCAAATCACGTCACTAAACATAGGGTAGCCAAATTTTGCCATTTTTGGTAAGTTATGTAAATGGGGGGAAAAATGTAGAAAAATAGAAAAATAGCACTGTGAGTGTGAGGTTAAACAAAAACAAGGTCATAAATCATTTATCGTCTCTCAAATGCCAAGAAAAAGGACTATTCTCACTTTCGTGTATCATGTCACTTTATCCAGATTTATACATAATATTCGTTGTTAAGTACACATAGGTTTGGGACATTTGATTAAATTTG…
>EduN_4714
GCCGAGGCAATGAACACAGGAAAATCAGTAAAAGTACAAGCAACCAAAGCATCAGAAATATCAGGAGGACCGTTAACTGGGACATACAGATTAGAACAGTTTCATTTTCACTGGGGAGCAGACGACAACAAAGGTTCTGAACACACAATCAATGGCAAGATGTACGCTGCAGAGCTACATTTAGTACATTACAATACCAAATATGCTAATTTTGGAGAGGCCGTAGACAAACCAGATGGCCTTGCAGTGTTCGGTATTTTTTATCAAGCCTGGGGCAAAGCATGTCGGTATGAAAGAATTGACAGATAACACATTATGTAGTATAACAGCAGAGGGGAAAACATGCAATATGCCTTGTGATTTAGACATGGCCAGTTCTTCTACAACTCTGATCTGAAC…
>EduN_4804
CGGAGATTTAATAAAATCGCATTTTGATACTGCGTGTTCACACATTGTAAAAGAAATACGCAAAGTCCTAAAAAAAATACCTACTACAAATTTAAAAACTTTTCTTCTTGTTGGTGGGTTTTCAGAATGTTTAATTGTACAAGATGCAATTCAGCAAGCATTCCCTGACGTACGTATTTTGATTCCACGAGAAGATCCCGGACTAGCGGTTGCCAAAGGTGCAGTTCTTTTTGGTCATAAGCCAGATTTTATAACATCACGTATTACAAGATGCACTTATGGTAGACGGATACGTCCATTATTTGACGAGTCGAAGCATGATCCGAGTAAACGTGTGTATGGAGAAACTGGGGACCGATGCAGAGATGTATTTGAAACGTTTATGCAAAAGAACAAAAG…
>EduN_4849
CAATCACGAACCTCATCCTGGGGTGTACCAAACGTTTGATGAGCAGCATCAGCCCCATTCAGTGTCATTGTCAGACCTGCTTGTGGATGCCAGGTAATTTCAATATCTTGCCACTCGTTTTGTCTGATACCAGGAGTGGATACTGTCCAAGCTTTAGTGGGAGTTCTGGCAGTGGCAAGCAACTTCCCGTCTCTGTAGTAAATCGACAAAGGGAAGCTATCCAGGAAGTACATATTGTTCAGTAAGGTTTTCCGGTTTCATTGCCATTCGCAGTGTGAACTCCCTGTGGACAGTTGTCAAGGTTACCAGTACATATGACATCACTCCCCTA
>EduN_4868
CGGAACATGTTTTCTGGTGGCGATTGGCAAGAGGAGGAGCGTGACCAACCATGCTTTCCATTTGAAAAGAAGGAAACATGTGAAATTGCCATCAATATAAAGTCCGATAAATTTGTGACGTATGTAAATGGAGAACATTATATAGACTATAACCACAGACTCTCATTAGATAGTGTGTGTCACCTGAAACTGACAGGACATGCAGAATTTTATGAACCAGAGTTCTTGTAAAAGTAACTTGGCATTATAAACACCATACGAGAATATCATCGCCATATACTGCAAAGACAATCAGCTTATACATTATAAATCTGTGATATATAGAAACAAACTAAGTGAATAATAGAATCAGTACCTGTCTGTTTAAACAAAAGTATAGAAGGAAGAAGTATTTGCTAA…
>EduN_4885
AATTTCGACGTGTCTATAGTGGACGCTTTCCTGGGAACGCCACTAAGTTTGCAGATAAGATGTTTGACTGCTTTGATACGGACGGCAGTGGAACTGTGGATTTTACTGAATTTGTGATAGGAATATGTATGATGGACAGTGATAAAGTCGAAGATAAAATCAATATTGCATTTTCATTATTCGATTCGGATAAAAGTGGATCTATAGACCGAGTTGAAGTCAGAGATCTTCTACGGGCTTACAACGACCTGTTTGGGTCCTCTGCGAACGAAATAAATCCACAAACAGTAGCAAATCAGTTGTTCGACGCCATGGATAGAAATAATGACGATGTAATTTCAAAAGAAGAGTTTACATCAGCTGTGCATAAAATAACCAGAACTTCTTAATCTCATTCGA…
>EduN_4922
GAACTCGGTGTCGTAATGAGATCATTGGGTCGAAAACCCGAACGTGACCAGGAACTAACAGATCTAGTCAATGAGGTAGATATTGATGGCAATGGAATTATAGATTTTCTAAGAGTTTTTGACGATGATGGCCAAGAAAATAGAAGGATACCGACACAGAAGAAGAGATTCGGGAAGCTTTCAGAGTTTTCGATAAAGATGGAAGTGGATCAATATCAGCAAATGACCTTCGACATATTATGACTAACCTTGGCGACAAACTCCCGGATGAGGAAGTGGATGAGATGATACAAGAAGCTGACTTGGACGGTGATGGTCAAATTGATTACATTGAGTTCGTGAAGATGATGTGTGGAAAATAGCGATCCAAGGAGAGTTCAAACATATCTTAGATATTAT…
>EduN_4933
CATAATTACAGAACGTTTTAGAAAAAAGAGTGTTTAATTATGCCCACACGTTAAAGTCAATATGAGGATTTCTTCTTTCATCACTGCAGTCGTTTCTGTTTGTCTGTTGTCTTAAAGCACTTCTTTGAATTTCTGTTAAGTTGTCTATATTTTTGCAAAAGACACTTGCAAGGGTCACTTTTCTGATTTCCTGAAGCTTGTCTTGACTGAATCCCTCTGGTTCGGCTCTTTCATACCAGAATCGGTCACCTTGTTTTAGATTCTGAAATTGTTGACCAAGTATGCAACCAAATGTCTCTCCAACATAAGCGGCATCGCCAGATAAGCGCTGTTCCAACATGCCTCCCACATACAAATCAATATCATATACGCTTGCATATAAGTCTCTCAAATCCCGTG…
>EduN_4958
GCATCAGCAGATAGATCGTACCAAAGAGACCCTGAAGAAAAAGTAAATAAGCAAGTCTCCCAGAAATAGTCAAAGTCTTGAGGAACAAGATTTAAAGTTGAAAAAAACTAAAAACTAACATTGATCATTCAGTGTTATACACTGATAAAGTTATGAGTCATTCAAATATTCCTGCCTTTCTCCAGCTTAATAAAACCATTTCAGACAGACTGCAGAATTTAACAGTTGAACAGTTTGACAAGGAACCATGGGAAATGGCTGCATTTGGCTTAGATTGCAGTGGGGTCAGTACTGATATACAAACCACATTAGACCAAAAGATGCATATCTGGTCAAGCTCTATTCTTTCCTCCAAATACTTCTATTCAACAGCGGAGAGCAGCCA
>EduN_4966
GTCGACTAGTGAACGATAGCCCTAAATGCAGTTGTAATGAGTACTTCACAGGATCAAAGTGTGAAACTTGCCTCTGTCTGAATAATGGGATCTGTAAATCTGATCAGAACAAGTTCTACTGCTCTTGCCCAGGTAATTACAGTGGTAAACTTTGCAATGCATCTGCCTGTGGTGATTATTGTTTCAATGATGGCCAATGTACAAAGTGTTCCAAAGATAGTTCCACAGGGAGATACAAATGTTCAGGTTGCAGTTGTACAAATGGTATTTGGGAGGGGAGCGATGTAGAAACACATGCTTCGTGGACACAGTCAAGCACAGTCGAGTGATATAGAAACAGATG
>EduN_5019
CACAAGTTAAGCAACACTTTCTCTTAAAACTTTTGTATCTGCACAGATTCATTAATTTGGCCATACTACAATACGTCGAGTAATCGGTACATTTCGGTTTACATTTTGGCATTTGACAGGGCTTTCGTGTGTTAGGTTGAGGTAGATGATTGCAAAACTGCCCAGCTGGCAACCCAGAATTCGTCCATATACAGGTTATCATACGGACAACAGAACCTTTCTTCTCGCATTCGCCCATACACTCGGACCACGAAGAAACATTCCACCGTGTTGTACAATTCTCATTTACACATTCTTGTTTCACGACTGGATTCTTTGACAGTTCTTTGCATAAACTATCGTTAACATGAGATCCGTCCATTGGATTAGTACAGTGTTATTTTACGGGTCTGTACAGAG…
>EduN_5040
GTGAGACTTCTGAAGATTTGTTTGGCAACCATGATAGCTCTACAGAAACTTTCTTTACCAGACTGGTCTATGGTGTCTTTACCAGAGTAGTGCCAGTAAAAGTCCATGATGGACTCCTGCAGTCTCAGTAAATAGTCCACAGTACAGATTACAACATTCACTGTGGTGTTGTTACCTGCCTGGGTTCTCAGGTAATTCTGGAACTCTGCGTTGTGACCTTCACATAGCAACTGAAGGAATCTGAATAGTTTACATGTGGTCTCAGCATCATACAGATTTGTCTCCCCTGCATTGGCATCAGAACTCATTCCTAATCCTTCTGCCTTGTTAGTTCTCTCAAATGCATCCAGATCCAATACACTGCATGCTTGCATAAGTCCTGACAAAG
>EduN_5080
AAAGTACTAACAGGTGTAAGCTTCACAATTACAAAATATGTCTAAGTCAGTGATATTTCTATATTACTATTGTGCTAAGCTGTTAAAATTCGATGAAAACATATGTGATAACAAAGTTTGCATTTAAATTATTGATCAACTATGAAATTCATGCAACATGATGCAACCTATTTAAAAGAATGATAAATGAAATGTTCATAAACTCACGATACTAATCACATCTAAATAACCGACATGTCAAGTCTGGAAAATCAAAATTGTGTAAAAGTCACGAAAATACTGTCGCAATTTATTTTTACAAAATTTAAAATCAAAATGAGGGAAATCGTACATTTACAAGCCGGACAATGCGGAAACCAAATTGGTGCCAAGTTTTGGGAAGTTATCTCAGACGAGCAC…
>EduN_5092
GATTTATTGTCTTTCCGTGACTAGTTCGTTACGGAAAGACAATAAATCACAAGTGCAGTCAAAAGGATTGTTTGCTATATTTAATTTTTGTAAACTTGACAGTGAACTTAATACATTGGTTTGGAACGTGGTGAACTTGTTATGGCTAATATCTACTACTTCTAAACATCCTAATGTTTTGAAAACATCTATAACAACACTTAAATTATTCCAGCTTAAATCCAAATTTTTCAAGCACTTAACATCTTGAAAAATGTTATCTGGTAGTGTTGATAACTGTGTATGGCTAAGGTTTATAGTTATCAAATCACGATTATCATGAAAAGCATTTGAATGAATACTGTTTAAATTATTCCCCTGTAGGTATAATTCCTCCAGGTTCGTCAAAAATGATAAATC…
>EduN_5108
GGCATTCTTTTCACATCAGCATCAAGACATGGCGACTTTCAGTTGGAACAGATCTCTCCTTTTCTTCAGTTTCATAGCTCTTTCACTGGCTGGTAATTTGACAGTAACAAAGAAAGTGTTCTTCGATGTTTCAATAGATGGCAAACCACAAGGAAGAATAGTGATGGGATTATTTGGAAATACAGTTCCAAAGACAGTAAGAAAACTTCGTTGCCTTGACAACACATAGTAAAGGTTACGGATACAAAGGCAGCAAAATTCATCGTGTCATTGAAGTATTTTATCCAGGGACTAATCAACGCGAGCTTTATGACTTCGCGCTTTACTGGGAATTCCTCGTTCAATGGGGAAGAACTTACAAGTCCCCAATACCCCTAGCACGAAGGAGGTTCAACGGGT…
>EduN_5120
CGGAATTGATTTAGGAACAACATACTCTTGTGTTGGTGTTTTCCAGCATGGAAAAGTAAGACATCATAGCCAACGACCAGGGGAACAGAACAACTACCAAGTTATGTGGCTTTCACGGATACTGAAAGACTGGTTGGTGATGCAGCTAAAAAATCAAGTCGCATTGAACGCTACAAATACAATATTCGATGCTAAGAGACTGATCGGCAGACATTTTTAGTGATTCGACAGTTCAGTCAGACATAAAACATTGGCCATTCAAAGTTATCAACAGCGGAGGCAAGCCTAAACTACAAGCTGAACACAAAGGAGAAACAAAAACATTTACACCAGAAGAAATAAGTTCAGTGGTATTGGTTAAAATGAAAGAAACTGCCGAGGCTTATCTCGGACAGAAAG…
>EduN_5122
GGCACTGTAGTAGTTGGCTCTGTTGTAGTTGGTACTGTAGTAGTTGGTACTGTAGTAGTTGGTACTGTAGTAGTTGGTACTGTAGTAGTTGGTACTGTAGTAGTTGGTGTAGTAGTAGTTGGTACTGTAGTAGTGTGTAAATCAACAAAACCATGGGATGTGGTGATTCTAAATCTTCATCTGGGCAAACTCCAAGAGGAGGACAACCGCAACAACAACAACAACGAGCACCTAATAAGTTTGATAGGGCCCTTTACGGGGGACGAGCTGCTGCTAAATGGAAAAGAGCTGTAGCGGAGAAAAATGCGTCCGTCAAAGGTAGCCAAAACTCTACATCTGAGAAAGACGCTAGAAACAGAAATGCTAAGAAAGGGAAAAGAAACCAGGCTGTAAAGGAAC…
>EduN_5137
CAAGAACACAATGAAGAACAGTAAGACTATCCCCGCCTTGTTGGTACAGTTAAGACCATGGACACAGTATGCAGTGTTTGTCCAGACATACATGACATCTAGTACTCAGTATGGGGCCATGAGTAAGCTTATCTACTTCAGAACTGCTGCCAGTATGCCAACTGTCCCTGCTAATCTGAAAGCCAGAGCTGTTCAACCAGGAGAGTTGCATGTTACATGGGATCCACCTAACCAACCAAATGGAAATGTTACTCATTACGAAGTTTACTGGAGACGTAGAGAGTTGGACCCAAGATCATATGCTCCAAGAGATTACTGTCATAATCCACTGGCGACTTACAGTAGAGAGGAAGAAGATAGAGAGAAAGAAGAAGAAGAAAAGGAAAACAATGCAGAATT…
>EduN_5138
ATTTTGTTTAATTTTTTCTTTTCTTTTGATTTGTCTTTTTCCAGCGTTTCAGGATCAGGGATTAGAATTGCTTTTGTCGGTGGTAAAGTCGGTGAGGGTGTAGGCTTTGGTGTATTTATTATAAACTGATCTCTGGAATATTTCGGCGGCCATACGACATTTAGGGAGAAAGTTACATTTCCCGCCGGGTTGCTAGCAACACATTTGTACACCAAATCCTCGGTTGCTTGTGGATCGGATAAGTACAGAATTCCGTAATTGTCATTAGAATCTGACTTAGCTTTTGGTTTGAACGTTTCTACTTCGTTTCCAGGTTTAAGCCACTGAATTGTTGGAACTGGATCTCCGGTAGCTACACAATTCAGTTTCCCTACCTGCTCCTCAAATATGGCATCTTAC…
>EduN_5141
ATTTTGTCCAGATTACTTACATTTATTAGTACATTAAACAGTATTTACATATAGCATCTATAATACTCCAGAAAATAAAAATTGAGTTCGTGCATTGAACAAAATCATCCATTCCTATAATCAATCTCAGTGCATGTTCTTCTGGTGTTAAATGTGCCTGTTGGACAAGGATGACTAGGCAGATTGAGATTACTACATTGCGTCGGAGCAATTGCAGCAATTAGTTCCCTATAAAACCTTTCCTGATTGTTGTTGTTGTAATCGCTGCACCTATGTGGATTTCCTGTAAACGTACAATCATTTG
>EduN_5142
GTAAACGTACAATCATTTGCGACTGGTGTAGGAACATTCGCTTTCTTCTTCTTATTGTTTGTCTTTTTCAAATCTTTCTTGCATGTTATTCGGAATGGTCTCGGACCACCCCCGGATGAACCTCCTTCATTTCCATTGCATTTACAATTTGTTTCCGAAAATTGCACATGAATTCTTGTGTCTCTTTTGACTCTCCAGTTGACTCGTTCTCTTTGTCTGTCGGATGCATTGCAGTATGTCACAATGCAAAGTAATGCCAGAAAAATTACTATCTTCCATTCTTTTAAATATTTCTCTATGGTGCAGGACAATTGGAACCGTTAATGTTATTCTCTATGAACTTACTTTCACTTCATG
>EduN_5153
AGATTACCAGGAAATAAAAGTACAATAAATAAACTATATGCAATAGGAGAAGATAAAATAGTTAAATAATTTCAAGAAAACAGTAAAGAACACAACAGAATATGTCTTTTAACTTCTTATATTTAGTGTTAATCTTTGCCAACAACAGCCTGCAGCAATTTTCTGTAGTCGCCAGAGCAGTCATCCTGCAACCATTTCCATAAAGTCTGCTTGTTATTTTCCAAGAAATGCTTTTTGATCTGAACCATATCAATCTCACTTCTGGATGTAATAATTCTAATCAGACGATTGTCCTTGGTTCCTAGACCTTTCATTGAAGATGTTAATTCATCTGCAAAGAACCTTGGACGACACTTAATATTTTTCACAATAGATAGAAGTCCTCTTTCAAAGTCCCCA…
>EduN_5169
GGTCGATTCATTAATCTGGCAATACACAAGATGGTTAACATGTTGAGTGTACTCCTAGGTTTGCTTGTTTTCACAACAACTCCAACAAAGACATCAACATGTTGTTTACCAACACAAATGGAAGGGTATATTAGGTTTCTCAAGCGGATACCAAGTCAAAGGATAAGGGTTTCCGAACAGAGGCCATGTTTCTACTTGCATATGATAGTAAAAGGGAAAAGACAGTCCACTCTAGGGGAGGGAGTAACTAATGGAATCAAATTTCAAACTCATCAAATCGATGATTATGCGGCGGGCAAGCAGTACACCGTGACAAATGGAAAGTGCGTTATTGTACCTTTAAAAACTGAAATGCTTTATTGTATTCCATCTGATGCATGGCTGCTGAAGTCGACCTTT…
>EduN_5204
TAAGGTCCCAGATTTAAGTCAAACGAAAGATATTCATCAAACTGAATATAACCATGAAAGGATACACAAACGGGCGGTGCCTTCTACTGATTTCACAATCGAATTAGCCGTGTATGTTGATGCTGATTACTTGACATATAAATTACCAGCTTCAAACATGACACGCAGAGTGGAAAATATGGTTTGCAAATATAATGCAGTACAGTTTGAATGGAGTCGTGCTGATGTGTTAAATTATAACATAACTCTATCAATAAAACTTTTGACGTTTTTTGACACAAACCCGTACCCTGGTACAATGCTTCTACTGCTCTATCAGTTCCTCTGAACACTATATGTACTGGAACTGAAGCTGGTCTAGCTTATGATCATGTACATGTTCACACAGGCATACCTAAT…
>EduN_5208
GATTATTGCTGTGCAGTCCAAGAGCAGACGATCCTTTGAAATTTGAAACGAAAGTTTTCATTGGTTGCTTCAACACAGATGATCCTGTTAACTGTCCAAGCGCTGGGGTTGTCTCTAATCTTTGGTTTGCATCAGGTATTTTATTGTCTGACGCAAGGCTTGTTATAAGACCTGTTGGCAGAATGCCGTTGTCTATTTCTTTGCACCACTTGTAAAACAATGCAAGTTCATCCCTCAACTTAAAGATTGCCTTTTCCTTACTGGTAACCAAGTCCTCCAAATACTGGTATCATAACTTCTTTCTCGCTCTACATTCCCTTGCACTCTGCCTACTGCGTTCTAACTTGACCCTTTACATCCGACCTTGGCAGTTCGTCTGGCCGGGGTACGTTTTGTTGG…
>EduN_5223
CTGTAGACAATATACTTACATGTATGTAAGAATACATTATTATGTGACATTTAATGCAATCAGAATTGAGAATTTTAGTTTTGTATGTATGCATAAAGTGAAAATAATTGTGTGCCAATTTAAGTGCAATTCAATACGAATCTTTATGGAAGATAGTTTTTGTGTGCAGTGAACTATGATTGCAACAAAATGGACTTCCTTACTATTGGTTAAAAATAATGAACAGATTGTGAACCGATTGGTGAAAATTACATAAATAGAACTGTGATGCTATTAACATTAACCATTTACAAATAACAGATAACATACTGGATTTCATATCATGTGACAGTCATGTGACTGTCATGTGATGAGTGATGCTACGAAAATGTTTTGTGAACTACATATAGCATGTGCTGC…
>EduN_5244
AATATTTCCTATAAGGTTTAAAAATAATATCATACCACACTCAATATTCTATGGCCATGAACATTCTAAATAGAAATTATTACAGTAATACAGAGACCAAGGAATGGCTTCATGTTCTTATGCGCACTTTTGTTACATGATTTTTAAANAATAAAAAAAAAGAATCATTTTGCATTGCTACTACATAAAGTATTCATTCGAATGCATTACACCTTTGAAATTCCAATGACACCACAAGCCAGACGACCCCCAGCATTGCCTGTTGTCTTGCTTAGCTCATGGCCACCTTTACCCAAGTCATCTATATCAGCATGGACTACTACTGTTCTTCCTATGATAGACTGGGGACCAGTCAGGGATAGCTTTGCATCTGTTATTTTAATTTCTGCTTTTCCATCT…
>EduN_5253
GTTTTATCATATTTGAGTCAAACCATATAACAAAATCTTTATAAAAATATTAATATTTTGGAAATGCTATTAATGCAGTAATTTTAATCAGTTTTGTTTCACTTTACACAGAACCAAACTCTTTCATCCAGTTTTGGTATTTTTCCAGATCTTGTGCTGAGACACTTTTGTTGACCTTTTTAATGGCCATTTCAAAGTCATCCATGTTGGGAGGTACTTCTAATTCTTCTTTCGGAATATTCCTGACTTGTTCTGGGGTCAAACCACTAATTCTTCTCCTAAAGGACATCATGGCTGCATCTCTACAACATATAATATGGACAGTTATATGTCTGTTTCAGAGGCTAATTTTAGTAGGGTTTTTCGAGGGGGCCTCCCGCCCCCCCCCCCCCTACTTTT…
>EduN_5321
CAGGAGCAACATCTTGGTACTGGACATTCCAACCTGTAGGTGGCAGTCAACAGACCATAGCCCAAGGAACAAATAACAATCAGTATACTGTTGATAATTCTGGCACAAACCCTCACTTGACCATAAAAAGTATTGCTTTGAATGAAGCTGGAATCTACACTTGCTATGCCACTAATGCTGCTGGTACCAGTGACAGTTCCAATAATCCTAGTTCTAGACACACTTTGACAGTCACAGGAGCAATTTTGACTGTGACTATTTCTCCTGCAACTGCTAATGTTATCAGAGGAAACACCCAAACAATAGATTGTAATCCCCAGGGAAACCCAGCCGCTACACAAATCACCTGGTATTTTACACCATCGGGTAGTAATACTCAGCAGTTGCTAAATATACTCA…
>EduN_5346
TTCGGATCAAACCCTCACCAACATTGATATGTCCAACCGAGGTATAACGGAAATCGACGAGTCATTGTTCGCAAACTGTAACCCACAAGCAATAAGTATTGATCTGTCTGGAAACCAAATAACACATATAAATGCAACTTCTTTTGCATCCTATGACGGGGGACTTAGTCAGAAGTATATTTCTTTGTTTTACCAACTGAAAACATTAAATTTAGATGATAACCAAATTAGCTCAATAGACCATGATGCTTTTAAATACACAAACGTTCTGGAGACACTGAAAATGAATACAATCAGCTCCGGTACATTAGAAGCTGAGGTCTTTGAACCTATTGGCAACACATTGGTCACCTTGGAGTTGTCACATAATGAATATCTATCCATTTGGTCGTTCGATGT…
>EduN_5354
AGTTTCAGACCAGTCAAAGAAAATGAGTATACAGTTAAGCTTACTTATGTTGGTTGTATTGTATGCATCATCTGCTGCCAGCTCTTGCCAAAGAATAAACAATGACGAATTCGAAGATTTGACGAATGTCATGAGGAAGATAACGTGTCAATCAGGAGGAATCTCCGAAAAACCGGCGTTCCTTGCAACCTTAACTCCAAGAGAAGTGGCATTAACATCAGGCAGCGTAGTTAAATTTGATTCTATTTTAACAAACATCGGGAATGGATACAACGCAAATTCCGGAGTGTTTACGGCTCCACGTAAAGGGACATACCAATTCGCAGTGTAGTTTTGTTTCTAGTCATAGAAACAACGAATGGCTTGAACTGACCCTGGCAAAAAAATAACAATCGACTT…
>EduN_5376
ATACACAAGGGAGTAAATGTCAATAAAGTTTATAGTTCTTCCACCAGCTGTCGAACTTTTGGTTTATTTGGATTATTTTCAAGCAACCAATCTGCAAGCCAGATCACAGGATCTATGGGTTTCTGTTTACATAATTCTGTCAGACCTTTCAGTAATGTTGGATTTACAGATTTAGACAAGTAATCTTTTGCAGCTTGGCCTGTCTGGACTGGTTCTATTACACTGTCTGACAAAAAAGAATCTTATTTCCCTCTCTGCCGCTAGAAAAAGTGTCACTGCCATGTAATGCTATTTTTCTGATCATCTGCTCCATATATAGCTCT
>EduN_5426
GAAATCTACTACTGGTTCTTTTATATCCAAAGAACCATAAACAGAAGAACTTGTTCGTTCAGAGTCGTTATATTTAGTAACTGCCATTTGGTAACGTGCCCAACTGGCTATAGGTTCATTTCCGTATCCTCTTGGTAATAACTGATAAGTCATGTCCTTTAATTTAAAATTCTATTAACTTTTAACATTACCATAGTTATCCTTCTATTTGTTCGTTGTACATAACTAGGTACGTTTGGGGCATAGAAAGTTAAAACGGTAAGCTGCGTCCTTTTTCTTAGTTTTTTTGACAGATGTAGTTTAAA
>EduN_5439
GATTTCCTTACTACGAATAATATACAGTGTATGACCACTTTAGATCCTAATTACAATGGTAATGCATTATACCCTGAAAGGAATAATTTACCTGGTCAGATATATAATGCTGATCAACAATGTGAACACATGGTTGGGACAGGATCTGTTATGTGCAGGCAACAATACTCTGGTGACTTTTCTTCAATATGTTCAGTGTTATGGTGCTCCTCGCTCAATAATCCTTCATCATGTCAAAGTTATACAGCTGGAGACGGAACGTTGTGTGGGAACAAAAAGTGGTGTAGAACAGGAGTGTGTACAGCATCATCAAGTGCTCCTAGTGGAAGTGACACATGCTTGTATGGTGACCAGTTTGGTCAAATATTTAGTAATGGTTGGACATGCGTAGATGTTGCT…
>EduN_5451
GTAAACGTACAATCATTTGTGACTGTGTTCCTCTTGCATACTATTCTGAATGGTCTTGGGCCTCTTCCGTGTCCACCTCCTTCGTATCCGTTGCATTGACAATTTGGTAACGAAAAATTCACTTTAATTTTCTCCCTTCTTTTGCCTCTCCAGTTTACTCGTCCTCTTTGTCTGTCAGATGCATTGCAGTATGTAACAATGCAAAATAATACTAGAAAGAGTACTATCTTCATTCTTTAAACTGATTCTCTGTGACAAATGTCAGTACCAG
>EduN_5462
ATCTGTTGCTGGAGTCTGGTAAGGCCTCTGACCCATAGGATCTGGCCACGCCTTCCTCCTACATCTTCCTCTTCCATCATAATGTCATGATCGACTTCTTCATCTTCTTCGTGTCTGCCACGTAGGCGACGGCAAACATTTTTAGGTATTGTACTTGTTGGAACAGTTGTAACAAGCTGTCCCCATATCAGATCCCCTATTCCTAAAAATATACACCAAAACCACTGCTCTAGTGTTAATCCTTTGGTGTAAAACACAGAACCTCCAACTTGTACTAGTACTATCTGAGCTATAAAGGTTCCTATCCAGATAACTATAAATACTGGATTCCTCTGTAATCCCTCCAGAATATTACGCTGCCCATGGTATTTTTCTAGCATTGACCTCATTACAAAG
>EduN_5508
ACTACAAGGAATTCTTGTACAAGTATCAGAGCAAGTCAGAAAACAGTATGACTAACAGAATTGTTACAAACCAAGCCCATATATTTCAACATGATTCACAACCATTGCCAAACAGTAATTTAAGCGTAGAGGAAATGGAAGCTAAACTTGTTGATTATTTCCATGGAGATTTCCTCAAGCTAATGAGCTATTTGAAATCATGCGATAAGTATGGTCTGGGTGTAATTACTCCTCATGAGTTTCGTGGTGCTTTGGAGAAGAGACTTGGGTACACAATGTCAGATAAACAGTGGGATCAGTTGAAAAGTGGGGTTACTTTTATTGTTGGAAGTGTACTGTGTGTATTTGTGATTTTCACGCCGAGAGTTGTTTCTTGAGGAGGTATAGCACTAATGAAGG…
>EduN_5514
GAAGGCATTAGGGTTAGAAACATCACATGTAAAGTTAAAAGATACCAGGCTGTTGATCCAAAACTATGTGAAGGAAAGAGGAAACCAAGAGTTCTTAGAACTTGTCAGAGGAAAACTTGTTCCAACTACTACTGGAAAACAGATAACTGGTCACAGTGTTCTCAGACCTGTGGTTTTGGTATGAAAACCCGAAGAGTGAAATGTGTAAGACGTGATGGCTACCATGTTCCTGACAATCGATGTGATAGAGAATAAAAAAACCAAAGTCAAGAGACGTTGTAGTGAATTTCCATGTCCTTTATTTCTGGAACACCTCACCTTGGACTTCGTGTGATAAAACGTGTGATGAAGGTGCACAACAAAGACAGGTTGTTTGTCAAGCTGTGACCAAAGAAGGAA…
>EduN_5525
CGAGCAGACAAAGTCATCACCCAACACAACAAAAGTCAACCTATGTTCTTGTACCTTCCTTTCCAGTCAGTTCATGAACCAATAGAGGTTCCTAAAATTTATGAAAATATGTACGAAGACATCAAGAATGATGGAAGACGAAAATTTTCGGGAATGGTTACAGCATTAGATGATGCCATTGGAAACGTTACAGATTCACTGAAGCGTAACGGAATGTTTGAAGATACCCTGATCATATTTACTTCAGATAATGGTGGTATGCCAAGCCATTCTGGAAATAATTACCCACTGAGAGGGAGTAAGGCAACAGTATATGAAGGAGGAACTCGGGCTTCAGCTTTCGTATACGGTTTGGGACTTCAGAAAAAGAATACTGTTTTTGACGGTATGATTCATGCT…
>EduN_5568
GGGGTTTGCTGTGACCGTACAGATCAAGGTGATTGTTTGACCGATGGTAACACTGTACTGGCTCTGACCAATGTTGACCTGAGGTATGGTTCCAACAACATCTAAGTTGACCTGTGAACTGACTGTAGTGCCAACAGCGTTTGTAGCTTGACAAGTATAGGTAGACTCGTCTGTACTCTGGGCATTATAAATGGTCAATGATGGTACACTAAGGCTACCACCAGCATACTTTGTGGGGTTGTTTGTTACATCCACAGGCGTTGAAGTGCCGCTAGAGCTCACTTTGTTCCAGCGTACCATGGTAGCAGAAGGTGTTGCAATGACTGTGCACTGAAGTGTGACAGAATTTCCTAATGTCACAGAAACACTTGTATCAACATTAACTGCTGGCCTACTTCC…
>EduN_5594
GTCATTTTAATGTTTATCGTGTCAACGGTTGCCAACATGCATCGATGGTGAAGATATACAATAGTAGGCAAGTCGAGACTTTAGCTTGAGAATCAAAACAAGACAAGTACACAGATGGCGTGGGGCACATGTAAGTTTCAATCACATTGGGGACAACGAAGCGTCTATGCATCCTCAGCATCTCCCTCCTCCTCATCGAACTCTCCCTCCTCCTCAGCGGTGGCGTCCTGGTACTGCTGGTACTCAGACACGAGGTCGTTCATGTTGCTCTCAGCCTCAGTGAACTCCATCTCGTCCATGCCCTCACCAGTGTACCAATGGAGAAAGCCTTGCGCCTGAACATAGCAGTGAACTGCTCGCTGACACGCTTGAACAGCTCC
>EduN_5646
AAGGGAGTCCATACTATGTAGATGTCTTTGATGTAGCCAGCATTCGTGTCTCCAGATTTAATCAGCGAGGTGTTGGAGAACCTGCTAGTTTTGATGTGGACCTTTCTCAAGCTAGCAGACATGATTACGAAGTCATTATAAAAAGTCCATCAGGTCGTACAGTGGACCACAGCATTACAACAGAGGACCGAGATTGGACCAAGAATATAGCTTATATTCCAGATGAATCAGGACCTTATTCAATCTATGTTAGCTATGCTGGTTATGAATTACCTGGGTGTCCCTACATACAGAATATCGATGAGT
>EduN_5674
TGCGTTTACAATGTTTTCCATATTTACCCTTTGGACAACTCTGATCACATCGTTCTCCTATCCAACCAGCTGGACAGTTGTAAAGGCATGTTCCGGTCACGTGGTCACATTTGAAGGATGTTGGACAATTACACTGCTGTTGACATTGTCTACCATAGAAACCATCTTCACACTTTTGGTCACAATTCTTACCATGCAATCCAGGTTTACATATGCTATTTTCCAATCTTATTATCACATGTCTCAGTATTTTCATGATGGCATGTACACTGTTCCCAAACAGTTCGCTCCGTACGTCCATTCTGGACATCGGATGGTTACAGTGACGGTACCGAAAAATCCAAC
>EduN_5704
GTTGAGGTAAAAGATATACAACTCTGTGGATCTGATACAGTGGTTCTTAAAGATGGTAACAATCCAGTCACACCTACTCTGAAGACCTTGACCTCTAGTAGTAAATCAGGGGAGGTCATCATGTCAACAGGAAATAGAATGTATGTCTACATGAAGTTGAAGGAACATCTGAAGTGTAGAGGTGTTCTTCTGGCTTATAGGGAAGGGTGCAATTTCCAGATAAAGAGTAATGCAGGTACCATATTTACCCCTGGATTTGGTGTGGTTAACTATCCTGGAGTCCTGCAATGTTTCTGGTCTATAACATCAGTCAAATAAAAGACAGCTGAGACTACAGTTTAATG
>EduN_5722
ATAGAAAACGGTAACGACCGTGTCCTGGAACTTTAGTATACAGCTGATGCGAATCTAATATTCCCGACGTCCAGGGTTTTATTCATGCTTGTTTAGAGGGCTTATTGTCAGAGATTCGACTGTAACAATACACTTAATGCTGGAGTATTTGATGGATGTGGTGTGTGTAATGGTGACAATAGTACATGTATTATCCGAGAGGGAAACTTTACTGATGATGTGCCTCTATGGGGACAGCGCGAATGGACAGAAATACCAGTTGGTGCATATAACATAGAAATGTCATTTGTATGGAACGATATGAAACAATATTACACAGAAAT
>EduN_5732
CCCTTTTCTAGCAAATGTCAATAATATAACACTAACATGACTAACAGTCGTGGATTTTGAAATGAAATTTCACTCAGAATAGCTTCATCAGCACCATTTACTCACTCAAACAACAACATTCATATCAGACATACATTGGTCCCATTGAAATACATGTAGTGGTAAATGCTTCACAATATTCAAAATATGATTTGAAAGGGAGAGAAATTCAGATCTAACAAAAGACACTAATGTCTCTAATATAAACTTGTCTTTTTCATGATTTTGAGGAATTCTTCTTGATTGATTTCACCATCCCCATCTCTGTCTGCTTCATCTATCATCTCCTGTAATTCTTCATCTGTGAGATTTTCCCCTAATTCTTTTGCAACTCTTTTTAAGTTTCTGAATGAGTATTTT…
>EduN_5745
GCGTATCTGGCGGTTCCAGTAAGATTCTTATCTTCCCTATATGCAATGTGGGTTCTTGTTCGACTATCTCTGTACTTTTTGGCTAGCCCAAACGTACGATACAAGAAAACTTTAGTTTGTCAGTGACGACCTATTCCCACTCAAGAAGTTATCAGGTTTAATGTCTCTGTGAATGAAATTTTAATTGTGGACATACTCGATACGTCCTATCATTTGATCTGCAAGCATTAAAACGGTTTTCATAGTGAATCTGCGTGAACAGAAGTTGAACAGATCTTCTAAACTTGGCCCTAACAAGTCCATAACAAGAATATTGTATTCCTTTTCTTGACCATACCAGCGTATATGAGGAATACCCACTCCACCTTGAAGAATTTTATAAAGTTTACTTTCATAAAG…
>EduN_5747
GCTGAACACAATAGCACTATTGTTAATAATTGATGAGGGTTAGATTCTGGGAGATTTGGTTCTTATTGTGGATAAAGATACATCTGATCTGCTTCGCTTTCTTTTTGGCATAAAAGACAGAAATCTGTGTTTGAACGACTTTCTTCTCAGGTTTATTGCACACATTAACATTTTTCTGACTAGAACAATTCTCCTCCGAGTTGGAAGATTTTTCACTTATGTCCTGACAAGAATCTAAAGACAACACAGATTGTAAACTTCCCGTTGTCTGTTTCACAGTATTTATGTCACTAATTTTCCTTTTCAATTTCACTGGATAGTCTCTGGTATAAAAAGACGGAATATATTCCTTTTCTTCACAAACTTCCCACTGGTATTTCCCTTCTAGAGGAACATCTT…
>EduN_5760
CAGCCACCAAGGTTTGCATTACGAATAACTACACCTTCGTTTGGTCTTGGATTGAAGTAGAAAAGACGCACGTCTCGTTCTCACAATCACATCCAAAGTTGATGCTGAATGGTTCATTGTCCATTCCTGCTCCTCGGATTCTGACGGTCTTTTCCGTACTTGCATACCTCCTGGAATCTCTGTTCTATATGGCAAACCATATCTATCAAACAAAAGTGATGTCATAGTATTCAGCACCGTCTGTCAAGTGTAAAGAAATGGACATCTACCCAAATCAACACGGTGTGAGTAGTTGATGTAGTTGGTTTTCCGTTGACATATGTTCTGAATTCACGTGGCAGTTAACTTCAAAGTACGGAAGATGAATGATCCTACCGTCATACAAAGTAGGGAAATGGT…
>EduN_5763
TTATTCTTTACATATAGTTGTTCTAAATTGATATGTAGTATCCTGAAAAGTAGCAGTAGCCATATCCATGAATGACCTCTGTCCCTGACCTATGTTTCACACAAACTTTGTCGCCCTTGGTTAGCTCTACAACAACATTTGCACTCTCAGTGGCTCCATTTAATGCTGTTCCATACAGCAACACTATATCATCACCATTTTTGTTAAGAGAAGCATGGAATTGACCATTATTTCTAGACATGATTGTGGCTGAAATTTGATAAAGGCCTGTCAGTGGTACTATGAAGTAACCAGTACTGGGATCATATCCACCTCTACGATTCAGGATAACATGGTTAAACTTGATAGGTACGTTTCCTATTATTCTTGGCTCCCCCTGTTGTAAGACTCACTGTAAAT…
>EduN_5868
GACGAACTTGCCTCCCTTTAGCAACAGGGAACATGACGGCGCCACAAACACACAGGTTGAGTGCTATTCCTGATAATGTTAGTAAAGTGCCCCTCCATGCAGCGTATTCTAGGAGGTACTTTATTACTACAGGAAATGTAATTATACCGGCTCCAATGCCGCCCATAACAATAGATAACGCTTGAAATCTTTTATGGTTAAAATACTGCTCAACAGCCATTATAGATGGTGTACATGCGAGTCCAAATCCAATACCTGTTATGACCCCAAATGTGAGGTAAACCTGATACAGGTCCGTCACAAACATCCCCAGTCCTAGTCCTATAGAGGAGATAACTCCGCCTAGCATCACGCTGATCCGATACCCAAACTGGGACATAAAGCATCTTAAAACGATAC…
>EduN_5870
GAGATATAGCCCTCGTATCTGGCAGTGACCAAGGGACTTCCTGATCCACAGGTTCTGTGCAAACTTGTTACTCTGATATCTACTCGTGTCAGCATGTCAAATGATCCAGTGACAGTTGTCAGCGGTAATGGAGCCAAAAACTGTGGTGTTTTCTGTACGTTTGCTAATGCTGTTTCTAGTATGACAATAGATAATAATGCAAACATATTTCAACTGGCTAGACTGTTGCAGTTGAGGAGACCCGTATTTTTTTGCTGATTTTAATGAGTACCGTCTATGTTATGAAGCTTTGAATCTCTATTTGGAATCCTCAAGTGTATACGCAAATTTCTAATTGATTTGGAAGTCATTTCACGGATGACAATAAAGTTGGTGGTGACAACTAGGAATTTGGTCTTAT
>EduN_5876
GGAGAAAAAGGACAAAGGAAATAGGTGTTAATAGTTAAATTCCAATACACAGATAAAGAATCAACAGGCACTTGTGCTGTCATTGTTACTGGAAAAAACAGATCAATGTGTGCAAATTTAGCAGCAGCCAACCTTTTCACAGAGGACCATTTGAATAATCCAGAAAATTGGTCTTTGGTAGAAAAAGCACAGTTTTATTACATCGCTGGATTTGCATTAACAGTTTCACCACCATCCATCCTTAGAATAGCTAAACATTCCCATGAGAAGAATAAAACTTTCTGTATGAACTTGTCGGCACCTATTTTTATGTCAGTTCTTTAAAGACCCAATGTTACAGACATTACCATATGTAGATGTACTGTTCGGCAACGAAACTGAAGCAGAAACATTTGCAAA…
>EduN_5885
GATTGCACATCCTTTATCTCGTATGTCAGGCCCCGGTAACTTGGATGTTCGTGGGGTGTCTCGTGATAGCCATAGACCAAATTCACAACCTTTAACAGGAAGACCATTAGCTAACGAAAATGTTTTCACTGGACGTAAATCTGTAAGTTCTTATGGCCGGGACAGCCGACTTGGTGTTAACCAGCAAGTGGTGGCGATGCCGCATGATTCTATTCCTGAAGGAGTCGAAGTTACACATGGAGATCCAAATACTACAAGAATGCCCCTTTTTGGGAGCAGAGCCGGTATGGGAAGCAGAATGGACAGTCGTATGTCCTCAAGGTTGTCTAATG
>EduN_5888
GACAGAAAGGGGAACCTGGAAATAGGGGTAGTGGAAATGGAGGAAGCGGAGAAAAGGGAGAACCAGGTATAAGTGGTCCACGTGGTCCACCTGGATTGACCGGACCTCAGGGGCCAAAAGGGGATCAGGGAATACCAGGAGTCAATGGACTACCTGGCCAAAAGGGAAATCCAGGAATGAATGGTATTAATGGTTTTCCCGGAAAAGATGGGTTAAATGGATTACCAGGACCTAAAGGTATAGCAGGGATGATTGGCGATCGAGGATATCCGGGCATTCCAGGCACTCCAGGGGGACCAGGACAAAAAGGAGAGTCTGGTGAACGTGGTCTTATGGGACCCCCGGGCTTGACAGGTCCTGCGGGCCCTATAGGAGTTCCAGGAGTAACAACAACAATTG…
>EduN_5899
GTTCTTATAATTTGAGAAATTGTATGCATTTTCATGATTACCAGGGCATGTCATGTATGGTACCTGACCAGCAATTGGTTGCACTAAATTCAAGAATTCATCCCCAATATGACCATTTTGTGCATCAAGGTCGTATCCAAAGTCACCCACATGGAAAATAGCATCATACATCCCCTTTTTGGTTTCATTAATAAGCCTTGGTACAGATTGAGGATTAACAAAGCCGAGATCAACCAAACAGAGCTATCCTTGGACTCCAGTCAGATCCATCCTTCA
>EduN_5906
CTTTGTTTCAACTGTTCTCTTTACAGCTTCAAATTCCCTTTCAATATCCAAATAAGCCAAAGGGTCGTTTTCTCTTAAAGATTGCATGGTAGACTCACCAACAATGTCTTCAAGTATTTTAAAGAATCTTTTATCTACGGATGTTCCTCCGCAATCATTTCCTGTGGCTCGATGTTTCTCTATTAGTTGACCGTTAGCGGCTTTCCGGTGGACCGTTATGTCTGCAGTGCCACCTCCGAGATCCACGACCATGTACTCTGTTCCCTGCGCCGACATAGCAAATAATTTCTCAGCTTTTTATTTTATCAACTGGTAGGTACTGACAGAAAATTGATGCTGTTTCTGGTTCCAGGGCCAGTATTAGCTTATCCGGAGGAATACCTGCCTGTTCTGCACTTG…
>EduN_5910
CAGAAATGAAGAAAGATAAGCTCAAGTTTCCAAAAAAAATGATGGCTAATTTCTTCTCTCCGTGCATTGAAAGTATAATTAAACATTGTAGAACAGTTCTAGATCTTGCTGGTGCTGATAAGGTGCAGGATGTTATCATGGTTGGTGGGTTTGCTGAATCAACGATTATGCAATTACTTGTTAAAGAAGCATTTCCAAAACAAAAACATTGTCATTCCACCTGAATCCGGATTAGTTGTTCTAAAAGGTGCTGTTCTTTACGGACACCATCCGAGGATCGTTTCCTGTCGGGTTGCTAGTAAGACAATTGGGTTACGAAACCTGAGATACTTCTTGAAAGAGACTGACCCTCGAAGAAAAGAAAAATAGATCGAAGGTGGGAGTTCCCTACCTGCAAAG…
>EduN_5911
GTTTATACGTACTTAAGTGATTAAAGTTTAGCAATCGATGACACGGGTATCATAATTATAAGACTGAGAGCATAATTTGGGACGCTAAAACTGCAAACACAATCAACGAAAATGGCAATGACGGAAGATCAGTTAAAGGAATTAGAAGAGACATTCTTAATTTTTGACAAAACTGGTGACCAGGAACTCGATGTTGAAGAAGCAGGAAGAATGTGGAGATCAACAGGATTAAATCCGACCAAATCAGAAATACAAGAGATGTTCAACGAAATTGACCAGGATGGTCGTGGAACGATAGACTGCAAAGAATTTATATCATGGATGTCAACAAATGGAAACAAGAATTTTGTTGATAACTTGGAGGAAGAAATGAGAGAAGCATTCAGTAGTTTTTGAATA…
>EduN_5945
AAATTTTTAATCGCGCGATGTCCAACGGGATATACATATGGATCATCCTGTTCTTTCAATTGCTTCCTGAGTTACATTCTTAAAGGCAATGAAAGTGTCTCTTGTGAGTTAGATACAAGTGGTAAACATGGAGTATGGGCATGGGATAATGATACAGAATCATTCTGTGAGAAACTCATGTGTCCAGATTTACCTGCTCCGGCCAATGGTGCCCTTGCCTGTTCAACAGTTTTGGGTAATCAAATTTGTACAATGGGTTGCAATGACAGATACCAGACCCCTCTGAAACCCCCTTCAGAGTTCGTGTGTAATGATGAACAAGAATGGATTAATGGGATGCCTCCAAACTGCAACAAAAAAGAAAG
>EduN_5956
ACTTGACAAGGTCTTCTAGATATTGGTATCGTAGTTTTTTCCTCGCTCTGCATTCCCTGGCACTCTGTCTGCTACGCTCAACCTTTACTTTAGCATCAACGTTCAGTGGTCTTCTACCTGGACGTTTTCGAGCCAACTTTGCTGGGACTCCCGACGATTCCAAAATATCCATGACTGTGCTGTCCTCTTTAAGCCTGCTCCAACCTTTGAAATCTGTTTGCACCATTTGTAGATTGAAAATTACATATCCTTTCACTTTGAATATTCAATCGTGTTTACTTCTTATTTTGTAAACTATTCCATTTATATCTCAGTGGCGAAATTTGATTTGTTAAGATGATGAACTTCAGGGTTAAAAATCTATAAATAGTAACATAGTGGAAAATCGAGAGTTCTAGT…
>EduN_5975
GGTGGCAGGATGGCTATCTACCACAGTAGAGAAAACCACTTCACTGGAGAATACTTAATCTACGGTGGCCATGGTCAATCAGGGTATGGCGGATCGGGAACAGTCTACCTAGAGGATCAGACTAATTCTACATATCATGTGCGAGATCTTATCATAGACAACTCTGGTTACACAAAATCAGAACAAATTGAAGAATCAGAAAAATTGTATTTAGCATATGGATGGGATGTTAGTTCTGGGTACTACACATATAACAACATATTGATTGTGACTGATGTCAATGTATATAGAAACTACTATCTACATAGGATAACTGA
>EduN_6063
GAAAAATATATGTAAAGTAATCCTCACATGTAGTCTTATACAAATTATTCAAACAGTCTAAAATAATGGATGATATCCCATTATCTTCACCATTGGGTTTCTCGGCATACTCATAAAAATAACAATGGACCCGCTCCACTGAGCCTGTGGACCAACTCAACTGGAAAAGCAGTCGCTTAAATCAGATTGTTCATAAACTCTGAGACTGACAGTCGTGAAAAGTGCATGGATAATGTGAACGCCAGGAATTTAGTGTATTTTTTTTTCTAGTTCAGAGAAATGTGATCCATGGGAGGACTGTCATGTATTGGTACTAATGTGTTGTACTTTAACTACGCTATTCTAATTTGGTTGGTCACAACAACAGCTGGATACTGGTCAGATTGGAGCGAGTGGAGT…
>EduN_6104
CTGAATTGTTGAGCTTCCAGGTAGCAAAGACAGTACCTTCTGGGTACATAACGTGTGCTTTACAAATAACAGTTACACTTCTCCCTTTCACGACATCACCTTCAGATGTTAATGCAGTGATCGTTATATTGGCATTTCCTGTAACATTTAAAATAGTTGATTGGCTGTTTCCAATTCCAATAATATTACTAGCAAAACAAGTGTAAAGTCCTTCGTCAGCATTGACAACATTAGAAATTGTAAGGGATGGATTGATGACTGAAGACCCATGGTACCTGCTACCAATTTTAAGTACCGTGATATCACCGCTTATATCTTTGGTCCAGAATACTTGTTGAAGTGCATCATCTGATGATACAGTACATTTAAGCGTTTTATCTTCGCCTCGATTAAACAAAA…
>EduN_6118
TAAAAGTTGAAAAAGCTAATTTCCAAAAGATAGTCATTGCAGTATTATTTTAACTGTTAGTAACTTTGCTGGAGAAATGACAAAGGGTATTACTCTGTTTTTGGAGACGCCTCCAACACTAAACTGTACAATCATAGATTATGTCTATTTGATAATTTTGGTTAATGATTTCCCTGGACAAGTGCAAGTAACATTCTTTTGTAATCTCCACCACATTCGCTTTCAACAGCTTCCCCCAATGGCTTTTCATATAATTGTTGAAATTCATCTTTGATATCTCCCAAGTCAATCTCGCTTCTGGAGACAATAAGTCTGATTAAATCGGAATCATCTGTACCAAATCCTTTCATAGCTTTGTTCAGTCTCATAGCAAGTATTTTGTTTATTTCTGGCACACTG…
>EduN_6129
GAAAATATCGAGTATACGTACAAAAATAAAAATCATTCTTTTATTGTGAATAAATAGCACTCATGGTTGTTTTCTAAATGAGAATGTTCTTAAAATAGTTTATATATAGTTCCCAATACTTTTTTGTTCTCCCATAAAGCTGCACAACTTTATTTTCTTAGACCAGAGGGTAAGAAGCCTGGGTGGCGACGCCGCACATGTTGTTGTGGTCCCTGGCGATCTTGATGTAGCCCTGATCTCCCCAGCTCTCGCCCCAGGAGTTCTTGACGAGCCAGTACTTGCCGCCGGCCTCCTCACCGTAACCGATGGCGAGCACGCCATGGTCCAGCTGCGTGGGTGTGGCAGTTCTCGGTCGGCGTACACTCCAGTGTGGTAGACTGGAAGGTCTCCTGTCCGGCA…
>EduN_6171
CAGAGATTTACAAAAATGGACCAATAAGTTGTGGTATAATGGCTACAGATAAACTGGAACAGTATGCTGGTGGAGTTTATATGGAGAAAAATGCAGAACCATCAGTAAACCATATTGTATCAGTAGTTGGATGGGGAGTGGACCCTAAAACAAATACAGAATTCTGGGTTGTCAGAAATTCCTGGGGAACACCTTGGGGAGAACATGGATTTCTGCGTATTGTTACCAGTAAATATATGGATGGCAAGGGAGACGACTACAATTTGGCTATAGAGAGTCAGTGTGGCTATGGAGACCCAATCATTCCACCAGGATATTAATGTGCCGTCCTTATTGTTGTGTGATAAACATTCCAAAGAAAACATTTTAACCTGACTTTTAGTTAGGCACCAGTATTTG…
>EduN_6195
GAAAGTTTTATAGATAAGAATAAAGATACTTTGTTCCAGGATTGGAAACGACTTCTGTATAATAGTAAAGAACAGGTTCTAAAAGAAATGTTCCCAGAGGGTAAACAGCACATCACAGAGACCACAAAGAGACCAATAACAGCAGGAACAAGCTTTAAAAACTCTATCATAGCATTAGTAGACTATTTTAGGTTGTAAGGAACCACATTATGTGAGATGCGTTAAACCAAATGACCTTAAATCACCGAGTGTCTTTGATCAACAGCGGATCAAACATCAAGTTCTTTACCTAGGATTATTAGAAAATGTTCGTGTCCGACGAGCTGGTTTTGCCTACAGAGCTCCTTACTCTAGTATTTTTACAAAGATACAAGTGCCTGACAAGTCATACAT
>EduN_6198
CGGATGCATCACTGTCAGAATCTGAATCATTTGGATGTTTAACTCTCCCAGTTTCATCAATTTCTTGTTCCTTCGATCTTTTCTGCATGTAAGCCTTTGGATCATAAGCATATGGTGTCAATGCTGTTTTTTTGTTGGGATACAATGACCCGGGGACGTGTCCTGATGTGGAGGTAGTACTACAGAGGTAATCTTCACCTTTATATAAACCTCCACTATTCTTACTCGTAGAGCGACTAGTGGTAGAGGAGGCTGTTATACCAACACTGGTTCTGTTTATATTGCCCTCATATGATGCTTCATTTCTGTAGGCTAAAGCTGACCGAGAAACAGGAACTACCTTTTACCAACGAGTATTTTCTTCTGACTTGATTATTTCTACCTTGACTATTTGAGATAC
>EduN_6221
ATCATAGTTAGGCTCTACTTAACTTAAATGAATTAAATTATTTACTTTTGTTTTAATAAATTTCAACTTTTACTTAATATTAAATGCATATAAACCAAGATGTAGAACTTTTATTACATAATGAAATTATACTAATAGATTCTAAATCTTGAACCTTAACATTCCACATTTACATGACAATGTAGTTTTAGTGTAATCACATGATTTTTAATATTCCAAGCAGCGATCTTATTAAACTTGTTATGATTTTGTACAACTAATAAATTTAACTATGAAAACTCCATACATTTTGAGACAACAGTAATAGATCTAAAGCATCCATGTTCAAGTCAAATTCACAAGTAACTACACTAGACATAATTCTGAATACATATCCTGGGACTCTATACATTGTCTATG…
>EduN_6244
GCAGAGTATCATAATAATGACACTGATGTTTTTGCTGTTTGTAAATACATCATTTATTTACCGCCCATTGTAAATGGGAAGTCAAAGATCGACATATGTGAAATTGAAATTGGTGGATGTCCATATGGGAAATATGGAGACAGCTGTCATTTGACATGTTCCGAAAACTGTATGGGACCTTGTGATTTGATAACCGGAAACTGTGTGTTCGGTTGCACAAGTGGTTGGCTTGGTGCAAAATGTGATAGAGGTAACTAGTTTCTTTATTTCATCTAATGTCTTAATAATGCATAGTGCATTAACTAGATATATTAGAACTTTCATATACCAGGCCTAGAAAATGAAAT
>EduN_6290
GTTAAACCATCACTGACGTTATTGAATATTAACTTTGAAGATAATGGCAAATATGTGTGTATAGGAACAAATTTTCTTGGGACTGGAAGTAATGTCACTACCCTAACGGTCACTGGAGGTGTTCCTAGCGTTTATGTATCATCAACTGTATATCATGTATCAATCGCCGATAACATAACATTGAACTGTAATGCATCCGGTTCCCCAGATGTTATCTCCGTAGCATGGGAACGAAACACAACAGGATTGTCAAATAAATTGTACAGCGGAGGAACATTGTCTCAACACTCACTGACACTGTACAATCTTGAAGCAATAGATGGGGGGTGGTATATTTGTACGGCGACAAACTTGGTTGGTACAGGGAAAAGTTACCCCATTCATCTGAATGTCACAGGA…
>EduN_6308
AAAATAGAAAGATGCATCATAACTGCCAGTCAATTGAAATACATAGCCTGCCGAAGGGGGGCCATATATACCAGCAATACCACGGCATAATGTCAGCAAACCAAAAGCATTTGTCAGCTTAACTGAGGCCCAGTAGGTCACATAAGATAATCGATGTCAGTGAGATGTAAGCAGAAACACAACAATTCCATAGACAACTGAGAATACAATCAACAGTTCATATGTTGTACATAGTGGCTGGAGGAACAGACTGATTGAACTGATAATAAGGGCCACGTTGTTGATTACAAGAGCATCGACGTTCTTCATGT
>EduN_6328
CATTTGGTCATTTTTTCTATCTGTCGTATATTTTGGTCGATTTCAATTCGCTTGCATAAAATTCAAAATGAGCATATTTGTGTTGATGCACCAATGGGTAGTAATCGTGCTCCTGTTCAAATTCTCCAATTTTACAAACCTTTCCAATTTCGATATGTTTATCAAAAACGTCATCAACCATGCGTTTACCACCATGTCCACGAATAGCTGAAATTTTGCTCTCGTCGTAAACATCTGGGTCGTACGGTTTCTGCATTGCTACACCATACGTATATTGCGATACCCTTTCCGTAATTGCCTGGGGTTCGAATACCGTACAAAACGGCGCCTTTCAAGACAGCGAGACCTGGGTCTTTCGGAACTATAATGGTAAGGTTTGGAAACTTCTCTTTTATGGCG…
>EduN_6361
CTAACAGGGTAAGGAATACATTCTTCAGGTTTCACAGGCAGGGACATCAATTTGTCTCAGTGGATTTATAGGACTTAATGTTCCTTCCCCATTAGGACCCCTTTGGATTTTAGGGGATGTTTTCATTGGTCCCTTTTATACTGAATTTGATCTTGGAAATAATAGAGTAGGGTTTGCACAAACCGTACAACCCACCAAAAAATGGAATTTGCATTAAATGTTACTTGAACTCATGTGCATCTGCATGAGTCCCTATTGAAAAACACAAGGGTGAAACAAAATATGTTGCAAAACAATCTTTGAATCCAACATTTGGCTCTTTCATAGTCTCTGTTTGAAAAGAAATGGTAAATGAAATCAATAACTTTGAAAAAATGTTACCCAGAATACTTTAGTTTC…
>EduN_6377
GTCTGTTTGGAGATAACGATGGAGACGTAGGAAATGATTTGCATTCCAAGGATAATGATTTGACACAAGGCAATGCCTCAATGGTCACAATTCATAATGACTTTGGATTATCATGGAGAGCCGCAGAAAATGAATCATTATTCACCTACACGGGTGGCAGAACTTACGAGTCATATCAGAATTTGAACTTCGTTCCTACATTTGATATACCTGCTAATATTGACTCCCACAATAACCCAACTGTAGTAAATCAAATTCAGACTGTATATATGATTACTACGTGACTGACAAATCGTAGTATTTGGCCAAATGTCGGCAAACGTATCTGATGAATTTGCAAGAATTTCTAGTTATACTATCCCAGTTGCTACATGCGGATTCCCATCAAACGTAAGTGAT…
>EduN_6441
AAAATGTTGAACTGTTATCTCCACCTTACAGTCTGAGAAAAAGTTTTTCTGTGTTTGATATAAACACGATCCATTTTGATCAGTTTAACAACTGAACTGATTGTTTGTGAATTATAATGACCCTTTGAGACGTATCCCCACGTATAAAGTTCATCATTCTTGTTTAATTGGAAGTGAACTTCATTGCTACCTTTTGCACGAATTAAACAGTTAAACTTGTATATGCCACTTTTTGGCGCAGTGAACACACCTGTTGTAGAATCGTATCCATTACCAATATTGGTTCTGACGTCATCAAATTTTAAAATTGTAGTGATATTTGTCAGGGTGGTATTCTTTTGTCAAGGAGGCAAAGAAAACCGGTCTCTTGATATTTATTTTGGTTCTTAGTCTGTAAGG…
>EduN_6444
ACATGGTTCTGCAAACAGGTCAGTGGCCGTGTCTGGTGCCAGACGCAGTTTATCTCTCTCTAGTTTTGCTACATTTGTACCCTGCAGTTCCTTACCGGAAACAGCCGTGTAAGCATCCTTTAAGGACACAGGCACTCGTATTGTAGTCTTACTGGTCTGACCAGATTTAATTGTTCTTTTCTTTATTTCAAATTCACGTTGTAAATCTAAGTGACCAGATTTATTTTCTTGTCGAAATTTCTGTAAAGCAGGCTTTCCTGCAAATTCCTCCAAAAGTTTTTCGAAGGCCAGGTCGACTTTCGTACCACCCCAGTCGCCACCATTGGCCATGTACAGTTGTTTAATAGATTCACCCTCTTGAAC
>EduN_6460
GGGAAATGTATTTGTGAGACAGGATTTGAAGGATCTCTCTGTCAACATAACATAGATGATTGTATGAACATGCCTTGTCAGCATGGTGGAACCTGTAAAGATATGATTAATAGCTATGATTGTCATTGTGTCACTGGATATGATGGAGATAATTGTGAGAACAATATAGATGACTGTGTTGGAATGTGTACAGGTTCTAATGTAGATACTGATAAATGTGAAGATATGCTGAATGATTATAGATGTAATTGTAAAGCAGGTTACATTGGTAAAAATTGC
>EduN_6491
GGTTTTCGTCCGTTGATGTATAAACGGTACATTCCAGTGTAGTTTCGTCCGGTTTGAGAGCCTGGAATATTTGTGATACTTCATGGCCGGGCGTTATTCGATCTCCCTTCGTCATATACTTGAAGAAAACATCTTTGCACCTCACTTGGCCATTTATAGTGACTTTTTTTGTTTCCGGGTGCATATCCGGGTCCCAATCCGGCCAACTTTGAATACCATATGTAACTCTCGATATACGTTGGCTTACAACTCTAGGCTGGTGTCCGAATAAGACGGCTCCTTTCAGAACGGCAAGGCCTGCTTCTTCCGGAATAATCAATTTTCTTGGAGCGCCAATCTTTGATCTTACAGCATCTTGTAGTAGCTCACATTCAGAAAATCCTCCGACCATCAAGATGG…
>EduN_6510
TAGTTCGTTGTAAATAATAAGGGTAGAAATGTCTGCTGTATACAAGTTGCCATTGACATCGATCGTCAATATATCTGTGCCGTTTAATTGGTCAATTGACTCTTTCATGTCTGTGTAACCTTGAATTAGATCTATAAGTTCTTGTGACACTATATTATTAGCAAAGAATTCCTGCAAATTCAAATCGCCGATTTGTGTGAAATCTGTATATAACTGAATTGTCACTTCAAATGATGAAGATCGTTTCTTTCTACCAATATTTTGACACCCTGATACCTCTGTTTTCACAGAGCATGTTTGATTTTGAATACACTGAAGTTCGTCTAGTTTTGTAGAAATCGTAGACATCATCTCTGTCTGGTCATCACAATTTACACTGTAAGTTGCAACAGTTGAAGT…
>EduN_6519
AGGTGGTGACTTTCCTAGTCAGTCACGGCAGTCAGTTAGAAGCCACATCCAGGGTTGGAAGGGACGACCACTTAATGTGGGCGGGCTGCGGGAGGACACCTGGAGGTATTGACTTACCTGGTCACTCAGGGAAGTCAGTTAGAAGCTACAGACATGAGTGGACGCACAGCTTTACATTATGCTGCTGAATATGGAGAGATTGATACAACAAAATGGTTAGTAGATCAAGGATGCAGTCCTTGGATGAAAACAAAAGAGGGTAAGACTCCTTATGATCTGGTAAACATAGACAGCTATGATGATGAAGAGAG
>EduN_6525
CAATTGACCTTTACCCAAGGTGACTCTGTGCAGTATTTATGTGATGTTGGGTATGTTGTTTCTGGGTCTAATTCTGCCACAACAACTGTATCTTGTCAAGGAGATGGCACATGGAATCCAGCTATACCTACGTGTACACCGGCCACATGTTTTCTGGATGTTGTTGCCGATAGTAACACCACACCTACTGGTAGTATCAATTACAATAGTGCCTATACCCTCCAGTGTGACAATACCAACAGCACTGGTGTGACCCTGAGGAGATTTTGTGCCTATAAACCAGATACCAAACGTTATGGTACAGTTGGAGATAATTTGAATTGTCCAGCTG
>EduN_6553
GGAATGACAGTATCATGTGAAATATCATTTAATTTGTAATGGGATGTCCAAATAGTAAATTGGTACCGGAGGGTCCGACTGACCAAAATGTTGTCGAAGTTTTTGGCAGTAGAACTCAAACACAAACACGATCTGATAGGCCCAGGGAAAGAGACCCGCGAGGCACAGGCCCACCACCGGAGGGTGAGCGGCAACATCGAAAAGTGAAAAGATATCGTGACAAATTTGATCCTAGAGTGACGGCAAAATATGATATTAAGGCTTTAATAGGGAGAGGAAATTTCAGCAAAGTTGTGAGAGTTGAACAATAAAAACACGAAACAACCATATGCTATACAAAATGATAGATCGGTTAGAGGGTAAAGAAGTGTTTGAATCAGAAGTTGCTGTCTTGCGACG…
>EduN_6559
CTAATAACAACCAGAAATATCAAGGATCAACTGTAGGAAACCCATCCTTGACCATATTGAACACAGTGTCAGGTGATGCAGGAAGATATGTATGCTCAGCTTCAAATGCTGTGGGTACTGGTAACTCTGGCACATCAACATTAGATATCACTGGAGCTCTCCCAATTGTCAACATACCACAAAGTACCTATGCTATTAGCATTGGTAACCAGATAACTTTAGGATGTACAGTTTCTGCTACACCAAAGAAACTGCTGTCTTTTGGACCAGACAATATCCCAACGCTGGTGAAATAACAGTATCAAAGGTCAATTCTGCCAAGTACCAAGGCCAGACAGTCAGCTCACCATCTTTAATCATCCTGAATACTGACTTTAATGATATAGCTACTTATCGGTG…
>EduN_6563
GTTTAGTAATAGCAACGGATAATACATCTTTTCTTTCCGTTGCTTCATTGATATGTACAGCTTGTCCAATTTCTTACATGTCTACTGAAAGAATCGTTACACCTGGCGGTTCCATCTACCATTTTTCTTTTGCTTTCAGGATCAATACCTTCCTTGAACCTGGACATTGTCCGAACTCCATATGTGAACTTACAAACCCGCGTAGATATAATTCTTGGTTCATAACCGTATTGAACCGCTCCTTTCAATACCGCTAAACCAGCCTCGTGTGGTATAATTATATTTTTATCTGGAAAGCTTACTTCAACAGCTTTTCGAAGCATTGGAGAATCGGAAAACCCAACCAACCATTAGTATTGTATTTGTTCCTCTTACTTTTTCTTCTTTAAATATGCCTTT…
>EduN_6584
GTTTAATCGAAAATCAAACAAAGTAAAAGAACCCATCACAATGAAGATGTTGATATGGAGCATACTATTCATTTTATTGAATGTTATCGCAGTCGAAGCTAAATGTGAAGGCAAGCGAGATATTGTTTTCCTACTGGACATGTCTGGAAGTGTGGGTCTTCGCAATTTCAAAATAATGTTAAATACTGTTGCCAGAATTGCAGATAATTTCTACATTGGACCTTACAATACTCAAATTGGAGTCGATTGTTTTTTCAACTTCTGTCAAAACGGCAATAAAGTTGAAGGACTATAACAACAGATACTACCTTGAACGTGCCAATAAAAAGAATTAAGTATGAAGGAGGTTGGACCAATACTTACCGCGGATTGAATCATTGTTCGATA
>EduN_6589
ACCGCCTATACCATTATCAGCTTCACAAAAATAAAACCCACTATCAGCTTTGGTCACTGATGGCACATCCAACAATGGACCCTCAATTACATAGTTGTCATTCCCTTTCTTTTTCCATTCAACTTTAGGTTCTGGAACACCAGAAGCCACACATTGCAACTGAAGTGCAGAACCATCATTCAAAAATAGTAGCCCATGACCATAATTAAATGTGTATGCATCATCATATATCAAATCCTGTATTTCGGGCATAGTAGTATACTTTAGATAGACAGACTTTGAAGACCATTCCAATGGATCATCATCTGTATTTTCACGAACCACACATGTATATTGTCCTTCATAATGAGGATTAGAACGGTTAGAACACAACAGTGACACTACTGTCTG
>EduN_6644
TAATTTAAGTGAGGACTGTTGTAATTCTGATGTAGCTGTTTTAATATTCTCTGGTGATTCATTTTCTTTATTTCCTAAAACTTCTCTTACTTTGGCAATTTCTTCACGGAGTTTATCACATTTCTTCTTGTGGCAACTGATCTTTAAATTCTGTCATCTTTGACTCTGTATCATGTACAATACTTTCTGCTGAATTTACTGCCTCTACTAATTTCCTTTCGTCTTGAATCCTCAGCAGCATATTTTTCTGCATTCTTAACCATTATTTTCAATTTCATCTTTAGATAAACCTCCAGAGGACTGTATAACAATTTGCTGTTTCTTTTCCAGTTCCCTTATCTCTAGCAGATACATTGACTATACCATTAGCATCAATATCAAAAGTAACTTCTACCTGTG…
>EduN_6654
GTTGCCATAGATATAGGAAGTTCCGGGTGTGGATATGCATTCTCTGCAGACTACACTTTTTGTAACAATCCGTGTGATGTGTCAACTTATAGATGGTTTGCAGAAGTTGGTAAATTTACATCTCTGAAAACTCCTGCAGCCATTCTATTCGACTCAAAACAAGAGTTTGTTTCTTTTGGCTACAATGCACAGGAAAAATATATCACCATACTGGAATCCATTGAATAAAAACAATTGGTATTACATAGAAGGTTTCAAAATGGCATTGTATTCTGCAGTTGAATCCGGAGAGGATATTAGAGACGTACTTTAGTAATAAAAGAGATGAGT
>EduN_6662
CTTAATTCATATAGCTTCTTGTCAAGGTCCAAAAGATGTTGTATTTGTTCTTGATAGATCTGGAAGTTTGGATGCATCTGACGTCACCGATGCTATTGAATTCATCTATAACGTTACAACATGGTTGACAATTGGAGACAACAATACATTGATATCATTAGTGACATTCAGTGATGATGTCACAGAAGAATTCAACCTGGGAAATTTTCCAAACAAAACTGACTTACTTTCTGCAATAGAAAGTTTAAGTAACATGACATCTTATGGCGGTACTTATACTTTGACGCTTTGGAATTTGTTCTTACGTCATCTATTTAATGAAAGTA
>EduN_6695
TGGAGACCTTAGTAATGACCAGTTACTGGAAATAGATCTCTACTTGCGGAGGTATGGATACTTAGATGACCATATGCCTGGGACGAGTATTTTAGCTTCAGCGGAGAATAGAAAATATGCATTACAATTTTTCCAGAATTACAACAAGATTCCTATTACTGGTGTATATGATGCCGCTACAGCTGAACTGTTTGCTAAAGCAAGATGTGGCTGTCCTGATGTCATGCCACAGAAAAACGAAGCAGCTATTTTCTAAAGAAAAAAAATCCTCCAACTCCTGTGCTAGTTTAACTTAGGAACAAAATGGAACAAGAACCGAGTTACATGGCGACTTAATTCATTCAGTAGG
>EduN_6697
GTGATATGTTTTCCATTGTGTTCGAACCAGAAGCTGCATCTGTTTATGCCAGGCTTTTGCCAGTTGAAAAATTCATAGGCGAAAACAAGTCGACTATTCTGAAGACTTTTGATCCAGGAACCAAATTCATTGTTGTAGATGCTGGAGGCGGTACAGTTGATATTTCTACTCAAGAAGTCGCATCGAACGGCGAATTGAAGATTATTCACAGAGTATGTGGAGGCTCGTTGGGGTGGTGAAATGGTCAATCAGAAATATAGAATTGTTCTAAACAAAACTTGTTGGAGGTCCTATTTTAAAACAAATTTAAAAGGGAACAAGGAGCAGATTATAATGAGATGATGAGAGATTTTGAGACGTAAAAAGAAGACATAATAAATTAAACAGTACAGAAACTGT…
>EduN_6734
GTCCGCTGCATTTTCAACCAATATCTGAACTATTTTTTCATGTTGTCCTGCGCATGCAATATGCAAAGGAGTATCTCCTTGACAATTTCTTTTATTGATATCAGCTCCCCTTTCTACTAAGAACTTTGATATTTCATAATGACCGTCACGACAAGCGACAAACAAAGCTGTTTCGCTTGAATTTGAAGGTATGTTTATAACCGCTTTATTTTCTACCAAAATTTTCACAGCTTGCAAGTTACCTGCTATGCATGCGTCGTACAAAGGTGTAAAGTCACAACCGTAAGTTTTATTTATATTAGAGGATAGAAACTGAACT
>EduN_6743
AACCATATTGAAGATCCTCTAGTAATTAAATAAAATAAACAATAAATTTGTACATAAAAAAATTAGTCATTTGCATGTCATATGTGATTTTTATACACACTCATTACGGCTGAGGTGTGAATCTAAGGTAACTTTTCCCAGAGGGCACATCCTGAACTCTGTGTTTTGGAAAAAGTTTGGCTGCCTCTTCTGGTGTAACACTTGGGACAACCATGCATTCTCCTCCTTGCTGCCAATTAGCTGGGGTTGCCACTTTTTTGGTAGCTGTTAACTGTAGGGAATCGATAACTCTCAGGATCTCATCAAAGTTACGGCCAGTAGTAGCTGGGTACAAAGCAGACAGCTTCAATTTCTTGTCAGGTCCAACGATGAAATAAGCTCTACATGTGAGTGGTAATC…
>EduN_6746
GGTCACCATCTAAAAACTACATCTCCAACATACAGTGACAGTAGAAGAAGAGCTCATTCCAATAGCTCAGATCCTGACTTAAGTGAACTCCAATCATCATCTGCAGCAAGGCAGTTAGACATGGAGAAAAAGACAAACAGTGGTATTGTCAGCAAACTTTTACAAAAATTACAAACATTTTCCAAAAGTCAGGAAGAAACATTAAGAGAAAGAGGACATAAAATAAAGAAAAAGTCAGAGTCCCAGAATTTGAACCCAGAGGAAGGAAGACGACCAAGACGAACGAGTGGAAGTGACCAGGATATGAGTCAGGATTCTAAAGGTGTACCACAAAGTGATAGTTCTTCTGGTACCCAGTCTGATGATCCACAGTCGGCC
>EduN_6762
CTCCCTTCTTTGTGCACTGGTGTTTTCTAAAAGTGATATATTTTCCTTCTGGGTGTACTTCAGCGATTGAGACTGGTCCTGTCGATGTTTTCTGGTATGTTGTCTTAGCTGATACTTCTCCCCTCATCATTTTCATGGAAGAGTGGGAATCGCCCTTAGTTTCGTATTCTGAGATCATTTCAGAAAGTTGGGCTGCTCCTCTACTTTGTGTGTTCATGGATTGTTCAATTACATTCCTCATGCCTACTCTATTAAACAGGTCACTGCTTTCTTCACTCTCCAATTAGTTTTCTGTAAGCGGCGATCTCAAGCTCAAGTGACTAGTTTAGCATCCATCAATGACTGTAACTCGACTAAGATTGCTTCC
>EduN_6787
ATTTTTGTTCTTCATTAACTTTTTGTTACGCAAAATAACCATTAATCGAGTCAATATTTAAAAATTAGCAGCTGCTGAACCACCGATACTGAACGTCACTCTACCATTTTCTCCAGAGTCCTTATCGGTTACTTTAAAGAGCTCAATAACACGTTCTATTTTTGAGAAATATCTGATAGTAATTGTAGTTGGAGCAGATTTGAAGATTGGAGCGTTGTCGTTGACATCTTTTATATTGATGGTAACAGACTGGTTTGAACTTAATGAAGGAGACCCATTATCTTGAGCTTTAACTGTAATCTGGTAGGATGATTGAGCTTCGTAGTCCAGGGTAGTTTTACATTTCAGTATACCCGATGAATCCATTGTAAAATGTTGCGTTCCACTTAACAATGAATA…
>EduN_6851
GTTATTACGAATTTGCATATTATAACCGTTTACTCTCCGCTATCTGATCACGGTTTAACTTCATGGATGTGTAATCCAGTGTGACCCTCATGTTTAGCAACACCTTCTTGATCATCACTGTTAAAACTGTGTAGGTGATCATGAGTTGGATCTGCAAGTACTATGACACAACACGCAACCTTAGGTCCAGCATTACCTCCCTTTAAACCTTATTCCGGCATCACCTCCCATTCCTAAGTCATCAGGTCCTTCATGAATCGCAATACTTCTACCAATCAGAGAATTTTCCCCATGAAGGCTGATCGTCTCATCTGTCATTTTATAGTCAATATTTCCATTCATATCACAATCAATATTACCAAGGTCGCCTACATGCCTTGAGTGAGCATCTTTTGCTCC…
>EduN_6869
GAAAAATGTTGCCTTTAAAATAGTAAAAGCTACTAATGGTGATGCCTGGCTAGAAGCACAAGGGAAGATGTATTCACCCAGTCAGATTGGGGCATTTGTCCTTACAAAAATGAGAGAAACTGACAGAAAATTATGTTGGACAGCCAGTTAAAAACGCTGTTGTTACTGTTCCGGCTTATTTCAATGATTCACAGAGACAGGCAACCAAAGAATGCTGGTCGAAATTTACTAGGTTTAAATAGTTTTACGTTGTGATAAATAGAACCTACAGCAGCAGCTCTAGCTTATGGAATGGACAAATACTGAAGATAAATTAATTGCTGTGTATGATTTAGGAGGTGGTACTTTCGATGTATCTGTATTAGAAATCCAGAAAGGAGTTTTTGAAGTAAGGTCAAC…
>EduN_6870
CAATCTTTAACACCTGAATGGAAAAAGCAGCTAAAGCACTCCAGGGTGTTGTCAAAGTAGGAGCCGTGAATGCAGATGACCATAGAGAACTTGGAGGAAGATTTAGTGTTCAGGGCTTCCCTACCATTAAAATATTCGGACTTAATAAGAATAAGCCTGAAGATTATCAAGGAGGCAGGACTGCTGATGCCATCGTTAACTCTGCCTTAAGCAAAGTACAATCAATGGTTAAAGACAGAATGGCAGGCAGGGGTGGAAGTGGTGGTTCACGCAGCGGTGGTGGCAGCAGTGGAGGTGGATCTCAGAAACCAGACCCAGGTGCAGTGATTGAATTGACAGACAGTAACTTGAAG
>EduN_6914
TTATCTTTCAACGTGGCAATGAATCCCTGGCACTTGTTGTTAAGGTTACGTAAAACCACTCTCACGTTTACACCTGTTCTTGTTTTAGTTGATTTAACTTCACCGAGATTGAATTCCACCTTATCTCCATATCTAGGAGCATTTTTCATTTCTAAAACATCTTTGATTGTGTAAGAAATTTTCTGAATTTTTTCATCAAAATCAAATACTATAATTCCAGTTTCAGCTTCCTTTATTTTACCTGGACTTTTATGGGCATTAGGTTCTTTATCAACAGTTCCAATGTATTTTTCTGGATGGATGACTAGAAATGATACACTTCCCTTAGATAAATATTTGATTCTGATAGCCATTAAGTTTGTTACCATTTGATGCTGAAGGATCCTGTGTTACTGTAAA…
>EduN_6924
TGATGACGAATGTTGGAATGGACAAGATCGTGCTAGGTATGAGGCTGAGGTCCAGAAAGATGGTGTAATTAACCAAATAAACAATCCAGAAGTGACAGTGGACGTGAACGAGGCCAATTACATCATAGAACAACAAAAAATAACAGCTGAAAATTATCACAGATAAATTACAAACAGCCTACAAAGGTGGTGATGTCACATATATATACACAGAAACAGTGACTGATCACAGTGGTGATTCCAGTGGTGACGATGATTTAGAAACAGGAAGTGGATTTAATCGGGAAACAGGAAGTGGCATAATTGAAGGAAGTGGGTCTGGTGATGGAGCAGACAGGGGAGACGATGAAGATTATCACAAAAATAAAAATCACTGGAATAAAAATAAACACGGACACG…
>EduN_6961
GTGGGAACAAAGGTCAAACACCATCGTCATGATGACCAAATTAGAGGAAAGGTCAAGGATAAAATGTGACCAGTACTGGCCCCATAGAGGTGGAGAAACTTATGGCATCATGCAGGTCTTGTTAGTGGATGTCACCGAACTCTCAACTTATACCATCAGAACGTTCCACGTCTCAAGGTATGGTTATCCAGAGAAACGTGAAGTGAGACAGTTCCAGTTCACAGCATGGCCTGACCATGGTGTCCCTGATCCACCCCACCCCCATTGTTGATGTTTATGAAGCGTGTAAAAGCCTGTAATCCTCAGGATGCTGGACCTATGATAGTACATTGCAGTGCTGGAGTTGGCAGGACTGGAGCATTCATAGTAATAGACGCCATGTTGGAACGTGTCAAACAT…
>EduN_7004
GCATTCAATACAAAATCACTGGATTCCACTACTCGGCCTATACCTGATACCCGTCATGTTAAGGTAGTCCGATTTGCTAAACCAGTATCAACACTAGAAGCTTCACACACATATTTTCCACTGTTACTAAAATGTAGTCTATCAACATACAAAGTGTAAAAACATCCTGTCCTGTTTTGTGTTGAAAATGTCTTTACAGTAGTATCACTGATCATTACTTCTTCATCCGCTGACAACTGTAAGTAGTTTCCAGCAACCCCATAAAAAGCCCATGTCATGTTTTGAGGGTATGCAAATCCCTTAACTGCACAAATAACCTTGAATTCTGAATATAGATCACTATTCAATGTGCGAGAGTCTGGATAAATCTTTGATATAGTCAATGGTTCAACACCTGAG…
>EduN_7008
ATCAATTAGAGTTATGCCTGACAATGCTACAGAATTTACTGTTTCCAATCTGTTACCCAGTACTGCCTATGTTTTCCAAGTTTGTGGATATAACGAGCTAGGAGAAGGAGACTTGTCAGATTCTATCACAATTACAACTAATGGTTATACATTCCCATTTATTAAGGAAACACCAGTAGTTTTCTGGTGACAACAAAGAATTAGTCTTAAATCTGGATGTGAACAGTACCTTCTGTGTAAAGGTCAAGGTCAGCACCAATGGTGGACAGTCGTGGCAAACCTTTACCAATAATGACCTTGAATGTTTTGATGCCAATGTTGCTAAGATGATCGTGA
>EduN_7020
AGGTAGGACGCGATGACGTCAGAGTTGGAATGATGACATTCAGCAGCGACCCGAGAATGTTATTCCAGTTGAATGACTTACAAAACAAAGAAACAGATTGCTTCGTTACTGAAATATATTCCATGGCGTGGTGGGGACACATATTTAGACAAAGCACTGAAACTTCTTATGTCAGATGGTCTTGTGGCATCACAAGGGAGCCGAAACAATGTGCCACAAATAACAATTGTTATCACTGATGGGCAATCAACAAATCCAAGAGAAACAGAGAAGATGATGGTAGAATTACGCAGGATGAACTTCATTGTGTTTGCTATAGGTGTTGGCCCAAACCGAGATCCCACAGAAC
>EduN_7022
GTCGTTTGAAAGGGTTTTTATCACCATCTCTATCTATTGATTTCATTAAATATAGTTGTCCTGTCTCATTCAGATGGAAGTGATCCTGCATTTCTCCTCCAATAATATAATAAAATATCTGGCTATTGTTGGCATCACTGTCCTTGTCCACGGCTACATCAACACTACCAATTAATGCCCCTGTGCTCTCCTCTGGCACACTGCCAACCATAGTACGGCTGATACTGGACGTCTCGTGGAAATTCTGGGTCTTTTATCGTTGATATCAATCAGGCTG
>EduN_7031
AAAACAATACAGATCAAGGTCATGTAACAATCCAGTTCCATCGAATGGAGGTCAAGATTGTCCTGGTAGTTCAGAGGAGTCTAAAGATTGTGTAAATGGTGAATGTTGTGCGCCAAGAGTATTTGACATGGTTTTCTTGGTTGATATTACATTTTCTTCATGGTACATTAGTAATATTAAGACCTTCGTAAAAAATGTAGCTAACGTAACAGCAATTGGACCTTCCAGAACAAGGATATCGTTGGCAACATTAGGTTCCACTGTAAAACCTGGAGTTTGATTTTGTAACTTACACATCATATTCAGACGTATCTGAAGCTCTTTCGAGTAGTATATCAAGACAATATGGAACACCAAATATTAAAGATGCCTTAGAGTATGCAAGGGGTACAATGTTCA…
>EduN_7034
GTACTCCATGATCAGCCGATTTGGTGTGTTGTGCTTCACGTTATTTACACAATATTGTGTTGTGAGTAATTTTGCCTGGATGTTCTGTGAAGGTGTTTATCTTCACACTATAATGGTGAAAACGTTTATAACGGGTAAATGGCTCATTATTGTGTGTACCGTTATAGGCTGGGTGTGTCCGTTTGTGTTAGTTGGAGTTTATACAGCAGTGAGAGCCTCAAGCAAAGATGATAATATACTCTGTTGGCATCAAGAAAGTACATTACAGTGGATAATGTATGCTCCAGTTGTAGCCTCTTATTTTTTTGAATTTGTATTTTTCTGTGCAATATAGTGAGATTGTTGATAAACAAAATTACGACAGATACCAGAAGCAGGACAGACAAGAAA
>EduN_7143
AAATGTTTTATTTGAAAGTCCAAACAAAGTAGTTGTTACAGTTGCGAGTCCAACACCTGGTATGTACACTTTGTTCAGAACAGGAAATAACCAGTGGAGTGTTAATATAACTGCTCAGTCAGCAATAGATTTTGATCATACCATTACAGAAGAAGCCGATGACGGATACTTGTACAAACTTGTAAGGAAATCCTATCATAGGCCAAACTTATACAATCTTTCTAACAGTATATAACTTACCAGAGAATGCAACAGTCACAACAATGCAACTCACAGGAGGTTCAGGAAGTGAAAACTATTTTAAATTTAACACACATGTCATCAGTATTTTGATT
>EduN_7155
GAAATGTCATAACAGCTGTAAAGACGTCATATGTCCAAAAGAGAAAAAGTGTCGGATGAAGAAAGGAATTCCAAAATGTGTATGCAAACCAAAATGCAGTAGTATTGAAAGAAGTAAAGGACCCGTATGTGGGACTGATATGACAAAATACAAAAGTCGCTGTCACCTTTTAAGACACAACTGTCGATATAATACAGATATAAAAGTTGATTATTATGGAAAGTGACAAAGATTCGTGTAAATTCGTACAAATGTCCGGCAGGTACGTTTTTGTGTTGAAGATCAGAACGGTCTGCCTCATTGTATTATTTGCAGCACCGACTGCTCATTAGCACGCAAAGAACCCGTATGTGGTAATAACAAACAGACATATGATAGTGCCTGTCATCTACGGGCAGA…
>EduN_7190
CTAAATGGAATAAAATATCCAGTACACGCAAAAACGTTTCCTATAAACAACATGAAAAACGAGAATTTCAACATTAATGAAAAGTCTAACATTTCCTTGAGAATATCAGTCACAGTTTTGGGCAGGCATGTACATTTGTCCCAAAGTGAAGATCTCTCTGGTTCGTCTATTCCCGGAATAGATGTTATACTGGCTACATAACTATGGACATTAGGTTGAGATCTAAATTGTGGTATTCTATCTATACTTCCACTGTAGAAAATATCTTTCTTGTACATTGGTACTTGCAAAGTCTATTCTGTGTTGCATCACTGAGGGTTGCGAATCAGCTCTACTTCGGGTTGTCCTAGGAATAATTTCTTTTATTATCAAAGGCTGGTATGTCTCTTTCATATTTGA…
>EduN_7194
GTTCTATTCAGATAAGCATGAAATTCCTCAGGAATGGGACTGCTTGCGGCACTATTACATATCGATGGTGGCATGCTGTCTCCACGAATGGCAGCACGCTTTTCTAACTTGTCACTCAACTTGTTCACCATTTTGTTCATATAGTCTCTATCTAAAGTATTCCGTCTACGTATTTCCTTCATCTATCGTATGTAATCTGGGTCGTGTGACTTGTTTCCCGGTCTAATGTGTGACATCGTCTACGTGGCATGTCTGGAACCAGACCATAATATCCAGCTATTTTCTTCTTTATAAAATGTTCCGTAAGGTT
>EduN_7212
GTTTCTACGTCTATTGCTTCAATTTCAAGTTCTGTAAAACCGAAATAAAAGTTGACCTTGACATCTCGGTACATCTCACTAGGATTTGGTATCGGCACTTTAATAGTACCCAAGTAAGACGACTCGTCATCATCTGTGTATCTTGGATTTTTACTTGTTGAAATGTAAATTGGCAAATAATGCGACTTTTGTATTTTTTTCGGTTGTAGTGTATGTTTCTGTAATAGCTGTTCCAATGGGAACTGAAGTTTCTGCCGCCATAAATGTATCGAATGCACCTCGACACAAAGCCTCTCCATCTACAATGACTCGTCTGTCTGAGGAATGAAGTCTTGGGTCGTAATCCTTAGACACTTCTACACCATATGTATATCGAACAACCCTTGACGCAATAAAACT…
>EduN_7233
GTTTTATTTTCATCTCTATAGATTTTAATGAGTATTTATATCCTTTCCAGTGGTACCAGTTTACGCCTACAGCTAGAGCCTCGTGTTCACCTTTTAGGTATTCACCATTTGGATTGGCGTAATGACAGTTATTGTACCAAAATCCTCCTTTAAATGACTTTGCGCATGACCCTGGAGCTCCATCATTGTCGACATCATGCGTACGAAAATTTCATCCCGTTTGCAACCTGCATAGAATTACCTGCATCTCCTGAATACCCAACAACAGTCGAGGGGGTTAATTACTGGAGATATCACCAACTACGAAAGTATTTTGTATTTGGCGTTATTTACTTTCTCCCTACAAAATCAGACATATCTACACGTAGCT
>EduN_7372
TCAATTTGATATTGATGTACAAGCATCAACGTGTTCACCATACAATATTCCAACCCCACAGCATGGTAGTAAATCTTGTACTCCAAAGACAGGAGACACTGGCTATGAATGCAATATAACATGTAGTTCAGGGTATTATATGTATGACTATCCCGACCAGAGTCTAGTTACCATGGAATGTGATAATGGTGGTGGCTGGAATCGACCAATCATATCTGCTTGTACACAAGCAAGTGTCAGAGCACAATATTCTGAAATCTATACAGTTCAATACAATGCACCAAGTAATATACCAAGTAGCTGTAAAGATCAATACCGTGGCAAGATTGCAGGACAGATTACTGCATCACAAACTAAATTACAATCGCTGTGCACTACTGCTGTTGACTCGAACATGAT…
>EduN_7383
TTTATATTGACCGTTTAGGCTAGAATGATAACAGCCTCCATACCACCAACTTCCCGTATATGCCACTGCACAGTTTCCTCTGTTGTCATCCTTTGTACTGAATGTCCTACCGTTATGGTAAGCCAGACTATCACCTGCGGTTCCACTGTAACCACTGACGGTCAATTTGTATTTTTTTTGATGAGTTACCAATGGAAAAGTGTTTATATTTAGCATATGCAGTGTTTCCTTTGAAATCTTCTAAATCAATACGCAGCACATATTTTCCACCTGTTGTTAAACGATGTATCTTGTCGTTT
>EduN_7419
AAACAATTGACAATGAATACAGTTCAAGGAATACACCGGCCTTTGTTTCCTTCAATGAAAAGAACAGAAGTATTGGTGTCTCGGCCAAGAATCAATGTATTACAAATCTGAAAAATACAGTATCTGTTTTCAAGAGGTTTATTGGAAGAAAGTTCACAGACCCCTTTGTACAACAGGAGCTCACCGATTTTCCCAAACCTTATAAGGTGGAACAGGGAAAGAATGGAGAAATATTAATCAAGGTTCAGTATCTTGAAGGTGAGCAGCAGTTCACTCCAGAGCAGATGATGGCAGCTCTATTAACAAAGTTAAAGCAGATATCAGAAGCTGGACTGAAGACTAAAGTCGTAGATGTGGTGGTATCTGTACCCACATTTTTCACAGATATAGAAAAGAAGA…
>EduN_7466
GGTAACTCTGGATTTTTCTTCGCCGCGATTTGGCAGCTTTAAATATACAGAGAGCTAGAGATCATGGTCTTCCTGGATATAACGACATCCGACAGGCTTATGGATTACCCCGTCGTGGACTGGACGGGAATCAACAACTTAACTGTTAATAGCGGAAAAATAAACCAAAAGCCTAATCGATGCAATTGAAAGAGTACGAAGTTTATATGGAAACAGTTCAGCACCTGATGAACTTGATCTCTTTGTTGGGGGAATGTTAGAAACAACATTTGATGGACCAGGGCCATTGTTTAGAAACATACTTCTTGAACAGTTCTTACGTATTCGACATGGGGATAGGTTTTGGTATGAAAATACAGATAGAAAGATTTCGACAGTTTGATGACGCAACGATTGCAG…
>EduN_7492
GGAGAGCGACAGATCGAAAGGAGTTTGAAAAGGCAGTCAATGAGTTACGGCAAACAAATTATTTAGTATTTGCAACAGGTGTTGGACCTAAACGTGATCCTGTTGAGTTGAAGAAAATTGCGTCTGACTCATCACGTGTTTTTGAAGTAGAAAATGTACAAAGTTTGCAAGCAATTAGACAGGAATTGGTAGTCAAGTTGTGCGAACAAGGTGACCAGCCAGCACCACCCGTAGTGACGTGTGAAGGGGCACAGGCAGACGTTATCTTTGTTGCAGATAGTTCTAGGAGTATTGGATCAGCAGCATTCAACGAACTGAAAAAGTTTGCTGTTGATGTGGTGAAGAGGTTCACAGTCAGTCCAAGTGATATACAAGTTGGCCTCATTATATTTGGAAACG…
>EduN_7498
AGTCATTGTCTTCATCATCACTATCAAATGCCACAGGTGGAGGAGGCCCACCAGTCCCTGAAGACACTATCTTATTTTTCTTAGCACTAGGTGTACGAGTTGCTGGAGTCTTTTTCTTTGTACTTTTTGGTTCTAATGGCAATTTTTTCGTAGCTTTCACTTTCGGTGTTTTAACATCGTTCACAGATGGTGGTACAATAGTAGCATTTGTACTTGATGCCACCAAAGCAGGTGTCTCTATCACCTTAACTTTCTCAATTTTTACCTTCTTTTTTTCTTCTTTATCTCACTCTTTTCCTTTTCTGTTTTAATTTTGCATATGTTCTTCTGTCAATTTACCTAAATCATCTTGTAACTGAACAATGCTGGTGGTGTAAAATTTGTGGTGAATGTTGGTGA…
>EduN_7694
AAAACAAATGGACGCATTAACATATACGAGAACACTTTATCTTTCCATAAAAGGGGGCCGCAGTGATGCTGGTAAAAGTTGTTATTGTGATAGAAAAGCGGCCCTTCGACTAATACACCTCTAACTATTACCAAAGCAAACGATCTCAGAAACATCATATGGAGCAGAAGTGTTCGCTATAGGCATAGGCTCAGATTTTATACTAAAAAAAATGACGAATTGCAGGGAATCGACAAACGATCCTGACTCTTATTATGTTGAATATATTGGTGGATTTATAAATCTTTGTGGTATTGTGCCATCCATTTTACCTAAGATTGATAATGAAACAACAGCTACAATGTTGGATGGTTGTGATGA
>EduN_7698
GGGAACTAATGTAGGTACATTAAATATATACATGGAGGGACAAAATATAGGAAAGTCTCAAATATGGAGACGATCTGGGCAGCAGGGCAATGATTGGATAAAGGGAGAAGTCGACGTACTGGATACGAATGGTCGTAAGATTTCCATTGAAGCTGTTCGTGGATCTGACTTTTCAAGCGATATCGCAATCGATGATATTTCACTTACTCCAGGGAATTGCGTTACTAACACAGTTGCTCCAACTATAACCCAGCCGACTACAACTACATCTCAGCCAAACAGGTGGCAGGACAAACATGTTCATTTGGAGGTTGATGCTTCATTGTTTTTTTGGTTGAAGCTTACTGATGACGTATTTTGATTGGACT
>EduN_7711
GGGACTGCATGAAGCAAAAGTAGAAGTTATGGAGTTTATGGACTATTTGAAAGATCCAAAAAGATACAAGGCATTGGGAGCTAAACTTCCTAAGGGAGCATTATTGCTTGGACCACCAGGTTGTGGGAAAACATTGTTAGCTAAAGCATTGGCTTCTGAAGCTGGAGTACCTTTCTTAGCAATGGCAGGGTCAGAATTTGTGGAAATGATTGGAGGGCTTGGTGCATCAAGTAGTTCGAGTATTTGGTTCAAGAAGCCAGGAAATCAGCCCCATGTTGTATATACATAGATGAAATAGATGCTATTGGACGTAAAAGAGGAGGATCGTCTGAAGGAGGCAACTCTGAGGAAGAGAATACAAC
>EduN_7738
ATCAGATATCATTTCTGGTATGGACTGAATGCTTGTTATATACATCTCTGGATTGGACTTGTATTGTGGAATGTTCATTAAACTTCCGCTATAAAATATATCTTTCCTATTGAAAACACTTGAACCAGTTGTTCTCTGGACAGGTGTAAAAGAATGTTGACGATTAAATGATGGAACAACAATGGCTGATAATGGTGATGATGGTTCTGAATAATTCCCATTAACTGTATGAATAGCTCCATCACTTCTGAACATATTTACATTTATTTGTTTCTGTCAACCTTAATTGATCGAGTACATGATCTTTAATCGGTTTTCTTCTCCATTC
>EduN_7766
TAGAACCACCAACAAGAACTACTTCGTCAATATCAGATTTCTTCATGTTGGCGTCATCTAATACTTTCTGTACTGGTTTCATGGTAGATTTGAATAAATCCATATTTAATTCTTCAAACTTGGCCCTAGAGAGTGTTTCTGAGAAATCATTTCCTTCAAATAATGATTCAATTTCTACTCTTGTTTGATGTGCAGACGACAGGGCTCTTTTAGCTTTTTCGAC
>EduN_7769
GAAGTGACAGTGAAACGTATTTTGTTGTACAAGTCAGAATCCCGGTCTTCTGCTTCTAAATGTATTACATCATCCTGCGTCGGGAACTTTAAAACAGCTGTTGTTATGGTATCTGTATTGTTAAAATAAGGAGCTTGGTCATTGATATCTAGTACTGTGACCCTCAAATAAAGAATACTGGTCTGTATTTACATAGTTCCAGTTAACATTCTCTATCTGTCTCTTCCTACGACCACCACTATAATATGGCTCAGCTTTGATACAGAGTATAAAATGGTCAATAATTGTTGGCCAATTCCTCTCACGGTCAATTGTGTTGTTGTATGTGGTCACCTGACCTGACAACTCATCAACATGGAAATACAAAGATGGATTTCGATAACAATGGGTGAAGTTAGG…
>EduN_7774
GTCAAGATCTAATGCCCATGTCATACCACCGCCTAACCCATTGTCTATAACGTATTTTGCCTTAATCTCAATACTTTTAGCATTGTCGTAGCCAACCCATTGGTCACCTTTGTAGGCATATGGGACTTTTTGATCGTCCAACCACCCTTCTGTCCAGCTCTTATTTCTTATATTAGAACAAATCTCGTAATATGATAAGAATCCATTTTCTTTTGTGTATCTTCCTGCTGTACCCTGTCCCTTGGTGGGAGCATTCAGTCCTGTCTCTGCTGTGTTACGTAACCTATAAGATCTTCCATAAAATGCCATACCCAGTATCTAGTTTTTGTTAGGTGTACCTCCATTCAACCACTATTTTTATG
>EduN_7782
GTGTATTATAATTTTCCGACTCTTATTGAAGTGATTTGTCCAATTGACGTAACTAGCTTTCCGTTTGACACTCAAGTTTGTGCATTATTATTCGGCTCATGGGTGTACCATGGAAATCAACTGGATATGCTAGCACGTGACAACCCAAGTGATTTATCATCTATGAAAACAAACGTAGAATGGGTCATTCAAAAAATTGTAGTTGAAAGGCACGAGGTAATATACGGATGCTGTCCGGATCCGTATCCAGATGTTACATTTTATATTCACGTAGAACGTAAACCTGCATATTATGTAACGAATATAATAATTCCGTCTATCATGATAACATCATTGGGTATTCTCTGCTATTTCCTCCCTG
>EduN_7788
GTTAACGCAGAAAGTTGAAACGTGCATCCACCTTTTCACCAGTGGATTTTACCACAGCTTCAACAGCAATATCGGTTCCTCCGAACCTCATCCCTACTACGACTTCTCGTTCACATCCTCCCCGAATGTCGGATACATCAACCTCAAGATCGCCGAGGTAGGAACATTCCGTCTCATCTATATATTCTGGATCCACTGCACGAGATGCATAAATAGGAAGGCGTATTCTCCGCTGGTCACCTTTTAATGGATTATAAGTTCTCTGATCAGTGACCTCCCCTACCTCTATCGGCTGACCTCTTTCGACATGCTTGCCGAATCTATCACGACAATACATGATATCATTGACTAATTTGTTTCTTGTCCTCTGGGTCTGTATGGGGACGGAAACGTTTGTTT…
>EduN_7799
CTTTATCCTTGCCTTAGATGGAGATGTGGATTTTACACCTAAAGCTGTCAGACTACTCGTGGATAGAATGCAGAAAAATGAAGAACTAGGTGCTGCATGTGGACGTATTCATCCTATAGGAAAAGGCCCCATGGTATGGTACCAAAAGTTTGAGTATGCTGTTGCTCATTGGTTACAGAAATCAACAGAGCATGTCCTTGGCTGTGTGCTGTGTAGTCCTGGATGCTTTAGTTTGTTTCGTGGTTCTGCTCTGATGGATGACAATATCATGAGAAAGTATACCATACAAACCAACAGAGGCTTCACATCATCTTATGTATGATCAAGGTGAAGACAGATGGCTTTGTACTTTACTGTTACAACGAGGGATATAGAGTAGATTA
>EduN_7805
CTCGACTATCAAATAGACGACAATGGGGACGAAAACGTGTATAATAATGTTAACAGTAAATATGATGTTTCCCTGTACAATATACTGATTGAAGATCTGAAAGATGCTATAAATGATAAACAGAAAGATGAAGGTTTCAAAAAAGAAGTATGAGATGTTACCTTAGAGGTCTTGTGTATGCTCATGTCGAAAGGTTCAAAAGAAGAAAATAAAGTAAAAAATCGTTTTCTCTCAACATGGCCGTATGACCACTCACGAGTTATTCTGAGGGGAAACACTAAGAATGATTATATAAATGCTAGTTACATTGATAACTTTAGAAAATAAAAAGGCATACATAGCAGCACAAGGTTTGTAAAGAATTATTCTATTTTTTTATTATTGTTCTTTGTTATTAAT…
>EduN_7839
GTAAAAGTTGGGGGCGAACTTTTTCAGATTTTCAAGGGTAAGCGAGGAAAAGATATTAGTGAAGAACTCAAAGGCAAACTGAAAGGTACGGTTAAAATAGTAGGAGACAAATTGCGATTTGACGTTGCAATCTTCAAGAGATTTTTCCAGGACTGTGTAAAAAAAAATTGTCAATCACATTAATGAGACTTTTTTGAAAAGAGGATGCGCATGGCCATCTGCGATGATATTAGTTGGTGGTATTTTCAGATTCTCCGGTTATCCGAGAAGCAATTGTCGATGTCTTTTCCCGTTATACAAAAATGTTGTGTCGCCTGTAGCGACTTCATTGGTCCGTTTTGAAAGGATCAGTTATATTTGGTCATGAACCAGCCATTGTTACTGGTAGAGTTTGTCGCG…
>EduN_7843
AGGGTACCTCTTTAACTTCAATTCTTCTCTTTCCACTAAAGTGTAAAAGCCTGGGTCTATATTCCTCTGGTAAAACATGTTTAAAGCCAGTTTCAGCTCCTCCTTGCATAGTTGTGATTGATTTAAAGTATGATTTAAACAGAGGAGATTCATGTCCCATAACTTCTCTGTGTTGAACAGCCGCGTCGTCTAAGAAAGTGTCCAACTCAACAGTTTTGTAGGCTGCTGTTCCATATTCATCCTGTGTACTATGTTTGCCTATCCAGAAGTGGAGATCATAACACAGTTCCTCAGAATCTTCATTCTTCTTGTATG
>EduN_7875
AACCACATTCTGCTCAGGATGACTGTATTCCGTGTCCATATACTCAGACAACAGCCAGAATTGGGGCTATTGATGTTTCAGAATGTGAAGATGCATGTGAACCTGGTACCTGGTCTTTGACTGGTATCCCACCATGTGTAGAATGTGATGTTGGTTATTACGAGAGCAACTATGGTTCTACAGTCTAGTAAACAATGTCCAAGGAAATCGTATTACATTGATGGAAGAAAAGTGACAATGTATCG
>EduN_7961
AAAACTCTTAAATGGATGCACGAAACAGAACAAGAAAAGGCAACTAAAATTGTATCCAAACGTGTGGATGACTTCAGAGAAAGATCACAACCCATACTTGGACAAGTGCATGATCCAATTAAAGATACTCTCAAAGTTGGACCTGATCACACCTATGGTATATTAGCCAAACCTGATGAGTATGGCGCTGGTGACCTAATGCATGGTCGTGCTCCATCTAATTACC
>EduN_7990
ATCGCCTATTATCAGAAGGGTGTTGTAACCAAGAAACAATTCCAAGTGTTTCATCTATAAATCGGGTACTTCGCAATCTTGCTACTGAAAATACAGAAATTTATAGGGACAAAGCGCTATGTATGACAAATTAGGACTTATAAATGGACAAGCATGGCATCGGCCTAATCCGTGGTATGCTTCTAATATGCATGGCATGCCGGGAATACATACGCCATCAGTTTATCCATCACATCAGAGTGCACCCAGCCCTCACGGAAAAGAAAAATATCGATGGCGTCCATTCGAGTTCAGAAAGCAATAATAGTGAAGGACAGAACGGGGAAGCCGATGAACAATTACGCATGCGTCTTAAAAGAAAATTGCAACGCAACAGAACGTCGTTTACAGCCACGCAAA…
>EduN_8080
CTTCATTAGCACCCATTATAGTTTATGTAAAAATAGCTTCACCAAAGGTATTACAGCGATTAATCAAATCTCGTGGGAAAGCCCAGAGTCGTAACATGAATGTTCAGCTGGTAGCTGCAGATAAGTTAAACCAGTGTAGTTCTGACATGTTTGATGTGATTCTGGATAGAAAAACCAATTAGAAGATGCATGTGAACTATTTAGCTAGAATTATTTAGAAGTTTATTATCGCGCTGCTAATCCTCCTGATCTGACACCTCATCATACGCCACGTCATCACGGGCACACGCCCTCACTCGCCGACGTCTCTCAGCCGGCATAATACAATGCCTCGCCCCCCATGGTTC
>EduN_8119
GAAAATCAGTATTCCGAATGAACTATTAAGAGCTTCGGAACCAACAATATCCACTAATATAACGGACTTTTGAGAAGTGTATGTTCCTATAAGCAATCCAAATATGGCGGCAACAACACAAAATTCAACAAACGTCACAGTAAATGGAAGGGAAAAAATCACAAGCGCTAACATGAACATAACAGTATTGTATAATAGTTTTCGGAAATTTCTCAGACGTTTTATTTCTAATATAAAACCTGAAGCTATTCGTCCAATAGTGTCAAAAATACCAGCAACTGACATTACACATGCCCCTTGTATACCAGACAGACCTCTTGATTTTACAAGAGGTGGAATAAATAGTTAGCATAGAGTTAAACGATAAAGCTAGAAAGCTTATTCCGACACAGAACATTA…
>EduN_8120
GTCCCTCCCCTGCCCAGCATGTCAGACGCGCCACTGCCCTCCGGTTGGGACGAGAGGTCGTCCAGGTCCACAGGTCAATCTTACTACGTGAACCAATTCACCAAGCAGTCTCAATGGGACCGGCCTACCAAACCTGCTGAGAAGGGAGACTCGGAGAAGGTGCAGGCCTCGCATCTCTTGGTAAAGCACAGGGACTCCCGGCGTCCCGCCTCCTGGCGCGAGGAGAACATCCACCCGCACCGAAGGACGAAGCCCTCGAGATCCTGAAGGCTACCGCGAGCAGATCGTGAAGGCGAGGAGAAGTTCGAGGACCTGGCTAAGAAGTCTCTGACTGCTCCTCAGCGAAAGAACGG
>EduN_8153
ACCAATTCGGATCATTAGCACTTCTAGTTTATCTGTTTTAACTCCATCGTTTCGAACTTGTTTTCGGATTCTAAATAAAGCTACAAAACCAGCGACTAGGAAAGTTATTCCAATGAAGAGGTAGACTAGTAAAGGGGCAATAACAAACCCCAATAAAGTTCGGGTATTCTGATTCCCCACATAACAAACCCCAGTCAATTCATCAGCGTCTACATCACGCATCACTAAAATAACAATTGTTTTAATGGCCGGAATGGCCCAAGCCACTAAATGAAAGTAACTACTGTGAATTTGGATGGCCTCGTGGCCCCACTTTAATCCTGCTGCCAGGAACCAA
>EduN_8175
TTGTCAAACAACTTAACCATATCTGATCGTATTTGGATCTATATTTTTGTTCGCTTTCGTAACTAGGTGTGGTTAATACAAGACGACAATAATGTCCGGACTAAGGAAAGCAAAGAAATATGACTGGAAAGATTCTAACATGGCCTTATTTGGATCAGATACGGAAAAGAATGTCAAAAAGGAATCCGCTTTAACTGAACCAGCCTGGAAAAATGCGGGTAAAGACGTTGGACTTCAGATCTGGAGGATAGTTAAATTTAAAGTCACCAACTGGGCTAAGGATGAATACGGTAGCTTTTATAATGGAGACTCGTATATCATACTTAATACTTATAAAAACAAAGATTCAGATAAACTCTTATATGATGTCCTATTTTTGGATTGGGAAATAC
>EduN_8180
GGCCAATACCACAACGAGAAGAATGTTACTTACAGCCCTGCCCACCAAGCATTTTCAATTGGCGTGTTGGCCCTTGGAGTGATTGTTCTACTTCGTGCAATGGCGGTTATTCATGGCGGGCTGTTATATGTATAGAAATGTTTGCTAATGCCACCGAGATAGAAGTTGAGGGAACAATGTGTGGACATCCGAAGCCATCCAACAGAAAGTCATGTAATACCCAAGTCTGTCCAACCTGGTATGCTGGGGAATGGTCACCTTGTAGTGGAAGTTGTGGAGTCGGGTACCAGAGAAGAGAGGTACAATGTCGACATACAGGCGAACAATTCTGTGTATTTTTTCTTAGT
>EduN_8221
CTTTTCTTACATGCTGTAATGGTAACCTTTTCATTCTCATTGGCGACTTTGTATCTCTTCTTTAACCTTCTCAAGTCTCCTCTCAATTCCTTGATCTTCTTCTGTCTCCGGTTACTATGGCCTTCTTTTGTTGGTTGTTTCCCTTGTGGTACCACTCCAAATCTATCCTTTCCTACACTGTAAATAATGGACGTCATTTGTGTTATCTTTCTGTCTACACTGCCTGCTAATGTTGCCTCTAAGATGTTTTCCAAATCTTCGTCAAGAGCTTTCCAAGCTGCTTTGTCTGCATTCGTTGGCCATTTGATCTTCTCTTTGCGTGGCTCATTCTCTTCTC

## Sheet: GalT.fasta
]
GAAGAAGCATATATCGGGAAATTTTGTGTTGCTGCGTCAGTGAACGTACGGGCAAACTAACTCGAATCTAAACTTTTACCATCATTTAAATATTTTTATTTGAAAACATCAAGAAACATCAAAATGGCACAGAGTCAACCACGACAGAACTTCCACATCGAGAGCGAAGCAGGAATCAATCGCCAAATCAACATGGAGTTGTATGCCAGTTACTGTTACCAGTCGATGTCATATTACTTTGACCGTGATGATGTGGCATTGCCAGGATTCAGCAAGTTCTTCAAGAAATCTTCAGATGAAGAACGTGAACATGCAGAAAAGTTCATGAAATATCAGAACAAGAGAGGTGGTAGAATTGTTCTCCAGGACATCAAGAAACCTGATCGCGATGAATGGGGA…
>GalT_11
ATTTTCGTTGCCAGACGACGGGGCTTCCGACACTTTGGCACACGCCAAGAAAAAAACATATGAAAACTACTCTAGGCGGTGGATCACTCGGCTCGTGCGTCGATGAAGAGCGCAGCCAGCTGCGTGAATTAATGTGAATTGCAGGACACATTGAACATCGACATCTTGAACGCACATTGCGGCTTTGGGTCACTCCCGGAGCCACGCCTGTCTGAGGGTCGGTGAAACATCAATCGCACCAAACGGGTTCACGCCCGCTTTGACTGCGCCTTGGGCTTTTGTCGCAGCGGACCGTTTTCTACGGTACGCTTCGTCGCCTTAAATGCAGACCCATGTCGTCTCGCTTTGCCTTTCGGTACTTGTATTCTTAATTTCTCCGCCGCCGTACGGCTGTGGAGG…
>GalT_12
CTACTCCAGGTACTACAGCCACTGTTGGTACATCACAGGCAACACCTTCTCCAGTTACTACCCCAAGCACTGTTGCAACACCTTCAGTAACAACAGCAGTTACAACAACTGCACCAGCAGAGATTTGTGAAAATCCAACTGATATTGACTTCAGCAAACAGGACAGTAAAGACCTTGAAATCATAACTACTAATAACAAGCCAGGAGAGGAGGCGACAAACTCTCTCACAGGATCCTCAAAATCATGGACACCAAGTACAGGTGGAAGCGGAATTGAATACATAATAAATGGACGAAATAACACGGTCGAATTTGTGGATGGTTCTTTTGAAACTGTAAACATCGCAGAGATAACCATATCCTTACTCGATGAAAATAAGAATGTTATTACCAGCGAAA…
>GalT_26
AATGAGGGAAATCGTACACATTCAGGCTGGACAGTGTGGAAACCAGATTGGTGCTAAATTCTGGGAAGTCATCTCAGACGAACACGGAATTGACCCCACAGGAACATACCATGGTGATTCAGATCTGCAATTAGAAAGAATAAATGTATACTACAATGAAGCTACAGGAGGCAAATATGTACCACGTGCAATTTTGGTCGATCTTGAGCCAGGAACTATGGACTCTGTCAGATCTGGTCCTTTTGGACAAATCTTTAGACCAGACAATTTTGTGTTCGGACAATCAGGTGCAGGCAACAACTGGGCTAAGGGACATTATACAGAAGGTGCCGAATTAGTAGATTCAGTATTAGATGTTGTGAGGAAAGAAGCTGAGAGTTGTGACTGTCTTCAGGGATT…
>GalT_46
GCATTGGTATATAGTACTATTGTCCCAGAATATTTCGCTCCATCTGATAATTCTGTCGTTGTAAAAAGTAGAATATCAAATTTCAAACACCCTAGAAATAGTTCCAGGACTGACCTTGCCCTTGCTTATATGAGACAAAATCTTCTCAAAACTTCACGTACTCGAGTAGGTGTCATTATCACTGATGGAGATTCGAAATACCCACCACTTACGAAAACACAAGCTCTTCAAGCTAGAACTGAAGGGATAACTCTTGTTGCAATAGGAATTGATATCAAAAAGAGCGATGAACCTGAACTTGAGGCAATAGCCGGTGACAAAAGCCGAGTGAAAATCATTGATAATTACAGTCAACTGAAAAACAAGACGATTCTTGCTGAGATAGCAGCTTCACTTTGC…
>GalT_47
GCATTGGTATATAGTACTGCTATCCCAGATTATTTCAAGCCATCTGAAAATTCTGGGGTTGTAAAAAGTAGAATATCGAATTTCAAACACCCTAGAAATACCTCCAGGACAGACCTTGCTCTTGCTTATATGAGACAGAATCTTCTCAGAACTCCACGTACTCGAGTAGGTGTTATTATCACGGATGGAGAATCGAAAAACCCAATTGAAACAAAAGCAGAAGCTCTTAAAGCAAGACAGGATAATATAACTCTTATTGCAATAGGAATTAACATCAGACCGAGTGACCAACATGAAATTGATGCAATAGCAGGAAACAAAACCTGGGTAAAGAATGTTGATAATTACAGTCAACTGGCAAACAAGACGGTTCTTGCTGAAATAGCAGAATTAATTTGC…
>GalT_58
ATCCACATCTGTTGGAAGGTTGAGAGTGAAGCTAAGATGGAACCACCGATCCATACGGAATATTTCCTTTCTGGTGGAGCAATAATCTTGATTTTCATTGTTGATGGAGCAAGTGCTGTGATTTCTTTCTGCATACGGTCGGCAATACCTGGGTACATGGTTGAACCACCAGATAATACGGTATTAGCGTACAAGTCTTTACGGATATCAACATCACATTTCATGATACTGTTGTATGTTGTTTCATGTAAACCTGATGATTCCATTCCCAAGAAAGATGGTTGTAACATGGCCTCTGGACACCTGAATCTTTCATTACCGATAGTGATAACCTGTCCGTCAGGTAATTCGTAGCTTTTTTCTAATGATGATGATGATGCAGCTGTGGACATTTCTTGT…
>GalT_59
ATTTTTACAAGTCTTTTTCACATTCAACTCTCCACATTCTTGCATTTGAACCACCAGACTTTTTCACATAAAACAAATAATAATTTACTGTCATATATTTGTACAAGTACCGTTAGCTCAATGCTAATACAGATCTGAAGTTTGAAAGGGTTAAAGACAGTTTGTATAAATTAAAGTCCATGTTACCAAGCACGAAGCTTTTTGTTTTAACGAAATTTGAAAATAAATTAATATAAGTCCTAGAAAACAATTTAGTTTAGAAGCATTTCCTGTGGACAATGGATGGGCCAGATTCGTCATATTCCTGTTTGCTGATCCACATCTGTTGGAAGGTGGACAATGAAGCCAAGATGGAACCACCGATCCAGACGGAGTATTTCCTCTCTGGTGGGGCAATGA…
>GalT_60
GGGTTTTACAGCTTTATTTGTGTACAACGAAGAACTCTATAAAAGTAATACAAAATAGTTCGAATTAAGCGTCTTGCTTGGAGTTCTCCACGACACGGACTGTAACGACAGTGCAGATCATTACTAGTTTTCAGATCTATATTTAACTTCAGATCTCGAGATAAAGTTTTAACAATGATACAAAAGTATGCTATCTGCACCAGTATATAACATAACAATAATTGCAGTTTTGAACATGATAGTTTGTAGTTTAAAAGCATTTCCTGTGGACGATGGATGGACCGGACTCGTCGTACTCCTGTTTGCTGATCCACATCTGTTGGAAGGTTGAGAGTGAAGCCAAGATGGAACCACCGATCCATACGGAATATTTCCTTTCTGGTGGAGCAATAATCTTAA…
>GalT_65
TCAGCAATACCTGGGTACATGGTGGTACCACCAGATAATACGGTATTAGCGTACAAGTCTTTACGGATATCAACATCACATTTCATGATACTGTTGTATGTTGTTTCATGGATACCGGCAGTTTCCATTCCAAGGAATGAAGGTTGCATAAGAGCCTCTGGGCACCTGAATCTCTCATTACCGATTGTGATAACCTGTCCATCGGGTAATTCATAACTTTTCTCTAAAGATGACGATGAAGAGGCTGTGGACATTTCTTGTTCAAAGTCTAATGCTATATAGCACAATTTTTCTTTAATGTCTCTAACGATTTCTCTCTCGGCTGTGGTTGTGAATGAATATCCACGTTCTGTGAGAATTTTCATAAGATAGTCTGTGAGATCACGACCGGCAAGATCC…
>GalT_78
GATGAGGACAAAGACAAGGATAAGAAGAAAAGAAAAAAATTAAGGAAAAATACACTGAAGATGAAGAATTGAATAAAATGAAACCAATCTGGACCAGAAACCCAGATGACATTACACAAGAGGAGTATGGAGAGTTCTACAAATCCCTGACTAATGATTGGGAGGATCATTTGGCTGTCAAGCATTTCTCAGTAGAAGGACAGTTGGAATTCAGAGCTCTACTGTTTGTTCCAAAGAGAGCCCCATTTGACATGTTTGAGAACAAAAAGAAAAAGAACAATATCAAGCTGTATGTAAGGAGAGTATTTATCATGGACAATTGTGAAGACCTCATCCCAGAATATCTCAATTTTGTTAAAGGTGTCGTCGACTCAGAAGACTTGCCTCTCAACATTTCCA…
>GalT_91
TTTTAATTGAAAATGGTTGCACCAGAACCATTTTGTTGCAGTAGGTCGGTTTCCATTTAACAACAATAAATAATCATTCTTGTTAACAAGTGAAAAAATAATAATAGAAAAATATCACACAATATTTTGGGTCTAGACAAAGAACATATAAAATGCTGCTATAAGAATGCCCACAAGGAGCAAGATCTATGTTAGGAAAAAGGTCCAATAATCCTCGTCGTTGTATGGGATTCTGAGATTGGAACATTATATCACTCATGACTAGCCCATTAATAACACACTATGGATGAAAAACAGTATGGAGGGACTAAAGTTCATTTTCTTTATAAGGATTTCTCCTTCTTAATGATCTCTTCTACTCCTTTTCTCATTTCCTGGATGGCTTCATATTCAGTGAGA…
>GalT_99
AAGACTGTGGTACAGCGTCACGCGTGTTCCAAGAATAAGAGACACAGGGCGTACAAGAACAAGGAAGAACAAAGCCCAACGAAACATTAAGCAACATGGCAAAAACAGGTCCAGCAATTGGAATAGATCTTGGAACTACATACTCCTGTGTTGGAGTTTTCCAGCATGGCAAAGTTGAAATCATTGCCAATGATCAAGGAAACAGAACAACCCCAAGCTATGTCGCCTTCACAGACACCGAAAGATTAATAGGTGATGCTGCCAAGAACCAAGTGGCAATGAACCCAGTCAACACAGTTTTTGATGCCAAGAGATTAATTGGTAGAAAGTTTGATGACGCCACAGTACAATCAGACATGAAGCATTGGCCTTTCACTGTTGTCAATGATGCCACCAAAC…
>GalT_102
AATCATGGCAGTGTCTGGCAAATGATATCACAGATAAGGTGTATTATACCAGAAATTTGTTGTCGTTAGTAAAGTGGTATCATGGCAGACCACAGATCTTATGATTTTCTAACGGCAATAAATTTCACAGCTAAAATTCATTAAACTAACAAATATATACATGGCAACTCTCATAGGATAGAAAAATCTATCTTCATACAAACATTACATTCTCCCTGATGTGTAAATTATAAAAGGAATGGTCCCTTCCTTAGGACGAATACCAAAAAACAATTCATTATACAAAATATATTGCACATATAAAAATCATTGTTAATTGATAAAAATATCCACACTATTCCGTCCTAAATGTGTTTAAATAGTCTCTAAAATATTTATAGTTTTACAGCACCATAAAAT…
>GalT_108
GGCAGCAGCAGGTGCAGCAGCAACAGCTCCTCCTGCAGGTACTGAGGCCAGCTTTTCTTGACCTTCTTTGATCAGGTCTTCAAGGTTTTTTCCTTTGAGTTCACTTATAATTTTCTTTATCTTATCAGCTTCGGCTTCAATTCCAACTGACCCAATAATCTTTTCAAGGTCACTGGCTGATGGATTTGCGTTTCCTCCTAGGGATGCAAGTAGGTAAGCTGCCACGTAACGCTATTTTTAAGTCTTTCAGACACGAAACTGTGAACAACTTCTTTGATCAAGTAAAATGGTTTCAACGACGGTTATCTTGTTTTTGTTGTGTGTGAATGGGAGGGACTGGTTATTATTATCACTATATAGGAAGAAGACCAACTATTTTTTGTCTTCATTGAGTACATC…
>GalT_121
ATCGTACAAGAAAATTGATAAACCCCAGACTTAGGAGCAGTATATATCCCACTGCTAGCATCATAACCATCTCCAATATTTGCCCATACTTTGTCAAATATAACATTAGTATTGGCTGTGAAGGATTTTGTAGTGGAACGAGAAGCTAGAAAATGCAGGGACATCTTTACCGCCATGACCTGTAACTGAATGACAGCTACCTGATCCTTTTAACTTCAACATCATATTAAGCAGGTCTTTGAAGAGGTTGTTTCC
>GalT_123
ATTTTTGTATTCAAAACACCATCAAATACATTTGTTTACAATTTAAATTTAATAGCAAATAGCAAAGTAAGAGAGTTGTTCATGGTTTAAAACGAGTTCATACTATGCTTGATAAAAAGATAATGATTGTCTTATTAAGAGATCTATGTTTAGAAACATTTACGATGTACAATGCTAGGACCGGATTCATCATACTCTTGCTTACTTATCCACATTTGTTGGAAAGTAGAAAGTGAGGCTAAAATAGATCCACCAATCCAGACAGAGTATTTCCTCTCTGGTGGGGCAATTATTTTGACTTTCATGGTCGGTGGACACAAAGCAGTGATTTCCTTCTGCATTCTGTCAGCTATTCCGGCAAACATGGTGGAACCTCCAGATAGTACTGTGTTGGCGTAT…
>GalT_126
TTCTGCATTCTGTCGGCAATACCTGGGAACATGGTGGTACCACCAGACAAGACGGTGTTGGCGTACAAGTCCTTACGGATATCGACGTCACACTTCATGATACTGTTGTATGTGGTTTCATGGATACCAGCAGATTCCATACCCAAGAAGGATGGTTGGAATAGTGATTCTGGACACCTGAATCTTTCGTTACCAATGGTGATAACCTGTCCATCGGGCAATTCGTAGCTCTTTTCTAGGGAAGATGAGGAAGCGGCGGTTGACATTTCCTGCTCGAAATCAAGAGCAACATAGCACAATTTTTCCTTAATGTCTCTAACGATTTCTCTCTCGGCGGTGGTTGTGAATGAATAACCTCTCTCGGTGAGGATTTTCATCAAGTAATCAGTAAGATCTCTA…
>GalT_127
ATAGCACAATTTTTCTTTAATGTCTCTAACGATTTCTCTTTCGGCTGTGGTTGTAAAAGAATATCCACGTTCTGTTAGAATTTTCATCAAATAGTCTGTGAGATCCCGTCCGGCAAGATCCAACCTCATAATAGCATGAGGAAGGGCATAACCTTCATAGATGGGTACTGTATGGGATACACCATCACCAGAGTCCAACACAATACCAGTTGTACGACCAGAAGCGTATAAAGACAAAACGGCCTGAATAGCAACGTACATAGCTGGGGAGTTGAAGGTTTCGAACATAATTTGGGTCATCTTTTCTCTGTTGGCTTT
>GalT_146
CGGTCACTCAAAACAGACAATTCATCAAAACTTTGAACATTAAAGCTGTTTTCTCTTGAAGGTACTGAAGCTATTCCATCAAGCTCCCTTCGTATCTCGCAATCCAATACCAATAGCATATATATGGATACCAGCATCCCTAGACTTCCCTGCCTCTGGAATGGTCCTTCTGGAATTAATATTCGATACACCATCAGTCAGAATCAAACAAATGTCTGGAACACCTAGACGGTCGCCATTTGCAACAGAAAACATTTCTTCTCTCATTCTTTGTAAACTATCGGCTGTGTTTGTGCTGCCATAACGATAAGGAATGTTATCGATTTCGTCAAGTATTTCTTGGGAGGTAGAGAAGCTGTTTAGGTAGAATTCCACTGTAACAGCTGTACTGTATGACAA…
>GalT_148
ATGATACTGTCTATGTCATTTCATCAATTCCATATTCATCACTGTTTTGTTTTCTTTTGCAGCTGTGCACGTCTTTTCTGCTAAGGATTCTTCGATAGATGATAAAGCTGCATAGTTGTCAACTAGCAAAAGAATGAGTTTCAGTCGGAGAAGAAGCCATGATGTCTAATCCAGTCTGATCAATGTATTGCCCAACGCCTATTGCAAAATGATGATCCCTTCTTGCTTTCCTTTCTCTGCTGCTATGCGTGTTGCTTCAATGTCTGTTGGTTCACCATCCGTTATCAAAATGGCAATTTTGGGAATCTTCCCACCTCGTCCGCCATTAAGGTTAGAGAAGCCTTGTTGAGTCAATAGATTTAAAGCTTTGTTTGTGTACGTCAACTGCATACCCTGTAA…
>GalT_153
GGGTTCTGAAGCAGATATCGTAAAGAGCCTCGTTGTCGATACAGTATGTTTCATCTGTGTTTTCTACGAGCTGATGTACTGAGAGTGTGGCATTGTATGGTTCAACTACTGTGTCTGATACTTTTGGTGATGGTACAACTGAGAATGTGTTCATGATTCGGTCTGGGTATTCTTCACGGATTTTGGAGATAAGGAGTGTTCCCATTCCTGATCCGGTTCCACCTCCAAGTGAGTGTGTAAGTTGGAATCCCTGAAGACAATCACAGCTTTCAGCCTCTTTCCTGACAACATCAAGAACGGAATCTACAAGTTCAGCACCCTCTGTGTAATGTCCCTTGGCCCAGTTGTTTCCTGCACCACTCTGTACCGAAAACAAAGTTGTCTGGTCTGAAGATTTGA…
>GalT_154
TTGTTCTGAGATTCTCTTAAAGAGTTCCTGGATGGCAGTGCTGTTACCAATAAATGTGGCAGACATCTTAAGACCACGTGGTGGAATGTCACAGACGGCTGTCTTGACGTTGTTTGGAATCCATTCAACGAAGTAGCTGCTGTTCTTGTTTTGTACGTTCAACATTTGTTCGTCGACCTCCTTCATGGACATACGTCCTCTGAACATGGCAGCAACTGTGAGGTATCTGCCGTGTCGGGGATCGCAAGCTGCCATCATGTTCTTGGCATCGAACATCTGTTGGGTAAGTTCTGGTACAGTTAAAGCTCTGTACTGTTGGCTTCCACGTGATGTCAGGGGAGCGAATCCTGGCATGAAGAAATGGAGACGTGGGAATGGTACCATGTTGACAGCCAATTT…
>GalT_155
ACAAGATGGTTAAGATCACCGTATGTTGGTGTTGTAAGTTTGAGGGTTCTGAAGCAGATATCGTAAAGAGCCTCGTTGTCGATACAGTATGTTTCATCTGTGTTTTCTACCAGTTGATGTACAGAGAGTGTGGCATTGTATGGTTCAACGACTGTGTCTGATACTTTTGGTGATGGTACAACGGAGAATGTGTTCATGATTCTGTCTGGGTATTCTTCACGGATTTTGGAGATAAGGAGTGTTCCCATTCCTGATCCGGTTCCACCTCCAAGTGAGTGTGTAAGTTGGAATCCCTGAAGACAATCACAGCTTTCAGCCTCTTTCCTGACAACATCAAGAACGGAGTCTACAAGTTCAGCACCCTCGGTGTAATGTCCCTTAGCCCAGTTGTTTCCTGCA…
>GalT_164
GTAAAATGGCACCTCCATCATATTCCGATTTAGGAAAATCTGCCAGGGATCTCTTCAGTAAAGGTTACAACTTTGGAACCAACAAACTAGAGGCTAAAACAAAAACAGATAGTAAAGTAGAATTCACAAGTAAATTAGACCACAATCATGATACTGGTAAAGTTGCTGGTAGTTTAGAAACCAAGTACAAATGGAAAGATTACGGATTAACATTCAAAGAAAAATGGACAACAGACAATGTGTTAAACACAGAAATAACTGTTGAGGACCAAATTGTTCAAGGTTTAAAATTAGCATTTGACACAACATTTGCTCCACAGACAGGAAAGAAGCAGGGAACAATTAAGACTGGATACAAACAAGATTATGTAAATATGGAATGTGATGTTAACTTTGATT…
>GalT_173
GATTGGAGCTGGGTAGAATGTATATCACAGTCCTGCATGTATACAATCAAAACAAAGGACATAAACATAAATTGCTGTAAAACAGGAGAGATTACTGTCTTTAGAATTTGGAAAGTCATTCGTATACCATGGGTGCCTCAATAAGAGAATAAGTGATGACCTCCTCAGGTTTGAACCACAGATCTATTTCTCTCTTGGCACTTTCTACTGCATCACTACCGTGGCATATATTTCTTCCAAGATCAACACAATAATCTCCACGAATTGTTCCTGGAGCAGAG
>GalT_181
TTTTGTTCATCATTTACCGGTGAAATCTCTGTAAAGATGGCTTACGCAGGATCAGTTGTCAACCCACCTCTTCCATATATCGGGGGAATACCCGGTGGTATGACAGATGGCCGACAGATCATTATACAAGGAACCGTACCATTTCATGAAAATGCATTTACAATAAATTTAATGAGTGGCTCTAGTCTTAATCCTCAATCAGACACAGCTTTACATTTCAACATAAGATTTAATGAAAATTGTGCAGTAAGAAACTCTCTGCAGAATGGATCAGTGGGGATCGGAGGAGAGAACTGGTGGCATGCCTATTTCAAGTAAAAACTTACCCTTTACGAAATAATAATTTTATGTCAGCATCATCACTACAAGGTAGCCGTTAATGGAAAACAATTTCTTGTT…
>GalT_182
GCATGCCATTTCAGAAAAATTACCCTTTCGAAATAATAATTTTATGTCAGCATCATCACTACAAGGTAGCCGTTAATGGAAAACATTTCTGTGAATTTCGCCATCGAATTGCTAAACACCAAGTAAACACTTTGGCTGTTATAAGTCCAGCAGGGCAAGTCAACTCAATCAGATTTGATGGACCAGGAGCAAGCATGGCACAACCTGCAGGAGGATTTCCACAAGGTGGTGGTTTTCAACCAGCTGGGGCCTTCCAACCTCCACCCCCACAGCCTTCAGGATATCCTGGTGCACCAATGATGAACCCGCCTGTACCACTTGTTACACCAATCCAAGGAGGATTATATACCCGGAAAAATGATCAATATAAGTGGTGTACCAAATCCAACAGCAACTAGG…
>GalT_202
AAGACACAAAGACAAAATGAGGGAAATAGTACATTTACAAGCCGGACAGTGCGGTAACCAAATTGGTGCCAAGTTTTGGGAAGTCATTTCAGACGAGCACGGTATCGACCCCACCGGAACCTACCATGGAGATTCAGATTTACAATTAGAAAGAATCAACGTATACTACAATGAGGCTACAGGTGGTAAATATGTACCCAGAGCAATCTTGGTCGATTTGGAGCCCGGAACCATGGACTCCGTCCGATCAGGACCATTCGGTCAAATCTTCAGACCAGACAACTTTGTTTTCGGACAGAGTGG
>GalT207
TAAATTATACTTTATTATGGTCAGTTGTATTAGGAGTAAAAAGACCTAAGGTCTGTAAACAAAAACAAAGTTTCCAAAAGTGGAACGTAAACACCCAACAATTAGCACTAAAACATGTCCATCCAAGGAATTCAGTTTGTTCATATAAAAAGCAAAGGGATTTATATAATGTTGCTTGTCTATGCACTGTCTACTTTATTCATGTGTAGTAATAGATCAATCACTCTACAGCTGTACCCATACTCATTGTCATACCATGAAACAAGTTTTACAAAGTTATCATTAAGAGCGATGCCAGCTTTGGCATCAAAAATGCTGCTCCTGTTGTCTCCACGGAAGTCTTCTGAGACAACATCGTCTTCTGTGTATCCCATAACACCCTTCATTGGACCCTCAGAT…
>GalT_208
GGAACCTACCATGGAGATTCAGATTTACAGTTAGAAAGAATAAACGTCTACTACAATGAAGCCACCGGTGGAAAATATGTGCCACGTGCAGTGTTGGTCGATTTGGAGCCTGGAACCATGGACTCTGTCAGATCTGGACCATTCGGTCAAATCTTCAGACCAGACAACTTTGTTTTTGGACAGAGTGGTGCAGGAAACAACTGGGCCAAGGGACATTACACAGAAGGTGCTGAACTTGTAGACTCTGTTCTTGATGTTGTCAGGAAAGAGGCTGAAAGCTGTGATTGTCTTCAGGGATTCCAACTTACACACTCACTTGGAGGTGGAACTGGATCAGGCATGGGAACACTCCTTATCTCAAAAATCCGTGAAGAATACCCAGACAGAATCATGCTCACA…
>GalT_241
ATTGTCTGGTTCTGATCCTGCACCAAATACTTGATGCTGATTGTTTATTTGTCAACTGCCTTATAAATAAAAACTAACACCAACCAGGTGTCCAGTAACCATTATAATTATTTGGGTCCGATGCAGGGTCTGCTTTCTCTGTTACAGGTGGAACGATATATTTTCTGTATTCTTCAAGCCTTTCTTTCATCTTTTTAAGCATGCGGTGTTCCTTAGTGTGCAAATTATTGCGTTCATTAGGATCATCTCTCAAGTTATATAACTGGTAGTAGTCTACTTTTGGTTCATCTATTTTTGCGTCTTCTTCGGTCTCCGGAACTGGGTACCAGTCATTAAAAGCACCAGCAAATCCTTCTATTAACTTGAAATCACCCATTCTAATAGCTGCACGCCCCATAA…
>GalT_245
GCACTGACTGTGAGGTATCTGCCGTGACGTGGATCGCATGCTGCCATCATGTTCTTGGCATCAAAGATCTGTTGGGTAAGTTCCGGTACTGTTAGTGCACGGTACTGTTGGCTACCACGAGATGTTAAAGGTGCAAATCCGGGCATGAAGAAGTGAAGACGAGGGAAGGGTACCATATTGACGGCTATTTTCCTGAGATCGGCATTAAGTTGACCTGGGAATCTAAGACAAGTTGTTACACCAGACATGGTTGCGGAGATGAGATGGTTAAGATCACCATATGTTGGTGTTGTAAGTTTCAATGTACGGAAGCAGATGTCATACAGAGCCTCGTTATCGATACAGTATGTTTCGTCTGTGTTTTCAACCAACTGATGTACGGAGAGGGTTGCATTGTAA…
>GalT_250
TGAAAACAAAACTTTACGACACAAAAGATGAATTTGGCTTCCCAATTGCGAACTTTCCATTTTTAAGTAGCAACATTCCAGTAGCACCTGCATACGGGGTATATATCTCCCTATTTATACGATATTCTCGTGCTTGCATTTCCTATCAGGATTTTTTTGATAGAGGGTTGTTGCTCATAAGAAAGCTATTAAACCAAGAGTTACAAATGGTTAAGTTAAAATCATCCATTCGTAAATTTTACGGCCGCCATCACGAGCTGGTTGACCGTTATGGAATAACCGTTTCACAAATGATATCGGATATGTTCCTTACGCCCTAACTACAATCCCCTTCCCTTTCATGAATGTGACCTACCGAATGAGACTATTTACCAGATGTGTAATAACACAAGCAACACG…
>GalT_251
GATGATGACGTGCCCTTGTCACCATTTTATGGTGTTTATATATCTCAACTTGTTCGATACGCTGGTGTATGTAACAAGTTATGTAACAAGGTAAATTCAAAAGATCTTTTAGAGTACATACAATCTAACTCTCTTTCATCTTGTAACAGTATTAAAACATTTGACTTTTCTACTCTTTACACAAGTATTCCACATTCCAAACTAAAAGACAAATTAAAAGAGTTGGTAGTACCTTGCTTCATAAAAAAGAATAGCCAACGTAGATACAAGTATCTTGTCTTAGGGAAGGAAAACAAAACTTTAACGTACAAAAGAAGATGATTTCAGCTTTCCAATTGTGAACTTTCCATTTCTAAGTAGCAACATTCCAGCAGCACCTGCATACGGGGTATATATCTC…
>GalT_257
TTTTGTTTTATAACTTTAATATTCATAATAATAGTAACAAAAATGGTGTAAAATTATAGTTAACTTACTGAAAGTGTACTGTATTGGAATCACATTCACGTATGCCCTTATCATTTGCATATGACCTAACATTAACATATAATTTGACAAATAACATTTTCAAAACAATAACAAATCCTTGGAGATCTGACGGATGACAACATCTTGGTCCCACATACTAACAATGTAACATGAAATTGCACCCTTTTGGTTCATTGCATCAAAACACCTTTAGAAAGTAGATGGCAAGATCTAATAAATGCAAATGAGGATAAAAATGAACAAAAGAGATAATTATAATTCTGAGATTGATTTCCTAATCCATAATATGTCGTGTGTTTCCCATATTCATGCCAGCTT…
>GalT_304
GACAAATTTGACATGTACATTTAGCATACATGTTTATAAGAAAGTCTACGTCACAACACTTAATGAATAAGTACTCCTAAAAGTTAACATTGTTAGATTGTGAACTTTACAGTGAACACATTTGTAGATAATGAATCTCATCTTCAGCTCTCATCTAGGGAGATTCTTTGTCCAACACTACTTCTGGAAAAGCTGATGTTGTTGAAATAGTACTGTTTAAACTTTCTTCATTTTCACTTCCAACATTTCTGTCTTGATTTGATACAACTGCTGGCATACATGATGGTACATTAATACATTCTCTCACTTGGAAGCTCTCTCCTTTACAGCTTTCTTGTCCTTGTTTAGGGACTGGACATAAACAGGCCCTTTGTCGGACCTGCATTGAATTTAGACCAG…
>GalT_312
AGAAATCATATGTCCAGAAAATGTGCAGTAATTACTGTTGTCGCCATAAACAGTGTAACTGGAAGAAGACTTCATCATTATTTGATCCCCTTTCTTTATATCCAAAATAATACTGATGGCCCCAGTCTGGTAAGCTGTGGACTTTGTATACACACTGGATACTACGGTATAATTGTGCCAAAGTCTGGCAACCAACATCTTTCCATTATCACTCAATACCACTGAAGTAAACTGATATACACCTGAAATAGGTGCAGTGAAAATGCCAGTGCTGGGATTGTAGCCGTTTCTTCTGTTGATCAGCACTTTGTTGAACTTTATTATCTCATTTGTTGAATGTGTCTTGCT
>GalT_314
CTTGTCTACATCTTATTGGTTAACGGCTTTGAAATCATATAAAAATATCCGAAGTACCATATTAAGAGGTAACAGTAAATACAACCATGATACTACTCTAAATGTTGAAAGCAGATCATTGGAATATAAACAATTCTTGATAAAAAGTTCGACAATACATATACTAAAACCAAAAATTTGATTCTAAATTAGAAATTGAAAAAAGAAACCTATAGAAAAAAAAAAAAAAATCAACATAAAACAAGGAAAAATAAAGCAAACAAATATATTTACAAAACTTAGTATAAGCAAAAAGAAACAATACTCAAAGAGGCTGTATAATGTAAACAGATACAAAATACCTCTAAATTAATGCCCTATTTATATCGCTCAAAATGAATGTCATAAATACTATCAATA…
>GalT_317
TGAATATTACATTTTAGATCTGGCGAACTTTGTTCCGTTGAACCTGCCTTTTATTGCATTTTCCATCCAGAGAAAGTTGTTCTGGTCTGACTCTCCTTGCTTAGAAGTTTGCCTTGGGTGGGCGTAGTTATTTCTGACGTAAACTTGATTGCCTGATGATACATATCTGATGACAAATCCAGTGGAGCATGCGTCGTCGTACTTTGTCTCTGTATCTGTATGTAGAACACCGATTTTTGTGCTGCCCATCATTAATTCTGTTCCATACTCCCCGTAGTTTAATTTTCCAGGGGGATTAGTATAACGTGAATCTACGCAGATGGTCCAAGTGAACGCATAAATGCCAGAATATGGAACAGAAAACCTTCCCGTGACGACGCTGTAATCTGACCCTGAATT…
>GalT_322
ATGCATTAGATTCTGAAAAGGCAAATGGAGGTCAAATGAAACTGGATTTATTATTAAGCTTCTGATCCTATGTAAAATTCCCTCCACTTTCAGTTGTAAAATAAAAACAAGTGCACACTAACAAGTAACATTTCGTGATTAAAACCTCTTACTTTTTTACATATTTTTTTCACTATAAACAGTTAAAGCCAGTCAATTTGACGATATATATAAAATGCTGTATTGAAGCTGAAGAATGCTTGACAACTTGTTATTGTAGCCGAGAGAATGTTCAAGCTGGTGGAGTCCATGGAACACGGGTCTGTGTGAACCCTTTGGTGCCATCTGGACCTTTAGGCTGACGAATGACAACAATGCGAACACTTGACAGGTCTTCTGTTACGCTCTTTAACCTACTAA…
>GalT_372
AAACAGTTCAGACACTGAGAGAAAGACTGACAACACGTCCAATGGAAACAGTCAAAGGAGGACCAATGAAAGTCATGAGAAGTACCTGGTGATTTAGAAATCTTAGTCAAACAAGTACGAGCTCAGCTGAAAAAGATCGCTATAACAGACAAGGCAAGAGTTGACACAATGTTCCTCCGATACAACAAAGACCGAACAGGATATATTGGTGGAGATGATATGAGAGCAATGTGCCGAAGCTTACAACTGCCAGTAGATGATGATGTTATCAATGAACTTGTTAGACAGTGCACATCAAATCCAGAAGGCAAAATATCATTAGAAGATTTCAGAAGATTCATTGAATGCTCATGAAGAAAACCTGGCTATTTTTAGAACTGTGATACAATTTTAAAGCAA…
>GalT_379
GTACTTATTTTTTGTAAGTCAGCATACACATTGCTATAAATGCCTTCAAATGCCTTGTATAAAATTTATCTGCTAGTATAAAAGCCTACATAAGCTGTAAAATATGACGCATATCTAATGCATCAGCTCCACCTACTGGCAAGGAAACCCTACTAAGGGGATACAATTCTTTTGAATGAGGTGATTCATTATGAATGAAAAAAAGAAATAATATATATAAATGTGCAAAAAACAACATATATATTTGATTTGTAGCTAAAAGTGAAACCTTTTTTATCTGAACTTACACGATACTTGATTTAATCAATTTAGTGTAATTTTTTGGCAAGAAATGTATAGCATGACCTACATATATAACGACTATGTACTTCTTTATAATGCCCTAATCTAAATCATGTA…
>GalT_386
ATAAAATAAAATAATTGCACACATTCACTATTTCTCTCTCCCTCACAAACACATTTGGACGGAATTGAAAGGGAAACCTACATACAATTATCACATCACAATATCTGCAATGTAATCCACATTATCAAGTTGCCATGATGGAATTTAAACAAAATAAATACTTGCCATGATTTTTACAAATTTATACATTAATGGTGTATCAGAAAATCTTCCATTACTTTTTATTATCTGTGCCATGATTTATACAAGTAATAGAAGAGCTTCAGAAAAACACTTAAATGATTATGTTATGGTCCCATTCATAGATGATCTTAATGTATAATCTTACTGGTCTCCTGACCTAAACCAAGATCAAGGGACCAGTACATATTTAATGTCTGCCATGATTTTCTTTCTTTT…
>GalT_389
AGCGGGTAAGAAGTACACAGTGACCAATGGTAAATGCGTTGTTTCAGTCTTAAAAGTAGAAATGGTATCATGCATTCCATCTGATGCTAAGCTGCTGATGTCAACCTTCGTGGGATACGGTGACAAGAAAATTGATGTAGACATGTACTCATTCTCATTTAACGGAGCTAATATTACCATGTCTGTGACTAAAGATAGCTGTGTACCTGTATCGCAACATGTTATATTACCTGGTGTTTTTATTGACCTTGGTTACATGGGAATGACCAGTGGAATCCGAAATACAACCGTATTTAATATTCCTAAGCCTTGTCAGCTGATTGAAACTTTTGAGCATCAACAAAATGGTGATGAACACATGAAACACGGAAGACACACTCCTTTAGTCTTTTAACACAA…
>GalT_390
GACCAATGGTAAATGCGTTGTTTCAGTCTTAAAAGTAGAAATGGTATCATGCATTCCATCTGATGCTAGGCTGCTGATGTCAACCTTCGTGGGATACGGTGACAAGAAAATTGATGTAGACATGTACTCATTCTCATTTAACGGAGCTAATATTACCATGTCTGTGACTAAAGATAGCTGTGTACCTGTATCACAGCATGTTATATTACCTGGTGCTTTTATTGACATTGGTTACATGGGAATGACCAGTGGAATCCGAAATACAACCGTATTTAATATTCCTAAGCCTTGTCAGCAGATTGGAACTTTTGAGCATCGACGAAATGATGTTGAACACGTGGGACACAGAAGACACA
>GalT_391
AGCGGGTAAGAAGTACACGGTGACCAATGGTAAATGCGTTGTTTCAGTCTTAAAAGTAGAAATGGTATCATGCATTCCATCTGATGCTAAGCTGCTGATGTCAACCTTCGTGGGATACGGTGACAAGAAAATTGATGTAGACATGTACTCATTCTCATTTAACGGAGCTAATATTACCATGTCTGTGACTAAAGATAGCTGTGTACCTGTATCGCAGCATGTTATATTACCTGGTGTGTTTATTGACCTTGGTTACATGGGAATGACCAGTGGTATCCGAAATACAACCGTATTTAATATTCCTAAGCCTTGTCAGCAGATTGGAACGTTTGAGCATCGAACAAAATGATGTTGAACACTGGGACACAGAAGACACA
>GalT_399
CTGATTGTCAACGAATTTCTCGTTTATGGACGGAATTTATAAATAATTTAATTGTCAATTTATCCCTTATTGTGCTTCTTCTTCGCCTTCTTCTTCCTCGAACTCTCCTTCCTCTTCCGCTGTTGCATCTTGGTATTGCTGATATTCGGATACCAAGTCGTTCATGTTGGATTCTGCTTCTGTGAACTCCATTTCGTCCATACCCTCACCAGTGTACCAATGCAAGAAAGCCTTACGACGGAACATGGCAGTAAACTGTTCTGAGACACGCTTGAATAATTCCTGAATGGCTGTTGTGTTTCCAACGAATGTGGCAGACATCTTAAGACCACGTGGTGGAATATCACAAACTGCTGTCTTGACGTTGTTTGGAATCCATTCAACGAAGTAACTGCTGTT…
>GalT_400
AGAATTCGTTAAAGCTGTATCTGAATAAAAATGCATTGAATGTATCCAAAAAACAAAGGAGTTTTGATAAAATAATGCAATTATTACTTTAATTAATATTTAAAACTACATGAAGAACACATCTTTTTTTCAGTGTCTCTTTCCGAACTTATCAATTAGACATGGCACTTTCAGTAGAATTAAAATTTTGTTTTCTAATGTTTATTTAAGCTTCCTCTTCTCCTTCTTCCTCTTCGAATTCTCCTTCCTCTTCTGCTGTTGCATCCTGGTATTGTTGGTATTCTGAGACCAAATCGTTCATGTTGGATTCGGCTTCTGTGAATTCCATCTCGTCCATACCTTCACCAGTGTACCAATGCAAGAAAGCCTTACGACGGAACATAGCGGTGAATTGTTCCG…
>GalT_401
CTGATTGTCAACGAATTTTTCGTTAATGGACGGAATTTATAAATAATTTAATTGTCAATTTATCCCTTATTGTGCTTCTTCTTCGCCTTCTTCTTCCTCGAACTCTCCTTCCTCTTCCGCTGTTGCATCTTGGTATTGCTGATATTCGGATACCAAGTCGTTCATGTTGGATTCTGCTTCTGTGAACTCCATCTCGTCCATACCCTCACCAGTGTACCAATGCAAGAAAGCCTTACGACGGAACATGGCAGTAAACTGTTCTGAGACACGCTTGAATAATTCCTGAATGGCTGTTGTGTTTCCAACGAATGTGGCAGACATCTTAAGACCACGTGGTGGAATATCACAAACTGCTGTCTTGACGTTGTTTGGAATCCATTCAACGAAGTAACTGCTGTT…
>GalT_405
TCTTCTTCTTCCTCTTCCTCATCAAAGTCCTGTTCTTCTGAAGTTGCATCCTGATACTGTTGGTATTCAGAAATTAAATCGTTCATATTCGACTCCGCCTCGGTAAATTCCATCTCGTCCATCCCTTCACCAGTATACCAATGAAGAAAAGCTTTACGGCGAAACATGACTGTAAACTGCTCAGAGATTCGCTTGAATATTTCTTGAATTGCTGTACTGTTACCCATAAAAGTAGCCGACATTTTCAAGCCTTTTGGTGGAATGTCACAAACAGCCGTTTTGACATTATTTGGAATCCATTCTACAAAATATGAACTGTTTTTGTTCTGGACATTTAGCATTTGTTCGTCAACCTCTTTCATTGACATTCTCCCTCTAAAAATAGCAAGCAACAGTCAA…
>GalT_417
ATTTTATTTTGACAACTTTATAATTTTAAGTTCTCATAATTTCAAAAAAACATAGCACTTTAGAGGATATATAAACTAAAGTTAAAATATTAATCTAACATGTATAAGGAATAGCCTTTAGCTAAAAATATAATTAAATAAATGTCAAATATATGATGCAATGTTTAACAAAAGTCCATTTTTTATTTGATTACGAAAGGTTTATGAATGATAGTTGCTGGTCATCAATGTTTATGTCAAGGTGGTTTTTCAATTACAGGTCGGACTTTGATTGAGATTTCTACAGAACGATCTACGACGTCTGAGTACAAATGTGTAGGTCAGTTCTGGGTAGGTTCCATCTCTGCAAGGGTATGTCATTTCACGTCGCACAGCACATCTGCTCACAATTTCGTACTC…
>GalT_424
GTTTGGTTGTGCTGTCGGCTTCAAGTCTAGAGTAGTAGAAAATTCAAAATGTCTCAAGAAAAAGTTAGAAATTAGGAGAAACATCAAGACTGCGCCTACTATTGGGACGAGGAGCACCGTTATCAACAGAACAAGTCATGGCGGTGGCAGCATCATGCCCCGGTGGTGGCTCTAGAAGTGTATCAATGAGAATGAGTATGGGTGGAAATTCGAGCTCCCTCTTTTGCACGAGGGGGCAGTTTCATCTATGTCTCATAAGAATGTCGCTAACGTCTTGGACACCAGAGCCAAAGAGAAGACTAGAAATGTAACGTTTTGAATGAAAGATTTGCTAGTTACATACGAAAAAGTGCGTTTCGTAGAAGCTCAGAATAAAGCTCTTCTTGCTGAAATTGATAG…
>GalT_428
GTCCATCTTTGTTCTTCGAATGTTTTAGGTGAAGCTGGAATACATGTTTCTCCATCTAATTTCATCCTACAGTAAACTTCAACAGCATCAATGAAGGTTCCACCATTGGGATCAATATAATACCATCCATCTTCAGAGTCTGGGTTCTGGAGAAGAATATCTTTGCAGGTGACACCTGGATTATGTTTCTTGCCATTTGGTTTTTTGGTACGTAGGAGGGCCTCTTGAATTCTAGACAAATCTTCGTTTACTTGTGGAGTAGCCTTTGGATCGTCACCGTAATATAGTGGATCTGGTCCCTT
>GalT_437
ATTTACCAACACCAATGGCAAACATAATTATTCCTTGTTGTTTTGCTTCTTTTACACGTCTTTGTGTAGCGATCAATGTCTGTTGGTTTACCGATCCGTAATGATAAATTGCAATTTTAGGAACCTTTCCACCACGCCCGCCATTTTGTTTTAAGAATCCTTTTTGTATCAGCATTTGTAGTGCTTTGCCTGTATATGTAAACTGCATAGTCTCATTGGTGTCTAAATATTGGACCTTTTGGAAACTAGCCTTCATTGACTTCATCTTGATCTCTGTAACTGTTCAGCTTAAATTCAAATATGGGATCATTTCCAAAATTTATGAAACCAACTTGTATGTCAGTAGGACTGACAGTAAATCTCTTCACTACGGCTTGCGCAAACTGTTTCAATTTATTA…
>GalT_448
CGCCATCACAATTCCGCTCACTCATTCATTTCACCTGATTTTCAGGAGATTATCAAGTATGGCAAACCCAAAATGTTTTTTCGATATGTCAATTGGAGGCAGTCCAGCTGGTAGAATTGTTATGGAGTTGAGAGCTGATGTTGTACCAAAAACAGCAGAAAACTTCAGAGCTCTCTGCACTGGTGAAAAAGGTTTTGGATTCCAAGACAGCAAATTCCACCGAGTAATCCCAGGATTCATGTGTCAAGGTGGAGATTTCACCAGAGGAGACGGAACTGGCGGCAAAAGCATCTATGGCAATAAATTTGAGGACGAGAACTTCAAGCTGAACCATACTGGTCCAGGAATTTTATCCATGGCAAATGCTGGTAAAAACACCAATGGATCACAATTTTTCCT…
>GalT_476
ATTTCTCCATTAGTTGTGATATTTTGCTGTATACTGGTTGTGAAATCTGAAACATGCCTTGGGAAAAATGAGAAATCCATATTGTCTGGTATAAAATCTTCAATAAAGAAATTGGAAGAAAAATTGGAAGGAAAATCTCGGAGATGCAGACCAGGATGGAAAGAATACAAGGATAACTGTTATTTCTTTTCAACTGACAAAAAAACTTGGAAAGAGGCGGAGGTAGATTGTCGAAATCTTGGAGGCTACCTTACACAAGTTACTGATTCTGCCGAAAATTCATGGATTGTCACTATGATCACAGGTAAAAAAGTGATTCAGCAGCACTACTGGATGGGTGCATCAGATTTCAAGGAGGGTGATTGGAGATGGGTGAACGATTTGTCTAAAGTAACTTAT…
>GalT_494
GAAATAAAGACTCAATAGGTTTTAGGTTTAAAAATTAGAAAGAAACTAGCTGAAGCGTATCTGGGAAAGAGGATAACAGATGCTGTAATCACAGTACCTGCATATTTCAATGATTCCCAAAGACTAGCCACAAAGGATGCCGGGTGCATTGCAGGACTGAACGTATTAAGGATTATAAACGAGCCTACTGCTGCGGCATTAGCTTATGGTCTTGACAAGAATCTATCTGGTGACAAGAATGTTCTAATATTTGATTTGGGAGGAGGAACATTTGATGTGTCCATTCTGGCGATTGGTGAGGGTTCATTATTTGAGGTTCGGTCCACTGCTGGAGATACTCACCTTGGAGGGGAGGATTTTGATAACAGAATTGTTAAACATTTCATTTCTGAATTTAAG…
>GalT_508
AAATAATTGTGCATTTGCTGCATTCATCAGAATTTGAGGTGCATCCAAGTTGCCATTTTCGGGTCTGGCAATTTTTAATGGAGGACGGGCTGTTGCATACCACATATCAAGGTTATTATCAGTTGGTGGTTCTGTTTTATTTCGTGTTGTCCATTGACTTGCTGTTCTTCCCTTTTCCTTTTTGATGGCATTTGGATCTGTCATGTTCTGAGGTGGTTGGTGTGGGATTCCAAGTATTCCTGTTATTGAGTAGGTTCCTCCTCTTTGCATTGCATCTCCATTAGGAGAATTTGAATGTGGCATGGATGGGCTATGTGCTTCATTTGGGTAACGGTGGACTTCTTTTGGTCTATAGATCGATTTACTATCGGCAGCACGATTTCGAACAATCCTATTGAT…
>GalT_534
CTTTTCAATACAGATATCATATAGATGACAATGTAATTCGTATACTAGTATATATATATTTCATAAATATAGCACTTAATTTGCTGAAACAAAAAAGAACAATAGAATAAACAGTCACGTATTTCTACAATATTTTAACAATTCGATTACTTTGAAAAACAAAATATTCATAAATTAGAAACTACTAAAACAGCACGGTTTCTTTTTAAATTAATGTTAATATACATTTCTAAACGTGTTTGTTGTGGTTTGATCAAAAAAATAATGGGGTAACTAGAGGGCAGTGAGATCCTAGGAATTGCATGTCGGGTTCTTATTCAAATTTCTACAATAAGATTGGTGACGTCTGATCACAAATGTGTAGGTTAGTTCCGGGTAGGTACCAACTCGACAGGGATA…
>GalT_535
GCAATTTAATTTTTGAAAGCAATTAATAAGTCTTCATTAGTTTCTGAATCTGTCCATAACATCTAATCATCCACGTTGTAGGCAAAGTAACTCTTAAGCTGAACATTTCCGCTGTATAAGAACATCTCGCATGTTTCGTAGAGGATCAAAGCTTGAGTCGGAGAAAACATATTTGTTATACGGCTCTGTTGCCATCTCTTTGAAAAGTTACCTGGTTAGTATGGGAGCCAATGCCTATCACCATCACTTTTATTCCCGCTGTTTTTAGCCTTTTGAGCTTCTCCCAGTGTTTTGGAAAGTCCCTTGTCAGATCCATTTGTTAGTATGACCATCATTTTCTTTGCCTTGCTGCGAGAATCTGGAAAACTGTTCTTCCTTGTATATTCAATAGCTTTTCCG…
>GalT_541
TTTTTTTTTTTTTTACTTATGTGCAACTTATTTATTCAAAAGAAAGAAGACTTTTACTTGCAAAAAGAGATAACAAATAAGTTTTAATATCTTCACGTTCGAAAACTGGTTACTTGATTTTAGCTGCGGTGAAGGTCGAATAAGTTCCGTATACATACATTGTTTTCGAGCTTTTTACGCTGATGGTATCTCCGATTCCGAGCTCAACAACGATAAATCCAGTACCACTTTGGTCAACAGTTCCCGAATTTCCGGAGATGTAAACCTGAGTTATCTGTAGGGTATTTTTGAATATTTTGAAGGCACCACCATTGGTTTTTGAGTTGACTGTAACCCCTACGACATAGAGACCGCTATGTTGTGCCTTGAATGTTCCTGAAGTGGTGAGAGTTGACTTGT…
>GalT_553
CATCCATATACACCTCTGCTATATGGGGAGGACAAGCACTGCTATCCTGGAAGTGATTGACCTTACTGCAAAGAATTGAACTATCAAACAAATCAAATAATTAATCATATACATATGTTCTGATTTCAACATGTATGTATTGCTATGTCTGGTTATTTATGGTCCTCAGAACAGCATTCATCAGTGGGGTACTTTGTTTTGCCGTCACAAACTCCTGCATAATCATCAGACTTCATGTTCCATGTCATAAGGCCTCCAAAACCATGTTCTTTAATCCATTTTGCCTTTATTGTAGTACTTTGTACATCATCATAACTGACCCACT
>GalT_576
GTTGTTCCTTGTCTGGACAACTACTTTATCAGCAACCAGGTAGGCGGAGTAGAAACCTACACCAAACTGTCCAATCATAGAAATATCAGCTCCAGCTTGAAGAGCCTCCATGAAAGCTTTAGTACCAGACTTGGCAATGGTACCCAGGTTATTGACCAGATCAGCTTTGGTCATTCCAATACCAGTATCAATGATGGTCAGTGTGTTGTTGTCCTTGTCTGGTATGATTCTGATTTCCAGATCTTTTCCTAAGGTCCAGTTTTGTAAGGATCAGTCAAACTTTCATATCTGATCTTATCCAAAGCATCAGATGAGTTGGAGATCAATTCTCTCAAGAAGATTTCTTTGTTAGAATAGAAAGTATTGATGATCAAGCTCATCAGCTGGGCAATTTCTGCC…
>GalT_583
GAAACCCCACGCTGCACGTCTTATCACCCTACGGAGAAGACATGACCAAACTATAAACCAGACTCTGATGATCTTTCAGAAGAAGCTGTTACTACATTCGTACAAGCCTTTTTAGATGGCAAATTGAAGGCTCATTTGATGTCAGAAGAAGTACCAGCAGACTGGGATTCTAAACCAGTTAAAACTTTAGTAGGAAAGAACTTTAAAGAAGTAGCTTTTGATCAAGATAAAGCAGTTTTAGTAGAATTCTATGCCCCATGGTGTGGACATTGTAAACAATTAGCCCCAATTTGGGATGAATTAGGAGAAAAATTCAACGATAAAGATGATATTGTTATAGCTAAAATGGACTCTACAGCTAATGAAATAGAAGATGTTAAAGTTCAAAGTTTCCCAACT…
>GalT_606
AGCCAACTGGTCCTGCTGGTCCCGGCGGCCCCTTCGGTCCTTCTGGTCCATCTCTGCCTGCCTCTCCCTTGTGACCTGGTTCCCCAGATGGTCCTGTCATTCCTGGATCTCCGGGCATACCAGCATGGCCTTTAGGTCCAAATGGTCCAACTTCTCCCCTTTCACCAGCTGGTCCTTGGTTACCTTGTCTTCCACTGTCACCCTTGTCTCCTGGTTGTCCTTGTGGTCCCATCATTCCATCTAGTCCCCTCGTATCCTGGTTCACCTGGAGTTCCCTGCTCTCCCTTCTGTCCTTGCTTTCCTTCAGGTCCTAATTGTCCTTCGCTTCCAGGAACACCTGGTGGTCCTGCTGTTCCTGGTTTTCCAACAGGTCCAGGTGGGCCAGGTGGTCCAACTTTA…
>GalT_626
ACTCGTGTAGATGTTGTTGTTGTCTTGACAGACGGAGCTACAAATACCTGGCAGTTATGATAGGTTAACTGGAAGGACCAGGGGAAAACAAAAAGAACCCAAAAACTAGAAGCAGCTAAAATTAAAAGAAAGAAGGAGCTTTTATATTTGCCATTGGCGTTGGAAGGGGGGTTGGATGTCAACGAACTCAATGGAATATCCAGTGATCCAGATCAAAGATTTACCATCCAAGTGTCAGGTTTCAATGAGTTAAATTCAGATGAAGTAAAGCAGATGTTGCTAAAACGTGCATGTGTTGAAATAGAGACTACACCAGCACCAACACCCGCACCTACAACAACACCAGAACCTAAAAACCGAAGACTGCAAGGAACTGTTGGCAGACATTTTCTTTGTACT…
>GalT_633
AGTACTATATACCAATGCGCCAACTCGAACTTTGTTAGGGCCAAGCTCAAAGGATCCGATAATATCAAGTGTGAAATTAATCACTTTCGTGAAATCTTCTCTGTGAATACTTTCTGATCCGTCTATGGCGAACACAACATCCCCTGGACCTGGGCATGGTGTTGCAACCACAGCACCGTTTACAATAGCAACTAATAGAACAGGAATAAACAACAACATCATGGTATGTCTACTGTCCAATTGTCTCACTGGAGCTTCAGACAAGTGTCGAACAAGACAGAAAATCAATTCTGATACGTAAGAAAAAGGACGA
>GalT_647
AATATAAAAAATGTGCTGGTTGAATAGATATTTCTAACAAATTAGCCAAGTCTTTCTATACAAATCTGTTTTCTAATGCTGTGTGCGTGATGTTGGTACCAGTTGAAGCGATGGGTCAGTAACACAAACACCTTTGAAGTATGGGAGATACCATGGTGGACGACCGTCATAAAGTCCAGCTGGGGTCAGACATTTCAAACCTGTGGCACAACTTGGTGCAAATGCTTCACAAATTTCTCCAACATTGTGTGCGCATACATAACAACATCCACATGGAAGTTTGCCCAATTCACACCCCTGTGGCCTCGGACCGCATTGAACACTGGCACAATTGGCACACGGTAAGGAAGCGCCATAAACTATTGATATATGAATCATGGATAAAATCAAAACAGTTGC…
>GalT_649
GCTACGTATGGGCGAACATTTACATTATCTGGTAGTCAGACAGGTATCGGAGCGGCGGCTAGCGGGCCTGGTAGAAAAGGGCAATATACCAGAGAAGCTGGTGTCATGTCGTATTATGAGATATGTGCTCTTCAAGAAAGTGGTAAAGGCCAGACAGTGTACGACAGTGAACAGATGGTTCCATATTATACTGACGGTTCATTGTGGGTTGGTTTCGACGACGAAGTTAGTCTTGACAATTAAAATTGAATGGTTGGTGTCAGAGGGATATGGTGGTGCCATGGTGTGGGCACTACCTCTTGATGATTTCAGGCAGACATGTTCTAAAAGTAATCGTAAATTCCCTCTTCTAAATACAATTAAGGATGGACTTATTATTGCGGAGAATGGTGGGACACT…
>GalT_650
ATCTTTATCATATTACATAGCAGAATCCACAGAATACAAGAGAGTATGTTACTACACTAATTGGTCGCAGTACAGACTTGGCAATGGGAAGTTCCTCCCCAGCGATATAGATCCTTCCTTGTGTACACATATCATCTATGCATTTGGCAAACTCAATGGCAACTTAGTACAGAAACTAGAGTACAATGACTATGAACTATATTCGCAGCTAAATAATTTGAAACGACAAAATCCAGCAATTAAAAACATTACTAGCCCTAGGTGGATGGACCGCTGGCAGTGTAGTATATTCTCAGATGGTCAGCGCCCAAGATTCAAGGGCAGAATTTATTAGTTCAGCCATACAGTACCTGAGGAAATATAATTTTGATGGATTAGATATAGACTGGGAGTATCCGG…
>GalT_662
ATTAAGAACGCCATCATTAATTTGATAAATAGCTCCACCGTAACTGCAAGTACCTGGACAATATGGACATGCTCCATGGCTAGGAACTAAAGGTTTCCCGCATTGTGTGGCAGGACACTCAACCTCTCTACAGTACACATACTTTCCACTTGTTAGGCAATATCTATCTCCATTCAGCGCAGGTTTGCTTTCTCCAACAGCATACTTTATACACTTTCCATATTTTTCTTTTCCGAAAGATACTCCAATAAGACTGAACACGAACATGGCAGTAAATACCAACACAGGGAACACTCTACACTGTAACATTTTGGAATTTCAGTTTCTTATCTATTACGAC
>GalT_690
CTGATTGACCAGCAATCACCTGGTTTCTACAGTGATTCACTAACACCAGCAAGGGTGGATTTTAGTACAGAATACTCTTTGAATGAACTGCACATGTTGCAGTTCTTTTTGTCTGGTCTGAAAATCATTCAAATTAAATGAAGAAAATTATGCACTAAGCAGCACTATTGTTTTTTTTTGGCCAACTTAAAGGCTATGCTATTTTGTGAAAATCAATGTTCACTTCAAATGTTTAAATGAACCATGTAATTGTTTGGATTGAACATGTAACCTTCACCTTGTAACTTGAGACCAGATTTTGATGGAAAACAAAAAGAACCCTATCACAATAATAGTGTTAATAATAAATAATTAAAATAGTATGATCCTAAATTGAGTCACTTTTATAATTCGTCTTTC…
>GalT_705
CAAAATCACGGGTGTCACTCCTAACCAAGTGGATGCTTCTCGAATGTTAAACCTTTTCAGTTCCTGGGTCAAGTCACAAAGTAGTAGTATACCAGGGCATGACCACGCTATGTTATTTACTGGGTATGAGATGATTAAGGACGGATCAGCATCAATAGCTGGTTTTGTCTTTTACTGGTGCCTTATGCCAAGCAAACAGCCAATCGATTGTAGAAGACAAGTTCAACTTTGGTATATTAACCGTGGCAGCACATGAGCTTGGACACAGTTTGAGCGCACTACACGATGGGAATAACAATTTTTGTTAGAGCCAGTGATGCGTTCATTATGACTGCCACCAGCCAACCTCAATCCAATCCTCTTACGGCAAGCAATCCCTGGAAATTTTCGTCATGTTCT…
>GalT_710
GTACAATAGAGGGGTAATTACAGGATAAAATACTAGCAGTATATTATAAACAATTTTATTAAACAATAATCAATAACAAAACCAGCATCAACGATAAACTAGATAGAGTTCCTATGAGTGTGTTTGCATTGTTCTCTGTGCTTGCTTGAACGACTTGTTCTGCGGCTTGTCTTAAACCTGTTGTACATCTTCTACAAGACTTTGCACATCGTTTCAACATGAACCCTGGATTTATGACACAATGTTGATGTTCTGCCCAGATTGGACACATTTCGGGACTTGTCCATGTGTCTTTACAATTATTCATGACTTGTTTTTTCTGTCACACCAACTCCACCATCATTGTCCTGGCATACCTTACAGGAAAGCATACAATTAGCTTCCATAAAAGTTGGATTT…
>GalT_718
GTCCAGTAGATATTTTCTATTATCTAGAAGATGATAGTATATCAGTTGTCGAGCCACATGTAGAAAACTCAGGAATGCCACAAGGAAAACTGATAAAGAGACAGAGGCTACCAAAGAATGACCAGGGAGACAATTGGCATTGGAAGGATTTGAACAATGGAATTAATGTCACATTTTACGGGAAAATATTCCGCATTGTCAACTGTGACCAATTCACCACGAATTTCCTAGAAAGTGAAGGTTTAGATGTGAACCCAGGAGAGAATCTACCCTCAGATCCATACATTGATAGAAGGAAGGAAAAAGCTGCACTCAGAACTTACACCACTGCCTCAGCATTTGATGCCAAGAAACAATTCTTGGAACTTGACAGAAAAGTCCTACGATTGTATGTTGTTT…
>GalT_723
GAGATCGTCAGCCTCCTACAGCAGACCCAGACAAGAGGAAACTTATTCAGCAACAATTAGTGCTATTGTTACATGCTCACAAGTGCCAACGAAGACAACAGAATAATGGAGAAACATGTGGACTTCCACATTGTAAAACCATGAAAAATGTTCTTAATCACATGACAACTTGTAATGCTGGCAAATCATGCCAAGTTGCTCACTGTGCATCATCACGTCAGATAATTACACATTGGAAAAACTGTACAAGGAGTGATTGTCCAGTTTGTCTTCCACTGAAGAATGCCTCAGACCAGAAAAGACCAGGTGGGGCAGCGAGGGGCTTCAAATGTCCCGGGTAGTGTTTTAACAGCTCCACAAGGAAGTTCTACTGCTGCTGCTGCTGCTGCTGTTGCTGCT…
>GalT_729
ATTAAATACAACATCAAATGTCCCAGTCTTATGACCATCGCCATTAAGGTAACTTCTTGTCATCTTCAATCCATTTTGACAAAGGTACAAATTCAGATCATGTCCATTAGTTGACATAAAAACGGCAGTCAAGTGATAAAGACCCGAATGTGGAGCTGTGAATATTCCAGTACTTGGTTCATATCCATTTCCTACATTTGACCATACTCTATCAAATATCACTTTTTCCCTGCTTGACAACGTTTGTGAACTTGGCCGGTAAGCTGAGAACGCAACTGTTTCTCTTTTCGCCAGCATCTCGTTGAAATCTTTCTGTTGTTGTAAAATCAATTCCTGCAATGTCTTATTAGATTGAACTTTGAAGTGTTGCACTATCACATCATGTGCAGTATTAAACCG…
>GalT_730
CTTTATTTCAAATTCTCTGAGGAGATCAAGATGTCCAGCTTTGTCGTCTTCTCGAAAGCGGGAAATGGCTGGCGCTCCTAACAAATCTTCCAAGAATGCCTCGAAAGCTTCGTCCACTTTGGTCCCACCCCAATCACCGCCATTGGCCATATACAGTTGTTTGATAGTACCGTCAGTTTGTACTTCCTGGACAGTAATATCAATTGTACCACCTCCAGCATCCAGAATAAGGTATTTAGTTCCTGGAGAAAAGGCATCTAGAGTTGATTTCCCGCCACAAACCATTCTCTCACTAGGGATATGTTTGCAGTAGATAGAAGCTGCTTCTGGTTCAAGGGCCAGCATTAACTGACTGTTAGGTATGCCTCCCTTAACAGCTGCCTCTCTCATAAATTGTTT…
>GalT_774
GAGAATTCAAAGACCGCTGTTATTTCTTTTCCTACTGACAAAAAAACCTTAGGCATGAGGCGGAGGGTACAGTGTCGAAATACTAGGAGGGTATCTAACACAAGTTACTGATTCGACAGAAAATTCCTGGATTGTTTCTTTGATTACGAAGAAAAAAAGTGATTCAGCAGGACTACTGGATGGGTGCAACAGATTTTACAGAGGGTGATTGGAGATGGGTGAATGATTTGTCTAAAGTACATTATACCAATTGGAACTCAGGTCAACCTGATAATTATCATGGCAAGGAGGACTGTGGTCATTTTTGGCATGGAAATACTTATAAATGGAATGACCATGTGTGCAGCAATCTATTTGGGTATATTTGTGAGAGTCCTCAGGGATCTAGTTGTCTTCCGT…
>GalT_775
GCTTCTTTTATTCAAGTGGAGAACAAATCAAGATGGTGAACATGTTTATTCTGTTTTTGTATGATTGCATCTGCTGGCGCAGTAAGTTGGCCATAGTGGAAGAGTATTCGATTCCGAAACCAAAAAACTGGATGTCCATTTGGATGGGCTGAAGGATGGAGGTACCAGGACAATGAAGATACCCATAATATTAACTCTGTTACCCCAAGTACAGGCCACCACTTCTACGGTACTTTTAATACAAACACAAAGATGTATTACTGTACAAAAACAACATACAGTGGATCAGGATCATGGCCAAGAGGAAATTATTGTATTGCCAGAAAAGGTGGTTCCTGTCCTTCAGGATTTACTCTAACCGGCTTTATCTACTGGGACGACGAGGATAACGCAAATGCT…
>GalT_777
ATTTTTACTGCATTGGATGTGTTTGAGAATGATATTTATGTAACAGATCAGAAATCAGGTTCATTATTCAAGATGAGCAAATTTGGAGGAAACAAACCAGAAGTTGTATTGAATGGAATTAATATGCCATCTTGTATCAGAGTTATCCACCCTTTGTTACAGAAGCATGATAAGAATGTTTGTCAGCCTTTGCATTGTTCACAGCTATGTTTGTTGACCGTGGATGGAGCAGAATGCTCATGTTTTGATGGTTATCTGTTACATAACAAGACACAATGTATAGATATAAGAGAGAAATCTGTTACAAAACTTGACTCCTCGAAGGGGAGATAATTAAGCTTGTCAGATCATCAACAAAGCAACCAACAACACCATCAGTCTTAGTGTCAACTGTTAGGG…
>GalT_778
AAAGTGCATATACACCAGCAAATGGAAACGAATTCTGATCCTAAGTCTGTAGCCCCAGATAGGCTTCTTCGCCGTAAACGTGACTACTACGGACACTGCACTTCCGTGAGCACACTATTTACCGTCGACGGAGGCGGTAATACTGTATATTTGGACCGTCAGAGCCCAAACTGTGGGCTAACAGCTATGAGATCATTCCATTTGGTACGAAACAGAGCCGGAAACCATGTCAGATATGATTTAAGTTGTTGCAGTCTACCTCGTGATTTCAGATGTACAACCGAATCACGACACACGATGTTCAATTTTGATGGGAAAGGCAAAGTGGTATATTTGGATCGTCATCACGTAGTCTGTCCCTATAACGGATTTTTAAAGCAGTTACACCTTAACCGCAAT…
>GalT_793
AATCTCTGAGCCAATGACTGCTATCTTAGCTAACTCATACACTGAAAGAAGAACGTCATTACAGTGGTAGTCAGGATGATTACGTGTCCAATGATCGTCATTTTCATGGCCATGTCTTTGCCCTTCATAGCGTGCAGTTCACAGTCATGTGTTATGGACATATTAGATGATTTTGAACAAATGAAAGTGGACGTGGCAAGGTCTAAAGCAGTCAAGACAGCATTTTTTGCTGCACTTACTCCGCATTTTACATTAACTGGAATAAATGCGGTATTGAAATTCGATGATGTCAGAGTGAACAGAGGTAAAGCATATAACCCATCAACAGGTGTGTTTACAGCGAGGGTTCCAGGACTATACCATTTTTCATGTATGATTTTGGCAAATCATAATGCCGTA…
>GalT_810
CTTTTATTGCACACATCCGGCCCTGATTATCACTGCACGGCTAGACTTGACAGTTCTAGATCGAAGTCAGTTTCTATCGTTTCTCCTTAATATTATTATTCATTTACAGGCTTAAGTACACAGCCGCAGGCTGCTATTTGGCTATATAAAGTGGCTATCTATGCTATAAAGTAAAGAAGTTTGATAGAAGAAGAAAAAGATAGATATCACAACATATATTTGTTTACAATTCTACAAAAATAAGAATAGTCACAAGCACGCGTATGGAAAACATTCTTGTAAAACATTTTGATGATCATGTGGAATTGAGTTATGCAAATGATTTAATTTATTAACGATTCCTAATGTGGGAAATGTTTATAAATCTTCGTCACTTGCAGCTTGAGCCTCTGTTAATTC…
>GalT_813
GACGTAAAAGAGGAGGATCGTCCGAAGGAGGCAACTCTGAGGAAGAGAATACACTAAATCAGCTGTTAGTAGAAATGGATGGTATGGGAACTGTTGAGGGAGTAATTATGTTGGCTTCCACAAACAGATCAGATGTATTAGACAACGCTTTACTACGACCAGGTAGATTTGATAGACAGTATTTTTAATAGTACTTTTCCCCTACACTAATTGAAAAGGAAGGAAATGTTTGATATATACTTAAAGAATCTTAAACTGTCAGAGTCCTCAGAAGAATTCTTTGGCATACAAACTTGCTCAATTGACTCCTCGAATGACTGGTGCTGACATTGCTAACATCTGTAATGAAAGCAGTCTTTACATGCAGCCAGAAG
>GalT_814
GATGACACAGATTATGTTCGAAACCTTCAACTCTCCAGCTATGTACGTTGCTATCCAGGCTGTATTATCTTTATACGCTTCTGGTCGTACTACTGGTATTGTGTTGGACTCTGGTGATGGTGTTACCCATACCGTACCCATCTATGAAGGTTATGCACTTCCTCATGCTATTATGAGATTGGATCTTGCCGGTCGGGATCTGACAGACTATCTTATGAAAATTCTCACAGAGCGTGGATATTCATTCACAACCACAGCC
>GalT_815
TAGAACTACCGTCGTAGCACCACGAAGAACATCCCGTTTTACCTTGACAGAAGCGCCACTCAACCCCAAACGCCAACAGAGAAAAGAATGACACAGATTATGTTTGAAACCTTTAACTCCCCACGCTATGTACGTTGCTATCCAGGCCGTATTATCTTTATACGCTTCTGGTCGTACAACTGGTATTGTGTTGGACTCTGGTGATGGTGTTTCACATACCGTACCAATCTACGAAGGATATGCACTCCCTCATGCTATCATGAGATTGGATCTTGCCGGTCGGGATCTCACAGACTATCTTATGAAA
>GalT_816
CTGACAGAAGCGCCACTCAACCCCAAAGCCAACAGAGAAAAGATGACACAGATTATGTTTGAAACCTTTAACTCCCCACGCTATGTACGTTGCTATCCAGGCCGTATTATCTTTATACGCTTCTGGTCGTACAACTGGTATTGTGTTGGACTCTGGTGATGGTGTTTCACATACCGTACCAATCTACGAAGGATATGCACTCCCTCATGCTATCATGAGATTGGATCTTGCCGGTCGGGATCTCACAGACTATCTTATAGAAAATTCTCACAGA
>GalT_817
CGACATCCGAGCTGATGACCTTGATAGAGAAGCTCAATCAGTAATTCCACTGCAGTACGGTACAAACAGGGGTTCCAGCCAGAAAGGAATGACAAGCTTTGGGAGTCAGAGGCATATTGCAGACATCAAAGTGTCAGATTTAGCAGAAGACATGAAACGTCAAGATTTAAATATGACACCAAAGGAATACCAAGAATTCCGTCAACAAATGGAAGCAACGGAACAAAAGACCGATGAACCACAATACGAATAGAATCACCTCAGACTATCTCATCGCTCAGTGACATTCAAAAGACCTTTAAACGACGTCGTTTTAAATTGAGAAATGCATGGAACAAAATTTCA
>GalT_829
GTTTCAGTAAGAGGTCATTTGTAGGACTTTGTCCCGTTTTCAATAAAAAGTCGTCTGTCTGACATTTTCGTACTTTTATCAAGTCTTTAGTTGGACTTTGTCGAGATTTTGCTCTAAATAAATATGCATATTTGCGTCGGTCTGCTTCTTGCATAGCATGCAGTCGAATCTGGTTCATTCTTTCCTCCATTTTTTCCAGACGGGTATTTTGTTCGTTCTGGAGTTTTGTAAGTGCAGGATGGTCGTCAACTTTAATGTCTTTGTACGAAATATGTGCAGCTTTAAGTAGCGGTGATCCTTCTCGAGAATCATGGGTAATAGGCATTGTCAACCTACTTTTTTGTGTCTTGTTTTTGTTGAATGGTCAATGAACTCTGTAGAAAAGGTTCGCTATAATGA…
>GalT_875
GGTTCATATACTTTGGGATCAGTCTTTTACATCACAGAACCAATCGGTTATACTTGCAAAAATAATGCTACCTTTATTTCTTAAGTGCCTGCTTTATTGCTCTAACTTTTGGTAGCAGACATTAAAGACGAAAATAGGTGTGTTAGTGTTGACAACAGCAAATAATCGAAGATGCTCTGAAAGAAAACCCCAACCATCTTGATTGAGTTTTATTGCCCCACTGGTGTGGCCATTGTAAAGACTTTAGTTACCAGAGTATGAGAAGGCAGCCAAAGACATTAGCTGATGAAGGCTCAGACATAAAGTTAGCCAAGGTTGATGCTACTGTCGAGACTTCACTTGGAGAAAAATAATGAAGTCCGAGGCTACCCTACCCATCAAATTCTTCAGATCAGGAAC…
>GalT_881
GACGGTTCGATCGTTAAAAGATGAATTTGTGTTGCGCTGTATTACTCCTACAAACATTTTCTTTGTTATGGGGGTATAGTTTAACCTATATGTTCTTGAATCCAAGTGTTGCTAAATTAGATTCTTCATATTGTAAACATATAGCAAAAAATGGTGTGGTCACGAGCGATGATTGTGCAACATCGGTTGATTGTAGAGGGACTGCTCGTGTCTATTCCTGTCGACATAGGAATGATTTACAGCTTTCTGGTTCGTCGTGTGTAATGACCACTAGCTATGAATGTTTACGGAAATTACAAAGAAGACAGCAGGCATGTTCCAAGAGGACATCGGGTTTACTTCCGGATTCTAAATTTTGTCATCTGTATTACGATTGTTCTAACCCTGCTAAATCGAAGA…
>GalT_885
ATTTTGTATGATAAACAAATCTTTGTCTCGTCATACGGAACACATACATAATCATTATATCTTTGAGATTAATCCTTTAAACTTAGAAGGTCTTAACTGGGGAAGAGGCTTACGTTTGATAAAGGAACCCACATTACATGCCATATTTGTAATTCGATGTCTGAATGACGATGTATTAAGTTCTTTGAAATTTTGCACCATTAAGGACAATTTCTGAGCAGCTCTTTTCCTGCCATAAGATGCTATACCGTGAACTTCAGCCCAGTCAATACCATACCCAATTCCAACAGAAAATATTTTAACTCCAGCATACTTCAAATTTCTAGCTGCGGTCAAAGTTTTACTTTTATGCTGAGATTTTCCGTCCGTAAGGACAATGGCAATTCGTGGTACACCAGA…
>GalT_909
CTTGTATGTACAGTGTCCGCTGTTCCTTTCCAAACAAATGTTTATTGGGAGAAGGATGGCTTTGCTCAGATCATTTCTGGAGACAATGGGTATTCTGGTAGTACAACCAACAATCCTTCTTTAACCATTAACTCTGTGACAACAAGTGACCAGGGGACATACAGATGCTATGCTACAAATATTGTAGGAACCGGTCAAAGTTCAACCACACAACTTACAGTTTCAGGAGGATTACTCTCTGTGACCATTGATCAGCCATCTTTATCTGCTGTTCTGGGAAGTAACAGTGTCACAATAGGCTGCACTGTAACTGGACAACCCTCCAGCATCTTCAGTATCCTGGAACAAAGAACTCCGGAGGTCAAAACACAAATATCAACATCGGCAGTAGCGGAAAAT…
>GalT_910
ATAAGCATATACACGTAGAGGGTAGTAGCTGAAAAGTACGATTGCCCAATTGCAGTGGGAAGCAAAGCAGGCATCTCCACAGAAAGACGATTTAGTACGTAGATATCTGGAAGAAAAAGAACAATCCGACATCTAAATCAGGGCAGGCATACAGAGAACTTAAACGGGAATTAAACATGTTTCGACATTATCATTTTAATGTAAAATATGTCATGAATGACTTCGAGCCATTTTATCGTATGATGTATTGGCGCTTCCAAGAATATATGAAATTTGCTTTGTATAAATATGGTGAATTTTATATGCCGAAGGAAACGGCTGATAAAATTGAGTTTATGTTTGATCTGCACAGAAATAATAAACAGATGGACA
>GalT_920
GGATTTTCTTGATCAAAAATATGTACTTTTTCTCCCTCTAATGTGACTTTCATACTTCTGTATTGAATTACAAGTTTGTTCAAACAAAATATGTCTTCCTTCATATTTGGGCATCTTGCTGTTGACATTTCAATGTTGAGATCGGATCTTGGGTCATCGGTAACCCCTGGAATAGGCATAACCACACTAAATGTACAACTTTGACTAGCGGGGGCGAATGAATACTGATAGTTGTCGAACGTTGTAACATGATTTAAACCAACTATCTCGCACATCTCTGAACATTTATCTTCTGTACATTGCCATCTTCCATAAGTACATTTGCATGCATTACATCCGTTCTTTATGGTTTCTCCATTGTTGTATCGTTTACGGTTGAATTCACATTGACACTGTTCT…
>GalT_921
AGCCTGGAAAAATGCGGGTAAAGAAGTTGGACTTCAGATCTGGAGGATAGTTAAATTTAAAGTCACCAACTGGGCTAAGGATGAATACGGTAGCTTTTATAATGGAGACTCGTATATCATACTTAATACTTATAAAACAAAGATTCAGATAAACTCTTATATGATGTCCATTTTTGGATTGGGAAATACAGTACTCAGGATGAATATGGAACTGCAGCCTATAAAACCGTAGAATTAGATACCTTACTAGATGGTGTACCCATTCAACACCGAGAAGTTCAAAGTAATGAATCATCCATGTTTAAAGGCTACTTTCCATCAATAACTCTGATGGAAGGTGGAGCAGAAACTGGATTCAGAAGCGCACAAAAACAAGCAGAAATCAAACACCTACTTCAT…
>GalT_935
ATATCTGCCTCCCTGATCATCTCATCTACCTCTTCGTCTGTTAATTTTCTCCAAGATTTGTCATCACGTGTCTAAGTTCAGCTGCACTGATGAATCCATTACCGTCTTTATCAAAAACTTTGAATGCTTCTCGTAACTCATCCTCATTGTCACAATCCTTCATTTTCCTGGCCATCATTGTCAAGAATTCTGGGAAATCTATTGTTCCATTTCCATCAGCATCTACTTCGTTAATCATGTCTTGTAGTTCTGCCTCTGTTGGATTTTGTCCGAGAGATCTCATGACTGTTCCTAGTTCTTTTGTGGTAATGGTACCGTCGCCATCTTTTGTCGAACAGACTGAAAGCCTACTTTAAACTCAGCAACTTGTTCTTCTGTACAGCTGATCAGCCATGTTGT…
>GalT_936
GTCATCATTTTCACAAATTCTTCGTAGTTGACCTGACCGTCTCCGTCTAGATCGGCCTCTCGGATCATCTCATCAACTTCTTCATCTGTTAATTTTTCACCTAGATTTGTCATCACATGTCGAAGTTCAGCTGCACTTATAAAACCATTGCCGTCCTTATCAAATACTCTGAATGCTTCTCTGATTTCTTCCTCACAATCACTGTCCGTTCCATTTTCCGAGCCCATCATAGTCAAAAACTCTGGAAAGTCTATTGTTCCATTACCATCAGCATCAACTTCATTGATCATATCTTGAAGTTCAGCTTCTGTTGGATTCTGTCCCAATGACCTCATAACTGTACCAAGTTCTTTTGTGGTAATGGTTCCATCACCATCTTTATCAAACAAGCTGAAAGCT…
>GalT_942
GACATTGGAAAAGAACGGGTCAAGTACAACAGGGTGATTTAAAATTACAGAGGATGTTTTCTATATTGGATATACAAGATGAACTATTTGTATGGATCGGAAGTGCTACTACATATGCTGAACGCAAAAATAGCCATGACCTATGCACATAACTATTTAATGAAAACAGATCATCCATTGGTACCTGTTAGCTGTCTTAATGAAGGAAAGACAACAAAAGCGTTCCACTCTGCAATTGCTGCATAAACAATCAAAACTTGTATTGTATATCTTCATCTATATAAACATATGTATATGTATATCTTCATCTTTAAGTGAATTGTGTATAACATACAGGGTGGGTTTCAAGAAGTTTATAAACTTGTAAAGTTTTCGAATTATTTATTCAACTCTGA
>GalT_944
ATCACTGACTGTATGATGCTGATGTTACATATCCTTTGTTTAATATGCACACTAAATCTTGTGGTTGGATGCAGATGGGTTAACAAGTATGATAAACCTGTCGATTTTTCGTGTCCACATGGACAAGCCATTTCTTTCATCCACAGTGTACATCACAACCTATTTTGAAGATCGTAAGATGGGTGTTTAGGGTGTAGACATACTGGTGGACGACACATCAATTGTTACTGGACTCCTCATTATGTGAATGACTGGGATAAATTCTTCAGCTTTCAATGCAACAATTATGGATTCATAGTTGGTATGCAGAGCATCCATCACAA
>GalT_953
GGTTTGCTGTCGTTGTGACAGCCTCTTGTTTTACGCTGATCCAGTAAATCTAGAAAAGCGCGTTGGACGCCCGAAATTAATAAAGTGTTTCTCTCATTTACTAGATAAAGCCGTAAGTGTTTTATTTCTTAACTAGTGTACCTTCTGTCAATAGTTTTTCCTTTATTTCCCATGCAAACATTGTTGGGTGTTCCATTTTGTACCTTTCAATCCTGGATATTACCATTGGTGTCGCCACTTTTGGTTTGCTTCCTCCTATGACATTTTTC
>GalT_954
TTTGCTAGATAAATCAGCATAGTGCTTCTGCATAAATTCCTTGGATGGCTGAACTAATTTACATGCAACCAGTTTATAGCCTCTATTGTTAAATCTTTTGATGATTTCGCCAGTTAACCCTCTTTGAACACCATCAGGTTTAACCATGATGAAAGATCTTTCGTTGTTGGCAGCCATTTCTGATGAAAATTGTGAGAAAATGGCTAAGAGGGTAGCAACCATG
>GalT_971
AGGAGATTTTGGATTTGATGGTAGGCCAGGGTTACCAGGGGAACCTGGAGCACAAGGTCGTAATGGTTTTCGTGGGCCAAAAGGTCAAGAGGGTTCAAAAGGACTTAAGGGAGTTACAGGAGAGACTGGTCCAGCTCCAATTGTAAACCCTGGTGATGGACCAAGAGGACAGAAAGGAGAATCTGGATTCCCTGGTCAAGCAGGAAATGATGGCCGTAGGGGACTTCCTGGTGATGAAGGTCCTAGAGGTAATGCTGGGTTCCCTGGTCAGACAGGAGAGCCAGGTATTCCTGGACCAAAAGGTGAAATAGGTAATCCTGGTCCTGATGGCTTTTCTGGACAGCCTGGACGAGGAGGAATTGACGGAATACCTGGACGTCCAGGGGCAGATGGACCAAA…
>GalT_977
GGGAAATCCTGTGCCAAAATAGGCTCCATCAGTGTGATGATGTCGTGAAGACTTGGGTGTGTAAACATCTTGACATTTTGGACAATACAATTTCACCATTGCTTCACCTGGTACATCTGACAAACCTATAGGTAACATTGGTTGATTTTCACAATATACTCTTGGACAATAACCAAAGTCTCCTTGTTGCCACTTTTCAATCATTTGTGCAATTCCTCTGTTTGTTCATGATGTATCTGGCATGAATCAACCCACTATAACATTTCTGCTGCTTGTTCAATCAAATCACTCTGATTAGGGTTATCTTCAAGTTCATCATCTGGTTCAAGGTCGAGGATCATATCTAGAGCCTGTCTGTAATGTGGAACTTGTTCATTCAGTCCTGTCAAGTTGAACTTA…
>GalT_978
GTTTGATATGTGTTACTGTCTTCATCCAGTACTGCTGTGTCGGAATTAACATTGTATTTTGACTCCTCACTTTCAATGACGCCATTGATAGAATGGGGAAGGATTGGTTTCTACATTGTATGACTGCGAATTGTCACGTCTGCGTAATGTTATATTATACATAACATATGGATATGCTTCTGGACAACATGCATACATCTGTACGGCTTTATATGCTGTGGAATTTACATATTCCCATTCAGGATGTTCAATATAATCTTCAGTGTCAACAAAAGTCTGAGGATAGCACAATGTCTAGTGCCCTACCCATGATATGACCAAGAACCAAAATCGCATCAGGACAAAATAATAACTGTGTTATCTATTTCGCTCCCTTCACAATTAGTAGTTATGGTAGTA…
>GalT_990
CTTTAGGGTTGAGTGGAGCCTCTGTAAGTAAAACGGGATGTTCTTCTGGTGCAACACGGAGTTCATTATAGAAAGTGTGATGCCAGATCTTCTCCATATCGTCCCAGTTTGTTACAATTCCGTGTTCAATAGGATATTTCAGTGTGAGAATTCCTCTTTTGCTCTGGGCTTCATCACCAACGTAGCTATCTTTCTG
>GalT_1009
GTTTAATCTTAATATAAATATAGGTTTCTCGTCAGCACTAAGTCTTTCGTCGGAGGAGACACATCAGCACAATCATGTGACGTCACAACCTTTGTAGTGCCAACAACGACACTTATTAAAATCTTCAACACTTCTTTCATAAATGTTTAGAAGAATCTTGAATACTTGTGCCTCCTTCTTGAACGCGATCGTTTTGTTTTTATTGATTTAGTGTTTGGAATTCCTTCACATATAAACCTTTTGGTGGTTGTATCACATCGTTTATTTCGCCAGGTTTGGTTTTTGCCAACTTGGACACAATGTTTATTCACGTTTCGACCACGTGTATTTGGTTGTTTTCTCCCCCAGTTGGCAAAAGTGCCATCGCCGTACGGCTCGTTATTGAGGTACTTCCAAGCC…
>GalT_1039
CTTGAAATATGTATGCGATGGTCCATCACAGATGTTAACAATACCTACAGATGGAGACATATTATTAACACACTCCACATCAGATCCTCTATCACCTAATATGACATGTGTTGTGTCTATTTACAATCCTATGACAAAGTATCCTGGGAGAGTCTTGGCATATTTTGAAAGTTTTTCTACAGATGAAAGTAAAAAATTAGTGTCAATTCTCGTTTGGTATATTTATTGATGAACGAGGAACAAGTGTAAATAAAGCTCTTACAGGTCCAAATGGTGTTTGTGGTAATAGAGATAATCTTGACATATATTATAATTCTACACAGCAATACATGACCTTCAGGTTTAAAGATGTAAACCAAACATCAAATTTCAGAGTCGTGTTAACAGCAGCGCATACAG…
>GalT_1041
TTGCCTTGTTACAAATCATTTCCCATTCAGATTTACGTTTACTCAAATTCTTCCCTAGGAAAGCCACAACAATGGCTGTACACCAAATATTACCCTTGTATTTAGCTTCCAGTTCCTTTTGGGTAATATTAAGCACTAATTCCAGCTCAGATGATTGCGACCAGGAACCATCAAAGTTTTGCAGTGACACAATGACCATCATTTTATCTCCTGATGATTTTGTTTTTTCTACTCTTTTTCAAATTATGAGATCTATCATTGCCTCCTAATGCTATGTCTTGATATCTAACCGCCCCTCTGGATCTAACAGGTGACATATCAATATATACATCTGATGATTCTAAATCTTCATAGGTATCCATGCTGTCACAAACAAACTCACTTTTTTCTATTGATTTT…
>GalT_1045
CTATGTCAGCTGTAAAGAAGTTGAACAGTCCTCAGTGGAAGAATTTCCAGCCGTCCACACAAGATCCTGCAATCGTATCATTTCAAAGAGCCACAGCACCAGTGATCAATTCACACATCAACAGTAATGGAGGAGGGAGGGAAACAGGATTTATTGAGAAACTTTTGCATTCCTATGGATTTATTCAGTGTTGTGAAAGGGATTCACGACTTTTCTTTCATTTTAGTGAATATGGAGATGATATAAACTTGGTTAAAATTGGAGATCCGGTAGAGTTCCAGATGACCTATGATCGTAGGACTGGTAAACCAGTAGCAAGCCATATTGTATTGTTAAACTCTGGAAGTCAATCTTATGAAGTTTTGAGTGAGGAGAAGTTTACAGGATCTATTGCACAAG…
>GalT_1046
GCAGTTAGAGAGCTACGTCATCAAATTTTTTAAACGTTAGTCAAGTAGTCTGCAATTCAAACCTTCCGCCATTTTGAGGCACTACTGCTAGCTCGCTCCTGCTTTTTTTAAACTAGGGGAAGAGAGTCGGTAGTCGCTTAAAAGCGGCAGAAAGCAGGAACGGACACTGGACAAGCCTTTGACAGGCTTTACGCTGAATGGAAAGATCCTGAAATGATTTAAGACGAAGAAAAAGGCAAAAGTTTTATTCCTGAAAATCATATGACAGGGATTGTGTCCAGGACTATGCGAAAATCTTTACATTCATATAGTTTTTCCGCTTCCAATTTCTTAAAGCGGAGTTCATTGATATTATCGCCAAACATGGAACTAGTTTTTATTTCAATTCTTTGTATAATT…
>GalT_1066
TTAACTAGCCAAACAATTTTATTACGTATGACGTGAATACAGAATTATTTTTTTTCATAAAATTGGCTCTTTGTGTTGAAGTTTTAAGACTCTCCAAATCCCAAATTATGGAAAACCACGTTATACTGAATCGAAGTACTCATAAAATTGGCTATTTGTTTCAAGTCTTCAACCTCTTGAACCACGATCAACCAAGTTGCATATTTTCCAGCTGTATTCTCGATCTTCGAAGTAGTTGGAATGTCTGCTGGAAACACCTTTTACAACGGAACCTTCTGGTACCCTTACTGTATTGGGTTTGTCAAAGTTATTCTTCATAGTATTTTCACATTGTCTAACTTCCTTTCCAGAAATTCCACAACATTTAAACATGAATCTTCTGTCCTCTCTTCCGTTGTC…
>GalT_1069
GTTCATTTCAAATCTTTGAGCTTCACCAACATTCACCACAAATTTTACACCACCAGCATTGTTCAGTTCTAAGGATATGTATTCTCCATTGGGTGACTGGATCTGCATCAGAATTCCCTGTTTTGTCTTAGTAGTGAAGCCAACTTTCACGTCTTTGAAGTCAGTTGTTGAAAGACCTTGACTTTTATCAAATTCATATCTGATCATAAAATGTTTCTGTAAATTCACACCCACCTCTCTACCACACATCCATCCTCTCCATGGTGTGTAGGAACAGTCACATGTGTAGCCAGAGTATCCTTCTATACAGGTACCACCATTAAAGCAAGGATTACTGCTACATTTACCAATACATCCCTCAGTAACACCATAAGATACCTGTCCACGTGAGATCAGGCC…
>GalT_1081
TTTAGTTTCAGATCAGTCAAAGAATATGAGTCTACAGTTAAGCTTATTTATGTTGGTTGTATTGTATTTATCATCTGCTGCCAGCTCTTGCCAAAGAATAAACAATGACGAATTCGAAGATTTGACGAATGTCATGAGGAAGATAACGTGTCAATCAGGAGGAATCTCCGAAAAACCGGCGTTCCTTGCAACCTTAACTCCAAGAGAAGTGGCATTAACATCAGGCAGCGTAGTTAAATTTGATTCTATTTTAACAAACATCGGGAATGGATACAACGCAAATTCCGGAGTGTTTACGGCTCCACGTAAAGGGACATACCAATTCGCAGTGAGTTTTGTTTCTGGTCATAGAAACAACGCAGTGCTTGAACTGACCCTGGCAAAAATAAACAATCGACT…
>GalT_1091
GTTTTATTCAATTATAACATATTTGTATGGATTTCTTCAATCGAATGCATAAATGACAGGTATTTAGTCTAGCCTAAGAATGACGAAGGCACATTTCATCAATTAAAAAAAGTAGCAAATACATTGCAACTGCTTTACAATACAAAATTTAATGGCCGTTATCATAAATATTATTTGTTATGAACTGTTATATTGCTAAAGAACAATCCACATGTCTCACAGAATGGCGCAACGCAACAGTTCATTATGATTCCAAGAAATTTCTGGCATGCCCCAGCAAATATTGCAAAGCATCTCATATATGGTGTCCAGCACCATACATGCTCAAAGGTTAAGCACGCAAAGGTACATCCCCAATACAGAGCAATACACAATCCACATAGCAAGGTGAGTAACTTG…
>GalT_1108
GTCGGTGGATTAGAAACTGAAGAGGACTATCCATACACAGCCAAGCAACATAAATGTGATTTTGATGCCAGTGAGACTGTTGCCTCGGATACTGGATTTGTTGATGTAGAAAGTGGAAGTGAATCTGATCTCAAGAAAGCTTCAGCTTCAGTTGGTCCTATTTCTGTGGCTATAGATGCCAGCCATCAGTCATTCCAACTTTACAAAGGAGGTGTATATGATGAAGAGGAATGCAGCAGTAAAAATTTAGACCATGGAGTATTATGTATAGGCTATGGTACTGATGATAGTGGAAACGATTACTGGCTCGTTAAAAATAGCTGGGGTGAAACATGGGGGTGACCAAGGATACGTGAAAATGACCAGAAATAAGGATAACCAGTGCGGTATAGCTACACA…
>GalT_1120
TTTTTTTTGAAATAATGTCTTTATTAAGGTAATTATCTTGCAGATGTCAGGAAACAATTTTTCTTTTTTTCAATCGAATGTTCGCTTCATACTTTTACATAAGGGAGGCACTTAGATCCATGTTGATTCTCGCAGATATATCCACTCGTTCCACTACAATTTAGCATCGTTCCACGTTAAAGACCGTGCGGCTGATAAAAGTGCGCACAGTCTTCATTACCGCCTCTATTGTTGGGTTCTCCTGATTTCCACCCGGAGTATTGTACTTTAGACAGATCGTTCACCCATCTCCAGTCTCCTTCCTTCAAATAATCTCCTGCTCCCATCCAGTAATCTTGTTCAACCACTTTTTTACTAGTTATCATATTCTTAATCCACGAATTTTCATTTGAATCAGTA…
>GalT_1129
GTGCTTGCCGTTTTGGTAGCAGTTAATCTGTTGCAATAGTCCCTGTTTTGGTAGAGACATTATCAAAGGCAGGTAACGAACATCTTCTCTTTAGTCCGAAGTTGGTACCTAATCTTCGATATAGAAGAGGGGTTGTTGCATTTACTTGCATGGCTGTCAAAAACAAACGAACACTAGGGACGGAATCATGCTGTGGTATATAACAAACTGTTGCTTAACAAAGGAAACGCTTACAATGCTCACACTGGTCATTTTACTGCAACTGTAAGAGGACTTTACCTTTTATCAGCTAGTATAATGGCCTCACCAAGAAAGCAAGTGGCATTGTCAATGGTCCGCAATGGTATCAACTTTGATGCTTTGTTTGGCGATTCTCGGAATGTCAACAAATATTCATCA…
>GalT_1130
CACGACGCTTTCCTTAAGGCCGAATTCGATTTAACATCACTCAATGCTGACCTTGAAAAGTTCATCCACCACGAAATCGAAAAGGAAATTCACGATGTTGAAAACCATACAGAACATAACAAGCATGAGATTGACGAACTCCATCAAGAAATTAAACATCTGCACGAGGAGGTCGAATATTTTAAATCTCACCACGTGGCATTTTCTGCTGAACTGACCCATCCTATTGAAAACATTGCCGCTGAGGAGATTGCTCATTTTGATAAAGTCAGAGTAAACTCTGGACACGCATACCATGCTGATACTGGAAAATTTGTAGCACCAGAAGAAGGCTTCTTTTATTTCAGTGTCACAATATGCACCAAGAGGGACTCCATTTTGGAAATGGCTCTTCACGTC…
>GalT_1138
GTAACTTTGTACACTCTGTGTTGTCTCTGTAAACCATTATATACCTCCACAAAACCATCTCCTAGACCCTTATCATAATCTAGCATATAAGTAGTGACCTTCGACCCATTCTCACAGGTTGCATTCCACTTGAGTGTGATAGAAGTTTTAGTTTTAGATGACAGTTTAGGAGGAACAGGAGCATCAGGTTCACAAGTACCCGTTGTAAACTGGACAGCTTTTGTAGGTTTACCCTTCAAATCTTCCAGTGAAGTACACACTCTTAGGAAGTAATCTGTAGCAGGTTTTAAATCTTTCAATGTTATTTCTGTGGCATCACCACTATACACTAGTTTATATTTTCCCTCTTTGCCTTTATCTGATAATAACAATTCATAACGAAATTCTCCAGGGTCAATC…
>GalT_1140
TCTAACCATTTAAGTGATTCTTCACAAGCTGTTGTAACAGTTTGTTTTTCCTCAGATGTCAGCTTGTCACCAGAGTCATTTGTCGCTTGTTTAACACTGAATATATAGTTCTCAAGTTGATTTCTGGATGAAACACGCTTGTTTTTGTTTTCTATCTTCGTCTTTATATTTCTCAGCATCGGAAACCATTCGATCAATGTCCTCTTTACTGAGTCTTCCTCTGTCATTGGTGATTGTAATTTTCTTTGAATTTCCACTGCTTTGGTCCTTAGCCGAAACATTTAAAAGTCCGTTTGCATCAATATCGAATTCCACTTCAATCTTCGGCACACCGCGGGGTGCTGGAGGTATACCAGTGAGATCAAACTTTCCCAAATGATTATTGTCCTTGGTCATAGC…
>GalT_1141
TTCTGAACAAAATATTGAGATTTAAACATAACATTTTACAATAAATGTTTACTGATAACAACAATAAATATTAATCGATAACATCAAATTGTAAATACAGTAGTTAAAACAATAAATTTTAACTACTGTAATTATAATACAAAGTATAGGTAATTGTCAGTTTACAAAGGGCTATGCTTTTAATCAACTTCTTCTACAGTAGGTCCATTAGATGTGCTTTGTCCTCCTGTGCTATTTGATGGTCCATTTTGAGCACCACCATGAAGTTTTGACATGACAGGCGTACATACTTTCTCTAGTTCTTTCTATTTTGTCATCGTATTCTTCTTTCTCTGCCAGAGAATTATTGTCTAACCATTTAAGTGACTCTTCGCAGGCTTTACCTAAATCCTCTTTGTC…
>GalT_1148
AAGACGTTGAGTAAAACCACAGGACGTTACATCACAGTCAAGCCAAGGACTCCTACAGTAGCAGCAGGCTTTACTGAATCACTACTCTCCTTGATTGACAGCATGTCCAAATGTAATCCATTCTTTGTGAGATGTTTGAAGCCCAACAACCACAAAGCTCCAATGTACTTTGAATCGTCAGTAGTTCTGGACCAGCTGAGATACACTGGGATGTTAGAGACAATAAAATAGAAAGATGGGATATCCAGTCAGAGTTAAGTTCCCAGCATTTATTGAGAGGTATCGATTCCTGTTACAAGGACAAAAATCAGCACCCA
>GalT_1160
ATCATCCCAGTTTGTGACGATACCATGTTCAATTGGATATTTCAAAGTGAGGATGCCCCTTTTACTTTGTGCTTCATCTCCAATGTGACAATCTTTCTGACCCATACCAACCATGACGCCCTGATGACGAGGCCGTCCAACAATGGATGGAAATACAGCTCTTGGAGCATCATCTCCGGCAAATCCAGCTTTACACATACCAGATCCATTGTCAACAACCAAAGCGGCTACTTCG
>GalT_1222
CGCCACCTTCCAATATACTAATCCTGGACTTACGTAAAGCCTCGGCTGGATCAGGATTACCAGGCATTCTCCTGATAGAAGAGACAGCATTAAGCACATTCCTCTTCTTAAAACTTTCCCTGAACGTCAATTTAACATCAGAAGCACTTCCAAATTGTACAATGCCTGCATTCATCCTACTCTTGAAAGACATCCTTTTGACCATAGATTTTATAAATCTTCTAACTTGACGTAACTGTGGTTTGGAGACATATCTTGAAGTGTCCACAGCAAATACAATATCAGCCTTGGCCTGACACCTTCTGTTACAGCTCTCTCCTGTGTATCCAGGAACACAGTCACACCTGTAACCAGAGCATCACTCTGACAA
>GalT_1230
GTAAATCGTTCTTCAGACATTGATTTAAGTTGCCTCGCTCCATATCCTACGTTTGCAGCAACTATGCTTAAACCAGAGCAACAAATCTGATCTTTAAAAATGTGATTGTATAGCACATGTCTTAACTTTCCTTTATTCGTTCTACAATGTTCTGTAATTCTGCATCATCAATTCGTTTGAAAGCATCGTCTGTAGGTGCAAATAGAGTAAATGGACCATCTCCTTCCAACATATCACCAACGTCTGCTATTTTAATCAGTTGTACCAATTCCGTAAATCTGTTGTCAAGAGCAAGAACATCCAGTAATGATCCAGCTGGAGGCATGATAACCTTGTCAACAATATGAATTATTCCATTACATGCTCTGATGTTTGATTTCTCAATGGTAGCACACTGTG…
>GalT_1231
GTCCCCTACGTAAAACTTAGTATCACATTATTATAAAGTCTGCCATACAGCGATGAAGAGAAGATGAATTTAAAATTAGTCCTAAAATCTTCTTTCCTATAACTCATCGTGGTCATGTTCATCTTTATCTTCCTCTCCAGCATCATCATCTTCTTCCTCTTCCTCATCATCACCACCTTCTTTCTTATTTTTTTCTTCTTCCTCTTTACGTTTTTTGTCTTCTTCCTCTCGTACTTTTCTTTCTTCCTCATCTTGTTTATCTTTCATGGTTCTTTTCTGCATCTTTTGTTTTTTCCCATAATTCCTTTCCTACTGCTTCAGCTTTACTTTCATCATCAGTTATTAAAATGTTGTCAAAAATGGTACCTGATTTTACCTGCCATAAATCAAATCCTACTG…
>GalT_1278
ACTATTCTTACTCGTAGAGCGACTAGTGGTAGAGGAGGCTGTTATACCAACACTGGTTCTGTTTATATTGCCCTCATATGATGCTTCATTTCTGTAGGCTAAAGCTGACCGAGAAACAGGAAGACCTTTACCAACGAGATTTTCTTGTGACTTGATATTTCTACCTTGACATTTGAGCCACTGTCTTCTTACTTGAGCTCTCACCTTTGTGTCCCCTATAACATATGCCAACAGCATGAACAATCCCTGAGCCATTACAACTACAGCATAGACATAGTATAGGGCAGTAGAATCATAGTTCACTGACAACAGTCCTATTATCCAGTTTAATCCTAGTAACAATAGCAGAAATACTCCACATAATATTCTACATCTGTGTGATGAAATGTTTGAGACATG…
>GalT_1281
TTTTTTTAAATTCTATATGGGAAAAATGATGGGGAATTAGATGGCAGATGAAAAAGCTAAAAATCAACTACATGTGGCCTATTGAGATTATTATTAGGGCTGAAATCACTGTAGCTAAAGCACCAAGTCCCATTGCAGTATAAACAAGTCCTTTCCAAATTTTATCCTCAACAGCTCCTTGCTCAGGGAAATAATCCACAAAGGCATCCCATCCTCCATTATCAAGTATCCATCTACCAAGTTTATTTGCTACATATTTTCCAGCATACAGTGAAATTCTTTCATCACAATCTGGACAGGAGTCTTTACAATGTTGTGCTAATCTTGCTGCGAATGTGTATACTGCTACTATTCTCCCCCAATTTATTTGCCCGTCTTCAAATATTTCATCGACAACTG…
>GalT_1284
ACTGTATCTGAGTTATTGCCAGCTTTGCATACTTCGTTGACACATAGATTATAAAGGAAATATGGACTTTCCAATTTATGACATTCAGAGAAAATAACCAGACTAAAATAGTTGAACAAGCTTGTTCAGCATTTTGTTTATCTTGTGTTGTTTTGCAATAATCCTGCATCACACCTGCTCCTGGGCACTGTGTGGCCTCATTAGCTACGGTCCATGTGTTTGCAGCATACACAATATTTGGTGCTGGGTCTCCAGTTCTTTGTCATTTTGTTCATTAGAAGGGTTGTCATCAAAGTCACCACAAATACCAGCAACAGATCCTGCTTGGATTCTACTTTTATCTAATGTGATATATATAGCTGAATATTTATCAACCTTCAGGCTAACTCCAATATGACA…
>GalT_1324
GTTATGACACTTTCCCCACATGCAGTGATCTGTTTGCCTATATGTACTTTCATCGGTTTGAAAATGAGGCCATGGTTAGGAATGGTGAATACACAATCAACCCAGATGGCGCTGGTGGTGTGGAATCTTTCAAGGTCACATGTCAATTCCCTAAAACAGAGATTCCAATCTTACCAGGTACTAATACCAATGGCACTGAATCTCCTGATGGCACAGACCCTATTACTAAATGTTTTGATATAAACTATGGCAATGGAATAACTAAGGAACAAGTACAGGCGCTGATTGACAACTCCAAGACATGTGTTCAGGAACTTGTGTATAACTGTGTCAATCGCCCCTGTTACAGACCGTGTACATTATGACACATGTGACGGGAACAAACAACCTAGGTTTTGC…
>GalT_1341
TTCTAATAATATTTACAATTCAAAATAAGCAGCTGTAAAATTACAAAACAATACTTCCTAGAAATTGACAAAAATATATGGTGTGTAATGTTCTACTTTATGTTGAGCAGTATATAAAAACATTTTTATTTTTTTATAAAATGAAGTATAACTTTTTGATTGGTAGCTTAAAATGAAAAATAAGTGTAATAAGAAATAAAATAGAATAGAAAGAACAAAAGTAGAGACAATAAAATTAGGTCTGTGCTTGATTATCAAATTTCCTTAACATTTTCTTTCTTAACATATACATTGTTTGTGATGGATTATTCAATTACAAAAGACTTACATTTCTTTCTTAACATATACAATTATCTCACATACATGGCATGTAATAATTTAAAAAAATAAATAATATGT…
>GalT_1355
GCACGATTGTTGGTCCGTATTCTTCGTATTCCTGTTTTGTTATCCAGTACGATTGAAATGTGGATAAAGATCCTAAAATAGATCCACCAATCCACACTGAGGATTTACGTTCTGGGTAAGCTATCACTTTCACTTTCGTTGTTTTTGGAACAAACGATTCTATTCCTTTCCTAATTCTCTCAGGAAAACCAGGGAACATAGTAGTTGCTCCTGACAAAATGACATTACATAATAAATCTTTCTTGCAGTCTACGTCTGTTGAATCCAAATTACTCTTCAACATATCCACTATACCTCCAGATCCTACACCCGGGATAGGTCCAAAAAACGCTTCGGGGCACATAAACCTTTCTTTCCCGATTGTGATTGCGTTTCCATCCGGAAGTTCAAATTTCTCAT…
>GalT_1392
CAATTTTATTGTTATTCAACATAACACACTTCATTGTTTTAATAACATCTGTATTTCAGTTCAGTATATTTGTATGTGCCACCACACGGATCGCCATAAAGACTATTGGTGGCTCCAACTTTGCATATTCTTTTCCCGTTGCACTGCTTTTTAATCTTTGCATCGGATGATGATGACTTACATGATGTAGTTTTGATGCTGCTGTGTGGACAAATACGTTTATCTTCTGAACGACCGTATATAGCCTTTACAACTTTTATTTTGTCGGATATTTGCATCTCACGTAAGCAAATTGACCTTCGCAAATTATAACATTGGTTACATCTGATAATATTCTTCTGCCACATGATGGTCTTTTCATGTTTAGCAAGGAATGGAGAATATCTTCTTGTATCTTAA…
>GalT_1397
GTCCTCCCTCACATCCTTGGTCTACTTTATCACAGCTCACCAACTCCTGCTCTGATAAAGATACCAGTTGTTTCTTCTGTATTGCCCACTGTCCCTCTATGTTGCCTGTAGTGGAGAAAGCCCAACATGATCCACAACTTCCCTGATTCTTCACATCAGAGACTGCATTGTGATCTCTCCAATCAAAGGATTCTGGGATTGATCTTGGTCTGATGAAAGCTTGTTTCATGTCTTTGTTGGTATTCTTTATCAAGTTCCATTTCTTTCCAACTATTATTTCTTGAATTTCTTTCTCTGTCAAATCAGCGAACTTAGTAGCTCCATACACAGCAGTTCCTTGTTCTTTCTCCTGAATCATTCTGACTAGTTTTCATTATTCTCAACAAAAATACCTTAAAC…
>GalT_1425
TTTTTTTTTTTTTCTACAGTATTGATACTTTATTGAATAATATTGAATCTGTCATTTACTGTTAGCGGTATCATCTACATTACTATTGGAAGCAGAAATTACTTTCACAGACATAGGGATAGGAGTACTGACATGGGTAGTCGTACCATTTACCACTGCTGTAGTACATCCAAATACAGTTATATGTGTAGGAGTTTGAACTACTGGTTGGATAAGGTCTTCCTGAATAAAAGTTCCTGTAGCTTAACTGAGTTTGATCATGTATCCATCTCCAGTCACCATTGACGACATCTGTAGCTCCAAGCCAGTAATATTGTTTTTTTCATTTTATTTATTTTCTGGTGTATCCAACTATTTTCTGAGGCATCATCAATCTTCACTAAATATCCACCAATCTCT…
>GalT_1448
GACAACTGGGGGTTTGGCAACACATGCCTGCTGCTGGTTGTTGCATTGTACATACACTAGGTAAGTTAAACTGAACACATAAAGATTGACAGTTGTACATTCCTGATGAGGCGTTGGTACATGTGCACTGGTATTTACATCCATCCTTCCATTTCTGGCCTTGCTGATATACTTGATTATTATACACACAACCTGTAGATTGTCCAACATGACCAGCTCCAGTTCCTGTGTTTACTACAGTACCACCACTGGTCATTCCACTGGTTGCACAATATGCACAACAATTGTCTTGCACCCATCCGGTGTATTTACTGTCAGTACATACGGTCTTTCCATAGGAAGCACAGTTTGTACCTTGGTTTGTCTACACATGACGCCCCCTGTCATGGTACCTCCAG
>GalT_1464
AAATTACGACAGGATGGCAGAGTATCATATATAGAATTTTTGTAAACCATTTGCTCTGAAGAAACAGATGTGGCGTCATGGCAATAATATGCTGTCTTTGTTACAACATCCACAGCCTGAGATACCTATAGCAGACATTGGGGAACCTCCACAGAAAGGATTACATGGAATTACATCAAAACTTAGACAAAAACTGGCTGGAGACTGGAAGAATATACGAAGGGCTTTCAAGAAGTTAGATAGAGCTAATGATGGGTACCTCAATGTGAATGAGTTCAGATCCGTCTTGAAACTTGCTAACGTCATTCTAGATGAAGAAGAAGTTTACCATGTATTGACACAGTTTGATAATAACATGTCTGGAAAAATATCTTATGAAAAATTTGTTGACGAAGTACT…
>GalT_1507
GGTTACTACATATTTTCGCTCTATGCATCTAGTTCTGACAAGGAAGGTCAGACTTTAGATTGTGCATATCGTTATCTAATAATAAATCAGGAGGCTAACCCTACCGTTACTGTGTTTCCTAAAACCTACCATCGATGGCAGAGGTGCACACTCCACGAGCCAGTGTCAGGTGACTTGATGACGAACAAACGCTACATGTTTAGATTGGACGTTCCACAAGCAGTGGAAGTGTTCCTCGTAATAGGAGAAATTTGGTATCATTTAAAACGGAAGTTAGGATTTACATGGGAAGGCAATATTAATACAGGGAAAACACGTGGAACAGCAAAAATATATGCTAGATTTACAGCAGATAGAGATGCTTCAATATTTGCTCATTTGTTGGACTTTGAACTTGTA…
>GalT_1514
CGGAAACATAGGTGGACTTAATGTTGAGACAGTGTCCATTGCTGTTATTGGCAATGACGAAGCCGAGCCATCATCAAGGCTTTGAAACTTTAGGGAAAATCCTGTCTTTTCATTGCTTGAATCAGTGATGAACCTAACTATCAGATAATTATTGTAACTACGGTAGCGATGAGTTCCTGTCAAACTTCCAGATAATCTAGCTATGGCTGTGGCAGTGGCTTCTGTTTTGCCACCTACCAAGATGTCCACCACATCAGCATTCTTCTCAGTATTAAAAACTTCAACCTCCAGCAGAATATTGGTTCCTTCTCTTCCCATGATGGTCCATAGACAGACTGATGAAGATGTATATGGTATTAGGTACTAGTTTACTTGATCTAATTGGTTCCTGATGGTACA…
>GalT_1524
CTTGACGACAGCTGGTCCGAAACTTCTGGCTGGGTTCAAACTACATCCGGTGTACGACACTGCAAAGAGATGTCCCAAGGCAACTGCAAGTCCAATGGTTAGTGGTGCGGAACCGTGCAAATCTGTGCGTTTTTCGTCAAGCGAAGCCAAAACTGTTAACACAACAACAAATGTTATCATTAATTCGACTCCAAATCCTTGAGCATCCGTGACATCTCCCCTTAAACTGTTAAGTCCAATAGTTTTCTGCTGACTTTCTGGTGTTAAACCTATTAAAAATTGCTGCTCCAATGATTGCACCTACAATTTGGGCAACAATGTAAAAGAAAGGCACGAACTACACTAACTCTACGGGTAATAAGAGCTGCCACTGTTACTGCAGGGTTAATATGTCCGCCA…
>GalT_1537
TGAAGCAGATTTATCTGTGTCGATAGTATCTTTAATTTCAAGTTCACTTGGATATATCAAATGTAAGTGATCACTGAATCTATTATTATTTAGAGACAGTACATCATCAATATACAGAAAGGTGAAACTAGAAGACTGGACTAATTTCTTTTATCTTTTCTGTACAAGCCCTTGGATAAGTTCTTCTTCATAGGAATACAAAAAACAAATCTGCAAGTAGAGGAGCGCAATTGGTACACATTAGGATTCCAATAGACTGTTGGAAGACCAAACCTCCAAATTCAACAAATATGTTGTCAATTAAAAAGTCCAGCATGGCAGTGGTTTCTTCTTCGGTGTAAATTTTTCCTTGACTCTGTGTGATTTTTTACAAGTTAAACTTAATTTCTGCC
>GalT_1586
GTGGACCTTCTGGTCCAACTGGTCCAGGTACTCCAGCAGCTCCAAGATGACCCCTATCTCCTTTCATTCCAAAAGGTCCTGGCATTCCATTGTAACCAGCGACTCCCTTATCTCCTTGATCTCCCATAGCTCCTCTTTCACCGTCTCTTCCAGTTCTTCCTCGTTTTCCTGGATTACCCTGTGGTCCTGGAGCACCACGGCCTCCTTGAGGTCCCTGTTCTCCTGGGTGTCCAATATCTCCCTTTAATCCACCATCTCCTGGAGGTCCCACTGGTCCTGAATTTCCAGTCATACCCTGTGGTCCATTTGCTCCATGCATAGACATCATATGCTGTGATAACATTTGTCGGAAGGCCTCAGCTTGTGGAGCCCTCTTTTGGTCCCAATTCATAGGAATGA…
>GalT_1595
GTTTTGACACATTAAGTTGGAACCATATCTATATTTACAGAGGCTCTGATAGGGAAATTCTCATTACATGTATGTACCAATGTAAACAATACTGTATTGTTTTCCATTTACAGAGGTTATGGTAAGCGACATACAGTTACAGGACTGGACCATCAGACAGAATATCATTATAGAATACGATTTATGAATAACTATGGAAACAGTGAATGGAGTGCTCATGTCAATGTATCAACAACAAGTAAGATTTGATACTGTTAATCAGTAGTTTTAATGTCACAAATTCGTAATTTGCAAGTAAACATGTGGATTCATTAGACTTAGTAGTTTTTGTAAATCATTTGGCAATCTTATGTTTTGTCAAACTATTTGCGCAAACATTGGTATACTATTTAAAGAACC…
>GalT_1653
GACTTGATTGTCACTCCAGACGAAATACCCTTCCCGTTTCGGTATCCGATCCTCCAATATATCGCCAATGACCATAAAATACTTCGTGCATCTTGTCATGCACATAGACATTTTCACCTTCATCGTTGGGTTCAACAAGATACGCACCAGCTCTTTTACACATTTTCTGAGCTTCGGCATATGTTGCCTTTTTGCCAACAGTTCTGTAGTAATGATCTTCATATCTGAATAAATTGGTATTTGATAACCATGTTCCAAAAAAACTGCTGCCTATATATTCATCACTCTCACAAATGAAATATTGTTTTTCGTCACATGAGTATGAATACCAGTAGCCAAGATAGCCCATTCTTGTGCTATCTTGACCCAACTGATTCGTCGTTTCCAATTTCTAGCCAG…
>GalT_1694
TTTTCATATCGAACGTAACTGGAACCAGACGTGTCTATTTACAATAAATGGAAAATTTAAACTAATGTCATAAATTCCTTTTTTGAAATCTGGCCATCTCCATCTTTGTCAATACTTTTAATCATGTCATCTATTTCAGCGTCACTACAACCACATTGTCGGCAGGCGGTGGTTACCTCAGCACGTGATAAGGTACCATCTCCATTTTTATCCATTTCATTGAACGCCTTATCAAATGCTTCACGTCTATTTAACTTCCTGCATAACTGGTTCAGAAATTCATCTCTAGTTATCTTATCATCTTTGTTGTCATCCAAACCCATAAAGATATCAGTTGCAGCTTCCACTGAAATGCTTTTCTGGAAATAGCTTGTCAATCCCTTTAACAACTCCAGTTTT…
>GalT_1706
ATTTATACACAATTTTGTGTTCTCCAGCACAGCACTGAAAGCTTTCCCAGTGAACATCTCATTTTGATGATGACAAAAATACAAAAAATGTACAAACTTCAATCTACTCTTAAAATTATCAACAATGAAAATGTATACACTGTCTGACTGTGGATAATTATTTACAAACAACTTCCTCTTTGTGGAGAGAAATTTATATAAATTTAATTTCCTTTTTACAACTGTACTATTTTTGATGCAATGAACTGAATGCATGATCTGATGAATTAATGACTTGGTACTTAAAAAATTAAAAAAAAGAAACCTAAAAAAAAGTAGACAAACAAATCTCTTACCCCTTACATCTAATGGACGTAAAAATTTATTCTTATTTTAATTGTTTGCCAGCTGGAGTGCTGC…
>GalT_1787
ATTCACAGAAAAGACAGCATGAGTCACGCTTCCAAAAGAGTAAGCTTAGTGAAGAGTGCAAGAGGAGACATTAGATTTGAGGGATGTGATGCATCTGGAGGATGGGTTGCTATAAAAAATAAATGGATCAAAGGCAATTAACATGAAAGGATGGACAATAAAGAAGGTGATCAATGGTGCGGATAAATACAGCTATACTTTCACAGCAGAAAATAATGCACAACCTGGCAAGGAAATGAGGCTTGTTGCAAGTGGTATGAAAGATGAGGCAAGCTACGGCGATATTATTGTTGAGAATTTCACATGGGCACCAACAGGAAAATTCGTCCTTGTAGACGACAAAAGTGCAGAGAAAGCTACAATGGATATCAAAATTGACAACTAAAAGAGCAGCTATGT…
>GalT_1838
GATTATATCAGCACGAGTACCACCGTTTGAAGTTGATGTCATTTCTCGATACGATGTGGCTTCTTTAAGTCAATATCTGAACTTTGTCAATCTAGCAGCATTCAACTTTAACAGAGATTATAAAAATACTATTGTTCATGGAAGTGCTCTAGATGCCGATACTATGAATTCATTCACAAATAATCTGAATGTGAAATCATCCATAAATGTGTGGCTTAATGCTGGATTACCAAGAAACAAACTGGTAGTTGGAATACCTGCATATGGCAATACATACGAAACTTCACCGGGAACACATATGGTAGGAGCTAATGCATTTGGACTAGGAAAGGAGGGACAATGGAGCCTTCAGAAAGGAAAACTGGCCTATTATGAAGTTTGCAGGAATATTGGAAGTTA…
>GalT_1845
TTAATGGTGAAACAATCGGCTCTAAGCCAACAGTAAAACATGACGTCAATTTTTCATACGAACAACTCAAACAGAGCTGTGGACTCATCGGGCTCCAGAGCGGTACAAACAAATTCGCCTCACAAAAAGGCATGAGAATTGGTGCAGTACGTCATATTGCTGACATCAGGGCTGATAAATTCGACAAAGAGTCCGAAGGGCAGATATCTCTTCAGTCTGGAACAAATAAATTTGCAAGTCAGGAAGGGAATGACATCAATGGGGAGCTGTCAGACATATTTGCGATATTAGAGCTGACCAGTATGACCCAGAGAGTAAACAAAGAGATCAATCTAACAAAGTGGTAACTAACAAGTTCGACAGTCAGTGTGGCA
>GalT_1850
CAAGAAGAGCCTTTGACTTGTGGAGTAAAAATGCCGACCTTCAGTTTGTAGAGCTACAGTCTGGAGACGCAGATATAGATATCGATTTTGGAAGACGAGAACACGGCGACGGAGCGGGAAATGCATTTGACGGGCCTGGACGTGTGCTTGCTCATGCTTTCTTCCCTCCATTTGGAGATACCCACTTTGATGAAGATGAAGGATGGGTGGTTAACAGAACAGGGGTAGATTACTTTACTGTAGCAGCACACGAATTTGGACATGCCCTCGGATTAGGTCATTCTGAGATCAGACAGGCGCTAATGGCCTACCCTTTTACACTGGCTACAA
>GalT_1923
ACTGTGTATTGTTGTTAACCATTGTGTATGGTGCTGTAGGTCATTTCTCAACACTTTACACTCAAACCTAGCATCACTCCCGGCTTGAACTGTCTGGTTATTTGGTCCCAAACCAATTGGTTTTGTCATTATTGTCAATTGAAGAACTTCAATTTTAAAGGTAAAATTTAATATACCCTGTGTATTTTCTAATACACAGGTATATTGTCCTTCGTCCATTTTTTCCAAATTTAAAATAGAAAGTTTCCATTTTCTTATATGGTAGTGTCCTCCCTTCATGCCAGGATCAATGTATTGCTTGTTTTTATACCACTTAATGGTAGGTTTTGGTTTTCCACAAGCAACACATTTAATTTCCACTGTAGACATTTCTGGTCTGGCAATCCACTCTCCATTGGT…
>GalT_1980
CTAAAAAGTAAAAATATTAAACTTTAGCAAGTAAACAAAATTAACACAAAACTAATACACAAACTGCACCATTGATGACAGTCAGTTTAAGACACAATTACACAGAAATATATAAAATTAAAAAAGTTCCTAGAAAAATAGTGCTTATACACTGCAGTATTACACAAGACAATGCTTTGTATATGTGTTACAGACATCGGTTATAACTATGATTTGAGGTTGAACACTAGTGTAAGAAATTGTTCGTAGCCGATCTGGATCACACCATCTTGATCTGTATCATAGGCACGGAAAGCACTTGTTAAAGTCTGCATGACTACACAGCATTGTACAAAATCATCAAATGCTATTGTTCCTCTACCCTGTCTGTCAAACTTCACCAACAATATATCAAAGAAT…
>GalT_2021
TCCTCACTGGTGGTTCAAAGACAAGAATGGTATCATCTGACAAGAAATAAGATATAATAAATCTTCTGTCTTGATCAATTGGCTTGGAGGTGTCCATTCTAGCCAAGAATCTAAGAACGTTGCTGTCTAAACCACGACGATCTTTCTCCATAAATTTGATGAAGTCACGTTTTGGAGGTTTAGGCAACAGACCCATACATGAACATAGTGAATCTTCTTCACTTCCCCATCCATTGTATGGTGGCCACTGTCGTTCAACACCTCCATATCCTCCCTTCTTGTAACTAACTGAATTGAAGTCCTCAATGCCAAATTTGGTTCTGTAATATTCCTTTGTGAAGTCATCTAAATCACATATAACGTACTTCCTTCCCCAGACATTCAACACAGAGCCTAATG…
>GalT_2027
TAATAGGACACTGTTATATTTTCTCTAAAGATAAGTTACCATGGGAAAAAGACCAAGAAAAGAATGCCAGGAGATCAATGGCTATTTATTGAAAATACGATAATGAAAAAGAGAACACTTGGGTAAACGAGCGTGCAAGAAAAAAAGGTAGGTTCCTACTACTGGACAGGTTTATCTTCGAAAGACAAATATACGTGGAGGTGGGCCCATGAAAAAAAGAATATGGAGTATACTAAATTTAAAAAAGGATATCCTGTGAAATACAGTAGCAGTCCTAGGTGTGTATATTTCTATAGTCATGACTACGGTTATTGGAAGAACACCGACTGTAAAAGCAAAAAGAACTATATTTGTGAAACCGATAAATGTGTGTAAAAGAACAAGAAAAAAGAAACAATG…
>GalT_2044
TTTGGTAACAACACTGTCACAGATATTAAGAAACAAATAGTACAAGCCATCCTTTTTCAAGACAGCTATTAGTAAGTACTTGTGAAATCATTTCCACCCTCCCCAAAAATCATTACTGTTGTCACACATATTTTCCTCAAGGAAATTCCCTTGTACACTTGTTGATTTGAACATGAACACAATTTTTAATGCTGCAACACTTGACATTTGTATATTTTATTCCTTGCATTCATTTTCCTTTTATCCAAATCAGTCAAATTTAAATACAAGAACATGACCTACAACCTTATACAAAAAATTGAAAAAATGACTAGAATTGAAGTGCACAGGGTAGCACAATGCTGGTATTAATGAATGGAAGCTATGAAAAATGAAGAATGGTAACAAATCCTTTCATCG…
>GalT_2050
CACTGTACCGTTATATAACGTTCATGGATCGACCCCGCCCACCCCATCTCCCGTGGACAGCAGTGGGCGTGGATTCCACGCTATACCGTGGACAGGTCGGTGGGCGTGGACCACAGATGTCCACCTAATGCACACGACATACCGTGGACAAGTGGACACGTGGGCGGGCGTGGACCGAAATGTCCACCCAATGCACACGCCCACCGTGGGCGCGTGGAAATGACAAAGTCCACGTGGGCTGTAGTGTAGCAATTTTCATATTATACTTTTCATGCAAATTAAATTTTATTTACAGCATCCACATGATATGAACAAGAAAGGTCTTAACAAAACTGTACAACAGCGAAGTCACGAAAGTTGAAAGTTATTCAAGACCACTTACCGGATTACTTGGGAAAA…
>GalT_2053
AAATTGGTAACCATGTTATACCTTCTTATCGTATCTTTTATTATGGTGATGTATGTGGATAGTGAGGAATGTACAGGAAAATTAATGGAGTTAAAATCAAGTGAGAGAAAATTGAGAAACGAATTGGTCCGTCTACAGAATGTGTTTCTAGAACGTCTTTCTAGAGGTGATAAAGAGGATCTAGAGTATAGAAAGACGAGGAAGTTTATAGGATTTTCGGCATATATGTCTGTAAGGTTTTGTGAATAGCCATAGTAAATCATTGTTACCGGGGAAAACTCTGATATTTGACCAGACAGAAACTAACACAGCTAGTGTCTACAACACCAATACAGGCATCTTCCAAGCGCCATCTAGCGGAATGTATGCCTTTACATGGAC
>GalT_2070
AACGTTTGTTCCACAATATGCTGTTCGTAGTTCGGTTGACTTTGCTGGTGGTCGTCATCAACCACACATTTGGTCAAACTTGTCTTTCTAATGAGGCTAAGGATGACTTTGATAAATCAAGACAAGCCTTGACAGATGTGCAGGAAAATATTGGAAAAGTTCTTAACAAACTTGAAAAGGACAATAAAAAGACACTAAACATGTTTAAAGAAACTCTTAACACGATGGGTCAAAAGATAAAGAAACTTGATAAAGATTTTAAAGTCCTTAGGAAAAGTATTTTACGTAAAACAAAATGGCAACAAATATAACGGTCACTGTTACTACTACAGTCCCAACACAGCAGATTGGTTTACTGCTGAAAAGAAAATGTAGAGAAATTGGAGGATATATTGTCAA…
>GalT_2081
AGATCGTCCATCAGATCGCAGACGTCTAATACAGATAAGAAGGTGACAGTTTCTGTAGACGACAATACAAAAGAATCGCAACCAGATATACAAGTAAATCGGCCATCCAATGGAATAGCTATTGCTGCTTACGAAGTTCAACCATTGATAGAAAATGGCTACACGAAAGTTAAGGAGAAAAAGCCAAAACTGCACCCACCTGCTGGTTCACAAATGAGGATAGGATCATATCGAGATATTGTTGCTCATAAAGACGACTTTGCTAGACCATTGTAATAAAAAAGACATATTTTACAGCGGAAGTATCGTTCATATCCCACAATTTCGTTCTCAACCCAATATTGATAGCTATGTAACTAGTATTACATCAATTCCAGGTGTGTCAG
>GalT_2093
AAAATGCAGAACCATCAGTAAACCATATTGTATCAGTAGTTGGATGGGGAGTGGACCCTAAAACAAATACAGAATTCTGGGTTGTCAGAAATTCCTGGGGAACACCTTGGGGAGAACATGGATTTCTGCGTATTGTTACCAGTAAATATATGGATGGCAAGGGAGAACCGACTACAATTTGGCTATAGAGAGTCAGTGTGGCTATGGAGACCCAATCATTCCACCAGGATATTAATGCGCCGTCCTTATTGTTGTGTGATAAACATTCCAAGAAAACATTTTAACCTGACTTTTAGTTAGGCACCAGTATTTGGCATAATAAGTAGTTTTGTTTGCAATGTCTTCCAAACAAAACATTTAGTGTGGATCAACAGAATTGAAAAGATTTGCTTTTACTTC…
>GalT_2128
GTATTAGCGAATGCAGATGGAAAAGACAGAAATTAAAATAACAGATGCAAAGCTATCCCTAACTGGTCCCCAGTCTATCATAGGAAGAACAGTAGTAGTCCATGCTGATATAGATGACTTGGGTAAAGGTGGCCATGAGCTAAGCAAGACAACAGGCAATGCTGGGGGTCGTCTGGCTTGTGGTGTCATTGGAATTTCAAAGGTGTAATGCATTCGAATGAATACTTTATGTAGTAGCAATGACAAAAGAATTTTTTTTATTTATTTTAAAAATCATGTAACAAAGTGCACATAAGAACACGAAGCCATGTGTCTGTATTACTGTAATAATTTCTATTTAGAATGTTCATGGCCATAGAATATTGAGTGTGGTATGATATATTTTTTAATATTAAACTT…
>GalT_2153
ATTCTCAATTTTATGATAGTATTGACTTTTACTTTAGTCGTTGAAAAGACTCTTTCCATTCAAGGCATTGAAATTGCCACTTTGTTCCAACAATTTTTAAGTATAAAAAGCAATTTAATCTGATGTGTAATTAACTATTCATATTACCTGTGTCCTAGCTCATGAGCTGCTACAGTAATAATAATGAAATTATATCCATCCTGTACGATAGATTGACTATGAGAACCACAAATTACACCTGCCCAGGCCATTCCTAAATAGAGAGTAGTGTTGCTAAGGTTTTGGCAGATGAATAAGCCATAACTACTATTATAGATTATAATAAAACATGTTCGTGGGTAATAACGCCGT
>GalT_2167
ACAGAATAGCCTACATTATTACAAACAAAAATAGAAACCAACAAATTAACAAAAGAAACTTATTTACTAACACTGCTAAATAAAGTGTTACATACATATAAACAAACATAGCATATTTAACTAAAGGACAGACATCTATATTACAAATAGTAGAAAAAGAAGACAGTTTTGTCATTGTTCAAATAATTTGATAAAGTACTTTTCCGAAAAAGAAGCAGTAGATATAAGGTTGCTTTGACTGTTCCATACATTGACAGCGATTAAAATAGTTTCAACAATAACAGCATTATGAATATTGAAATTATGTTCGCTTTGCTCTGTTGTGGATGGCTTCACATTTATCAGCAAGATGACCTTGATCCAATTCTAGACAGGTACCCCATTCATCAAGAGTGATGG…
>GalT_2176
GTTCAAATCTATTTTATTCTTGTAGAAAATTTCCGGAAAATGTTGAACTGTTATCTCCACTTACAGTCTGAGAAAAAGTTTTTCTGTGTTTGATATAAACACGATCCATTTTGATCAGTTTAACAACTGAACTGATTGTTTGTGAATTATAATGACCCTTTGAGACGTATCCCCACGTATAAAGTTTATCATTCTTGTTTAATTGGAAGTGAACTTCATTGCTACCTTTTGCACGAATTAAACAGTTAAACTTGTATATGCCACTTTTTGGCGCAGTGAACACACCTGTTGTAGAATCGTATCCATTACCAATATTGGTTCTGACGTCATCAAATTTTAAAATTGTAGTGATATTTGTCAGGGTGGTATCTTTTGTCAAGGAGGCAAAGAAAACCGGTC…
>GalT_2234
AGAACAGAGACGAAATAGCCGGAAAAAAGGGATTTATTTAAGTTAACATCGGAACAAAAACATTCAACAGCATGTCATCAGAACCAATTTACACCCCTTTCTTCGGAGCCATGGGAGCAACTGCTGCAATTTCCTTTAGTGCCCTAGGAGCTGCCTATGGAACAGCCAAATCTGGAACTGGAATTGCTGCCATGTCAGTGATGAGACCTGAGTTGATTATAGAAATCTGTCATCCCAGTTGTCATGGCTGGTATTTTGGCTATTTATGGACTGGTCGTGGCTGCTTTGATTGCTAACAGTATTGACAAAAGTTACACATTATTCAAGTAGTTTCTGTCATCTTGGTGCTTGGTTTAAGTGTAGGTTTGAGTGGTCTGGCTGCAGGTATTTGCTATTGGT…
>GalT_2236
AAACTTCAGAAATCAGTGGCGGACCACTTGATGGAAAATATCGACTCGAACAATTCCATTTCCACTGGGGATCAAATAGTAATAAAGGTTCAGAACACACACTTAATGGTTACACCTATGCTTCTGAGCTTCATCTAGTGCATTGGAATAAAAGTAGATATAATAGCTTTGGTGAAGCAGCAGACAAGTCTGATGGTTTGGCGGTATTGGGATTCTTTATTAAGGAAGGACAAGAACACAAAGAATTAAGAAAATTGACAGATGGAATTCAACGGATCTTTGATAAGGATGCCCTTAACAAAATCCGGATAAGTTTCGACCGAAGCACATACTACCATCTGTATTTG
>GalT_2263
GACATTGCTGATGCCTTTAGTTACACATGTAATCAGATGTTTGTAACTAGTCAAGGAGATCGATCGGAGGCTGTGAACTACTTAGTTCTTTTGACTGATGGGAAGTCAGACTCCACCAAGGCTGTACAACAGGCAGAACTATGTAGCAGTAAAGGTGTCAGAATTATAACTGTAGGGATAGGGTCAGGCTATTGATGTAGAATTATTGAAGAAGGTAGCCTAATAAACCTGAGTTATTTCGTTAATACTGCATACAGTGAACTGAATACCAC
>GalT_2268
GTGGAGTCATATCGTGACCTGGTAAAGATGCTGTGTTGATAGGTTGTTGTTGTGTGAATTGTGCAACAGAAGAATTAGTAGTATAAACTGGATCATATGTGCCCCATGGACTTCTTTTTATATCTGTTGGGTGATATCCATTGGTGTCAGACGACGGTTCAAGCACGCGCCGTGCGTTGTCTGATTGCTGTGATAATGGCCGTCTGATTGTATTCCAGTCCGGTAATTGTGATGAAAATCTATGGCTTTCTAACTGAAGTTCAGAATATGGATTTCTGTCTTGGAAAATCTATGGGACTTGGTCGGTGAATTCTGCGATCATCAGTTCGGAGTTTTGTCTTACTTCTTGGATCACGTGGTCCATCTACGGTAACTTTAATGGGCTTTCTGGTACAAAGT…
>GalT_2276
GCCTTTTCAAACTTCTTTCGATCTGTCGCTCTCCCGTCAGTGATTATTACGGCTATCTGTGGAACACCATAACGGCTGCCATGTGACGTTGATAGTCCTTCTTTCATTAAAAGCCTTAGAGCTTTATCCATATACGTATTACCTCCCTTCCAATCATTGGCATTCATCTCCATTAGTACTTTAGCGATTTCCTCTTTTGTTTTGAAATCGTCTAATTGGAATAACATTTCCGGGTCATTACTGAAGGTCATCATTCCTACCCTCACCTGATCAGATCCAACGTCAAAAGCATCTATTACATCTCCCAACAAAATTAAGTTCCTTTTTAACATTTTCAAATAAGTTCAAACTGGATGATGTATCAAACAATAGAAAAATACATCAGTCTTTTTTCTTGAA…
>GalT_2313
GTTTGCTTTCCTCTCATCCCTTGGACGGACGACAGTTCGAGGCATCTGAACATTCACATATATACCCCATTTGGTCTATACTGCAAATTGCATCATTCCATTCATTATTTGCTGCTGACCAAAAATGACCACAGTCTTCATTACTAGCATTGTCTGGTTGGCCTCGATTCCAGTTAGAATAACTGACTGCTGAAGAGTCATTAACCCATCTCCAGTCTCCTTCATTTCTTTAAGTCTGCCATACCCATCCAATAGCCATATTTGTGTTTAACCGATTTAGTGATCATGTCAACAACCCATGTAGTTTTCTTCTGAGTCTG
>GalT_2329
AGTAGTCATGGCCATACATACAAGGACATCTCTCTGGTTCAACGCATGATCCATCGGGTGCCATTACTGTTCCATTGGTACATCCACAACCTTTGTAATGTGTATTGTCATTACATGTCATCTTCAAATCGATATTTGCACAAGTCTTGTGAACATTGCATATTGAGTCGGCTTCAATGTATTCTTGATTTTTGGGGCATACAATATCTTCACATTCATTATGATCACAATCCCATGCACCATCCAAACATGTGCATATGGCACACTGTACTTGTGATAATTCTCACCATCGTTACCC
>GalT_2336
GTCGAATAGTAACGAGACATCATTGCTACAAATTCGTCAAAATCGACAGTGCCATTCCCGTCCTTGTCTGCGTCTGAAACCATTTTCTGAACGTCATCGTCTGTTGGTGTCTGACCTATTGACCTCATCACACCTCCCAATTCCCTACAGCATATGACGCCGTCTCTATTCTTGTCGAACAATGAAAACGACTCTCGCCAGTCACTTATCGTTTCTTCTGAAAACTGACCAGCCATCTGAATATATATAAATTTCAATTTCCTAGTTCTCTTTGTTATAACAATACGTAAGATGAATATACAAGTTTTTTGGTATAGATTTCCTACATAGGAATCAATCTATATTGAATATTTATCGTAAACAATGAACAAAAATCCTGGAGGACATAACACGTTTCCT…
>GalT_2337
ATTAAATGGTCGCTCCCTGTCTGATATCTATAAACGTTTTTCACAGATGTAACCGCCTCTCTTTGAGTAACATTCCCCGTCATTCCACTTAAACGATTTTGAATACATCATCATGCATTGCTCACCGTTCGAACGTGGGTTGCCAGGGGACCAGTTTTTGTAATTCAGCTCTGTGAAATCTGAAACCCACATCCAAGTATTTCTTCCAGTCGGATCATTTCCACCTAACCAAATCTCTGTTTTACCTGCAATTGTAATTTTGATGCCTACCCATCGATTTTCTTCTGAGTCGTTAATTTTTACCAAGTTACTGTTCTTTGATTTACAGATATCCCTTGCATGGTCCCATGTCACACCGGTGAATAGTAAAAAAATAGCAGTTATTCCTGAATTGGAACC…
>GalT_2369
CGCATATATAATAAAATTTACTGTTGCATGGATGGTCAAACCATTGTCCATTATGATTATTAAGAAGGCCACCACAGTTGTAACCATTGTTCGTTTTACCATAACTACCATTCCAAGGTAGATAAGTAGCTTTGGTTTGATCAAAAGTCCAACGATATTCTCCTTCAATCAAATCTGTTAGTCCTATCCAGTAATGGTTACTTGCACTTGGTTTGTTTGCAAAGATTTGTTTATTCTCCTTTTCGTCACCAATCTTAGCAATGTAACCACCAATATCCCTGCATTTTCTCTCAGCAGTGAACCAGTCTTGTGAGTCAGTGCCATAAAAGTAACAGTGTCCATTGTATTTGTGCCTATTTAGTTTTCTTAAAATTCTTTTCCTAGAACCTGGAAGTCACT…
>GalT_2390
ACTGTATCTGTGTGTCCTCCTTCACATGCTGCATATAATGGAGAATTTTCAGTCTTATCACCATGAGAGATATTAGCACCATTTTTGTAGTAGCTTTTCTACTGTTTCTGTATGACCTCCCTCACAGGCCACATGCAATGGCGACTTACACCAATAGTCACACTGCGATACATCAGCCTTGTTCTCTAATAACAGTTTAACTACACACGAATCTCCTCTTTCAGCTGCTATATATAAAGATGATAAACCTCGACCGTCAGTCTTATTGACATCACATTCAACATCAACAATCATGAAGTGAACAATTTCACAATAACCACTTGAAGCAAATTCTAGTAAAGGTGTTGTTTCAGTAGGGTGTCTCATAAACGGATAGTTTTGTTCAATAGGAGTAATTTA…
>GalT_2411
CTTTGCTCAATCGTCCTTTATCGTTTGTAATTGTAATTTTATTCGATTTACCCGTGCTTTTATCCTCGGCATGTACGTTTAAGATTCCGTTAGCGTCAATATCAAATGTCACCTCAATTTGCGGAACACCACGCGGTGCGGGGGGGTATACCATTTAAATCAAAATTTCCTAATAGATTATTGTCTTTGGTCATAGCTCTCTCACCTTCATATACCTGTATATGAACACCAGGTTGGTTGTCTGCATAAGTTGTAAATGTTTTTGCCATTTTGCAAGGTATCCTGCTGTTCCTTTCGATCAGATTTGTCATAACGCCACCTGCTGTTTCAATTCCTAAAGATAACGGCGCAACGTCAACTAAGAGTACATCTTTGATTGCTTCGCTGGTGTCGCCTGTT…
>GalT_2429
ATCAAAATATTAAACAAACTAGAAATTACAATTAATATATCAGAAACAAAACATTTGACATGTTCTTGTTCGTGTCAATGAATTTTAAATTAGCATGAAAAAACAAAACTAGAGTCAATAGAATGCAACAAGATTCCTAACCGGTGACCCCAGTAGGTGTTTCATCATTATGGAGTAAATGCTCCAGGTTCAAGGCCACAGTCAGTTATAGTTACAGGATCAATTGGTGCGTCACCAGAATTGGTTGCTACATTTTCTATCTGCCTAACAACATCCATTTCCTTGTAATACTTTGCCAAACACAACATGAGCACCATCTAACCAAGTTGTT
>GalT_2440
GTCCAGGATTTAATGGTCTGCGTGGATACAAGGGAGATTCTGGTCCTGTTGGTCCAGCTGGACCACCAGGACCTGGATTTGGTGGAAGTGGAGAAATTCTGAAAGGAGCTAAGGGAGATCTTGGAGAAAGAGGTTTACCTGGAATACCTGGCACACCTGGTATTGGGGCTCAAGGTCCAAGAGGAGACCAAGGAGAACCTGGCAGAAATGGTTTACCTGGATTCCAAGGTCCACCAGGTCCCGCTGGAAAGGCTGGAACCGGAGAAGTCATCAGAGGACCACCAGGACCTCCTGGTCCACCTGGGCCATCAGGTGTGGGTACAAATGGAGGAGGAGGTGGAGGAGGCGGTGCCGTGACCTACAGGAATTATAATGAGTTGATGTCAGTGGCAAGAATCC…
>GalT_2487
GAAATTCTCCAGTTCTTATCCCTATCAACCATAACAAACAAGTCTATAAGACGTATCTGGTTTTTACGTAAATGTTGTTCTAGAATTCGCACACCTAGTGGGGAGGGAATCTTAACGGAGGGCACTATAGATATCATAGCTTCTAAAACTTTTTCTATAATTGGTTCTGGAATGATTGGCTTAGGTTTTGCTTCTTCTACCATTTTTCTATAGACTCGTTTTTCTAATTCTGTTTTATTTGTTTTCCTTCTCAGCCATTCTGCATTTAATCCCATATTGTCTAAATCATGTCTAAATTTTTGACGATCTGCAATCCATTTCTTATACGAGTCCTCTTCAGCAACTGTCCTTTTTCCCTGCTGCAATCGCATCAGCTATTTTCATCTATC
>GalT_2536
ATCACCATCACATAAAACCTCAGGTTCTACAATTGGCACTAGACCATTTTGTTGACAGATGCTAGCATATCTGGCTAAAACATTGGCATTTTCTAACATGGCTTGGAAGGTTGGTGTTTCAGCTCCTATTTTTAGAACACATCGCCATTTTGCAAATTGTGCTCCATCCTTTTTATTACTGTGCACATCTTTCTGCTAGACCATCAAGACCCTGTGTTGTTGATTCTCCATCAGTTCCAGCAAGGGGGGACAACTCCCTTATCTACTTTGATACCGGGAATAATTCCCTTTTCTTTCAATACTTTAACAAATGGTACTCCAGCTTTTGTTGACTGGTACAATGTCTCGTGAAACAGAATCACACCGCTAATGTTCTCCGCCACAACCTTATCAGAGGCA…
>GalT_2540
CGATAATCAAACTAGGTTCATTTTGTATTACTTCATCATACTTGTTGTCCTCTGGGACACAACGAACTTCTTGTTTTACTCCATAACGTTGAATATGTAGTGTTGTATCTTTCTTTGTTCTATCCATGGGTTCGACTCTAACAGCATTCATAGAGGTAATCCCCCTGATCCTCATCAAAAGTAATTATAAGGAGATAAGGAAAAAACTAGCGTCCATAGCTGGTGTAGGTGTGATTGGCAAGTCCTCGGTATGGGGAATATGGTGGTTCCCCATTGATATCCAGGCAACTAGATCCTGATC
>GalT_2562
AGTGACAAAGCCAAGGCCAAAATTAAGGAGACTATATACAGATTAGCCATCTTTTACAGCATTAGCCTGTGTGTTTGCGGTTATAACATTTAGTGTACATCTATATACCTTTACAAATGAGACTGAATGGGTAAAAGCATTTAAAAGACTATATATTTTGCCAAGCTAATGTTACCGTGACCACCAGTGTATACAATACATCCAATAGAGTATGTTCCCTAGGTGACAGACCCAGTGTGGCTGCTGTTAATTTCCACATCCTGGCAATTTTTTGGTGCAGGTATCTTGATGAGTAGTTGGTCATGGACCAAAGCTTCTCTGTT
>GalT_2578
GTTAGTGTCTAGATTCTTTATTGGAATATCGCAATTTATAACTTCATTGCTGGTTATGGTACAGATGTTTGACGTCACACATGTAAGTTGCAGGGCAGCTGACTCAATTCTAGCCGTTATGTTGTTTTTGACATCGGCAGTGGATGACGTATCACATCCCTCCATGTCGTAATACGCTGTGTGATTGACGTGTAATTTTTGTTGATGGAACAATCTCTGTACAGTAAGGTAGTCGACCATACGGGTTATCACTTGTCTAGAAAACTCCCAATAGTAGTACGTTTCATTTCCACACACATATTCTTCTTTAACATCATGGTACAAAGTACAAATCCTTCGTCGACAACTAAGTACACAAGTTATTGTGTTGCTGTTATTAACACACG
>GalT_2635
AAAAGCCCTGTTATCTTTATTGTACTGTACAACACCTTCAAAGTTACCAGCCAAATTAGAGTAAAAGTTAGCTACATCCTTGGTGTTAGCAATATCTATATCATCACACAACTTGAACAGTTTTTTCAGTTGCTTTCTTCCTGAGTCTGTCTGAAGCATCTTGCCAACTGTCATGTGTGCTGTTTGAACCATCTTGTTACACATTGGATCAGTTGTGTCTAAGGCTTTAGATACTACATCTAAATATTCAACAAAATTTAGAACAGCATTTATTGGAGCACTAGTTGCAACTGCACCATTGACTAAATGTGGATTATTTTACTACTAAACCAGGCAGACAGGG
>GalT_2647
TTCAAGCTGATGTACATGACAAGCCGGACCAGCTAGAGAAACCACTGACAATGCAACCATCTTTAGATCAAATGCCAAAACGAACACCAGAAGAAGCCAAACAATTGATTTCAAAGTATCTGGACATGATTGTTGGTTACTCAAAAGATGAAGTCGAAGCAGAGGCGACGTCAGTAACTTTTACTTTAGCCGATGAAATAAGACGAGCTGACGCCAACATTTTACGGTCTGTTTGGGAGGAGTATGCAGGAAGTACTGATAAGTCAGCTAACGACGAACAAATACTATAAGAGAGTAAATTTTATTAGATTATTTTACCAATGAGTGGAACACCAGCAGTCTTTTGAGTATTTTGTCTGACTACATC
>GalT_2705
GAGAGATCCAACAGATGCCGTTTTACAGAGAAATATTGGAAGTCCTGGTTCCCTAATGACACCTGAAGGGATACAGGCCGTTTTGTCACAGAGGTTCCATAGAGATATAACACAACCGACATCGGGAGCTAATAATGACCTTGAAGGTCACCATAACAACGTCCATGCTTGGATAAATGGTCACATGGGTGGATTAACAAGTAGTGCGTATGATCCTCTTATTTTTTCTGCATCATTGCTACATCGATTACGTAGTGGGTAACTTTTTAGAAGACAACTAATTT
>GalT_2734
CGTTTATTTGATAGAGAATTCTGGTTTACAATTGTTACATTTTACAGTGTTGCTTAGCAATAAAATAAAAGCACCAATGAATGTCGTAGATCCAATAAAGAAAAATCCGTCAGCATAGGAATTATATTTATCTTTAAACACACCTGTTATTGGTGGACCTATCAGAGTCCCAACTCCTTGGAAGAAAATCAGTATTCCGAATGAACTATTAAGAGCTTCGGAACCAACAATATCCACTAATATAACGGACTTCTGAGAAGTGTATGTTCCTATAAGCAATCCAAATATGGCGGCAACAACACAAAATTCAACAAACGTCACTAGTAAAAGGAAGGGAAAAAAACACAAGCGC
>GalT_2828
GCTGGTTTTTCAACTCTAAATGTACCTGTTCTTTTAATGGTACCTGTACGATTTTGACTTTCGTCCTCATCGTAGCCATTCATACTCAAATAGTTTTCTTTGTTTAAATCTACAACATCAATAATCCTACCAAACGATTTCATTTCGAGAATTCGCTGTAAACATGGATCTATGGAAAATTTGTATCTCGTATTCAGTTTATTTAGTTTCGTCCTTTTGGTATAGCAGACCTCATGTCATC
>GalT_2832
GTCCTCATTTGCCCATTTCCAATTATATTCTGTTTCGGACAATAAGCCTATCCAGAAAGTTATACTTTTCTTGCGTGCACGCTCGGCAAGCCATCGGTTTTCTTTTTCATTGTCAACTTTCACTAAATAACCACCGATTTCCTCACATCGTTTCTTAGTCTTTTTCCCATGTCAATCTGTCTTTTAGAAAATATATAACAGTGTCCATTGTGTTTTTGTTCGTTAGACCACTTTCTCGCATAATATTCTTTATTAACATCAGCAAACTTTTTCTCCAACTTTTTAATCGTTCGACGCATGGATACAATTGGTTCTTTAGAAGAGTATGACCCACGACATTGTTTTAAGGTACTTTTCGATATCTTGCAATGGTCCACGCACTTTGTCGTACTTCTGAAT…

## Sheet: Chil.fasta
>Chil_11
GCTTTAAGACTTTTAATGGACGAAGGACTATCCACGTCACATGGTAGCCGTGCTGACGTTCCACAAATAGCCGTGATCATAACCGACGGAGACCCAAACGATAGGGATGACTTTGCCAGTGCTCTCCTGGAACTAAGAAAAAAGAATATTATTGTATTTGCTATAGGTGTTGGTCCAGATCGTAGACCTGATTACTTGAGAAAAATTGCTGGCGATCCGGAACGGGTATTTGAGTTGGAAGATTATGACAGTCTTAGAACAATCGGAAAGGAATTGGTAGATAAAGTGTGCGATAAAGAACAAAACGATGAAGATAAATGCAAAAAGAAAAAAGATTGTGATGGAGCAATGGCAGATGTCATTTTTGTAGCAGACAGCTCAAGAAGCCTAGGATATAAA…
>Chil_22
TTTGGATATCAGGATGAAATACATATACAAGGTATGTCAGGCTTCTGAAATGTTTAGGTTTGATATCAAAAGTCAATGAAAAAAGTGATAGTGCCGATTATATTAAGTCTCAAAACGAATTTATAGATCATAATTTTAGCTATTTCTGCTACAGCCAGCAGTTTTTATCTTATTCCAATATCCATCAGTGGCACTTTTGTTACAGCCTCTTGGACCTCCATTGTGCATGCGTGCATAATCTTCGCAAGTGGTTCCACATTTCCAGCCTCCATAACGGTTCATGTAAGTCTGAACACATCCTTTGGCACAATCATAATCCTTTGTGCACTCTTCATAACTGTCGCCTGGTCTATTACAGTCAATCCAGTACACTTCCTTTATTTGAAATGGTCCACAGGA…
>Chil_25
GTTTTGGGATTGGTTTTGGGATTTTGTGGACTCTTTCGAAAACTTGAGTAACGGTCTTTACTCTGTGGTATGGTTTGTGTACAATATGTGGTTGGGGTACTGCAATCACTTTAGTTCTGATGATTGGTCGTGGTACATGAACCTTCTTCTTGTGAACAATGGTTCTTGTTTTGTGGATTGGCTTGATGACTCGTCTGTGATGAATCACTGGCTTCTCGACAGGGTACTTTTGTCTGACAGCAATTTCTTTGACGAGAAGTTTTGGCCTTTTAATGATGTTTGCAACCTGGTCCACTACAGTTACGATTTGCTTGTGGAATCTTGGGTGTTGTTTCAAAAGGGGAACATTCTTTCCGACGAGATGTGGTTCTTCATGAGTAACAGCCTTTGGTACAGGTT…
>Chil_26
ATCTTGTCCTCAAGGATAGAAGAAAAAAAACAAAGACCCGTCATGGCAGCTTGGTTAAATTTAGTCATCAGTTATTGCAGTGCTCTTCTCACTAGCAAATGCTCACAAAAACTAACACAGTAACAGAGGAGATCTGGTTTGATGTAGAGGTTAAGGATCATGATGGATTAGGAGAGGACTATAGAGGCAGATTTGTTGTGGCTGTATTCGGAGATAAATGTCCCATGACCTCAATGAACTTCCAGTCATTAGCTAAAGGTTACAAAAGAGGAACAAAGAAACAATTAAGTTACAAAAGATCACCAATTCACAGAATTGTTCCCGACTTTATCATTCAAATGGGTGACATTACTATTGGAGATGGAACCGGAGGTGAAAGTATCTATGGACCAACATTTG…
>Chil_32
TTTTTTTTTTTTTTTTTTTTTTTTTTTTTTTTTTTTTTTTTTTATTTTTTTATTAAGATTTAATATAATTGGATGTATAAAGGTCATTTTATCACAATAATGCAGATGATTTATTCCACATGTACATCAAATTTTGTAGAAAGTTATCTCCCCTGGAGACCTGAGATATGTTTCCGGATTGTTCAGTATTTTTAAGTCTTTTTCACATTCAACTCTCCACATTCTTGCATTTGAACCACCAGACTTTTTCACATAAAACAAATAATAATTTACTGTCATATATTTGTACAAGTACCGTTAGCTCAATGCTAATACAGATCTGAAGTTTGAAAGGGTTAAAGACAGTTTGTATAAATTAAAGTCCATGTTACCAAGCACGAAGCTTTTTGTTTTAACGAA…
>Chil_33
GAAGCATTTCCTGTGGACAATGGATGGGCCAGATTCGTCATATTCCTGTTTGCTGATCCACATCTGTTGGAAGGTGGACAATGAAGCCAAGATGGAACCACCGATCCAGACGGAGTATTTCCTCTCTGGTGGGGCAATGATTTTGATCTTCATTGTGCTTGGAGCAAGTGCTGTGATTTCCTTCTGCATTCTGTCGGCAATACCTGGGAACATGGTGGTACCACCAGACAAGACGGTGTTGGCGTACAAGTCCTTACGGATATCGACGTCACACTTCATGATACTGTTGTATGTGGTTTCATGGATACCAGCAGATTCCATACCCAAGAAGGATGGTTGGAATAGTGATTCTGGGCACCTGAATCTTTCGTTACCAATGGTGATAACCTGTCCATCGGG…
>Chil_34
GGGTTTTACAGCTTTATTTGTGTACAACGAAGAACTCTATAAAAGTAATACAAAATAGTTCGAATTAAGCGTCTTGCTTGGAGTTCTCCACTACACGAACTGTAACGAACGGTGCAGATCATTACTAGTTTTCAGATCTATATTTAACTTCAGATCTCGAGATAAAGTTTAACAATGATACAAAAGTATGCTATCTGCACCAGTATATAACATAACAATAATTGCTAGTTTTGAACATGATAGTTTGTAGTTTAAAAGCATTTTCTGTGGACAATGGATGGACCGGACTCGTCGTACTCTTGTTTACTGATCCACATCTGTTGGAAGGTTGAGAGTGAAGCCAAGATGGAACCACCGATCCATACGGAATATTTCCTTTCTGGTGGAGCAATAATCTTA…
>Chil_35
GGTCACTCCTGTGACTATCGTTTATTATAATTAATATTATATACAGAAGGGTCGTTCCAAAGGAACAGTTGTTTTTCTAAATACAGTCATGTCTCTTTTTATTAACTCCTATTGGTTCTTCAGTAGAGTGTCCAAGTATCACAACACGGAAAATGATAAATTAATTTTAATGTCACCATAAAACATGCGGAATGTGTCATCACAGAATTTGAAAATTGAAATATACGAAAGTTAGTTCTATTACATAGATTAATTTAGAAGCATTTCCTGTGGACAATGGATGGACCGGATTCATCGTATTCCTGTTTGCTGATCCACATCTGTTGGAAGGTCGAGAGTGAAGCCAAGATGGAACCACCGATCCAGACGGAGTATTTCCTTTCTGGTGGGGCAATGATT…
>Chil_36
TTTTTATAGATTAATTTTATTTTTGTATTCAAAATACCATCAAATACATTTGTTTACAATTTATTTTTTATAGCAAATAGCAAAGTAAAAGTCTTAGAGTTGTTCATGGTTTGAAACGAGTTCATACTATGCTTGATAAAAAGATAATGATTGTCTTATTAAGAGATCTATGTTTAGAAACATTTGCGATGTACAATGCTTGGACCGGATTCATCATATTCTTGCTTACTTATCCACATTTGTTGGAAAGTAGAAAGTGAGGCTAAAATAGATCCTCCAATCCAGACGGAATATTTCCTCTCTGGTGGGGCAATTATTTTAACTTTCATAGTGGGTGGACACAAAGCAGTGATTTCCTTCTGCATTCTGTCAGCTATTCCAGCAAACATGGTGGAACCT…
>Chil_44
CATGATGACGAAGTCCATGCACATTGCGAAGTGTTCCCCAACCAGTAACGTAGCAGATGGCGATGACATCAGAGGCGCAATCCATTTGTTACAAAAAGGAGATGATCCTGTGGAGATCCATATTGCATTAAATGGTTTTGATATGACGAAGGAAAATCCAAAGCATTCCCATGGTTTCCATGTCCACCAATACGGTGATACATCCAACTCATGTGATTCATTAGGAAGCCATTTTAACCCCAGTAGAAGTTCACACGGAGCAAAAGATGCTCACACAAGGCATGTAGGCGACCTTGGTAATATTGACTGTGATATGAATGGAAATAATTGACTATACAATGAAAGATGAGACGATCAGCCTTCATGGGGAAAATTCTCTGATTGGTAGAAGTATTGCGA…
>Chil_48
ATTTTGTGTTGCTGCGTCAGTGAACGTACGGGCAAACTAACTCGAATCTATACTTTTACCATCATTTAAATATTTTTATTTGAAAACATCAAGAAACATCAAAATGGCACAGAGTCAACCACGACAGAACTTCCACATCGAGAGCGAAGCAGGAATCAATCGCCAAATCAACATGGAGTTGTATGCCAGTTACTGTTACCAGTCGATGTCATATTACTTTGACCGTGATGATGTGGCATTGCCAGGATTCAGCAAGTTCTTCAAGAAATCTTCAGATGAAGAACGTGAACATGCAGAAAAGTTCATGAAATATCAGAACAAGAGAGGTGGTAGAATTGTTCTCCAGGACACCAAGAAACCTGATCGCGATGAATGGGGAACAGCCCTTGATGCTATGCA…
>Chil_58
GGTCTCCTCCAGCACCTCCGGGAAATCCAGAATCTCCAGTCTATCAAAGATGCCTCAAGAAAATAGCGGATGTTTTCTTTGTTGTTGATACATCCAGTAGTTTGAAAATCAATTCTAATGTCATGAAAGAATTAGATTTTATGGGTGAGGTCATTACAGCGTTTGATCTTGGTAAAGACCAGGTGCGGACCGGAATGATGACATTTGCAACCAATACGGAACTATTGTTCAAACTTGATGA
>Chil_59
GGTCTCCTCCAGCACCTACGGGACATCCGGAACCTCCAGTCTATCGAAGATGCCTCAAGAAAATAGCGGATGTTTTCTTTGTTGTTGATACATCGAGTAGTTTGAAAATTAATTCTAATGTTATAAAAGAATTAGATTTTATGGGTGAGGTCATTACAGCGTTTGATCTTGGTAAAGACCAGGTGCGGACCGGAATGATGACATTTGCAACCAATACGGAACTATTGTTCAAACTAGATGA
>Chil_62
TATGTTAAATACTTCTGATGAAGAATTATGTCCACCGCTTGACAAAGTCGATTCACAACCAATGTAATGCTGGCAGTTGTGAATGTGTATACTCTACGTGGTCTGAATGGTCAGACTGCACTGCTTCTTGTGGATTAGGACTCACAGACAGAAGCAAAACACTCCAAGAACCAAATGACAAATGTAATACCACTATAAGGGATGTTACAGTATGTTACCAACAGGATTGTTTATGCGACAAAGATCATCAGCAATGGACAAACTACTCTTATTGCCAGAAGACATGTGCTAATCGTCATTTGCCTGAATCCGAGATGTGTACTGAAGAAGAGCAGGGATGTATCTGTAAGGAAGGTTATTTCCTCAACTATAACGATGTGTGTGTCTTGGAGGAACAGT…
>Chil_65
GAAAGCTTCACAAAAGCCTGTGTCGAGCAGTGGTAAGGAAGGATAGCTCCATTTCGCATTCGTTTTTTAATACCTTTATTTTTGTGGATATAGTGTAACTTAGGACAGATATTCAAAATGTCGTCTTTATATCGTGATCTCGACTCAGACGTTTCCAGCAGCACAAGGATCGTCAGACACTCATACAATGTTTACAGAGGCAGCTCCCCAAGCAGCCAAAATAGACTGGAGTCCAGAATCCGGGAACTCGAAGATTCCTTAGATTCCGAGAGGGAGATGAGATTAAGGTATAGAAAAACAAAGCGCGGAGCTGACCTTCCAGTTAGATCAAATGGCTGACAGACTCGAGGATGCCATGGGAACATCAACAACTGTAAGTGAAGTAAGCAGGAAGCGTGA…
>Chil_67
GAGATATATAAACACCATAAGATGGTGACAAGGGAACGTACACCATCTAAAAACGGAATAATTAACGATAGGAAATGAAAAAAACATCCCTTTTATCATAAATTTTAGTATTAAGCTTCCCGTTAATGATATAGATATCAAGATCGAGGAAAGGGCAGTGGTCATTGTTAGTATTAGCTTTATTTAAAGTAAGTTCAACAGGATAAATTTCTTTAGTATACATACTGAAGTCGTCATTATTGAGAGCCAATATATCATCCAAATATCTAAAAGTATTGTTAAATTTGTTTATCAAATGTTGTTTCGATGGGTCTTTGCTTATTTTAGTCATAAATTGTAACTCATAACAATACAAAAACAGGTCTTCAATAAGTGGTGCACAGTTAGTCCCCATTGGAA…
>Chil_73
GATGCTCCAAGAGCCGTGTTTCCCTCCATCGTTGGAAGACCAAGACATCAGGGAGTCATGGTTGGTATGGGTCAGAAAGACTCCTACGTAGGAGATGAAGCCCAGAGCAAGAGAGGTATCCTCACCCTGAAATACCCAATTGAGCACGGTATCGTCACAAACTGGGACGATATGGAAAAGATCTGGCATCACACCTTCTACAACGAACTCCGTGTTGCCCCAGAAGAGCACCCAGTCCTTCTGACTGAGGCTCCACTCAATCCCAAAGCCAACAGGGAAAAGATGACCCAGATCATGTTCGAGACCTTCAATGCACCAGCCATGTACGTCGCTATCCAGGCCGTACTCTCACTGTATGCTTCCGGTCGTACCACTGGTATCGTACTCGACTCTGGAGAT…
>Chil_74
GGGACGATATGGAGAAGATCTGGCATCACACCTTCTACAACGAACTCCGTGTTGCCCCAGAAGAGCACCCAGTCCTTCTGACTGAGGCTCCACTCAATCCCAAAGCCAACAGGGAAAAGAATGACCCAGATCATGTTCGAGACCTTCAATGCACCAGCCATGTACGTCGCCATCCAAGCTGTACTCTCATTGTACGCTTCCGGTCGTACCACTGGTATCGTCCTAGACTCTGGAGATGGTGTCACACACACCGTACCAATCTACGAAGGTTACGCTCTTCCCCACGCCATCCTCCGTCTCGACTTGGCCGGTAGAGATCTTACTGATTATTTGATGAAGATCCTCACCGAGAGAGGTTACTCATTCACAACCACCGCCGAGAGAGAAATCGTAAGAGAC…
>Chil_76
AAAGAAGAAAAAGAAGAAAATCAAGGAAAAATACACTGAAGATGAAGAATTGAACAAAATGAAACCCATCTGGACCAGAAACCCAGATGATATTACACAAGAAGAGTACGGAGAGTTCTACAAATCCCTGACCAATGATTGGGAAGATCATTTGGCTGTCAAGCATTTCTCAGTAGAAGGACAGTTGGAATTCAGAGCTCTACTGTTTGTCCCAAAGAGAGCTCCGTTTGACATGTTTGAGAACAAAAAGAAAAAGAACAATATCAAGTTGTACGTCAGAAGAGTGTTTATCATGGACAATTGTGAAGACCTCATCCCAGAATATCTCAATTTTGTTAAAGGTGTCGTCGACTCAGAAGATTTACCTCTCAACATTTCCAGAGAGATGTTACAACAGAG…
>Chil_86
GTTTGAGTATAATTGTCTATTGATTTCCCTCAGCCTCTTGTTCTTCCTCCTCCTCGTACTCCTCATCTCCCAGATTATCGTCTACAGTAGCATCCTGGTATTGCTGATACTCTGAAATTAAGTCATTCATATTAGACTCAGCTTCGGTAAATTCAAGTTCATCCATGCCTTCTCCAGTATACCAAAACAGGAAAGCTTTTCTACGGAACATTACGGTGAATTGGTCAGAAACTCTTTTAAATAGCTCTTGAATAGCTGTGCTGTTTCCTATGAATGTAGCAGACATTTT
>Chil_87
CACAAAAATCATCGGTCGTTGCATCTTGATACTGTTGGTATTCGGAAATTAGATCATTCATATTCGACTCCGCCTCGGTAAACTCCATTTCGTCCATTCCTTCACCTATATACCAATGTAGAAAAGCTTTCCTTCGGAACATTGCGGTAAATTGTTCGGAAATCCTCTTGAAAAGTTACCTGAATGGCAGTGCTGTTCCCTATGAACGTACCAGACATTTTTGTTCCTTTAGGTGGAATGTCACAAACGGCAGTTTTCTACATTGTGTGGAATCCATTCAACAAAATACGAACTGTTCTTGTTTTGAACATTTAACATTTGTTCATCAACTTCTTTCATTGAAATATGTCCGCGGAAAATA
>Chil_90
GAATGGTCCTAATTCGTTCAAAACACTGTATTATTGTCTTATGAAATGAAAGTAAATAAAGGAATCAGTTCACAATTGAAAAAGAATAGGCTGTCTAATTGTCTTTGTGCGAATTTAATGGAGCATAAAACCGGTGAATGTGCTCATTGTATGGATATAGAATGGAGGAACACCATCGGCGCCATGTTTCACTACCTCGACATGATCTCCCTTCTGTAGATGGACAATTTCACTATTTGATGCGCAACCCAATTCTAGATGCTCTGCGTCTGCGTGAATAATCATTTCATCGTGGTCGTTGACGTGAAGAGCCATTTCCAAAATGGAGTCCTTCTTGGTGCATATTGTGACACTAGAAATAAAAGAAGCCTTCTTCTGGTGCTACTAAATTTTCCAG
>Chil_91
CTTTGGTGAGGGGAATATGAAACCAGTTTTTAGTATCCAGCCAATTCAGCGAAGGTGGCGTCCAATTCGTCGCTGATTGCCTTATATTTCTCCTTCTCAGTAAGCAATTCATCTGTACAACTGTGTAGATCATTCAAAAAAAAGCATGCATCTCTACAAATTGTTTAAGTCTGCTAATGTAGCATCCATTTCTTCTTGCAGATCCATTCTTTGTCTGTGTTCATTTTCATAATCCTCTTGGTATTTTGTCCCACCTCTCTCTGTTAACGTTTGAACAGTACGATCACTTAGTTTCACGCCCTATATTCAGCATTCCTTCAGTCTTGTTTGTAAGATCTCTGTATTTGTTTCTTCGTAACTGTCCTCTCTCTGTGA
>Chil_92
TTTTTTTTTTTTTTCTTGTAGTTAAAGCAATACAAGTTTATTGTCGGTAAAAACAAGTTGGCAATATCCAGGGAGTCGTCACATGATGAACACAATGTCATCATAAGTACAGCTCTCGTAACATATTAGTTCCAAACTTCTTACTAAAAATGTTGTCAAATGACAAAAAAAATATGTAAAGTATAAGAATATTTATAATAAAGAATAAAAATTTGGTACAATACAATTAAGAATTGTTCTGTTATAGAAATACAATAATTTACTTATGAAAGAAGTGGAGCATATTTTGTGAACCATAGGCCTGCTACCAGTCTTGGACATACTATACAAATATTACATGACAAAAAAAATCAACGTTCAATACATTATATTATACAACTGTGGTGTCTCCTTCAATCC…
>Chil_103
GGAATGTGTAAAGCTGGATTTGCAGGAGATGATGCTCCAAGAGCTGTGTTTCCATCCATTGTCGGAAGACCCAGACATCAGGGCGTAATGGTTGGTATGGGACAGAAAGACAGTTACGTCGGTGATGAAGCACAGAGTAAGAGAGGAATCCTAACTTTGAAATACCCAATTGAACAC
>Chil_123
GAGGATGAATGTGTAACGTTCAGTGGCGCTGGGTCAGCTGATGACATCATTCTACCAACGTCAACAATCATAACATTTTCTACGCCAAAACCACCAGAAACCCCTCAGCCAAGCACATTGAAAAATATGAATAGAATATGTGAAGGTGGTGCTGAAGGATGCATAGAAACAAGTCAGCCTAACGTACTTGTGACTACGCTAAGAACAGAATCACAGGGTCCACCAGACCGTGAAGACGATAAGAAAAAGTTAGCACTATTTATTGGAATAGGTGTAGGTGTGGCATTTACTGTTATTATTCTAATTATAGCATTGTATAAATTCCGAAGTAGAGACGAAGGAACATATAAAGTAGATGAAAGTAAAAACTTTGCTTATTTAGAATCTAAAAGTTTACAA…
>Chil_126
TGCTACAAATTTTCCAGTATCAACATGGTATGCGTGTCCAGAGTTTACTCTGACTTTATCAAAATGAGCAATCTCCTCAGCGGCAATGTTTTCAATAGGATGGGTCAGTTCAGCAGAAAATGCCACGTGGTGAGATTTAAAATATTCGACCTCCTCGTGCAGATGTTTAATTTCTTGATGGAGTTCGTCAATCTCATGCTTGTTATGTTCTGTATGGTTTTCAACATCGTGAATTTCCTTTTCGATTTCGTGGTGGATGAACTTTTCAAGGTCAGCATTGAGTGATGTTAAATCGAATTCGGCCTTAAGGAAAGCGTCGTGGTGGCCAACTATCGGGGCATCGTGGTGGTCATCGTGATGGTCATCAACAGGATTAGTTGACCCCTGGTCAAATAAACT…
>Chil_143
TAACATTTTATTCGTATCACAACATAGCAAGATTTTACTAATTTTTTACCTATGTTACGTACAGAGTAATAAATAATTTGTTAAAAGTTTATCCTATATAATACAGTACAAAAATAGTCATTTAGATATCCATCAATGTAAGAAGTTTTTTTCACATCTTTGACAGATGAAAGACTGTGCGGGTCCGGATATCCGCTTTGCAGGCCTGCCGAGAAAAGCACAACAATCCGAGGGGAGCAAGCGAAGACAAGCGACAGAAAAAGAAGAGTCTAAGATTTGATTGATAAAAATATAAAAAAAAAAATTTATATATTTTTCTCAATGATATGAACTTTTTACCACAGGCATGGAAATAATTATAGGTCTTGAAAGTTTGTTCCATGCATTTCTCAATTTAAA…
>Chil_144
ATCGACCTTGTTGTCATATTCAGATTGAATATCTCGGATAGCTTGAGATAACTCGCTCTTCCAGAATTCTCTGTTTTCTTCTGTGGTGTCTCTGTACGCCAAAGCTGCCAATTCTTTGAGTTCCTGTTCGTGGACCTTCTTCAAGAACTCCATCTCTTCCTCAAGTGTCTGTCGTCTGTTCTCAGCATCTAAGTGGTTCAAAATTTATGCGAAAGGATTTGCAGTTTATATGAAGATTTCACCACCCCCTTTTTAAAGAAATAAAATTAAAACATTTATATTTACAACTTCATTTGACCAGTTCATTTTAATGTTTATTCGTTGTCTTCTTCGGGAATCTCTTGTTGTTGTTGTACTCTTGGAGTTGTAGGCTTTCCATACTTTTCTGCCCATTCTTCA…
>Chil_157
TTTCAAAGCATTGGAAGAAGTAACTCTCCAAATAGAGAAGATCAGGAATCCAACTGGTGCACACGATTCTCCAGCACGCACCTGTGAAGATCTCAAACACCATAATCCAGATATTGAAGATGGTGAATACTGGATTAACCCTAACCTTGGACCAATATATGATGTTATTAAAGTAAGATGTGACTTCAAGAGGAAGAGAACTATTTACATGTGTACAA
>Chil_167
CGAAAGCAAAAAAGGAAAATCGGGACTCAAACGAAATAAAAAAATAATCTGTAAAATAGGTGTTTAAGAATTTAACCGAATGCAATTCCAATTTTCCTTCTTTCTAATGTAAAGATTTCTGTACATTATTTTACAAGCACTCCCTTTCCTTTCTTCGACACACATGAAAAGCGTTCAAAATTATGATTTATAAATAAATAAATATTTTCAATTACGAAATGATCACAGTACTGATAAGCTTGAAAGTCAATTGCACGTTTCCCTTATTATATTGTCTCCCCAGTTTTGTCCTTTCTCAGAGCTCCTTTTTATTTGTACTCAAAAGTCTGAAATACCATAGGTTTGATCAACTGTAGGCTGACCGGTCTGATACGTCTTGGATGAATAAGTCTGAGTTGT…
>Chil_187
GGACAACTGGACGTATTCTGTCGCACGGAGACATGTGTTGCCATAAACTGTAAAGAAGACACACAAGAGGTCCGTTTGGATGGAGACTGTTGTCCTACTTCATGTGAACCCATCTTGAAACATCCCAAGTTTCCAGCTGCCATTGAATCTGGAAAGGTTATAATGGGGGATGAAAAATCCGGAGGATATAATGGAGGAGGAAACATCTATCCAGGACCTGTTGGTGGTGCTGTAATGGGACCCCCTGGACCAAGAGGACCGGCCGGACCAGCAGGACCAGCTGGACCCGCAGGTTACCAAGGAGCAAGAGGGGAACCAGGAGACCCAGGACAACCTGGATCACCAGGAGAAAGGGGATTCCCAGGACCTTCAGGACTCCAAGGATCAAATGGTGAAGAA…
>Chil_188
GGAAAGGAAAAATAGAATCAGCTTACGAAATCTCAAAAATAACTGCTGATTTGGATTTCATCAATTTAATGGCGTATGACTTTCATGGTAAAGATGATAGGAAAACCGGTCACATTAGTCCACTATATCCTAGAAAGGACGAAACAGGTGCCGAACGAACGCTTAATCAGGACTGGGCTGTTCAATATTGGATAGATAATGGAACTCCAAAAGAAAAACTTGTTCTTGGCATTAGCACTTATGGTAGAACATTTAAGTTGTCGAGTTCCTCAAACAATGGATTCGGTGCAGCAACTGTTGGTGGAGGTTCGCCTGGGAAAAATACTCGGGAAAGCGGATTTCTAAGCTACTACGAGATTTGTTCAAGCGGATGGACAACAGTATGGAATGATGAACATA…
>Chil_195
TATTGCTCTAACTTTTGGAGCAGACATTAAAGACGAAAATGGTGTTTTAGTGTTGACAACAGCAAATATCGAAGATGCTCTGAAAGAAAACCCCAACATCTTGATCGAGTTTTATGCCCCATGGTGTGGCCATTGTAAAGCTTTAGTACCAGAGTATGAGAAGGCAGCCAAAGCATTAGCTGATGAAGGGTCAGACATAAAGTTAGCCAAGGTTGATGCTACTGTCGAGACTTCACTTGGAGAAAAATATGAAGTCAGAGGCTACCCTACCATCAAATTCTTCAGATCAGGAACACCAACTGATTATTCAGGTGGTAGACAGTCAGCTGATATTGTAAACTGGTTGAAGAAGAAGACTGGTCCCGCTTGTGTTACTTTAGATTCAGTAGATGCTGCTAA…
>Chil_199
CAATATTCCATCCTTACACGACACTTTAACCTCCTCTGGTCGGAAATTTTCAACATTGAATTTCATCAAGTTGCTGTGACTATCACTTGACACTAAGGCACCTCCTTCATGTGGTACAACTTGTAGTTGTCTCTCCTCTGGATGAAGGTATGGGGCTTCTAATACCATAGTACCATCTGATCTCATGAAGCTGTGCATTTTCTCAGCATCAACATTCTCTGGAACCTTGACGGTCCTTTTACGTTCAACAGTACTCCCCCCATTCATCATTACCATCAGTGTACTTGGCATGAATAATTACATTACCGTTATCAACTTTCACTTTGACATGCTGTGCATCAAAGTCTCCGTATTTTTACGCTGTATGTCCCACTTTTTATCCGCCAGTGAAGTCTCCGG…
>Chil_204
AAAAACTCATACCAATCAGGGAGAAAAATTAAAAGTAAGAATAACAAGTGTCACTCTGGTGAAAAATCCTTGTCGGAAGGATGCCTACAAAGAAGGAATGAAACTACTAAGAATAATAACAGTAGTCAACTACGGTTGTGTCAGATTTACTTGGGTGACATCCATCATCACTACTGTTGTTCCTGTCATCTTCGTCATCCATCTTTACCGATTCTTCACGGACAGTCATTCCACGTACACGCTGGCATGTCGATGTGTACTTGTACAAATAGAAAGGCTAGTATGTTGGGAGGTTAATACTACTGTAGGCAGATCCATCAGACCTGCAACAGTACTGTATTTTTGTGTTCCTGCCGTATTCTCCATCTGGAAGAACACCACCATGTGAGTTAGCATTTG…
>Chil_206
GATGGAATTAGCCAAAAAGAACAGCTTGTAGTGCAATGATTACCCAAGGTGCAAATGGTCAGTTCTACTATCAGAAAGACATGAATTTACCATTTGGAAAATCCAAATTTAGACTTGACCTCTGAACCAGATGCTATGACCTTCAACTCAAAATCCCATATCAACATATGGCGTCTTGCCAACCATGAATTCATGGACTCATTCGGGGTCGAGATGAATGTAAAACTCACTCCGTTTACCGGAAAGAAGGGATCTAAAACAGAACAGATCATGTTAAACTGTCTCCATAGCGACGCAGTACTGGAAGAAGACCAATGCTCGCCTTCTATGTCTCTACAAGTCAAGAAAGAACCTAAGAAGTACACATTCATCGCGCAATTGTTTACACGCACTGATAGA…
>Chil_211
TGAGGGAAATCGTACATTTACAAGCCGGACAATGCGGAAACCAAATTGGTGCCAAGTTCTGGGAAGTCATCTCAGACGAGCACGGTATCGACCCCACCGGAACCTACCATGGAGATTCAGATTTACAATTAGAAAGAATCAACGTCTACTACAATGAAGCTACAGGTGGAAAATATGTACCACGTGCTGTTTTGGTCGATTTGGAGCCCGGAACCATGGACTCTGTCAGATCTGGACCATTCGGTCAAATCTTCAGACCAGACAACTTTGTTTTCGGACAGAGTGGTGCAGGAAACAACTGGGCTAAGGGACATTACACAGA
>Chil_212
TGAGGGAAATCGTACATATGCAAGCTGGTCAGTGTGGAAACCAAATTGGAGCTAAGTTTTGGGAAGTTATCTCAGACGAACACGGTATCGACCCCACAGGAACCTACCATGGAGATTCAGATTTACAGTTAGAAAGAATAAACGTCTACTACAATGAAGCCACCGGTGGAAAATATGTGCCACGTGCAGTGTTGGTCGATTTGGAGCCCGGAACCATGGACTCTGTCAGATCTGGACCATTCGGTCAAATCTTCAGACCAGACAACTTTGTTTTCGGACAGAGTGGTGCAGGAAACAACTGGGCTAAGGGACATTACACAGAGGGTGCTGAACTTGTAGACTCTGTTCTCGATGTTGTCAGGAAAGAGGCTGAAAGCTGTGATTGTCTTCAGGGATTCC…
>Chil_214
TTTTTTTTTTTTTTTTTTTTTTTTTTAGTTAATTTTATAGTTTATTTTTGTTACAACAATGAACTTTATAAAAATAGATAGAAAAATAGTTTGAATCTAACAGTGATACAAACGGAATGCTGTTTAGTAACATAAAATATAACATAACAATTAGTTGAAGTTCTGAGCAGTTTTAAAAGCACTTTCTGTGGACAATGGATGGACCTAGCCTCGTCGTATTCCTGTTTGCTTATCCACATCTGTTGGAAGGTTGAGAGTGAAGCTAAGATGGAACCACCGATCCATACGGAATATTTCCTTTCTGGTGGAGCAATAATCTTGATTTTCATTGTTGATGGAGCAAGTGCTGTGATTTCTTTCTGCATACGGTCGGCAATACCTGGGTACATGGTTGAACCA…
>Chil_215
CTTTCTGGTGGAGCAATAATCTTAATTTTCATTGTTGATGGAGCAAGTGCTGTTATTTCTTTTTGCATACGGTCGGCAATACCTGGGTACATGGTTGAACCACCAGATAATACGGTATTAGCGTACAAGTCTTTACGGATATCAACATCACATTTCATTATACTGTTGTATGTTGTTTCATGGATACCTGCAGATTCCATACCCAAGAAAGATGGTTGGAACATTGCTTCTGGGCACCTGAATCTTTCATTACCGATTGTGATAACTTGTCCGTCAGGTAATTCATTAACTTTTTTCTAATGAT
>Chil_217
GGTACATCCACAACCTTTGTAATGTGTATTGTCATTACATGTCATCTTCAAATCGATATTTGCACAAGTCTTGTGAACATTGCATATTGAGTCGGCTTCAATGTATTCTTGATTTTTGGGGCATACAATATCTTCACATTCATTATGATCACAATCCCATGCACCATCCAAACATGTGCATATGGCACACTGTCTTGTGATATTTTCACCATGTTCCCAAACTTTATTACCAAAACAATACTTGTCATAACAGGTACAATCTGAACGTTTAACTACATTCACCATGATCATCCAAGAATTCTCCATCTGGACATTGACAACCAGGAATGCATTCTTCCTCACAACTTGAATCCTCCGTATTTACAAAAG
>Chil_222
CTTTATTGGCAGTAAATGATTCCTCCATTAATTTGATGTTTGTTGCTCGCTGAAGTTTATCTCGACGGTCGGTTGCTATGTTACATTCTACCACGTCACCTGACAACAAGGTGTAATCCCCACCCTCGATCCTTGTCACCAAATGGAATTTCTACAGGTCCCTTGGCAGATTCATAAGAGATTCTTCCCCCTACGAGGATCACTTTGTCGACGACTATTTTTAAGTAGTTCTCTGTACTGAGCCTTGTATTTTGTTGACACTTATGTCCTCAAATATAACAGTTCCAATGGGTACACTTTGAATATTTACTGCGACTTCCTTTGTATTTCTATTTTGAACATCAAAGTCAACATCATCCCCTAGATTTAGTTTGTTGATATCTCCTTTATATTCACTGT…
>Chil_251
ATTTTGGTTCTCCTCCTACAATACCGGATTCAATTCCACATTCATCATTACCTCTCAGAATCTTGAAGAAACCTGCACTTCCCCAGTCTGGGTTCCATGAGTTGGCAACCAGCCAGTATTTATCTCCATTTTCTGTTCCCCATCCAATAAGTTTAATGGCATGGCCTCCTAGAGCACTTCCTGTTGTATGCTTGTATACACCTGATTTGTAAGTTGGGAAATCAGCATATACTGTGAAAGCTCCCTCTACTGGACCGTTAGTCATAATTTCTGTCATAATTTGTGTCTCCTCTCTTTTGACAGCATAAGCAGACATACCGAAATGTTTATCTTGAGTATAAGATACATTATAACCGGCTTCACATTTATGAGTACATTTAGGGGTCTTAGAATCTTTCT…
>Chil_257
CGATCCGTAATCTTCCTAAGACTGCAGGCGGAGTATTTCCCATTCCTCTGATTCTGTACGACCACAAATTCAACCTCATCCCCAGTCTGTATCTCCACTCCGTCATGTACCTCTGTCATGTGGAAAAACAACTTCTTTCCATCCTCTTTCTCATAATTCAGGAAACCAAATTGTCCTTTTACAGAATCCACCTTAGATCTGATGAACTTTCTTATAGCACTTATATTAACTGCTCTAGTTTGATTATTTGACTTGTTCAAAGCCAGGTTAAACTTGACAGAATCTCCTTTCTGTAGGAAATCCCTTTTATCTGCTAGACTTGTTATTCCATAGGGATATACCTCAGGTTCTGTGTCTTCTACTTCAACATTAAAAGGTTGTACAAGTCCACAGTATTCT…
>Chil_260
ATTGCACTGTCTTGTTCTTGTCTTCATGCCACCTTCACAAGATGTCGTGCATATTGACCAGGATGTCCATTCATTCCAATTTCCATCAACGTTTGTATTAGGGTCATTAACACACTGTGGACCATCAGAATAACAGTAACATTTGACACATCCACCATTCTGAGTATTAATAAGATCTCCGAGTGCATACGATACACCATCCACCTCACACACGTGGCATTCCGTTGTGTCCTTAGGTTCACAACTTTCGGTTTCCATGTCATTACCACAAAATTTTAACTCCCCAATATTCAAGGTTCTATAGCGCCTTTTGACACCAGTTTCACAATTAGAGTCGCATTCACCCCAGTCTGTCCATTCGTTCCATTCACAACAATCTAGGTTTTTCATAGACAAAAA…
>Chil_275
GGATTATAATTTAGTACCAAAATTTATGATAAAAGAGATGAAAACTCATTTCCTATCGTTAATTATCCATTTTTACATGGTGACGTTCCCTTGTCACCATCTAATGGTGTTTATATATCTCAACTTGTAAGATTCGCTCGCGTATGTAACAACGTTTTAGATTTCAACGTAGAAATTTATGTATTACTGAAAAATTATTACACCAGGGTTTTCGATATCACAAACTAGTCAAAACATTTACTAAATTTTATCATCGGTATAAGGACATCATTCGTAAATATAGCTCAACATGCAGACTTCTAATACGTTCAGGTATTTCACATCCAATTTTTTATGGAAATATTCTTTATAAAGCACAAAAATGTCAGTATTCACCTCAGAAACTAACAAAACCTTTAA…
>Chil_291
CCAAGAGCTGTATTTCCATCAATTGTTGGAAGACCCAGACATCAGGGTGTAATGGTTGGTATGGGACAGAAAGACAGCTACGTTGGTGATGAAGCCCAGAGCAAAAGAGGAATTCTCACACTGAAATATCCTATTGAACACGGAATTGTAACAAACTGGGACGATATGGAGAAGATCTGGCATCACACTTTCTATAATGAACTCCGTGTTGCACCAGAAGAACATCCCGTTTTACTGACGGAGGCTCCCCTCAACCCCAAAGCCAACAGAGAAAA
>Chil_292
AAAGCCAACAGAGAAAAGATGACCCAAATTATGTTCGAAACCTTCAACTCCCCAGCTATGTACGTTGCTATTCAGGCCGTTTTGTCTTTATACGCTTCTGGTCGTACAACTGGTATTGTGTTGGACTCTGGTGATGGTGTATCCCATACAGTACCCATCTATGAAGGTTATGCCCTTCCTCATGCTATTATGAGGTTGGATCTTGCCGGACGGGATCTCACAGACTATTTGATGAAAATTCTAACAGAACGTGGATATTCTTTTACAACCACAGCCGAAAGAGAAATCGTTAGAGACA
>Chil_293
AGATGATGCTCCAAGAGCTGTATTTCCATCCATTGTTGGCAGACCCAGACATCAGGGTGTAATGGTCGGTATGGGACAAAAAGACAGCTACGTTGGTGATGAAGCCCAGAGCAAAAGAGGTATTCTTACATTGAAATACCCAATTGAACACGGAATTGTCACAAACTGGGACGATATGGAGAAAATCTGGCATCACTACTTTTTACAATGAACTCCGTGTAGCACCAGAAGAACATCCCGTTTTACTAACAGAAGCCCCACTCAACCCCAAAGCCAACAGAGAAAAGATGACACAGATTATGTTTGAAACCTTCAACTCCCCAGCTATGTACGTTGCTATCCAGGCCGTATTATCTTTATACGCTTCTGGTCGTACAACTGGTATTGTGTTGGACTCTG…
>Chil_294
GAATGACACAGATTATGTTTGTGAAACCTTCAACTCTCCAGCTATGTACGTTGCTATCCAGGCCGTATTATCTTTATATGCTTCTGGTCGTACTACTGGTATTGTGTTGGACTCTGGTGATGGTGTCACCCATACCGTACCCATCTATGAAGGTTATGCACTTCCTCATGCTATCATGAGATTGGATCTTGCCGGTCGGGATCTCACAGACTA
>Chil_296
ACCTCCTAGTCCTTTCTCTTTGATATACTGTGCTTTAATCGTAACACTTCGAACATTGTCGTATCCCACCCACTGATCTCCAGAATATGCATATGGAACTTTATGTTCATCATTCCATACTGTTGTCCATCCGCTTGAACAAATCTCGTAGTAGCTTAGAAATCCGCTTTCCCGAGTATTTTTCCCAGGCGAACCTCCACCAGCAGTTGCTGCACCGAATCCATTGTTTGAGGAACTCGACAACTTAAATGTTCTACCATAAGTGCTAATGCCAAGAACAAGTTTTTCTTTTGGAGTTCCATTATCTATCCAATATTGAACAGCCCAGTCCTGATTAAGCGTTCGTTCGGCACCTGTTTCGTCCTTTCTAGGATATAGTGGACTAATGTGACCGGTTTT…
>Chil_298
TGCAAGAAAGCCTTACGACGGAACATAGCGGTGAATTGTTCTGAGATTCTCTTAAAGAGTTCCTGGATGGCAGTGCTGTTTCCAATAAATGTGGCGGACATCTTAAGACCACGTGGTGGAATGTCACAGACGGCTGTCTTGACGTTGTTGGGGATCCATTCAACGAAGTAGCTGCTGTTCTTGTTCT
>Chil_302
CTTCTACGTCACTAACAATGACACCACTCACTACTGGATCAACAGTTACCACAACAGTAACAGTCACCTTATCAACAACAGTTCCAGATCAATGTATATTTACCAAAGAAATCTTCCAAGAAAAATTTGGATATGACACAACTAAAGTTATAGGTTACATAGAGAAAGATGGAAAACCAGGTTTTACATCAACATCAGAAGGAGTTAACATTGGTGATATCTTACAAATTGGTACAGTTGTTACTGCTCCCGGATGCACTAATTGTACCTGTACAGAAGGTGGATATATTGAATGTGTAACAGGATCATGTCAATATTGCGAATATAGTGATTGGTCTGAATGGACAGAGTGTTCTAAACCATGTGACAATGGTGGAAAGTCTAGGAATAGAACTGCTA…
>Chil_303
TGCAAGAAAGCCTTTCGTCTGAACATAGCAGTAAATTGTTCCGAAATACGTTTGAATAATTCTTGGATGGCTGTGCTGTTTCCAATAAATGTAGCAGACATTTTCAGACCTCTTGGTGGAATGTCACAGACTGCTGTCTTGACGTTGTTGGGAATCCATTCAACAAAATAGCTGCTGTTCTTGTTTTGTACGTTCAACAT
>Chil_304
AACTCTCCTTCCTCTTCCGCTGTTGCATCTTGGTATTGCTGATATTCGGATACCAAGTCGTTCATGTTGGATTCTGCTTCTGTGAACTCCATTTCGTCCATACCCTCACCAGTGTACCAATGCAAGAAAGCCTTACGACGGAACATGGCAGTAAACTGTTCTGAGACACGCTTGAATAATTCCTGAATGGCTGTTGTGTTTCCAACGAATGTGGCAGACATCTTAAGACCACGTGGTGGAATATCACA
>Chil_308
TTTTTTTTAAATGTTCATGATTTCTTTAATCAAGCACTGACGCATCAAAAATGTAACAGTAAGACAACAAAATGTGTTGACATAAACAATTTGTTAGTCTGCTTTCTATTTTATTCTTTCTTATATGTAAGTTGTAAGGAATGAATGTCTATTAGTGTTATCAAAAAATAACAATGCCAAAAATGAAAAAAATAAAGCTTATGAACAATGGACAACATTTGTATTCATTTTGTTCTTAAAAAAATGTCCAATGATTTGTTTATTAAGTCCAATACACCAGTGTTTGAAGTGTTTGTTAGTTTTTGTTCTTTAGTCGACCTCTTCAATGGTTGGTCCACCACTTCCACCAGTGCCTCCTGCTCCAGGTGCACCTCCTGGGGGTCCACCAGCTCCTCCAAA…
>Chil_310
CAAACACCTCTCCACATAGCGGCAAGACTTGGTAATGTTGACAATGTGACTTTACTGTTACAACACGGAGCCAATGCTGACGCTGTCACCAAGGATTTATACACACCATTACACATCGCTGCAAAAGAAGGAAATGAAGAAGTAGCTTCTGTCTTATTGGATCATGGAGCATCACATGGTCTTACCACTAAGAAAGGATTCACACCACTGCATATTGCAGCCAAATATGGAAACATTAAAGTTGCAAGTCTACTCCTACAAAAGGGAGCTAATCCAGATGTACAAGGAAAGAACGGCCTGACCCCTCTACATGTGGCTACACATTACAATCATTCTAATGTAGCTTTTCTACTGTTGGACCACAAGGCATCACCACATTGCACAGCTAAGAATGGCTAT…
>Chil_324
AAAGAGGTCCTGATGGAAGACGTGGAGACCCCGGAACTGATGGAAGCCCAGGACCTTCTGGACCACCAGGACCAACAGGTAGACGAGGACCATCAGGTGAAGACGGACGCAGGGGATCAATGGGAGAAGCCGGTAATCCAGGACCACCTGGTCAACCAGGACGAAACATTTATGGTGGTGCAATGACCCAGTGGTTCAGAAACCCAGCACAAGGAGGAAACAAAGGATGGCAAGGAGATGATCCAATTCCAGCAGAAGAGATTGATGCTGATTGTTTTACAAAGCATTGGAAGAAGTAAACTCTCCAAATAGAGAAGATCAGGAATCCAACTGGTGCACACGATTCTCCAGCACGCACCTGTGAAGATCTCAAACACCATAATCCAGATATTGAAGATG…
>Chil_328
TAAGGTGTTCATAGCCATGTCTTTTAAGGTTTTTTCTTTTCTACTGAGGCACTTATACCCTGGGCACATATCCTCGTCACCAAAGACTCTCGAATGGCTTGCAGTCCATTTGGACTTTCTACTTCAAAAACATTGGCTGGGTCGTTAGCAATACGAGCTAATTCAGCAGGGTCTCTATAAGGTCCGACTCCTATGGCAAATAACAAGTAGTTCAGAGAGTGAAGCTTTGCCAGCTCTTTCTTTGTTTCATAAGGATTTGTAGAGACACCATCTGTAATGATTACAGCGATTTGTGGAACATCATCTCTAGAACCATATGCTTTATTTAGTCCTTCTGTCCTCAACATTCTTAATGCCTTATCTAAGTAGGTATTGCCTCCTTTCCACTTTATCCTAGAA…
>Chil_340
CACATAAGACCAATATCTACTTTTGTATCCAATATGAAGGCAGCAGTTATTCTGGCTATCGCTCTTGTAGCAATTCTTGCAGTCCATGAGGCAGAGGCAAGTTGTGCTTCCAGATGTAAAGGCCATTGTAGAGCAAGACGCTGTGGATATTATGTATCAGTCTTATACAGAGGGCGTTGCTACTGCAAATGTCTTCGTTGTTCCAGTGAGCATTCCATGAAATTTCCTGAAAATGAAGGATCATCTCCATCTGACATGATGCCACAGATGAATGAAAATGAGAACACTGAATTCGGCCAGGACATGCCCAC
>Chil_342
CTGTTGTCAAAGTCTTCGCCACCAAGGTGAGTATCTCCGGCTGTTGAGCGAACTTCAAATAAAGAACCCTCGTCTATCGTAAGTATAGAAACGTCGAATGTTCCTCCTCCCAAATCAAATATTAAAACGTTTTTCTCGCCTGATAAATTCTTGTCCAGACCATAAGCTAGAGCAGCAGCTGTTGGCTCATTTATTATTCGTAGTACGTTAAGTCCTGCAATGAAACCAGCATCCTTTGTGGCTAGTCTTTGAGAATCATTAAAGTATGCAGGTACTGTGATGACGGCATCTGTAACTTT
>Chil_357
GTAAGGACACAGATATTACACTCACACAAAATGGCTGACCAACTAAATGAAGAACAAATTGCAGAATTTAAAGAGGCTTTCAGTCTGTTCGACAAAGATGGCGACGGTACCATTACCACAAAAGAACTGGGAACTGTCATGAGATCTCTCGGACAAAATCCAACAGAGGCAGAACTACAAGACATGATCAACGAAGTAGATGCTGATGGAAATGGAACAATAGATTTCCCAGAATTCCTGACAATGATGGCCACGGAAAATGAAGGATTGTGACAATGAGGATGAGTTACGAGAAGCATTCAAAGTTTTTGATAAAGACGGTAATGGATTCATCAGTGCAGCTGAACTTAGACACGTGATGACAAATCTTGGAGAAAAATTAACAGACGAAGAGGTAGA…
>Chil_372
AAGAGGGTTCACACTGGGAGTGTAAATTAATCTACTGTTTACTATTATACGGTGTAACAGTAACATGCACATGGATTTTTACGGAGGCCTTATATTTACATATGTTGGTATACAAGACACTATTCACGGAGAGGCATGGTGTAAAGCTGTATATGATCATTGGTTGGTTTACCCCGCTGTTATTTGTTATACCATGGATTATTGTAAGAATAGAACTTGAAGACGTATATTGCTGGAATTGGACTGGTAATACAGATTATCAGTGGATCATCACTGGACCTGTTCTTCTTATCAATGGGATAAACTTTATTTTCTTCGTTGATTTAGTACGAGTTCTGTAATAAAAGAGTACATACAAATAAGCGGGTAACTGGCAGTAGAAAGATTAGGAAACTGTCT…
>Chil_388
ATTACATGTTCCATGTCATAGCAGAAAACAAAACTTAGGAAGAAGTCCAGCTCTAGAGACAGACAAAACAGTTGTTCCTAAGAGTGAATTTGACAAACCAGGCAAACCAGTAGGCCCATTAGAATTCTCTGACATAACCAAGGATTCAGTCACACTATCATGGAGCCCACCAACCAAGGATGGTGGACTACCAATAACTAATTACATCATAGAGGCCAAAGACTCTAAACGTACCACATGGTCCAAATGTGGAGATGTCAGTGCAGAAGAGACCATCTTTGTCGCTGACAAACTTCTGGAAGGTGGTGACTATTACTTCAGAGTTTCAGCTGTCAATGATGAAGGACCTGGAGCTCCATTGGAATCGGTCAAATCTGTCAGACCTCAAAAACAACTAGA…
>Chil_405
AAAGAAGCGAAAAGCGTGTAAATGGCACCTCCATCATATTCCGATTTAGGAAAATCTGCCAGGGATCTCTTCAGTAAAGGTTACAACTTTGGAACCAACAAACTAGAGGCTAAAACAAAAACAGATAGTAAAGTAGAATTCACAAGTAAATTAGACCACAATCATGATACTGGTAAAGTTGCTGGTAGTTTAGAAACCAAGTACAAATGGAAAGATTACGGATTAACATTCAAAGAAAAATGGACAACAGACAATGTGTTAAACACAGAAATAACTGTTGAGGACCAAATTGTTCAAGGTTTAAAATTAGCATTTGACACAACATTTGCTCCACAGACAGGAAAGAAGCAGGGAACAATTAAGACTGGATACAAACAAGATTATGTAAATATGGAATGT…
>Chil_419
GTCTTAGATTCCCAGGTTAATTGAACTCCGATTTAAGAAAATTAGCTGTGAACTTGATTCCCTTCCCAAGATTACACTTCTTCATGATTGGATTCGCCCCTTTGACTTCCAGAGGATCTTAACAATATAGAGCTTTGACTGTGCCAGAATTAACTTAATAAATGTTCGACGCTAAGAACATGATGTGCGCTGCTGATCCCAGACACGGGAGGTATTTGACTGCTTCTGCCTTGTTCAGAGGAAGAATGTC
>Chil_421
TACAAGTCTTTACGGATATCAACATCACATTTCATGATACTGTTGTATGTTGTTTCATGGATACCGGCAGTTTCCATTCCAAGGAATGAAGGTTGCATAAGAGCCTCTGGGCACCTGAATCTCTCATTACCGATTGTGATAACTTGTCCATCGGGTAATTCATTAACTTTTTTCTAATGAGGATGATGATGCGGCTGTGGACATTTCTTGTTCAAAGTCTAGAGCCATATAACATAGTCTTTTTCTTTAATGTCTCT
>Chil_422
GCATACGGTCGGCAATACCTGGGTACATGGTTGAACCACCAGATAATACGGTATTAGCGTACAAGTCTTTACGGATATCAACATCACATTTCATGATACTGTTGTATGTTGTTTCATGTAAACCTGATGATTCCATTCCCAAGAAAGATGGTTGTAACATGGCCTCTGGACACCTGAATCTTTCATTACCGATAGTGATAACCTGTCCGTCAGGTAATTCGTAGCTTTTT
>Chil_429
GTTTTATAAGTGTTCATTCTGAGGTTGGTTCAGTGTTATTCCTCTGTACGTACATCAGTCCTCATATTGTTAAAAACTAATTAAATTGTAAATGTATGCAAATTAAAGATAAAAAATTGTCCAATCTAAATGAAATGATGACGTAATGCCATGAGTCCTTGTAGCATTTTGTATCACATCTATTCGTTGTCCAAGTATTTACGAATTTCTCCTGTGTATTTTGGAGTAACTCCCTTTTTGTTTGCAACAAATCCTAAGCTATGGATACAGTTGATAACATTGAGGAAAGGACCCTTTCTAACTTCCCACAAATCTCCACTTTGGAATTCGGATTCTCTGTCTACGCCATAATCTTGAGTGCCTTTGTTGAAGTTTTCAATGTTTGTCATGGCAACGAAG…
>Chil_439
CACAAACTGTTCCTCAACTGTTAGATGTTTTGATTCACACCATAACTTTAATTCAGGCAGCACCTCTTTTCTTACTATGTCTCTCTCAGTATAAAATTCATCAGAGTATGTTGTGATGAAAACTTTCACAGGTTTCTTTTGTTTTCCTCCTTTTCTAACTGGGACTTCAGGTAATTTCTTTGAACGTCCAGGAGCTGGAATGCCTCCAGTTGCCATAGTAATGGC
>Chil_446
ATGAAATTGGTCCAAAGTAAAGTGGAGCACTTCTTCGTTACCAACAGTTAAAATCCTATGCAAGCTGCAGCGTGAAGAGCATTTTGATTTTGCCAAGAACAGAAGTTGTGGTTAATAGAACAGAGATCATCCAAACATTGCAAAAGCTTTAAAATAATGTCACAGTTTCTAACTATATGTATAAAGAGTCATGCAAGTCATCATTAAAGAAGATATTCCAACAATGTGGAATATTTACTCTCCTCTGCTCCTTGGAAATTTGCTGAAAGTGTAACTTTAGAGTTTTTTCCACGGTATTTATCTAAGTCAAATTTTGCTGTCCACATATCATGTCCCCGATCTTCAAAATGGTGCCACTCTCCTTCAGCTATAACGGCTACTGCTTTTGCATTCGG
>Chil_451
CTGGTATCTATTGTTGTATTTAAAATATTTGGTTCCCCTTGAAGAAGTATGTATACCCATCATTGATATTCAAAGCAGCTTCAACATTGTTTGGTATGCCCTTCCAGTAGCTACTAATTGGTTTTGGATATCCAGAAGGTGGGCTTCTACTGTAGTTCTCATGCCAGATACTAAATTTATCATCCTTAAAGACGTAGATGACATTATTATATTCGAGAGCTGCATCTACATTCTGGAAAAATGGAATGGTGATCCTCTTTGGAAAACCAGCATCTAGTCGAAATCTTGTGTATCGAAACAACTTGCTTCCTTTAAATACATACAGTCTTCTGTACCTATCTACTACTGCAGCTCCAGTATTGATAGGTACTCTGGGAGTTAATACTTTCCGTGAAACTT…
>Chil_455
ACCTGGTAGTTCTGGATTCCCAGGACTTAAGGGTGATAAGGGAGATGGCGGACGTCCAGGACTAGATGGTCTTCCTGGTAGCAATGGACAGCCCGGTCAACCAGGACCGAAGGGAGATGCTGGAATCGGTATCCCAGGTCTTCCTGGAATAAGAGGAGAACCTGGATCTAATGGACTGCCTGGAACATCAGGCTTTACAGGATTGAAGGGAGAACCAGGTGTGAGCACTCCAGTTAATATAGCAGACATCAAAGGAAACAAAGGTGACAAAGGTGCACCTGGTTTGACAGGTAGCACAGGTAGAGATGGATTACCTGGAATGAAGGGTGAACATGGTTTGGACGGACTACCAGGTATAAATGGCAGACCAGGAGAATCTGGACCCCGTGGTGAAGATGG…
>Chil_489
AATTTGTATCTGACCGGATGTAACAGCGGATGTGACAGTTTTGTTGATGAAAGCAGTCATTCAGGAGTTAATGTTTTGGAATCCCTGTTCAACATTATTTTGATTCAGTGCATTTACTTAAATGATATGACATTAAAATGACAATGACTTCACAGTATGTTTGTACTGTTGTATTGAAAATAGTACCGGTAACTGTGTTATATAATCATACTTGTTTATTTACTTAGTTTGAAAACGTCAGTATTGTGATATAACTTTGAACAAATTGCATGTACATGTACTAGAGAAATCCTGAGTGTATTTGTAGCAGATTGCAGGAAAGACACTGGGCTGTTGATGTGCAAATGTAGATCTGTATCATTATATATATTATGACATTTTGCTTAAATTTTGACATAC…
>Chil_500
GGTTGCTACCCTCTTAGCCATTTTCTCACAATTTTCATCAGAAATGGCTGCCAACAACGAAAGATCTTTCATCATGGTTAAACCTGATGGTGTTCAAAGAGGGTTAACTGGCGAAATCATCAAAAGATTTAACAATAGAGGCTATAAACTGGTTGCATGTAAATTAGTTCAGCCATCCAAAGAATTTATGCAGAAGCACTATGCTGATTTATCTAGCAAACCTTTCTTCAATGGGTTGGTAGAATATATGTCCTCTTCTGGACCAGTTTGTGCTTGTGTATTTGAAGGCAAAGATGTTGTGAAAACTGGACGTAAAATGTTGGGTGAAACAAATCCATTAGCCTCTGCTCCAGGAACAATTCGTGGAGATTATTGTGTTGATCTTGGAAGAAATATATG…
>Chil_512
GCTCCACCAGAAAGGAAATATTCTGTCTGGATTGGTGGTTCTATCTTGGCTTCACTTTCTACCTTCCAACAAATGTGGATAAGCAAACAGGAATACGACGAATCTGGTCCATCCATCGTCCACAGAAAGTGTTTTTAAACTGCAAAACGTCTTGCTCAAAACTTCAACTAATTGTTATAATACATATATTTGCGTTGATATGCTAACTTTTGTATCTATTTGTATCATTTCTAAATTCAAATTATGTAATATTATTTACGTTTAAAGTCTTTGAAATACAACAAAAAT
>Chil_519
GCAAAACAGTAGATGCTTTAGGTATTGGTTTCAATCTTCTCTTACGCTTTCCTGATTCTTCGTCGCTGCTAGAACTACTAGATGATGATGACGATGACGATCGTCTGCTTCTCAAAGACAATGTAGATCCAAGACCACCTGATTTTAGTTTCGGAATTATTACTTTTTTAAATAGTAAAAACATGAGAACACCAAATACAATTACTCCGATAACTATACCAATTATCATGCCAACGATTTGTTTGGTAGTCAATCCACTTGTTGTTACTTCTTGTAAATAATAGGATATATTGAATCCTCTGTAGAAGGCTGAATCATCAGTTGTGAAGACTACCAGCACATATAGACCATTAGACTGTGTGTATGTGGGTGTTACTACACCACAAAATGTCGCTAATG…
>Chil_520
CAAAAACCGCATTATGTCGATGGAAAGTTTGATAAATCTGGACACTCTGACTGAAGAAGAACGCAAGATTATCTTGTCTGTCTTGAAGAAAGATGATGAACTCAAAAGGACTCAAGACAAAAAAATAGGGCATCTGAAGTTAGAAATACAAGCTATTCGCATGAAAAGTGTGCTACGGAATGGTGACGACTTGTCCAAAATCTGTGCCAGGTGTCATGCAGAGCTGGGATTTCTCTTCAATCGTGGTGACCTTTGTCCAAAGTGTCATTTTCGTGTGTGTCGAGCATGTCAAGAACAAGGGCTTGCAGGCACATGGTTGTGTACATTATGCCATAAGCAAAGGCAGTTGAAATTTTTTATGGAAGAATGGAATAAGAAAGGAAAGACCAATTAAAAAGA…
>Chil_536
CTTTTCCAAGACAGCTATTAGTAAGTACTTGTGAAATCATTTCCACCCTACCCCAAAAATCATTTCTGTTGTCACACATATTTTCCAAGGAAATTTCCTTGTACACTTGTTGATTTGAACATGAACACAATTTTTAATGCTGCAACACTTGACATTTGTATATTTTATTCCTTGCATTCATTTTCCTTTTATCCAAATCAGTCAAATTTAAATACAAGAACATGACCTACAACCTTATACAAAAAATTGAAAAAATGACTAGAATTGAAGTGCACAGGGTAGCACAATGCTGGTATTAATGAATGGAAGCTATGAAAAATAGAAGAATGGTAACAAATCCTTCCATCGGTTACTTCGAGGTCATCATCGTTACGAACTCTTCATAATTAACTTGTCCAT…
>Chil_556
CAGCTATCCTATCAGGCGATCGTAGCGACACCATCAAAGATGTACTGTTAGTAGACGTAGCTCCACTGTCCCTCGGAATCGAAACAGCAGGCGGTGTAATGACAAAACTAAATTGAAAGGAATACAAAAATCCCTACAAAAGCCTCAAACACATTCACAACATATTCAGACAACCAACCAGCAGTAAGCATTCAAGTTTTCGAAGGCGAAAGAGCAATGACCAAAGACAATAATAATCTAGGAAAATTCGACCTCACTGGTATACCTCCAGCTCCCCGAGGTGTACCGAAAATCGAAGTAGAATTTAACATTGATGCAAATGGACTTTTACACGTATCGGCTAAAGACAAAAGCACAGGAAATACAAAGCAAATTACAATCACAAATGACAGAGGAAGG…
>Chil_557
[truncated: 191 more rows]

## Sheet: GalM.fasta
>GalM_35
[truncated: 487 more rows]

## Sheet: TroV.fasta
>TroV_11
[truncated: 465 more rows]
