# Supplementary material for: Mantle transcriptome sequencing of Mytilus spp. and identification of putative biomineralization genes
Source: PeerJ. 2019 Jan 14;6:e6245. doi: 10.7717/peerj.6245 (PMC6359903; doi:10.7717/peerj.6245)
Supplement: Supplemental Information 16 [file peerj-07-6245-s016.xlsx]

## Sheet: Arkusz1
KEGG Pathway	Contig Name	KO IDs	Description
Tyrosinase	Chil_983	K00121	frmA
	EduN_3346	K00121	frmA
	TroV_1150	K00121	frmA
	GalM_892	K00121	frmA
	EduN_4448	K00451	HGD
	GalT_239	K00503	DBH
	EduN_1771	K00503	DBH
	EduN_1772	K00503	DBH
	EduN_2308	K00503	DBH
	TroV_2415	K00503	DBH
	GalT_710	K00505	TYR
	EduN_6755	K00815	TAT
	GalM_797	K00815	TAT
	Chil_1125	K07253	MIF
	EduN_4683	K14454	GOT1
	GalM_2046	K14454	GOT1
	EduN_3578	K14455	GOT2
	TroV_3020	K14455	GOT2
	GalM_1874	K14455	GOT2
Endocytosis	EduN_3574	K00910	ADRBK
	TroV_982	K03175	TRAF6
	GalM_418	K03175	TRAF6
	EduN_246	K03283	HSPA1_8
	EduN_333	K03283	HSPA1_8
	EduN_1618	K03283	HSPA1_8
	EduN_1619	K03283	HSPA1_8
	EduN_3286	K03283	HSPA1_8
	TroV_11	K03283	HSPA1_8
	TroV_2203	K03283	HSPA1_8
	GalM_71	K03283	HSPA1_8
	GalM_142	K03283	HSPA1_8
	GalM_597	K03283	HSPA1_8
	Chil_308	K03283	HSPA1_8
	Chil_1437	K03283	HSPA1_8
	GalT_99	K03283	HSPA1_8
	GalT_494	K03283	HSPA1_8
	EduN_1097	K04393	CDC42
	TroV_2724	K04393	CDC42
	GalM_1805	K04393	CDC42
	GalT_1063	K04393	CDC42
	EduN_558	K04513	RHOA
	EduN_559	K04513	RHOA
	EduN_1151	K04513	RHOA
	EduN_3902	K04513	RHOA
	TroV_2403	K04513	RHOA
	GalM_3121	K04513	RHOA
	GalM_3122	K04513	RHOA
	GalT_1340	K04513	RHOA
	Chil_1809	K04645	CLTB
	EduN_1181	K04646	CLTC
	EduN_8187	K04646	CLTC
	TroV_1220	K04646	CLTC
	GalM_1826	K04646	CLTC
	GalM_2026	K04646	CLTC
	GalM_2353	K04646	CLTC
	GalM_2674	K04646	CLTC
	EduN_6566	K04678	SMURF
	EduN_7962	K04705	STAM
	GalM_675	K04705	STAM
	GalM_1096	K05087	IGF1R
	GalM_3045	K05096	FLT1
	EduN_4934	K05099	MET
	Chil_1497	K05099	MET
	EduN_1683	K05704	SRC
	GalM_1691	K05704	SRC
	GalM_974	K05754	ARPC5
	EduN_3278	K05757	ARPC1A_B
	Chil_1431	K05757	ARPC1A_B
	GalT_2420	K05757	ARPC1A_B
	EduN_1469	K05758	ARPC2
	EduN_1483	K06069	PRKCI
	GalT_1091	K06278	CAV1
	GalM_2586	K06564	IGF2R
	GalM_3154	K07889	RAB5C
	Chil_818	K07889	RAB5C
	EduN_5965	K07897	RAB7A
	GalM_2400	K07901	RAB8A
	GalM_1082	K07903	RAB10
	Chil_1040	K07904	RAB11A
	EduN_3577	K07937	ARF1
	EduN_6151	K07937	ARF1
	GalM_3002	K07937	ARF1
	Chil_1547	K07937	ARF1
	GalT_412	K07937	ARF1
	GalT_2608	K07937	ARF1
	EduN_1817	K10591	NEDD4
	EduN_4781	K10591	NEDD4
	EduN_3332	K11825	AP2B1
	EduN_2322	K11826	AP2M1
	GalT_1250	K11826	AP2M1
	TroV_2550	K11981	RNF41
	GalT_1408	K12183	TSG101
	EduN_1755	K12192	CHMP2B
	EduN_3311	K12193	VPS24
	TroV_971	K12194	CHMP4
	Chil_1992	K12196	VPS4
	GalT_931	K12196	VPS4
	GalT_1532	K12197	CHMP1
	GalT_286	K12200	PDCD6IP
	EduN_6398	K12470	SH3KBP1
	GalM_696	K12470	SH3KBP1
	GalM_2231	K12475	DAB2
	EduN_4270	K12486	SMAP
	EduN_8019	K12488	ASAP
	TroV_471	K12495	IQSEC
	GalM_2910	K12495	IQSEC
	EduN_2681	K12959	CAV3
	EduN_4802	K17917	SNX1_2
	EduN_5190	K17918	SNX3_12
	EduN_4126	K17920	SNX5_6_32
	GalM_2509	K17920	SNX5_6_32
	Chil_1906	K17920	SNX5_6_32
	Chil_711	K18441	CYTH
	GalT_2462	K18465	MRT43
	EduN_7403	K18468	VPS35
	EduN_1701	K19366	SPG20
	GalM_869	K19366	SPG20
	GalT_170	K19476	IST1
Calcium signaling pathway	EduN_518	K04160	HTR4
	EduN_177	K05863	SLC25A4S
	EduN_321	K05863	SLC25A4S
	EduN_782	K05863	SLC25A4S
	TroV_47	K05863	SLC25A4S
	GalM_560	K05863	SLC25A4S
	Chil_121	K05863	SLC25A4S
	GalT_131	K05863	SLC25A4S
	EduN_2685	K05853	ATP2A
	EduN_5462	K05850	ATP2B
	GalM_1116	K05853	ATP2A
	GalM_1299	K05853	ATP2A
	GalM_2695	K05850	ATP2B
	EduN_148	K02183	CALM
	EduN_1788	K02183	CALM
	EduN_2298	K02183	CALM
	EduN_2825	K02183	CALM
	EduN_3211	K02183	CALM
	EduN_3212	K02183	CALM
	EduN_3802	K02183	CALM
	EduN_3912	K02183	CALM
	EduN_4424	K02183	CALM
	EduN_4522	K02183	CALM
	EduN_4922	K02183	CALM
	EduN_5911	K02183	CALM
	GalM_1461	K02183	CALM
	Chil_2045	K02183	CALM
	Chil_357	K02183	CALM
	Chil_536	K02183	CALM
	GalT_1694	K02183	CALM
	GalT_2044	K02183	CALM
	GalT_2336	K02183	CALM
	GalT_3	K02183	CALM
	GalT_935	K02183	CALM
	GalT_936	K02183	CALM
	GalM_3085	K02677	PRKCA
	EduN_7429	K04634	GNAQ
	EduN_4647	K04958	ITPR1
	GalM_1050	K04958	ITPR1
	EduN_1364	K00907	MYLK
	EduN_2848	K00907	MYLK
	EduN_8008	K00907	MYLK
	GalM_1416	K00907	MYLK
	GalM_1485	K00907	MYLK
	GalM_2258	K00907	MYLK
	GalM_2807	K00907	MYLK
	Chil_1132	K00907	MYLK
	Chil_1382	K00907	MYLK
	GalT_891	K00907	MYLK
	EduN_152	K05849	SLC8A
	TroV_2996	K01116	PLCG1
	GalM_840	K01116	PLCG1
	GalT_1220	K05857	PLCD
	EduN_6544	K04345	PKA
	GalM_1983	K04345	PKA
	EduN_5040	K04962	RYR2
	GalM_1833	K04962	RYR2
	EduN_564	K15040	VDAC2
	TroV_771	K15040	VDAC2
	GalM_653	K15040	VDAC2
	Chil_405	K15040	VDAC2
	GalT_164	K15040	VDAC2
Melanogenesis	TroV_3417	K00444	WNT5
	GalT_710	K00505	TYR
	EduN_3731	K02105	CTNNB1
	EduN_4081	K02105	CTNNB1
	Chil_1189	K02105	CTNNB1
	GalM_1461	K02183	CALM
	EduN_148	K02183	CALM
	EduN_1788	K02183	CALM
	EduN_2298	K02183	CALM
	EduN_2825	K02183	CALM
	EduN_3211	K02183	CALM
	EduN_3212	K02183	CALM
	EduN_3802	K02183	CALM
	EduN_3912	K02183	CALM
	EduN_4424	K02183	CALM
	EduN_4522	K02183	CALM
	EduN_4922	K02183	CALM
	EduN_5911	K02183	CALM
	Chil_2045	K02183	CALM
	Chil_357	K02183	CALM
	Chil_536	K02183	CALM
	GalT_1694	K02183	CALM
	GalT_2044	K02183	CALM
	GalT_2336	K02183	CALM
	GalT_3	K02183	CALM
	GalT_935	K02183	CALM
	GalT_936	K02183	CALM
	EduN_4331	K02353	DVL
	TroV_1054	K02354	FZD4
	EduN_1710	K02354	FZD4
	EduN_8153	K02354	FZD4
	GalM_3085	K02677	PRKCA
	GalM_2624	K03083	GSK3B
	GalM_1983	K04345	PKA
	EduN_6544	K04345	PKA
	GalM_2411	K04498	EP300
	EduN_312	K04498	EP300
	EduN_3383	K04498	EP300
	GalT_723	K04498	EP300
	GalM_2501	K04534	GNAO
	EduN_7429	K04634	GNAQ
	GalM_319	K07827	KRAS
